# Supplementary material for: The Molecular Landscape of Medulloblastoma in Teenagers and Young Adults
Source: MDPI journal article supplement (doi:10.3390/cancers14010251), 2022-01-05
Supplement: s1 [file s1]

# List and captions for Supplementary Figures, Tables and Materials, including Figures.

## The molecular landscape of teenagers and young adults medulloblastoma

Omar Mohammed<sup>1</sup>, Maria Estevez Cebrero<sup>1</sup>, Omar Ahmad<sup>1</sup>, Andrew Peet <sup>2,3</sup>, Richard Grundy<sup>1</sup>, Anbarasu Lourdasamy<sup>1</sup>

<sup>1</sup>Children’s Brain Tumour Research Centre, School of Medicine, University of Nottingham, Nottingham, UK

<sup>2</sup>Institute of Cancer and Genomic Sciences, University of Birmingham, UK

<sup>3</sup>Birmingham Women's and Children's Hospital NHS Foundation Trust, Birmingham, UK

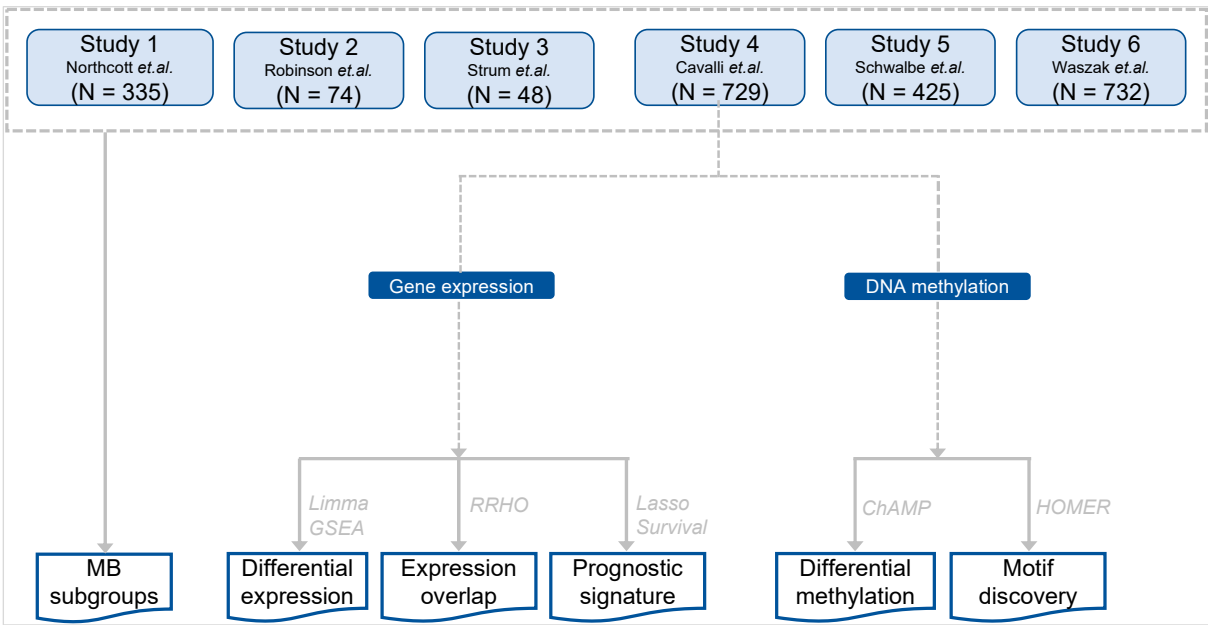

**Figure S1. An overview of the analyses used in this study.** Briefly, age and molecular subgroup data were collated from six different studies and used for medulloblastoma (MB) subgroup analysis. Microarray gene expression and DNA methylation data was obtained from 729 MB patients and used for transcriptome and epigenetic characterisation of teenagers and young adults in MB.

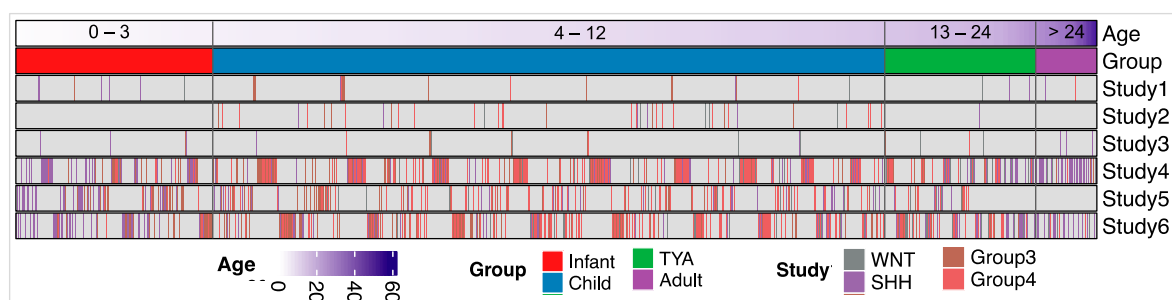

**Figure S2. Distribution of medulloblastoma molecular subgroups across studies.** Four molecular subgroups: Wingless activated (WNT), Sonic Hedgehog (SHH), Group 3 and Group 4 from six different published studies, four different age groups: Infants (< 3 years), Children (4 – 12 years), Teenagers and young adults (TYA, 13 – 24 years), and adults (> 24 years), and age at diagnosis (in years) in ascending order are shown in coloured tracks.

**A**

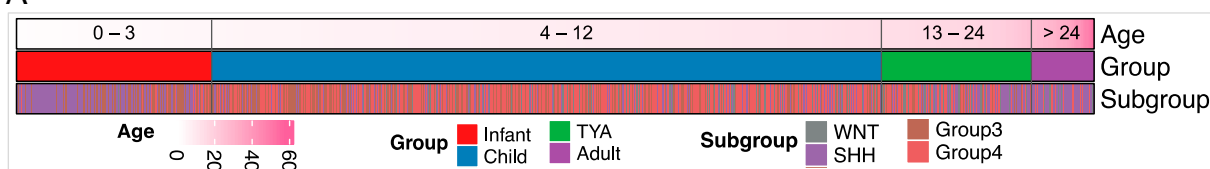

**B**

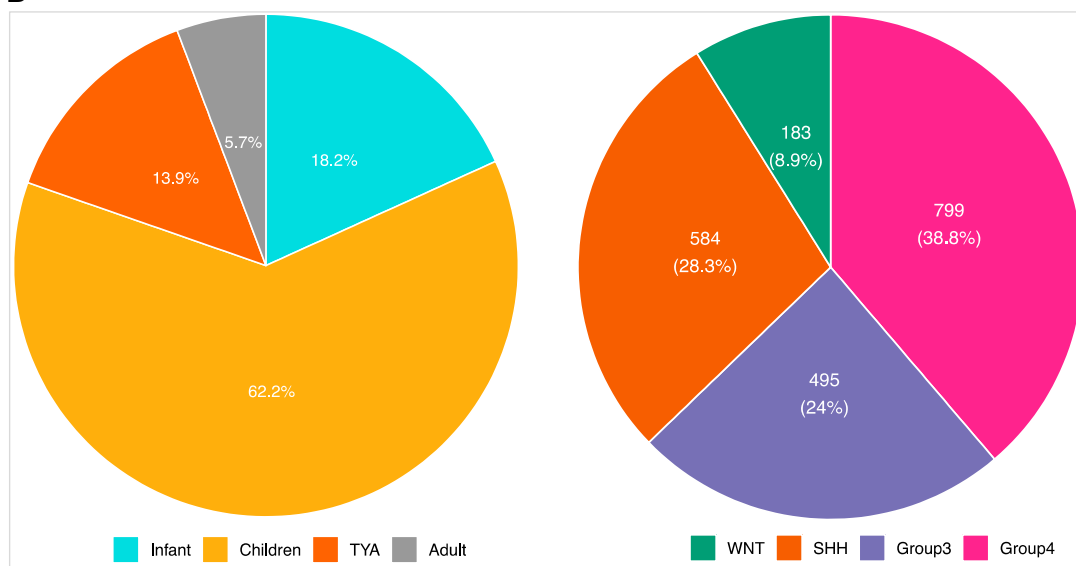

**Figure S3. Distribution of medulloblastoma patients by age and molecular subgroups.**

**(A)** Stratification of medulloblastoma patients by different age group. Four molecular subgroups: Wingless activated (WNT), Sonic Hedgehog (SHH), Group 3 and Group 4 of 2061 medulloblastoma patients stratified by four different age groups: Infants (< 3 years), Children (4 – 12 years), Teenagers and young adults (TYA, 13 – 24 years), and adults (> 24 years), and age at diagnosis (in years) in ascending order are shown in coloured tracks. **(B)** Two pie charts describing the distribution of age groups and molecular subgroups for medulloblastomas: 1) Infant (<3 years), 2) Children (4-12 years), 3) Teenager and young adult, TYA (13-24 years), and 4) Adult (>24 years). Molecular subgroup and age data were collected from published studies that resulted in a total of 2,061 medulloblastoma patients.

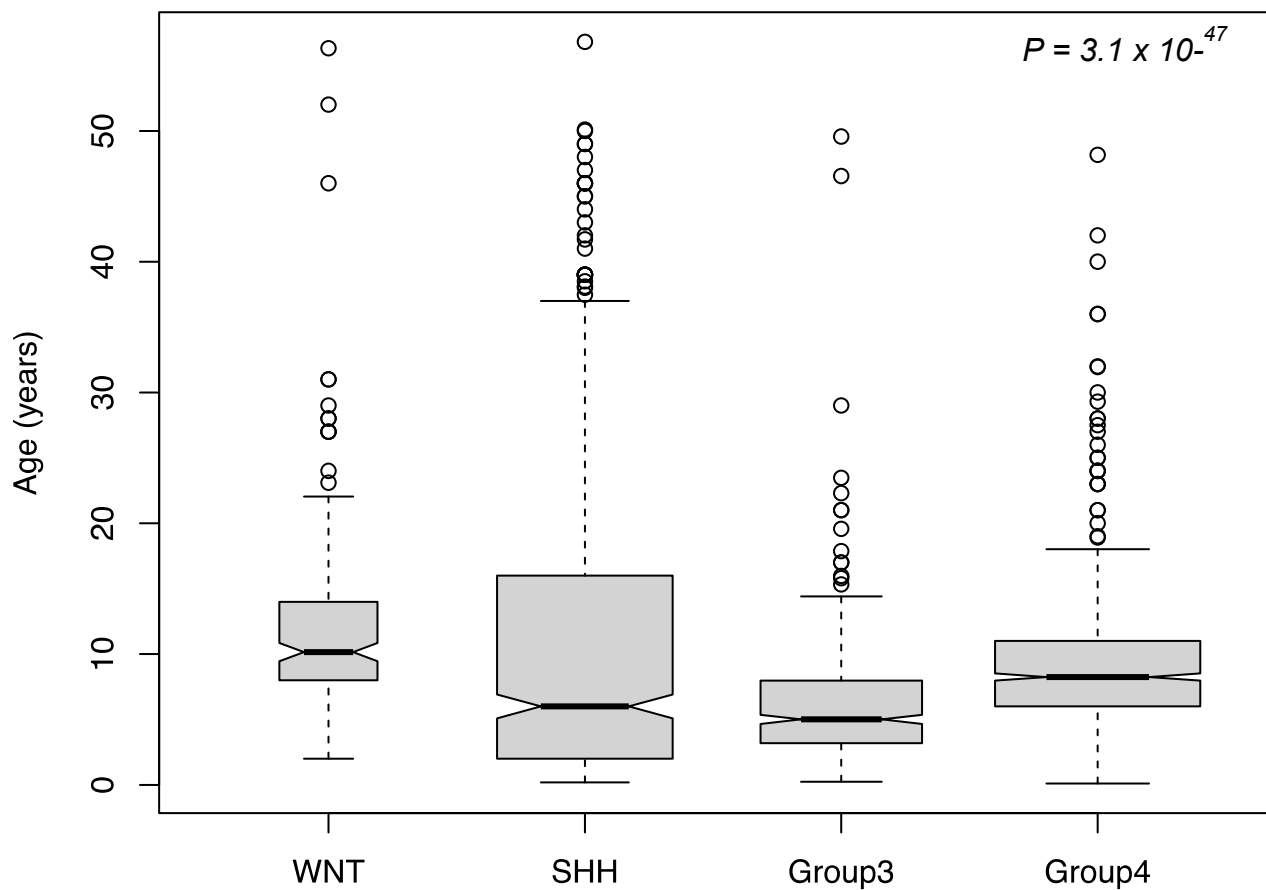

**Figure S4. Relationship between age and molecular subgroups in medulloblastoma patients.** Box plot describing the distribution of age across four molecular subgroups for medulloblastomas: WNT, SHH, Group 3 and Group 4. Kruskal-Wallis rank-sum test was used to assess the association between age and molecular subgroups.

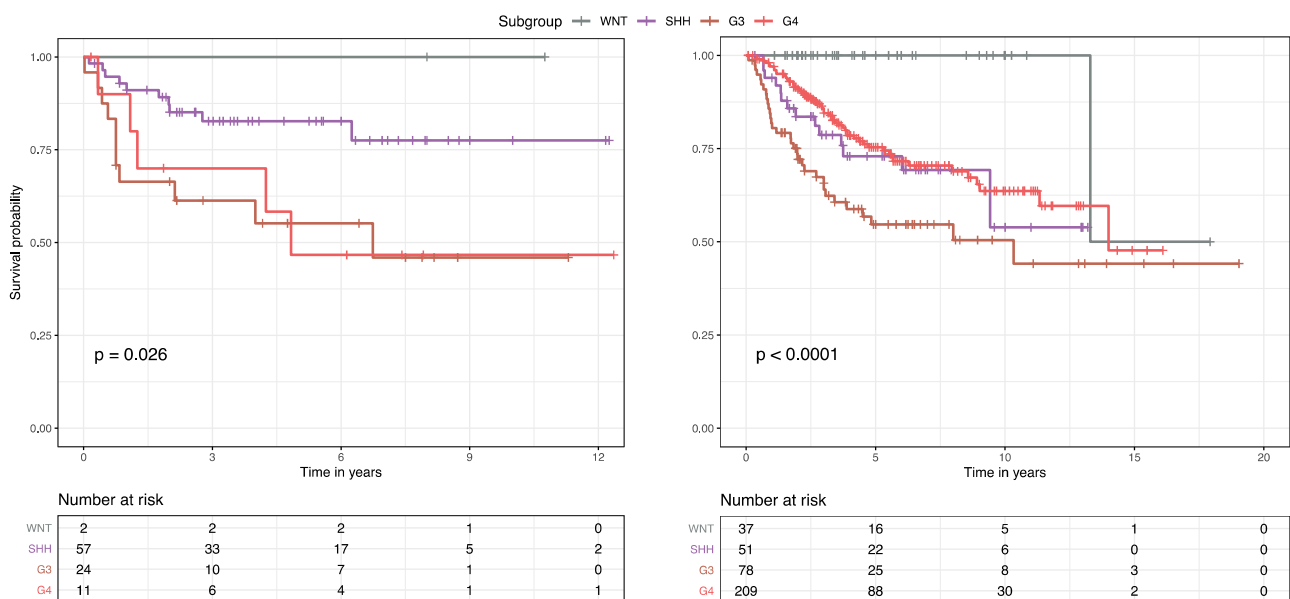

**Figure S5. Survival analysis by age groups.** The Kaplan-Meier survival curves of four molecular subgroups for medulloblastomas: WNT, SHH, Group 3 and Group 4 in Infants and Children patients.

**Table S1:** List of differentially expressed genes between TYA and other age groups

| Gene        | logFC | AveExpr | t     | P_Value  | FDR      |
|-------------|-------|---------|-------|----------|----------|
| RUNX3       | 0.53  | 5.84    | 7.27  | 9.17E-13 | 1.68E-08 |
| SERPIND1    | 0.56  | 4.96    | 6.35  | 3.69E-10 | 3.38E-06 |
| C9orf3      | 0.27  | 7.33    | 6.09  | 1.79E-09 | 1.09E-05 |
| LINC00476   | 0.23  | 6.10    | 5.73  | 1.51E-08 | 5.65E-05 |
| RPL39L      | -0.50 | 4.60    | -5.72 | 1.54E-08 | 5.65E-05 |
| EMID1       | 0.53  | 6.89    | 5.67  | 2.08E-08 | 6.36E-05 |
| GJD4        | 0.23  | 5.17    | 5.54  | 4.25E-08 | 1.07E-04 |
| XYLT2       | 0.24  | 6.75    | 5.52  | 4.67E-08 | 1.07E-04 |
| TPPP3       | 0.76  | 7.76    | 5.48  | 5.79E-08 | 1.14E-04 |
| PRSS23      | 0.34  | 5.51    | 5.47  | 6.22E-08 | 1.14E-04 |
| EIF2AK3     | -0.27 | 7.41    | -5.44 | 7.29E-08 | 1.21E-04 |
| DNAH9       | 0.25  | 5.04    | 5.42  | 8.25E-08 | 1.21E-04 |
| GPHN        | -0.43 | 9.51    | -5.38 | 9.82E-08 | 1.21E-04 |
| DNAH2       | 0.67  | 6.09    | 5.38  | 9.83E-08 | 1.21E-04 |
| ACOX2       | 0.40  | 6.05    | 5.38  | 9.91E-08 | 1.21E-04 |
| C3orf22     | 0.46  | 5.26    | 5.36  | 1.13E-07 | 1.28E-04 |
| PPP1R1B     | 0.49  | 6.80    | 5.35  | 1.21E-07 | 1.28E-04 |
| PIFO        | 0.46  | 4.62    | 5.34  | 1.25E-07 | 1.28E-04 |
| FBP2        | 0.31  | 3.92    | 5.29  | 1.65E-07 | 1.52E-04 |
| FRY         | -0.61 | 8.61    | -5.29 | 1.66E-07 | 1.52E-04 |
| WNK4        | 0.32  | 4.70    | 5.26  | 1.88E-07 | 1.64E-04 |
| THTPA       | 0.17  | 7.18    | 5.21  | 2.42E-07 | 2.00E-04 |
| FAM69A      | -0.53 | 7.16    | -5.21 | 2.51E-07 | 2.00E-04 |
| HOXA6       | 1.05  | 6.22    | 5.19  | 2.76E-07 | 2.11E-04 |
| FSTL5       | -1.26 | 7.63    | -5.13 | 3.72E-07 | 2.69E-04 |
| HOXA5       | 0.93  | 5.81    | 5.12  | 3.94E-07 | 2.69E-04 |
| OLFM2       | -0.63 | 9.48    | -5.12 | 3.96E-07 | 2.69E-04 |
| GPR78       | 0.46  | 5.36    | 5.10  | 4.42E-07 | 2.90E-04 |
| IQCA1       | 0.67  | 5.77    | 5.08  | 4.87E-07 | 3.08E-04 |
| FIGNL1      | -0.34 | 6.12    | -5.05 | 5.45E-07 | 3.33E-04 |
| TRIM59      | -0.46 | 5.24    | -5.04 | 5.93E-07 | 3.51E-04 |
| NMRAL1      | 0.34  | 6.87    | 5.00  | 7.19E-07 | 4.12E-04 |
| HOXA7       | 0.94  | 7.29    | 4.99  | 7.43E-07 | 4.13E-04 |
| MR1         | 0.35  | 5.82    | 4.98  | 7.87E-07 | 4.24E-04 |
| SLC17A5     | -0.22 | 7.48    | -4.95 | 9.19E-07 | 4.82E-04 |
| GRK6        | 0.17  | 7.47    | 4.93  | 1.02E-06 | 5.19E-04 |
| MDGA2       | -0.62 | 5.86    | -4.92 | 1.07E-06 | 5.28E-04 |
| SLCO1A2     | 0.60  | 4.65    | 4.91  | 1.11E-06 | 5.34E-04 |
| SLC13A5     | 0.30  | 5.66    | 4.91  | 1.14E-06 | 5.34E-04 |
| RABGAP1L    | -0.34 | 7.78    | -4.87 | 1.36E-06 | 6.25E-04 |
| C1orf228    | 0.29  | 6.30    | 4.86  | 1.46E-06 | 6.52E-04 |
| ADGRD2      | 0.34  | 5.93    | 4.84  | 1.57E-06 | 6.85E-04 |
| UROC1       | 0.29  | 4.57    | 4.82  | 1.76E-06 | 7.50E-04 |
| C1QTNF4     | -0.41 | 6.89    | -4.81 | 1.85E-06 | 7.69E-04 |
| C9orf40     | -0.15 | 7.02    | -4.79 | 2.00E-06 | 8.14E-04 |
| MAGEL2      | 0.34  | 5.27    | 4.78  | 2.14E-06 | 8.51E-04 |
| FADS3       | 0.30  | 6.97    | 4.77  | 2.20E-06 | 8.59E-04 |
| APC         | -0.29 | 8.35    | -4.76 | 2.35E-06 | 8.97E-04 |
| MAP3K14-AS1 | 0.20  | 5.44    | 4.75  | 2.41E-06 | 9.01E-04 |

|           |       |       |       |          |          |
|-----------|-------|-------|-------|----------|----------|
| CNTN1     | -0.87 | 9.45  | -4.74 | 2.53E-06 | 9.28E-04 |
| LPXN      | 0.19  | 7.44  | 4.71  | 2.95E-06 | 1.06E-03 |
| SIM2      | 0.35  | 5.08  | 4.70  | 3.04E-06 | 1.06E-03 |
| CADM2     | -0.74 | 7.26  | -4.70 | 3.06E-06 | 1.06E-03 |
| MCCC2     | 0.17  | 8.01  | 4.69  | 3.21E-06 | 1.06E-03 |
| PTTG2     | 0.27  | 4.71  | 4.69  | 3.21E-06 | 1.06E-03 |
| SEMA3B    | 0.28  | 5.99  | 4.69  | 3.24E-06 | 1.06E-03 |
| PPM1B     | -0.18 | 8.52  | -4.68 | 3.42E-06 | 1.08E-03 |
| LINC01296 | 0.54  | 6.82  | 4.68  | 3.42E-06 | 1.08E-03 |
| ADD3      | -0.25 | 7.99  | -4.67 | 3.52E-06 | 1.09E-03 |
| PAX3      | 0.88  | 5.36  | 4.67  | 3.62E-06 | 1.09E-03 |
| ARHGEF19  | 0.20  | 6.13  | 4.67  | 3.64E-06 | 1.09E-03 |
| TACR2     | 0.15  | 5.22  | 4.66  | 3.70E-06 | 1.10E-03 |
| HOXA4     | 0.76  | 4.83  | 4.66  | 3.80E-06 | 1.11E-03 |
| BOD1      | 0.17  | 8.96  | 4.65  | 4.00E-06 | 1.12E-03 |
| PPARG     | -0.33 | 5.46  | -4.65 | 4.01E-06 | 1.12E-03 |
| KLF9      | -0.29 | 6.91  | -4.65 | 4.02E-06 | 1.12E-03 |
| HEMK1     | 0.20  | 7.20  | 4.61  | 4.74E-06 | 1.29E-03 |
| SLITRK3   | -0.86 | 6.34  | -4.61 | 4.77E-06 | 1.29E-03 |
| MRVI1     | 0.35  | 5.66  | 4.59  | 5.24E-06 | 1.39E-03 |
| FAM71D    | -0.22 | 4.45  | -4.58 | 5.54E-06 | 1.45E-03 |
| LEF1      | 0.73  | 8.08  | 4.57  | 5.76E-06 | 1.49E-03 |
| TMEM74    | -0.37 | 7.00  | -4.55 | 6.28E-06 | 1.60E-03 |
| ACP6      | 0.28  | 6.87  | 4.53  | 6.76E-06 | 1.67E-03 |
| GPR19     | -0.34 | 6.99  | -4.53 | 6.80E-06 | 1.67E-03 |
| TOX3      | 0.57  | 8.76  | 4.53  | 6.84E-06 | 1.67E-03 |
| DNAH10    | 0.28  | 5.40  | 4.52  | 7.26E-06 | 1.75E-03 |
| PLCB2     | 0.25  | 6.30  | 4.50  | 7.73E-06 | 1.83E-03 |
| FOXF1     | 0.23  | 5.25  | 4.50  | 7.79E-06 | 1.83E-03 |
| MYCBPAP   | 0.29  | 5.25  | 4.50  | 7.94E-06 | 1.84E-03 |
| AKAP5     | -0.32 | 5.08  | -4.49 | 8.16E-06 | 1.85E-03 |
| LEO1      | -0.18 | 7.55  | -4.49 | 8.17E-06 | 1.85E-03 |
| CPZ       | 0.40  | 5.71  | 4.49  | 8.45E-06 | 1.89E-03 |
| BICD1     | -0.25 | 10.24 | -4.48 | 8.61E-06 | 1.90E-03 |
| PHLPP1    | -0.20 | 7.57  | -4.48 | 8.86E-06 | 1.92E-03 |
| TAOK3     | -0.33 | 7.97  | -4.47 | 9.02E-06 | 1.92E-03 |
| PNKP      | 0.15  | 7.68  | 4.46  | 9.28E-06 | 1.92E-03 |
| TBC1D8    | -0.45 | 7.50  | -4.46 | 9.29E-06 | 1.92E-03 |
| OVOS2     | 0.24  | 5.24  | 4.46  | 9.33E-06 | 1.92E-03 |
| KIFC3     | -0.25 | 6.05  | -4.46 | 9.38E-06 | 1.92E-03 |
| ZSCAN12   | -0.44 | 6.50  | -4.46 | 9.42E-06 | 1.92E-03 |
| PLPP5     | 0.25  | 8.63  | 4.45  | 9.77E-06 | 1.97E-03 |
| FZD2      | 0.31  | 7.07  | 4.45  | 9.93E-06 | 1.98E-03 |
| CFAP54    | 0.46  | 5.89  | 4.45  | 1.01E-05 | 1.99E-03 |
| DUOX2     | 0.24  | 4.78  | 4.44  | 1.03E-05 | 2.00E-03 |
| PRDM16    | 0.18  | 4.84  | 4.44  | 1.03E-05 | 2.00E-03 |
| TBC1D14   | 0.17  | 8.69  | 4.44  | 1.05E-05 | 2.00E-03 |
| ENO4      | 0.37  | 6.09  | 4.43  | 1.08E-05 | 2.04E-03 |
| MOGAT1    | 0.16  | 3.58  | 4.42  | 1.12E-05 | 2.04E-03 |
| COA4      | 0.15  | 6.91  | 4.42  | 1.12E-05 | 2.04E-03 |
| CECR6     | -0.20 | 7.23  | -4.42 | 1.12E-05 | 2.04E-03 |
| CACHD1    | 0.44  | 9.21  | 4.42  | 1.12E-05 | 2.04E-03 |
| KCTD8     | -0.31 | 6.12  | -4.42 | 1.16E-05 | 2.08E-03 |

|           |       |      |       |          |          |
|-----------|-------|------|-------|----------|----------|
| EFNA4     | 0.49  | 5.04 | 4.41  | 1.18E-05 | 2.10E-03 |
| GLB1L     | 0.16  | 6.41 | 4.40  | 1.24E-05 | 2.18E-03 |
| ENKUR     | 0.37  | 4.94 | 4.40  | 1.26E-05 | 2.18E-03 |
| LCNL1     | 0.35  | 6.13 | 4.40  | 1.26E-05 | 2.18E-03 |
| ING3      | -0.17 | 8.53 | -4.40 | 1.27E-05 | 2.18E-03 |
| REL       | -0.20 | 7.77 | -4.39 | 1.29E-05 | 2.19E-03 |
| WDR6      | 0.16  | 9.56 | 4.39  | 1.30E-05 | 2.19E-03 |
| CMIP      | 0.38  | 9.30 | 4.37  | 1.41E-05 | 2.36E-03 |
| LFNG      | 0.28  | 5.90 | 4.36  | 1.47E-05 | 2.43E-03 |
| GABARAPL1 | -0.48 | 8.11 | -4.35 | 1.54E-05 | 2.52E-03 |
| CFAP53    | 0.25  | 5.18 | 4.35  | 1.55E-05 | 2.52E-03 |
| CYP3A5    | 0.50  | 5.19 | 4.34  | 1.61E-05 | 2.53E-03 |
| LETMD1    | 0.13  | 9.14 | 4.34  | 1.61E-05 | 2.53E-03 |
| ATP2C1    | -0.20 | 8.54 | -4.34 | 1.62E-05 | 2.53E-03 |
| TRIM41    | 0.13  | 6.61 | 4.34  | 1.64E-05 | 2.53E-03 |
| LRRC53    | 0.30  | 3.62 | 4.34  | 1.64E-05 | 2.53E-03 |
| PLEKHO2   | 0.29  | 7.19 | 4.34  | 1.65E-05 | 2.53E-03 |
| PINK1-AS  | 0.18  | 6.26 | 4.34  | 1.65E-05 | 2.53E-03 |
| EYS       | -1.28 | 7.54 | -4.33 | 1.73E-05 | 2.62E-03 |
| POLR3H    | 0.14  | 7.62 | 4.32  | 1.75E-05 | 2.62E-03 |
| S100A16   | 0.42  | 6.97 | 4.32  | 1.75E-05 | 2.62E-03 |
| ATP2A3    | 0.54  | 6.26 | 4.32  | 1.80E-05 | 2.63E-03 |
| HIST1H4L  | -0.43 | 8.76 | -4.32 | 1.80E-05 | 2.63E-03 |
| HMG20B    | 0.31  | 8.41 | 4.32  | 1.81E-05 | 2.63E-03 |
| KIAA1191  | 0.14  | 9.79 | 4.31  | 1.88E-05 | 2.71E-03 |
| PAQR5     | 0.15  | 4.52 | 4.28  | 2.10E-05 | 3.00E-03 |
| ZC3H12A   | 0.15  | 6.18 | 4.28  | 2.11E-05 | 3.00E-03 |
| HOXA3     | 0.52  | 5.73 | 4.28  | 2.13E-05 | 3.00E-03 |
| SPG21     | 0.14  | 9.57 | 4.28  | 2.14E-05 | 3.00E-03 |
| TMEM27    | 0.20  | 5.02 | 4.27  | 2.25E-05 | 3.13E-03 |
| FANK1     | 0.24  | 5.20 | 4.26  | 2.36E-05 | 3.26E-03 |
| ACSL3     | -0.25 | 8.41 | -4.25 | 2.39E-05 | 3.28E-03 |
| PEX10     | 0.14  | 7.48 | 4.25  | 2.42E-05 | 3.28E-03 |
| CLDN11    | 0.60  | 7.51 | 4.25  | 2.46E-05 | 3.32E-03 |
| DIO3      | 0.21  | 5.15 | 4.24  | 2.51E-05 | 3.34E-03 |
| SYN2      | -0.53 | 7.83 | -4.24 | 2.53E-05 | 3.34E-03 |
| APOBEC3C  | 0.32  | 6.26 | 4.24  | 2.55E-05 | 3.34E-03 |
| APOBEC3G  | 0.19  | 4.27 | 4.24  | 2.55E-05 | 3.34E-03 |
| HAND2-AS1 | 0.61  | 4.79 | 4.23  | 2.59E-05 | 3.37E-03 |
| RASAL2    | -0.27 | 8.54 | -4.23 | 2.67E-05 | 3.45E-03 |
| SPATA24   | 0.14  | 5.22 | 4.22  | 2.75E-05 | 3.53E-03 |
| TDRD9     | -0.69 | 5.37 | -4.22 | 2.78E-05 | 3.53E-03 |
| MACROD2   | -0.39 | 6.67 | -4.21 | 2.86E-05 | 3.60E-03 |
| GUCY1A2   | -0.34 | 6.71 | -4.21 | 2.88E-05 | 3.60E-03 |
| SELENBP1  | 0.40  | 7.03 | 4.21  | 2.88E-05 | 3.60E-03 |
| LDLRAD4   | -0.47 | 7.21 | -4.20 | 2.94E-05 | 3.65E-03 |
| ITGA6     | 0.49  | 7.18 | 4.19  | 3.17E-05 | 3.90E-03 |
| S100A6    | 0.19  | 5.77 | 4.18  | 3.26E-05 | 3.99E-03 |
| ZNF154    | -0.61 | 7.76 | -4.17 | 3.36E-05 | 4.08E-03 |
| HMGN5     | -0.38 | 6.81 | -4.17 | 3.44E-05 | 4.15E-03 |
| SFRP5     | 0.58  | 5.82 | 4.17  | 3.47E-05 | 4.16E-03 |
| GRHL1     | -0.36 | 6.46 | -4.16 | 3.51E-05 | 4.17E-03 |
| SCD5      | -0.31 | 8.24 | -4.16 | 3.54E-05 | 4.17E-03 |

|          |       |       |       |          |          |
|----------|-------|-------|-------|----------|----------|
| MED28    | 0.15  | 8.87  | 4.16  | 3.55E-05 | 4.17E-03 |
| ATP6V0E1 | 0.17  | 9.87  | 4.16  | 3.58E-05 | 4.18E-03 |
| TEKT1    | 0.29  | 4.75  | 4.16  | 3.63E-05 | 4.22E-03 |
| PACRGL   | 0.16  | 9.03  | 4.15  | 3.72E-05 | 4.29E-03 |
| LIN28B   | -0.53 | 5.06  | -4.15 | 3.78E-05 | 4.34E-03 |
| DNAH6    | 0.31  | 5.79  | 4.14  | 3.82E-05 | 4.35E-03 |
| HIST1H3J | -0.41 | 6.56  | -4.14 | 3.86E-05 | 4.37E-03 |
| FGFR2    | 0.47  | 6.38  | 4.14  | 3.90E-05 | 4.38E-03 |
| EDEM3    | -0.16 | 8.19  | -4.13 | 4.07E-05 | 4.55E-03 |
| KSR2     | 0.33  | 5.91  | 4.12  | 4.15E-05 | 4.62E-03 |
| MAEA     | 0.13  | 8.54  | 4.12  | 4.23E-05 | 4.67E-03 |
| WNT11    | 0.34  | 5.39  | 4.10  | 4.52E-05 | 4.96E-03 |
| DIEXF    | 0.19  | 7.53  | 4.10  | 4.55E-05 | 4.97E-03 |
| SLC6A20  | 0.28  | 4.97  | 4.10  | 4.63E-05 | 5.02E-03 |
| KCNC2    | -0.73 | 6.91  | -4.10 | 4.66E-05 | 5.03E-03 |
| BTC      | -0.20 | 5.12  | -4.09 | 4.82E-05 | 5.17E-03 |
| PRSS12   | -0.72 | 7.50  | -4.08 | 4.92E-05 | 5.20E-03 |
| PPIE     | 0.18  | 7.07  | 4.08  | 4.92E-05 | 5.20E-03 |
| PRRG1    | -0.26 | 6.37  | -4.08 | 4.94E-05 | 5.20E-03 |
| HERC3    | -0.38 | 8.66  | -4.08 | 4.98E-05 | 5.21E-03 |
| ARNTL    | -0.39 | 6.23  | -4.08 | 5.00E-05 | 5.21E-03 |
| PCLO     | -0.56 | 7.66  | -4.08 | 5.09E-05 | 5.26E-03 |
| SLC35F3  | -0.55 | 7.24  | -4.08 | 5.10E-05 | 5.26E-03 |
| SERAC1   | -0.17 | 7.25  | -4.07 | 5.19E-05 | 5.31E-03 |
| ZDHHC1   | 0.19  | 7.07  | 4.07  | 5.23E-05 | 5.31E-03 |
| APP      | 0.37  | 11.36 | 4.07  | 5.24E-05 | 5.31E-03 |
| DNAJC5   | -0.15 | 7.65  | -4.07 | 5.32E-05 | 5.36E-03 |
| DISP1    | 0.17  | 7.21  | 4.06  | 5.36E-05 | 5.37E-03 |
| NEK3     | 0.28  | 7.18  | 4.05  | 5.70E-05 | 5.68E-03 |
| RARRES1  | 0.23  | 5.03  | 4.05  | 5.78E-05 | 5.73E-03 |
| MAATS1   | 0.32  | 5.50  | 4.04  | 5.95E-05 | 5.87E-03 |
| FBXW8    | 0.14  | 8.40  | 4.04  | 5.99E-05 | 5.87E-03 |
| DMD      | -0.54 | 7.15  | -4.03 | 6.17E-05 | 6.02E-03 |
| TTC28    | 0.18  | 9.37  | 4.03  | 6.28E-05 | 6.10E-03 |
| CALHM2   | 0.32  | 7.05  | 4.02  | 6.36E-05 | 6.14E-03 |
| DCBLD1   | -0.29 | 6.65  | -4.02 | 6.46E-05 | 6.18E-03 |
| ATP13A2  | -0.20 | 8.17  | -4.02 | 6.50E-05 | 6.18E-03 |
| ZNF702P  | -0.30 | 5.74  | -4.02 | 6.52E-05 | 6.18E-03 |
| SCP2     | -0.19 | 8.93  | -4.02 | 6.56E-05 | 6.18E-03 |
| CCDC30   | 0.25  | 6.80  | 4.01  | 6.57E-05 | 6.18E-03 |
| PTPRK    | 0.58  | 8.33  | 4.01  | 6.64E-05 | 6.21E-03 |
| YWHAH    | -0.19 | 9.46  | -4.01 | 6.73E-05 | 6.26E-03 |
| MRPS5    | -0.10 | 8.79  | -4.00 | 6.91E-05 | 6.40E-03 |
| IPCEF1   | -0.53 | 7.26  | -4.00 | 7.09E-05 | 6.53E-03 |
| DUOXA1   | 0.18  | 6.39  | 3.99  | 7.16E-05 | 6.56E-03 |
| SYNJ1    | -0.26 | 7.82  | -3.99 | 7.31E-05 | 6.66E-03 |
| GLCCI1   | -0.36 | 8.84  | -3.99 | 7.34E-05 | 6.66E-03 |
| YWHAB    | -0.22 | 9.95  | -3.99 | 7.42E-05 | 6.70E-03 |
| CCDC17   | 0.15  | 6.18  | 3.98  | 7.54E-05 | 6.78E-03 |
| CDH6     | -0.48 | 7.34  | -3.98 | 7.62E-05 | 6.81E-03 |
| SLC4A10  | -0.62 | 7.18  | -3.97 | 7.94E-05 | 7.06E-03 |
| SRRM4    | -0.27 | 9.32  | -3.96 | 8.06E-05 | 7.10E-03 |
| DLEC1    | 0.14  | 4.85  | 3.96  | 8.09E-05 | 7.10E-03 |

|           |       |       |       |          |          |
|-----------|-------|-------|-------|----------|----------|
| LIN7A     | -0.44 | 6.42  | -3.96 | 8.10E-05 | 7.10E-03 |
| TTC21A    | 0.22  | 6.11  | 3.96  | 8.24E-05 | 7.19E-03 |
| SFXN3     | -0.40 | 7.73  | -3.95 | 8.41E-05 | 7.29E-03 |
| ROCK2     | -0.20 | 9.14  | -3.95 | 8.44E-05 | 7.29E-03 |
| TCTN1     | 0.17  | 7.43  | 3.95  | 8.46E-05 | 7.29E-03 |
| KLHL31    | 0.12  | 5.06  | 3.95  | 8.56E-05 | 7.33E-03 |
| FAM78A    | -0.14 | 5.28  | -3.94 | 8.86E-05 | 7.56E-03 |
| ERBB2     | 0.19  | 6.91  | 3.94  | 8.97E-05 | 7.61E-03 |
| MFSD11    | -0.24 | 7.92  | -3.94 | 9.05E-05 | 7.64E-03 |
| C2orf81   | 0.18  | 6.04  | 3.94  | 9.08E-05 | 7.64E-03 |
| DKK2      | 0.75  | 5.22  | 3.93  | 9.15E-05 | 7.66E-03 |
| TKFC      | 0.17  | 7.57  | 3.93  | 9.22E-05 | 7.68E-03 |
| HCAR1     | 0.67  | 4.76  | 3.93  | 9.30E-05 | 7.71E-03 |
| RFX5      | 0.15  | 8.04  | 3.92  | 9.56E-05 | 7.90E-03 |
| LRP11     | -0.13 | 6.30  | -3.92 | 9.65E-05 | 7.94E-03 |
| MIR181B1  | -0.47 | 5.93  | -3.92 | 9.72E-05 | 7.96E-03 |
| PRNP      | -0.38 | 10.49 | -3.92 | 9.84E-05 | 8.02E-03 |
| MORN5     | 0.14  | 4.41  | 3.91  | 9.99E-05 | 8.06E-03 |
| KANSL2    | -0.13 | 7.74  | -3.91 | 9.99E-05 | 8.06E-03 |
| KAT2A     | 0.18  | 8.75  | 3.91  | 1.00E-04 | 8.06E-03 |
| SGK2      | 0.24  | 5.04  | 3.91  | 1.02E-04 | 8.14E-03 |
| EARS2     | 0.11  | 6.82  | 3.91  | 1.03E-04 | 8.14E-03 |
| PCYT1B    | 0.41  | 6.53  | 3.90  | 1.03E-04 | 8.14E-03 |
| CDKN1B    | -0.21 | 8.84  | -3.90 | 1.03E-04 | 8.14E-03 |
| NHP2      | 0.17  | 7.30  | 3.90  | 1.04E-04 | 8.14E-03 |
| CFAP52    | 0.12  | 4.41  | 3.90  | 1.04E-04 | 8.14E-03 |
| HCAR3     | 0.50  | 3.90  | 3.90  | 1.04E-04 | 8.14E-03 |
| B3GALT2   | -0.50 | 6.49  | -3.90 | 1.05E-04 | 8.15E-03 |
| ZBTB48    | 0.09  | 6.02  | 3.90  | 1.06E-04 | 8.19E-03 |
| RNVU1-3   | 0.39  | 5.22  | 3.90  | 1.06E-04 | 8.20E-03 |
| C11orf70  | 0.57  | 4.48  | 3.89  | 1.09E-04 | 8.38E-03 |
| CAMSAP3   | -0.45 | 7.67  | -3.89 | 1.10E-04 | 8.43E-03 |
| HDAC4     | 0.20  | 7.23  | 3.89  | 1.11E-04 | 8.44E-03 |
| DKKL1     | 0.20  | 5.46  | 3.88  | 1.12E-04 | 8.45E-03 |
| ARPP21    | -0.62 | 6.02  | -3.88 | 1.12E-04 | 8.45E-03 |
| LRRTM4    | -0.57 | 6.78  | -3.88 | 1.13E-04 | 8.45E-03 |
| CDC42EP4  | 0.25  | 7.03  | 3.88  | 1.13E-04 | 8.45E-03 |
| POMGNT1   | 0.13  | 8.20  | 3.88  | 1.13E-04 | 8.45E-03 |
| SPON1     | -0.52 | 8.40  | -3.88 | 1.14E-04 | 8.46E-03 |
| MAGI2     | -0.36 | 8.21  | -3.88 | 1.14E-04 | 8.46E-03 |
| ADGRB3    | -0.50 | 7.46  | -3.87 | 1.16E-04 | 8.56E-03 |
| UPP2      | -0.20 | 5.21  | -3.87 | 1.17E-04 | 8.56E-03 |
| EML5      | -0.41 | 7.44  | -3.87 | 1.17E-04 | 8.56E-03 |
| TNR       | -0.61 | 6.23  | -3.87 | 1.18E-04 | 8.56E-03 |
| PAPOLG    | -0.13 | 9.25  | -3.87 | 1.19E-04 | 8.56E-03 |
| FOXN2     | -0.19 | 7.88  | -3.87 | 1.19E-04 | 8.56E-03 |
| GPR179    | 0.16  | 5.10  | 3.86  | 1.22E-04 | 8.80E-03 |
| ALPL      | 0.39  | 6.41  | 3.86  | 1.24E-04 | 8.86E-03 |
| SLC45A2   | 0.24  | 5.28  | 3.86  | 1.24E-04 | 8.86E-03 |
| SPATA6L   | 0.27  | 5.99  | 3.86  | 1.25E-04 | 8.88E-03 |
| TNFRSF11B | 0.40  | 4.15  | 3.85  | 1.27E-04 | 9.01E-03 |
| COPA      | 0.12  | 10.71 | 3.85  | 1.31E-04 | 9.19E-03 |
| EIF5A2    | 0.32  | 6.13  | 3.85  | 1.31E-04 | 9.19E-03 |



|           |       |      |       |          |          |
|-----------|-------|------|-------|----------|----------|
| WIF1      | 0.88  | 5.14 | 3.84  | 1.36E-04 | 9.53E-03 |
| SLC25A23  | -0.17 | 6.90 | -3.83 | 1.37E-04 | 9.56E-03 |
| RAVER2    | 0.32  | 7.94 | 3.83  | 1.39E-04 | 9.60E-03 |
| HMGN4     | 0.14  | 8.95 | 3.83  | 1.39E-04 | 9.60E-03 |
| GPRC5C    | 0.23  | 5.86 | 3.83  | 1.39E-04 | 9.60E-03 |
| TNIP3     | -0.13 | 4.06 | -3.83 | 1.40E-04 | 9.62E-03 |
| ZNF804A   | -0.87 | 7.89 | -3.83 | 1.41E-04 | 9.62E-03 |
| PAPPA2    | -0.70 | 6.66 | -3.83 | 1.41E-04 | 9.63E-03 |
| LOC375196 | -0.11 | 5.34 | -3.82 | 1.43E-04 | 9.66E-03 |
| GABARAPL3 | -0.15 | 4.90 | -3.82 | 1.43E-04 | 9.66E-03 |
| NOCT      | -0.18 | 6.61 | -3.82 | 1.45E-04 | 9.73E-03 |
| USP12     | -0.13 | 7.33 | -3.82 | 1.45E-04 | 9.73E-03 |
| MARS      | -0.18 | 9.08 | -3.82 | 1.45E-04 | 9.73E-03 |
| FZD1      | -0.44 | 7.50 | -3.82 | 1.47E-04 | 9.80E-03 |
| AP1S2     | -0.26 | 6.15 | -3.81 | 1.48E-04 | 9.83E-03 |
| HSPA4L    | -0.26 | 9.18 | -3.81 | 1.49E-04 | 9.87E-03 |
| OGFRL1    | -0.32 | 8.37 | -3.81 | 1.51E-04 | 9.94E-03 |
| PRPS2     | 0.30  | 7.79 | 3.81  | 1.52E-04 | 1.00E-02 |
| HCN1      | -0.66 | 7.70 | -3.81 | 1.53E-04 | 1.00E-02 |
| LYST      | -0.21 | 8.86 | -3.80 | 1.56E-04 | 1.02E-02 |
| AKR7A3    | 0.13  | 7.68 | 3.80  | 1.58E-04 | 1.02E-02 |
| RILPL2    | 0.25  | 6.79 | 3.80  | 1.58E-04 | 1.02E-02 |
| PHTF2     | -0.14 | 8.40 | -3.80 | 1.59E-04 | 1.02E-02 |
| PTPRZ1    | -0.77 | 8.26 | -3.80 | 1.59E-04 | 1.02E-02 |
| HOXA2     | 0.72  | 5.45 | 3.80  | 1.60E-04 | 1.02E-02 |
| YAP1      | 0.40  | 7.33 | 3.80  | 1.60E-04 | 1.02E-02 |
| NIPAL1    | -0.23 | 5.08 | -3.79 | 1.60E-04 | 1.02E-02 |
| Sep-08    | -0.24 | 8.46 | -3.79 | 1.61E-04 | 1.02E-02 |
| HIST1H4F  | -0.44 | 6.57 | -3.79 | 1.62E-04 | 1.02E-02 |
| DUSP8     | -0.25 | 8.24 | -3.79 | 1.63E-04 | 1.03E-02 |
| COL27A1   | -0.53 | 7.78 | -3.79 | 1.64E-04 | 1.03E-02 |
| NADSYN1   | 0.15  | 7.07 | 3.79  | 1.64E-04 | 1.03E-02 |
| ARMT1     | -0.18 | 6.95 | -3.79 | 1.65E-04 | 1.03E-02 |
| NKAPL     | -0.33 | 5.18 | -3.78 | 1.67E-04 | 1.04E-02 |
| RAB36     | 0.31  | 6.67 | 3.78  | 1.68E-04 | 1.04E-02 |
| NBPF3     | 0.15  | 6.93 | 3.78  | 1.68E-04 | 1.04E-02 |
| RAB34     | 0.34  | 7.25 | 3.78  | 1.70E-04 | 1.04E-02 |
| TTC7A     | 0.13  | 6.19 | 3.78  | 1.70E-04 | 1.04E-02 |
| ACTC1     | 0.76  | 7.02 | 3.78  | 1.70E-04 | 1.04E-02 |
| KIAA0141  | 0.14  | 8.02 | 3.77  | 1.74E-04 | 1.06E-02 |
| KREMEN1   | 0.35  | 6.98 | 3.77  | 1.75E-04 | 1.06E-02 |
| FAM207A   | 0.18  | 7.28 | 3.77  | 1.78E-04 | 1.07E-02 |
| PARN      | 0.11  | 8.73 | 3.77  | 1.79E-04 | 1.07E-02 |
| CSRNP3    | -0.46 | 8.49 | -3.77 | 1.79E-04 | 1.07E-02 |
| C20orf27  | 0.18  | 5.70 | 3.77  | 1.79E-04 | 1.07E-02 |
| SPACA9    | 0.15  | 5.94 | 3.77  | 1.79E-04 | 1.07E-02 |
| TMEM43    | 0.13  | 9.21 | 3.76  | 1.80E-04 | 1.07E-02 |
| RSPO4     | 0.21  | 5.33 | 3.76  | 1.80E-04 | 1.07E-02 |
| RNF135    | 0.17  | 6.98 | 3.76  | 1.81E-04 | 1.07E-02 |
| ACSF2     | 0.29  | 4.62 | 3.76  | 1.81E-04 | 1.07E-02 |
| RBP1      | 0.47  | 7.56 | 3.76  | 1.82E-04 | 1.07E-02 |
| MEMO1     | -0.11 | 7.32 | -3.76 | 1.85E-04 | 1.08E-02 |
| PHYKPL    | 0.16  | 7.53 | 3.75  | 1.89E-04 | 1.10E-02 |

|            |       |       |       |          |          |
|------------|-------|-------|-------|----------|----------|
| PDZRN3     | 0.56  | 6.44  | 3.75  | 1.89E-04 | 1.10E-02 |
| RIOX1      | -0.20 | 6.93  | -3.75 | 1.89E-04 | 1.10E-02 |
| DCAF8      | 0.10  | 7.84  | 3.75  | 1.90E-04 | 1.10E-02 |
| IGF2BP3    | -0.73 | 6.48  | -3.75 | 1.91E-04 | 1.10E-02 |
| ATP7B      | -0.20 | 7.01  | -3.75 | 1.92E-04 | 1.10E-02 |
| CCND1      | 0.37  | 7.06  | 3.75  | 1.93E-04 | 1.10E-02 |
| PCDHB9     | 0.35  | 10.20 | 3.75  | 1.93E-04 | 1.10E-02 |
| TCERG1L    | 0.44  | 6.83  | 3.74  | 1.98E-04 | 1.12E-02 |
| BTBD10     | -0.16 | 9.15  | -3.74 | 1.98E-04 | 1.12E-02 |
| NEO1       | -0.23 | 9.66  | -3.74 | 2.00E-04 | 1.13E-02 |
| ERLIN2     | 0.16  | 6.56  | 3.74  | 2.02E-04 | 1.14E-02 |
| CLIC3      | 0.11  | 5.06  | 3.73  | 2.04E-04 | 1.14E-02 |
| FURIN      | -0.13 | 6.72  | -3.73 | 2.04E-04 | 1.14E-02 |
| TRMT2A     | 0.11  | 7.23  | 3.73  | 2.05E-04 | 1.14E-02 |
| PCGF5      | 0.40  | 6.31  | 3.73  | 2.05E-04 | 1.14E-02 |
| PTGER2     | -0.58 | 5.91  | -3.73 | 2.07E-04 | 1.15E-02 |
| SCRT2      | -0.29 | 6.92  | -3.73 | 2.07E-04 | 1.15E-02 |
| EPS8       | -0.32 | 9.48  | -3.72 | 2.11E-04 | 1.16E-02 |
| TMEM51-AS1 | 0.51  | 5.01  | 3.72  | 2.11E-04 | 1.16E-02 |
| MRPS21     | 0.11  | 10.64 | 3.72  | 2.16E-04 | 1.19E-02 |
| PKP2       | 0.41  | 6.64  | 3.72  | 2.18E-04 | 1.19E-02 |
| BOD1L2     | 0.14  | 5.62  | 3.72  | 2.19E-04 | 1.19E-02 |
| THEGL      | 0.15  | 4.86  | 3.71  | 2.19E-04 | 1.19E-02 |
| CD72       | 0.17  | 5.58  | 3.71  | 2.21E-04 | 1.20E-02 |
| ANAPC5     | 0.11  | 9.23  | 3.71  | 2.21E-04 | 1.20E-02 |
| PLD2       | 0.37  | 7.29  | 3.71  | 2.25E-04 | 1.22E-02 |
| OR2L8      | -0.76 | 6.68  | -3.70 | 2.28E-04 | 1.22E-02 |
| POFUT2     | 0.12  | 6.48  | 3.70  | 2.28E-04 | 1.22E-02 |
| PAAF1      | 0.15  | 7.48  | 3.70  | 2.28E-04 | 1.22E-02 |
| PTPRF      | -0.30 | 7.73  | -3.70 | 2.30E-04 | 1.23E-02 |
| CHIA       | 0.09  | 3.66  | 3.70  | 2.33E-04 | 1.24E-02 |
| TMEM98     | 0.37  | 8.27  | 3.70  | 2.34E-04 | 1.24E-02 |
| TMEM51     | 0.49  | 5.36  | 3.69  | 2.37E-04 | 1.25E-02 |
| NAALAD2    | -0.46 | 4.79  | -3.69 | 2.37E-04 | 1.25E-02 |
| P3H4       | 0.13  | 6.46  | 3.69  | 2.39E-04 | 1.25E-02 |
| TANGO6     | -0.24 | 7.66  | -3.69 | 2.39E-04 | 1.25E-02 |
| ZNF576     | 0.10  | 5.82  | 3.69  | 2.40E-04 | 1.25E-02 |
| GLRA4      | 0.35  | 5.36  | 3.69  | 2.40E-04 | 1.25E-02 |
| AKR7L      | 0.13  | 6.03  | 3.69  | 2.40E-04 | 1.25E-02 |
| CDNF       | 0.18  | 6.60  | 3.69  | 2.42E-04 | 1.26E-02 |
| ATAD2B     | -0.14 | 8.48  | -3.69 | 2.44E-04 | 1.26E-02 |
| SCLT1      | -0.16 | 7.85  | -3.69 | 2.45E-04 | 1.26E-02 |
| USP49      | -0.23 | 7.89  | -3.68 | 2.46E-04 | 1.26E-02 |
| TESK2      | -0.33 | 6.92  | -3.68 | 2.47E-04 | 1.26E-02 |
| ABCG4      | -0.40 | 6.97  | -3.68 | 2.49E-04 | 1.27E-02 |
| SGK1       | -0.60 | 8.18  | -3.68 | 2.51E-04 | 1.27E-02 |
| LRP2       | -0.55 | 5.00  | -3.68 | 2.52E-04 | 1.27E-02 |
| DYNLRB2    | 0.14  | 3.87  | 3.68  | 2.52E-04 | 1.27E-02 |
| HCFC2      | -0.27 | 7.77  | -3.68 | 2.52E-04 | 1.27E-02 |
| CACNA2D1   | -0.58 | 10.53 | -3.67 | 2.56E-04 | 1.29E-02 |
| APH1B      | 0.23  | 6.79  | 3.67  | 2.58E-04 | 1.29E-02 |
| CDKL5      | -0.23 | 8.15  | -3.67 | 2.58E-04 | 1.29E-02 |
| NFAM1      | 0.17  | 6.15  | 3.67  | 2.59E-04 | 1.29E-02 |

|             |       |      |       |          |          |
|-------------|-------|------|-------|----------|----------|
| SPINK1      | -0.08 | 3.31 | -3.67 | 2.60E-04 | 1.29E-02 |
| LINC00282   | -0.23 | 5.87 | -3.67 | 2.60E-04 | 1.29E-02 |
| TMEM45A     | 0.46  | 5.27 | 3.67  | 2.64E-04 | 1.30E-02 |
| SLC8A1      | -0.52 | 7.81 | -3.67 | 2.64E-04 | 1.30E-02 |
| AMPH        | -0.42 | 7.64 | -3.66 | 2.72E-04 | 1.34E-02 |
| NECAP2      | 0.11  | 7.88 | 3.66  | 2.72E-04 | 1.34E-02 |
| PTGS2       | -0.38 | 5.90 | -3.66 | 2.74E-04 | 1.34E-02 |
| HSD17B3     | 0.29  | 5.60 | 3.66  | 2.75E-04 | 1.34E-02 |
| KLHL29      | -0.33 | 7.22 | -3.65 | 2.77E-04 | 1.35E-02 |
| ANKS6       | 0.25  | 6.74 | 3.65  | 2.79E-04 | 1.36E-02 |
| NEK8        | 0.11  | 5.54 | 3.65  | 2.84E-04 | 1.38E-02 |
| LRRC18      | 0.36  | 5.10 | 3.64  | 2.87E-04 | 1.39E-02 |
| MCF2L2      | -0.45 | 6.41 | -3.64 | 2.89E-04 | 1.39E-02 |
| SHOX2       | 0.77  | 6.42 | 3.64  | 2.90E-04 | 1.40E-02 |
| MACROD2-IT1 | -0.32 | 5.07 | -3.64 | 2.93E-04 | 1.40E-02 |
| DIRAS2      | -0.57 | 7.91 | -3.64 | 2.93E-04 | 1.40E-02 |
| SPATA2      | -0.13 | 6.81 | -3.63 | 2.98E-04 | 1.42E-02 |
| FBN3        | -0.48 | 6.95 | -3.63 | 2.99E-04 | 1.42E-02 |
| CERS2       | 0.16  | 9.19 | 3.63  | 2.99E-04 | 1.42E-02 |
| LINC01547   | 0.12  | 6.26 | 3.63  | 3.03E-04 | 1.43E-02 |
| FBXO3       | -0.15 | 8.97 | -3.63 | 3.09E-04 | 1.46E-02 |
| TBX5        | 0.58  | 5.91 | 3.62  | 3.11E-04 | 1.46E-02 |
| RASL10A     | 0.17  | 5.53 | 3.62  | 3.11E-04 | 1.46E-02 |
| TRIM68      | -0.20 | 7.81 | -3.62 | 3.12E-04 | 1.46E-02 |
| P2RX6       | 0.20  | 5.16 | 3.62  | 3.16E-04 | 1.47E-02 |
| THNSL1      | 0.19  | 7.22 | 3.62  | 3.16E-04 | 1.47E-02 |
| RUNX2       | 0.48  | 6.16 | 3.62  | 3.21E-04 | 1.49E-02 |
| IFT80       | 0.23  | 7.85 | 3.61  | 3.24E-04 | 1.51E-02 |
| GRASP       | 0.31  | 6.07 | 3.61  | 3.26E-04 | 1.51E-02 |
| SORBS2      | -0.51 | 7.98 | -3.61 | 3.28E-04 | 1.52E-02 |
| PLA2G4C     | -0.38 | 5.41 | -3.60 | 3.34E-04 | 1.54E-02 |
| SPRYD7      | -0.17 | 8.12 | -3.60 | 3.36E-04 | 1.54E-02 |
| TSC22D3     | 0.27  | 7.96 | 3.60  | 3.42E-04 | 1.56E-02 |
| BRINP3      | -0.61 | 5.36 | -3.60 | 3.42E-04 | 1.56E-02 |
| LOC440700   | 0.18  | 3.93 | 3.60  | 3.43E-04 | 1.57E-02 |
| CTRL        | 0.16  | 6.19 | 3.60  | 3.45E-04 | 1.57E-02 |
| HCAR2       | 0.42  | 4.77 | 3.59  | 3.49E-04 | 1.58E-02 |
| PCDHB10     | 0.27  | 8.89 | 3.59  | 3.52E-04 | 1.59E-02 |
| GNPTG       | 0.10  | 8.04 | 3.59  | 3.53E-04 | 1.59E-02 |
| PDE6H       | -0.50 | 5.23 | -3.59 | 3.56E-04 | 1.61E-02 |
| TBC1D1      | 0.22  | 8.67 | 3.58  | 3.61E-04 | 1.62E-02 |
| CYB5R2      | 0.39  | 5.25 | 3.58  | 3.68E-04 | 1.65E-02 |
| BAGE4       | -0.12 | 8.28 | -3.58 | 3.72E-04 | 1.67E-02 |
| HMGCR       | -0.15 | 9.06 | -3.58 | 3.73E-04 | 1.67E-02 |
| PHYHIPL     | -0.29 | 9.17 | -3.57 | 3.77E-04 | 1.68E-02 |
| MADD        | -0.16 | 9.85 | -3.57 | 3.78E-04 | 1.68E-02 |
| FAM86JP     | 0.12  | 6.74 | 3.57  | 3.80E-04 | 1.68E-02 |
| SLC5A8      | -0.36 | 3.81 | -3.57 | 3.82E-04 | 1.69E-02 |
| TSPYL5      | -0.50 | 7.93 | -3.57 | 3.84E-04 | 1.69E-02 |
| INTS11      | 0.11  | 8.38 | 3.57  | 3.87E-04 | 1.70E-02 |
| VGLL4       | 0.14  | 7.51 | 3.56  | 3.89E-04 | 1.70E-02 |
| IL7R        | 0.22  | 4.59 | 3.56  | 3.89E-04 | 1.70E-02 |
| MRTO4       | 0.16  | 6.67 | 3.56  | 3.93E-04 | 1.72E-02 |

|          |       |      |       |          |          |
|----------|-------|------|-------|----------|----------|
| IDI1     | -0.17 | 8.70 | -3.56 | 3.95E-04 | 1.72E-02 |
| CLDN2    | 0.11  | 4.60 | 3.56  | 3.98E-04 | 1.73E-02 |
| DOCK3    | -0.48 | 7.87 | -3.56 | 3.99E-04 | 1.73E-02 |
| PSMB10   | 0.19  | 6.66 | 3.55  | 4.04E-04 | 1.75E-02 |
| BEX5     | -0.24 | 5.48 | -3.55 | 4.06E-04 | 1.75E-02 |
| MDH1B    | 0.24  | 5.31 | 3.55  | 4.08E-04 | 1.76E-02 |
| SLC6A17  | -0.50 | 5.84 | -3.55 | 4.16E-04 | 1.78E-02 |
| INTS6    | -0.12 | 6.95 | -3.54 | 4.18E-04 | 1.79E-02 |
| DYDC2    | 0.10  | 4.57 | 3.54  | 4.19E-04 | 1.79E-02 |
| COG7     | 0.11  | 7.87 | 3.54  | 4.21E-04 | 1.80E-02 |
| TWIST2   | 0.30  | 5.37 | 3.54  | 4.23E-04 | 1.80E-02 |
| CBLN1    | -0.50 | 8.03 | -3.54 | 4.27E-04 | 1.81E-02 |
| ALK      | 0.53  | 5.95 | 3.54  | 4.32E-04 | 1.83E-02 |
| CLN3     | 0.12  | 7.09 | 3.54  | 4.33E-04 | 1.83E-02 |
| UGP2     | -0.18 | 7.77 | -3.53 | 4.40E-04 | 1.86E-02 |
| EHMT1    | 0.12  | 8.02 | 3.53  | 4.48E-04 | 1.88E-02 |
| CACNB2   | -0.39 | 6.91 | -3.52 | 4.51E-04 | 1.89E-02 |
| ARAP3    | 0.29  | 6.69 | 3.52  | 4.54E-04 | 1.90E-02 |
| KIAA1147 | -0.24 | 9.09 | -3.52 | 4.57E-04 | 1.91E-02 |
| MYLK2    | 0.28  | 5.69 | 3.52  | 4.58E-04 | 1.91E-02 |
| METTTL26 | 0.12  | 7.09 | 3.52  | 4.61E-04 | 1.91E-02 |
| RPS6KL1  | -0.28 | 7.19 | -3.52 | 4.61E-04 | 1.91E-02 |
| SYCP1    | -0.58 | 3.71 | -3.52 | 4.62E-04 | 1.91E-02 |
| CMTM5    | 0.33  | 5.35 | 3.51  | 4.68E-04 | 1.93E-02 |
| MIR135A2 | 0.27  | 2.85 | 3.51  | 4.69E-04 | 1.93E-02 |
| CHRM5    | -0.19 | 5.19 | -3.51 | 4.70E-04 | 1.93E-02 |
| KCNIP2   | -0.35 | 7.40 | -3.51 | 4.72E-04 | 1.94E-02 |
| KIAA0513 | -0.28 | 7.27 | -3.50 | 4.99E-04 | 2.04E-02 |
| CLDN16   | 0.13  | 4.38 | 3.50  | 5.00E-04 | 2.04E-02 |
| SHISA7   | -0.26 | 5.10 | -3.50 | 5.01E-04 | 2.04E-02 |
| HMGCL    | 0.13  | 6.41 | 3.49  | 5.04E-04 | 2.05E-02 |
| FIGN     | -0.48 | 5.68 | -3.49 | 5.09E-04 | 2.06E-02 |
| RSPH6A   | 0.08  | 5.66 | 3.49  | 5.10E-04 | 2.06E-02 |
| LMNB1    | -0.20 | 8.45 | -3.49 | 5.15E-04 | 2.08E-02 |
| SMYD5    | 0.11  | 7.49 | 3.49  | 5.19E-04 | 2.09E-02 |
| PRSS53   | -0.12 | 5.90 | -3.49 | 5.19E-04 | 2.09E-02 |
| CNGA1    | -0.35 | 4.26 | -3.49 | 5.20E-04 | 2.09E-02 |
| GPD1L    | -0.25 | 5.81 | -3.48 | 5.23E-04 | 2.09E-02 |
| VPS13A   | -0.25 | 6.87 | -3.48 | 5.25E-04 | 2.10E-02 |
| ZMAT5    | 0.11  | 6.85 | 3.48  | 5.28E-04 | 2.11E-02 |
| GNG8     | 0.19  | 5.90 | 3.48  | 5.32E-04 | 2.12E-02 |
| ACKR3    | 0.22  | 4.52 | 3.48  | 5.34E-04 | 2.12E-02 |
| NOS1AP   | -0.29 | 6.96 | -3.48 | 5.34E-04 | 2.12E-02 |
| TRHDE    | -0.55 | 5.41 | -3.48 | 5.36E-04 | 2.12E-02 |
| DCTD     | 0.22  | 8.91 | 3.48  | 5.39E-04 | 2.12E-02 |
| CBY1     | 0.11  | 7.12 | 3.48  | 5.40E-04 | 2.12E-02 |
| PPP3R1   | -0.13 | 8.95 | -3.47 | 5.44E-04 | 2.13E-02 |
| SCGB2B2  | 0.26  | 6.56 | 3.47  | 5.44E-04 | 2.13E-02 |
| PLA2G6   | 0.16  | 7.10 | 3.47  | 5.46E-04 | 2.13E-02 |
| TCTN3    | 0.15  | 8.40 | 3.47  | 5.46E-04 | 2.13E-02 |
| CCDC113  | 0.26  | 6.97 | 3.47  | 5.48E-04 | 2.13E-02 |
| JAK1     | 0.11  | 9.48 | 3.47  | 5.50E-04 | 2.14E-02 |
| SNTB2    | -0.27 | 8.17 | -3.47 | 5.52E-04 | 2.14E-02 |

|           |       |       |       |          |          |
|-----------|-------|-------|-------|----------|----------|
| SMAP1     | -0.15 | 8.83  | -3.47 | 5.54E-04 | 2.14E-02 |
| TIPARP    | -0.18 | 7.93  | -3.47 | 5.57E-04 | 2.14E-02 |
| LINC01124 | 0.32  | 4.66  | 3.47  | 5.59E-04 | 2.14E-02 |
| ST3GAL6   | -0.31 | 7.20  | -3.47 | 5.59E-04 | 2.14E-02 |
| NRSN1     | -0.38 | 6.89  | -3.47 | 5.60E-04 | 2.14E-02 |
| GDPD5     | -0.28 | 7.02  | -3.47 | 5.60E-04 | 2.14E-02 |
| LPIN3     | 0.14  | 4.99  | 3.47  | 5.61E-04 | 2.14E-02 |
| STXBP5    | -0.21 | 8.19  | -3.47 | 5.61E-04 | 2.14E-02 |
| MLST8     | 0.11  | 7.84  | 3.46  | 5.62E-04 | 2.14E-02 |
| ARID3A    | -0.13 | 5.97  | -3.46 | 5.64E-04 | 2.14E-02 |
| CEP68     | 0.16  | 8.33  | 3.46  | 5.66E-04 | 2.14E-02 |
| EVC       | 0.42  | 6.49  | 3.46  | 5.71E-04 | 2.16E-02 |
| ESRRB     | 0.39  | 5.17  | 3.46  | 5.77E-04 | 2.18E-02 |
| HPD       | 0.17  | 4.28  | 3.46  | 5.78E-04 | 2.18E-02 |
| H6PD      | 0.15  | 6.41  | 3.46  | 5.82E-04 | 2.19E-02 |
| USP2      | -0.54 | 7.58  | -3.45 | 5.83E-04 | 2.19E-02 |
| F12       | 0.10  | 5.39  | 3.45  | 5.86E-04 | 2.19E-02 |
| ALDH5A1   | -0.27 | 7.19  | -3.45 | 5.88E-04 | 2.20E-02 |
| SLC25A16  | -0.11 | 7.20  | -3.45 | 6.02E-04 | 2.24E-02 |
| CASP8AP2  | -0.14 | 8.00  | -3.45 | 6.03E-04 | 2.24E-02 |
| RCAN1     | -0.19 | 6.63  | -3.44 | 6.05E-04 | 2.25E-02 |
| MMEL1     | 0.10  | 4.35  | 3.44  | 6.10E-04 | 2.25E-02 |
| NOL3      | 0.16  | 7.14  | 3.44  | 6.11E-04 | 2.25E-02 |
| PAX5      | 0.48  | 7.07  | 3.44  | 6.11E-04 | 2.25E-02 |
| METTTL13  | 0.14  | 7.33  | 3.44  | 6.12E-04 | 2.25E-02 |
| CELF1     | -0.10 | 9.86  | -3.44 | 6.13E-04 | 2.25E-02 |
| NQO1      | 0.24  | 6.07  | 3.44  | 6.16E-04 | 2.26E-02 |
| PDE9A     | -0.31 | 8.66  | -3.44 | 6.22E-04 | 2.28E-02 |
| OSCP1     | 0.15  | 6.66  | 3.44  | 6.24E-04 | 2.28E-02 |
| ZFAND4    | -0.23 | 7.66  | -3.44 | 6.25E-04 | 2.28E-02 |
| ZNF346    | 0.10  | 7.72  | 3.43  | 6.31E-04 | 2.29E-02 |
| CDS2      | -0.12 | 9.75  | -3.43 | 6.33E-04 | 2.29E-02 |
| HHLA2     | 0.16  | 3.68  | 3.43  | 6.34E-04 | 2.29E-02 |
| DMC1      | -0.24 | 3.72  | -3.43 | 6.38E-04 | 2.29E-02 |
| GABRA5    | -0.71 | 6.62  | -3.43 | 6.38E-04 | 2.29E-02 |
| CRYZ      | 0.39  | 8.28  | 3.43  | 6.39E-04 | 2.29E-02 |
| PRPH2     | -0.63 | 6.31  | -3.43 | 6.39E-04 | 2.29E-02 |
| MYO15B    | 0.31  | 7.03  | 3.43  | 6.40E-04 | 2.29E-02 |
| NEUROD1   | -0.49 | 10.28 | -3.43 | 6.43E-04 | 2.30E-02 |
| GNAI2     | 0.17  | 9.17  | 3.43  | 6.47E-04 | 2.31E-02 |
| LDHA      | -0.28 | 10.55 | -3.43 | 6.47E-04 | 2.31E-02 |
| TBC1D26   | 0.21  | 5.56  | 3.43  | 6.48E-04 | 2.31E-02 |
| ZNF480    | 0.13  | 8.62  | 3.42  | 6.56E-04 | 2.33E-02 |
| SESTD1    | -0.16 | 9.22  | -3.42 | 6.61E-04 | 2.34E-02 |
| DTNB      | -0.16 | 8.35  | -3.42 | 6.62E-04 | 2.34E-02 |
| TEX2      | -0.29 | 8.48  | -3.42 | 6.65E-04 | 2.34E-02 |
| MYCBP2    | -0.18 | 9.14  | -3.42 | 6.65E-04 | 2.34E-02 |
| TDRD12    | 0.19  | 4.14  | 3.42  | 6.67E-04 | 2.35E-02 |
| ENC1      | -0.61 | 8.28  | -3.42 | 6.70E-04 | 2.35E-02 |
| ATXN7     | -0.20 | 10.33 | -3.41 | 6.75E-04 | 2.37E-02 |
| MAP3K11   | 0.12  | 7.10  | 3.41  | 6.77E-04 | 2.37E-02 |
| SERPINF2  | 0.19  | 5.34  | 3.41  | 6.82E-04 | 2.38E-02 |
| LTA4H     | 0.18  | 8.89  | 3.41  | 6.82E-04 | 2.38E-02 |

|           |       |       |       |          |          |
|-----------|-------|-------|-------|----------|----------|
| C9orf50   | 0.09  | 4.78  | 3.41  | 6.83E-04 | 2.38E-02 |
| SHROOM1   | 0.09  | 6.27  | 3.41  | 6.92E-04 | 2.40E-02 |
| BMP8B     | 0.24  | 5.46  | 3.40  | 7.00E-04 | 2.42E-02 |
| DNAH5     | 0.26  | 4.97  | 3.40  | 7.00E-04 | 2.42E-02 |
| EPHA6     | -0.62 | 5.90  | -3.40 | 7.02E-04 | 2.42E-02 |
| IRF3      | 0.14  | 6.86  | 3.40  | 7.08E-04 | 2.44E-02 |
| DUOX1     | 0.25  | 5.70  | 3.40  | 7.22E-04 | 2.48E-02 |
| C14orf79  | 0.13  | 6.22  | 3.40  | 7.22E-04 | 2.48E-02 |
| Sep-06    | -0.30 | 9.26  | -3.40 | 7.23E-04 | 2.48E-02 |
| MYT1L     | -0.55 | 9.32  | -3.39 | 7.24E-04 | 2.48E-02 |
| PAQR9     | -0.29 | 5.54  | -3.39 | 7.26E-04 | 2.48E-02 |
| MLXIP     | 0.19  | 8.97  | 3.39  | 7.30E-04 | 2.48E-02 |
| ANXA4     | 0.31  | 6.69  | 3.39  | 7.30E-04 | 2.48E-02 |
| SGTB      | -0.18 | 8.24  | -3.39 | 7.33E-04 | 2.49E-02 |
| CLUAP1    | 0.17  | 7.73  | 3.39  | 7.39E-04 | 2.50E-02 |
| FAM234B   | -0.25 | 8.33  | -3.39 | 7.39E-04 | 2.50E-02 |
| DPH2      | 0.14  | 7.06  | 3.39  | 7.43E-04 | 2.51E-02 |
| FZD10     | 0.37  | 5.79  | 3.39  | 7.44E-04 | 2.51E-02 |
| TWF2      | 0.19  | 7.92  | 3.38  | 7.55E-04 | 2.54E-02 |
| YBEY      | 0.12  | 6.11  | 3.38  | 7.55E-04 | 2.54E-02 |
| TMPRSS11B | -0.06 | 2.72  | -3.38 | 7.59E-04 | 2.54E-02 |
| CCNO      | 0.10  | 5.76  | 3.38  | 7.60E-04 | 2.54E-02 |
| SMURF1    | -0.14 | 8.29  | -3.38 | 7.62E-04 | 2.55E-02 |
| STRADB    | -0.20 | 10.01 | -3.38 | 7.64E-04 | 2.55E-02 |
| KATNAL2   | 0.21  | 6.48  | 3.38  | 7.74E-04 | 2.58E-02 |
| CDC7      | -0.19 | 6.46  | -3.37 | 7.79E-04 | 2.58E-02 |
| ZNRF3-AS1 | 0.12  | 4.10  | 3.37  | 7.80E-04 | 2.58E-02 |
| LCN12     | 0.10  | 5.58  | 3.37  | 7.85E-04 | 2.59E-02 |
| RALGDS    | 0.17  | 8.12  | 3.37  | 7.86E-04 | 2.59E-02 |
| ETV1      | -0.40 | 9.02  | -3.37 | 7.86E-04 | 2.59E-02 |
| FHAD1     | 0.10  | 4.44  | 3.37  | 7.87E-04 | 2.59E-02 |
| NKD1      | 0.51  | 7.73  | 3.37  | 7.89E-04 | 2.59E-02 |
| FBXW7     | -0.22 | 7.77  | -3.37 | 7.93E-04 | 2.60E-02 |
| FLJ34503  | -0.19 | 5.07  | -3.37 | 7.95E-04 | 2.60E-02 |
| ZNF654    | -0.15 | 7.67  | -3.37 | 7.96E-04 | 2.60E-02 |
| TRUB2     | 0.13  | 7.87  | 3.36  | 8.09E-04 | 2.64E-02 |
| ZNRF3     | 0.26  | 7.07  | 3.36  | 8.11E-04 | 2.64E-02 |
| MOSPD2    | -0.14 | 7.72  | -3.36 | 8.14E-04 | 2.64E-02 |
| RAB11A    | 0.11  | 9.39  | 3.36  | 8.15E-04 | 2.64E-02 |
| EVL       | -0.18 | 8.80  | -3.36 | 8.15E-04 | 2.64E-02 |
| CITED1    | -0.23 | 6.19  | -3.36 | 8.16E-04 | 2.64E-02 |
| KCNQ1     | 0.16  | 5.11  | 3.36  | 8.21E-04 | 2.65E-02 |
| POU6F1    | -0.18 | 7.91  | -3.36 | 8.24E-04 | 2.65E-02 |
| PDE11A    | 0.56  | 4.70  | 3.36  | 8.26E-04 | 2.66E-02 |
| PARD3B    | 0.26  | 5.81  | 3.36  | 8.31E-04 | 2.66E-02 |
| TRAPPC6A  | 0.14  | 6.23  | 3.36  | 8.31E-04 | 2.66E-02 |
| GUCY1B3   | -0.29 | 7.28  | -3.35 | 8.36E-04 | 2.67E-02 |
| F8        | 0.16  | 5.89  | 3.35  | 8.37E-04 | 2.67E-02 |
| CLMN      | -0.37 | 6.49  | -3.35 | 8.41E-04 | 2.68E-02 |
| RNGTT     | -0.15 | 8.53  | -3.35 | 8.43E-04 | 2.69E-02 |
| RP1       | -0.47 | 3.87  | -3.35 | 8.47E-04 | 2.69E-02 |
| VAMP3     | 0.10  | 8.43  | 3.35  | 8.48E-04 | 2.69E-02 |
| IMPG1     | -0.39 | 4.67  | -3.35 | 8.51E-04 | 2.69E-02 |

|            |       |       |       |          |          |
|------------|-------|-------|-------|----------|----------|
| RPGRIP1L   | 0.20  | 7.62  | 3.35  | 8.54E-04 | 2.70E-02 |
| SSPN       | 0.22  | 7.06  | 3.35  | 8.59E-04 | 2.71E-02 |
| SLC39A8    | 0.25  | 7.39  | 3.35  | 8.59E-04 | 2.71E-02 |
| TSPAN5     | 0.28  | 9.43  | 3.34  | 8.66E-04 | 2.72E-02 |
| CEP126     | 0.40  | 6.45  | 3.34  | 8.67E-04 | 2.72E-02 |
| PPM1E      | -0.26 | 7.60  | -3.34 | 8.68E-04 | 2.72E-02 |
| ABCA7      | -0.35 | 5.86  | -3.34 | 8.70E-04 | 2.72E-02 |
| NFIA       | 0.37  | 11.04 | 3.34  | 8.77E-04 | 2.74E-02 |
| ARL6IP1    | -0.12 | 12.64 | -3.34 | 8.83E-04 | 2.75E-02 |
| B3GAT2     | -0.25 | 5.78  | -3.34 | 8.85E-04 | 2.75E-02 |
| KRTAP5-8   | 0.13  | 7.31  | 3.34  | 8.86E-04 | 2.75E-02 |
| PLPPR1     | -0.37 | 8.07  | -3.34 | 8.88E-04 | 2.75E-02 |
| AP1S3      | -0.23 | 5.27  | -3.34 | 8.89E-04 | 2.75E-02 |
| ANTXR1     | 0.27  | 8.49  | 3.34  | 8.94E-04 | 2.76E-02 |
| FJX1       | 0.27  | 6.61  | 3.34  | 8.95E-04 | 2.76E-02 |
| LRRC23     | 0.12  | 6.65  | 3.33  | 8.99E-04 | 2.77E-02 |
| DICER1     | -0.13 | 9.63  | -3.33 | 9.01E-04 | 2.77E-02 |
| RANBP6     | -0.15 | 9.04  | -3.33 | 9.03E-04 | 2.77E-02 |
| ACVR1      | -0.25 | 8.21  | -3.33 | 9.06E-04 | 2.78E-02 |
| ECEL1      | 0.24  | 5.31  | 3.33  | 9.09E-04 | 2.78E-02 |
| ADAM15     | 0.17  | 6.87  | 3.33  | 9.17E-04 | 2.80E-02 |
| ZNF688     | 0.12  | 6.88  | 3.33  | 9.21E-04 | 2.81E-02 |
| UBXN11     | 0.16  | 6.44  | 3.33  | 9.22E-04 | 2.81E-02 |
| HAND2      | 0.30  | 4.57  | 3.33  | 9.24E-04 | 2.81E-02 |
| GCNT4      | -0.35 | 4.42  | -3.33 | 9.26E-04 | 2.81E-02 |
| PAFAH2     | 0.12  | 6.80  | 3.32  | 9.30E-04 | 2.82E-02 |
| SAMD7      | -0.47 | 4.57  | -3.32 | 9.32E-04 | 2.82E-02 |
| ADGRL1     | -0.27 | 8.93  | -3.32 | 9.42E-04 | 2.84E-02 |
| PDZD7      | -0.17 | 5.78  | -3.32 | 9.51E-04 | 2.87E-02 |
| ACTR3B     | 0.22  | 8.74  | 3.31  | 9.63E-04 | 2.89E-02 |
| PPP2R5E    | -0.11 | 8.49  | -3.31 | 9.63E-04 | 2.89E-02 |
| C10orf11   | 0.19  | 5.00  | 3.31  | 9.72E-04 | 2.92E-02 |
| MEST       | 0.27  | 10.70 | 3.31  | 9.73E-04 | 2.92E-02 |
| ASRGL1     | -0.18 | 7.63  | -3.31 | 9.75E-04 | 2.92E-02 |
| COQ9       | 0.13  | 8.80  | 3.31  | 9.88E-04 | 2.95E-02 |
| ZNF860     | 0.13  | 3.84  | 3.31  | 9.91E-04 | 2.96E-02 |
| ZBTB11-AS1 | 0.14  | 7.09  | 3.31  | 9.93E-04 | 2.96E-02 |
| FKBP10     | 0.48  | 7.57  | 3.30  | 9.98E-04 | 2.96E-02 |
| ADCK5      | -0.11 | 5.68  | -3.30 | 9.98E-04 | 2.96E-02 |
| SLC16A14   | -0.37 | 7.82  | -3.30 | 1.00E-03 | 2.97E-02 |
| ZNF174     | 0.09  | 7.20  | 3.30  | 1.00E-03 | 2.97E-02 |
| RHOU       | 0.28  | 8.82  | 3.30  | 1.01E-03 | 2.98E-02 |
| HOXB2      | 0.41  | 5.73  | 3.30  | 1.01E-03 | 2.98E-02 |
| CELF2      | -0.29 | 9.20  | -3.30 | 1.01E-03 | 2.98E-02 |
| PI3        | -0.08 | 4.34  | -3.30 | 1.01E-03 | 2.98E-02 |
| LINC01879  | -0.07 | 3.60  | -3.30 | 1.02E-03 | 2.99E-02 |
| NPAP1      | 0.19  | 5.77  | 3.30  | 1.02E-03 | 2.99E-02 |
| HOXA11     | 0.21  | 3.52  | 3.30  | 1.02E-03 | 2.99E-02 |
| CDK15      | 0.23  | 4.12  | 3.30  | 1.03E-03 | 3.00E-02 |
| ZBTB20     | 0.26  | 9.98  | 3.30  | 1.03E-03 | 3.01E-02 |
| SCUBE1     | 0.17  | 5.70  | 3.29  | 1.03E-03 | 3.01E-02 |
| DIRAS1     | -0.16 | 8.17  | -3.29 | 1.04E-03 | 3.02E-02 |
| SSX2IP     | -0.23 | 7.78  | -3.29 | 1.04E-03 | 3.02E-02 |

|          |       |      |       |          |          |
|----------|-------|------|-------|----------|----------|
| PDE6G    | -0.40 | 5.45 | -3.29 | 1.05E-03 | 3.03E-02 |
| ZNFX1    | -0.11 | 7.78 | -3.29 | 1.06E-03 | 3.07E-02 |
| GPR139   | -0.31 | 7.28 | -3.28 | 1.07E-03 | 3.09E-02 |
| RAB3IL1  | 0.12  | 5.97 | 3.28  | 1.07E-03 | 3.09E-02 |
| OR6T1    | -0.09 | 4.05 | -3.28 | 1.07E-03 | 3.09E-02 |
| CCDC148  | 0.29  | 4.98 | 3.28  | 1.08E-03 | 3.11E-02 |
| GLCE     | 0.28  | 9.81 | 3.28  | 1.08E-03 | 3.11E-02 |
| EVC2     | 0.29  | 4.80 | 3.28  | 1.10E-03 | 3.15E-02 |
| ELAVL2   | -0.32 | 9.10 | -3.28 | 1.10E-03 | 3.15E-02 |
| RORA     | -0.25 | 7.97 | -3.27 | 1.11E-03 | 3.16E-02 |
| ZNF556   | 0.17  | 5.52 | 3.27  | 1.11E-03 | 3.17E-02 |
| TSPAN14  | 0.18  | 8.50 | 3.27  | 1.11E-03 | 3.17E-02 |
| INHBB    | -0.24 | 7.11 | -3.27 | 1.12E-03 | 3.17E-02 |
| MEGF8    | 0.15  | 6.58 | 3.27  | 1.12E-03 | 3.17E-02 |
| NHLRC1   | -0.20 | 5.85 | -3.27 | 1.12E-03 | 3.17E-02 |
| ING2     | -0.17 | 6.48 | -3.27 | 1.12E-03 | 3.17E-02 |
| WDR45    | 0.11  | 6.99 | 3.27  | 1.12E-03 | 3.17E-02 |
| SLC35B4  | -0.15 | 8.38 | -3.27 | 1.13E-03 | 3.19E-02 |
| COX8C    | 0.27  | 6.14 | 3.27  | 1.13E-03 | 3.19E-02 |
| HIST1H4D | -0.44 | 7.51 | -3.27 | 1.14E-03 | 3.20E-02 |
| RASGRF2  | -0.53 | 7.38 | -3.26 | 1.15E-03 | 3.23E-02 |
| ZNF30    | -0.14 | 5.78 | -3.26 | 1.16E-03 | 3.23E-02 |
| TGFB3    | -0.37 | 7.25 | -3.26 | 1.16E-03 | 3.23E-02 |
| SND1-IT1 | -0.21 | 7.93 | -3.26 | 1.16E-03 | 3.23E-02 |
| GPBP1L1  | 0.11  | 8.62 | 3.26  | 1.16E-03 | 3.23E-02 |
| ADCY9    | -0.16 | 7.43 | -3.26 | 1.16E-03 | 3.23E-02 |
| CACUL1   | 0.11  | 8.95 | 3.26  | 1.16E-03 | 3.23E-02 |
| FKTN     | 0.12  | 7.03 | 3.26  | 1.17E-03 | 3.23E-02 |
| MYH2     | -0.06 | 3.59 | -3.26 | 1.17E-03 | 3.23E-02 |
| AOX1     | 0.21  | 4.31 | 3.26  | 1.17E-03 | 3.23E-02 |
| CCNDBP1  | 0.11  | 7.65 | 3.26  | 1.17E-03 | 3.23E-02 |
| SESN2    | -0.16 | 6.33 | -3.26 | 1.17E-03 | 3.23E-02 |
| AFMID    | 0.25  | 7.46 | 3.26  | 1.17E-03 | 3.23E-02 |
| PRR19    | 0.11  | 4.57 | 3.26  | 1.18E-03 | 3.24E-02 |
| RARB     | 0.41  | 6.14 | 3.26  | 1.18E-03 | 3.24E-02 |
| H2AFJ    | -0.34 | 6.22 | -3.25 | 1.19E-03 | 3.26E-02 |
| SLC22A23 | -0.37 | 7.26 | -3.25 | 1.19E-03 | 3.26E-02 |
| PRKCE    | -0.29 | 6.39 | -3.25 | 1.20E-03 | 3.27E-02 |
| SERPINE2 | 0.37  | 7.05 | 3.25  | 1.20E-03 | 3.27E-02 |
| E2F6     | -0.11 | 7.42 | -3.25 | 1.20E-03 | 3.27E-02 |
| SWAP70   | -0.16 | 7.13 | -3.25 | 1.21E-03 | 3.29E-02 |
| LRRK2    | -0.19 | 4.92 | -3.25 | 1.21E-03 | 3.31E-02 |
| STON2    | 0.26  | 6.24 | 3.25  | 1.22E-03 | 3.32E-02 |
| NFKB2    | 0.22  | 5.64 | 3.25  | 1.22E-03 | 3.32E-02 |
| ARSD     | 0.14  | 7.26 | 3.24  | 1.23E-03 | 3.32E-02 |
| AP1G2    | 0.17  | 7.39 | 3.24  | 1.23E-03 | 3.32E-02 |
| TMEM234  | 0.12  | 7.24 | 3.24  | 1.24E-03 | 3.33E-02 |
| CD96     | 0.15  | 4.24 | 3.24  | 1.24E-03 | 3.33E-02 |
| DOCK9    | -0.30 | 8.65 | -3.24 | 1.24E-03 | 3.34E-02 |
| PPM1D    | -0.22 | 9.09 | -3.24 | 1.25E-03 | 3.35E-02 |
| MIR186   | 0.19  | 5.71 | 3.24  | 1.25E-03 | 3.35E-02 |
| EFNA2    | -0.15 | 5.83 | -3.24 | 1.25E-03 | 3.36E-02 |
| ENTPD5   | 0.11  | 6.85 | 3.24  | 1.26E-03 | 3.36E-02 |



|           |       |       |       |          |          |
|-----------|-------|-------|-------|----------|----------|
| ICK       | -0.17 | 9.38  | -3.24 | 1.26E-03 | 3.36E-02 |
| AKR7A2    | 0.10  | 8.60  | 3.24  | 1.26E-03 | 3.36E-02 |
| EDARADD   | 0.21  | 4.76  | 3.24  | 1.26E-03 | 3.37E-02 |
| SNX18     | -0.13 | 6.56  | -3.23 | 1.28E-03 | 3.40E-02 |
| BAGE5     | -0.11 | 8.24  | -3.23 | 1.28E-03 | 3.41E-02 |
| FGFRL1    | 0.20  | 7.33  | 3.23  | 1.29E-03 | 3.42E-02 |
| GCM1      | 0.30  | 4.23  | 3.23  | 1.29E-03 | 3.42E-02 |
| MAP3K9    | -0.25 | 7.44  | -3.23 | 1.30E-03 | 3.43E-02 |
| PDGFC     | 0.37  | 7.25  | 3.23  | 1.30E-03 | 3.44E-02 |
| THBS3     | 0.28  | 6.95  | 3.23  | 1.30E-03 | 3.44E-02 |
| MAP3K13   | -0.37 | 8.49  | -3.23 | 1.31E-03 | 3.44E-02 |
| TMEM179   | -0.23 | 6.79  | -3.23 | 1.31E-03 | 3.44E-02 |
| PALMD     | -0.44 | 7.42  | -3.23 | 1.31E-03 | 3.44E-02 |
| ULK4      | 0.22  | 5.85  | 3.23  | 1.31E-03 | 3.44E-02 |
| AK8       | 0.17  | 6.13  | 3.23  | 1.31E-03 | 3.44E-02 |
| MXRA7     | -0.21 | 9.68  | -3.22 | 1.32E-03 | 3.45E-02 |
| SERPINB8  | 0.18  | 5.94  | 3.22  | 1.32E-03 | 3.45E-02 |
| SLC35D2   | 0.27  | 6.66  | 3.22  | 1.33E-03 | 3.46E-02 |
| TK2       | 0.15  | 7.37  | 3.22  | 1.33E-03 | 3.46E-02 |
| TSPAN17   | 0.22  | 7.41  | 3.22  | 1.34E-03 | 3.47E-02 |
| UBXN6     | 0.11  | 7.70  | 3.22  | 1.34E-03 | 3.47E-02 |
| LINC01658 | -0.14 | 4.62  | -3.22 | 1.34E-03 | 3.47E-02 |
| MAF       | 0.38  | 5.62  | 3.22  | 1.34E-03 | 3.47E-02 |
| FAM86C1   | 0.11  | 6.16  | 3.22  | 1.34E-03 | 3.47E-02 |
| RSRC1     | 0.22  | 8.73  | 3.22  | 1.35E-03 | 3.49E-02 |
| NR4A3     | -0.32 | 6.51  | -3.22 | 1.35E-03 | 3.49E-02 |
| RGL1      | 0.43  | 8.01  | 3.22  | 1.36E-03 | 3.50E-02 |
| PGM1      | 0.41  | 7.93  | 3.21  | 1.37E-03 | 3.51E-02 |
| DPPA4     | -0.07 | 4.14  | -3.21 | 1.37E-03 | 3.51E-02 |
| TMEM9     | 0.12  | 7.12  | 3.21  | 1.37E-03 | 3.51E-02 |
| KIDINS220 | -0.17 | 9.50  | -3.21 | 1.37E-03 | 3.51E-02 |
| EXOC3L1   | 0.25  | 6.04  | 3.21  | 1.37E-03 | 3.51E-02 |
| SAP30L    | 0.11  | 7.61  | 3.21  | 1.38E-03 | 3.53E-02 |
| ABHD13    | -0.10 | 9.51  | -3.21 | 1.39E-03 | 3.54E-02 |
| PDPN      | 0.43  | 6.90  | 3.21  | 1.39E-03 | 3.54E-02 |
| GPR35     | 0.12  | 5.82  | 3.21  | 1.39E-03 | 3.54E-02 |
| PRMT2     | 0.11  | 7.61  | 3.21  | 1.39E-03 | 3.54E-02 |
| PSD2      | 0.27  | 7.08  | 3.21  | 1.40E-03 | 3.55E-02 |
| MYH7      | 0.14  | 5.96  | 3.21  | 1.40E-03 | 3.55E-02 |
| RELL1     | -0.25 | 8.21  | -3.21 | 1.40E-03 | 3.55E-02 |
| ASB13     | 0.29  | 7.28  | 3.21  | 1.41E-03 | 3.56E-02 |
| GEMIN5    | 0.11  | 7.72  | 3.20  | 1.42E-03 | 3.59E-02 |
| TAB2      | -0.10 | 8.42  | -3.20 | 1.43E-03 | 3.60E-02 |
| PBXIP1    | 0.11  | 5.84  | 3.20  | 1.43E-03 | 3.60E-02 |
| GNAO1     | -0.32 | 10.31 | -3.20 | 1.43E-03 | 3.60E-02 |
| CETN2     | 0.12  | 8.92  | 3.20  | 1.44E-03 | 3.60E-02 |
| WFDC2     | 0.15  | 5.43  | 3.20  | 1.44E-03 | 3.60E-02 |
| FAM98A    | -0.12 | 8.61  | -3.20 | 1.44E-03 | 3.60E-02 |
| SEC14L1   | -0.12 | 7.88  | -3.20 | 1.46E-03 | 3.63E-02 |
| CKB       | -0.34 | 9.74  | -3.20 | 1.46E-03 | 3.63E-02 |
| LBR       | -0.16 | 8.69  | -3.20 | 1.46E-03 | 3.63E-02 |
| ZSWIM6    | -0.14 | 9.94  | -3.19 | 1.47E-03 | 3.66E-02 |
| CLTC      | -0.15 | 10.17 | -3.19 | 1.47E-03 | 3.66E-02 |

|          |       |       |       |          |          |
|----------|-------|-------|-------|----------|----------|
| ZNF69    | -0.17 | 8.07  | -3.19 | 1.48E-03 | 3.66E-02 |
| PTER     | -0.27 | 5.56  | -3.19 | 1.48E-03 | 3.66E-02 |
| ATP1A2   | 0.32  | 8.19  | 3.19  | 1.48E-03 | 3.66E-02 |
| FAM81A   | -0.18 | 5.43  | -3.19 | 1.48E-03 | 3.66E-02 |
| WWP1     | -0.14 | 8.95  | -3.19 | 1.48E-03 | 3.66E-02 |
| FAIM     | 0.17  | 5.87  | 3.19  | 1.51E-03 | 3.72E-02 |
| RSPO1    | 0.35  | 5.43  | 3.18  | 1.51E-03 | 3.72E-02 |
| GABRB3   | -0.19 | 9.88  | -3.18 | 1.52E-03 | 3.72E-02 |
| SNAP91   | -0.31 | 9.45  | -3.18 | 1.52E-03 | 3.72E-02 |
| ANKRD18B | -0.30 | 4.80  | -3.18 | 1.53E-03 | 3.73E-02 |
| EPB41L4B | 0.39  | 7.32  | 3.18  | 1.53E-03 | 3.73E-02 |
| NKX2-5   | 0.12  | 6.19  | 3.18  | 1.53E-03 | 3.73E-02 |
| AFG1L    | -0.13 | 7.06  | -3.18 | 1.53E-03 | 3.74E-02 |
| AMPD2    | 0.21  | 6.87  | 3.18  | 1.54E-03 | 3.75E-02 |
| REPS1    | -0.18 | 9.78  | -3.18 | 1.54E-03 | 3.75E-02 |
| SYTL2    | 0.19  | 5.80  | 3.18  | 1.54E-03 | 3.75E-02 |
| SCNN1B   | 0.22  | 5.69  | 3.18  | 1.55E-03 | 3.75E-02 |
| TTLL10   | 0.08  | 5.76  | 3.18  | 1.55E-03 | 3.75E-02 |
| GPRIN3   | -0.37 | 7.87  | -3.18 | 1.55E-03 | 3.75E-02 |
| PIK3C2G  | -0.09 | 3.60  | -3.18 | 1.55E-03 | 3.75E-02 |
| TMEM45B  | 0.17  | 5.09  | 3.18  | 1.55E-03 | 3.75E-02 |
| BSPH1    | -0.52 | 4.34  | -3.18 | 1.55E-03 | 3.75E-02 |
| C4orf33  | -0.21 | 6.97  | -3.18 | 1.56E-03 | 3.75E-02 |
| JAZF1    | -0.29 | 7.63  | -3.18 | 1.56E-03 | 3.75E-02 |
| SNX25    | -0.15 | 8.21  | -3.17 | 1.56E-03 | 3.75E-02 |
| SLC18A1  | 0.14  | 4.73  | 3.17  | 1.57E-03 | 3.76E-02 |
| CLCC1    | 0.08  | 9.33  | 3.17  | 1.57E-03 | 3.77E-02 |
| ERCC1    | 0.11  | 7.95  | 3.17  | 1.57E-03 | 3.77E-02 |
| FOXS1    | 0.18  | 6.21  | 3.17  | 1.59E-03 | 3.79E-02 |
| USP50    | 0.09  | 4.17  | 3.17  | 1.59E-03 | 3.79E-02 |
| MT1F     | 0.33  | 10.64 | 3.17  | 1.59E-03 | 3.79E-02 |
| KCTD10   | -0.13 | 8.35  | -3.17 | 1.59E-03 | 3.79E-02 |
| BLID     | 0.44  | 5.36  | 3.17  | 1.60E-03 | 3.81E-02 |
| ACAT2    | -0.17 | 6.89  | -3.17 | 1.61E-03 | 3.81E-02 |
| TMEM53   | 0.15  | 7.55  | 3.17  | 1.61E-03 | 3.81E-02 |
| DBP      | -0.20 | 7.56  | -3.17 | 1.61E-03 | 3.81E-02 |
| NUDT6    | 0.11  | 6.41  | 3.17  | 1.61E-03 | 3.81E-02 |
| IFT57    | 0.34  | 8.27  | 3.16  | 1.62E-03 | 3.82E-02 |
| TRIO     | 0.15  | 10.24 | 3.16  | 1.62E-03 | 3.82E-02 |
| LMTK2    | -0.14 | 8.60  | -3.16 | 1.62E-03 | 3.82E-02 |
| MTFR1    | -0.15 | 8.39  | -3.16 | 1.63E-03 | 3.82E-02 |
| ZNF691   | 0.10  | 6.41  | 3.16  | 1.63E-03 | 3.82E-02 |
| FLT4     | 0.30  | 5.31  | 3.16  | 1.63E-03 | 3.82E-02 |
| VAV2     | 0.20  | 7.21  | 3.16  | 1.64E-03 | 3.82E-02 |
| PRR5L    | 0.28  | 5.94  | 3.16  | 1.64E-03 | 3.82E-02 |
| SLC38A1  | -0.42 | 10.22 | -3.16 | 1.64E-03 | 3.82E-02 |
| ZNF169   | 0.10  | 6.05  | 3.16  | 1.64E-03 | 3.82E-02 |
| TNNC1    | 0.16  | 5.53  | 3.16  | 1.64E-03 | 3.82E-02 |
| ALDH1B1  | 0.18  | 8.12  | 3.16  | 1.64E-03 | 3.82E-02 |
| PLCD4    | 0.29  | 5.27  | 3.16  | 1.67E-03 | 3.87E-02 |
| MRPL24   | 0.11  | 7.34  | 3.16  | 1.67E-03 | 3.88E-02 |
| FBXO18   | 0.13  | 7.83  | 3.15  | 1.67E-03 | 3.88E-02 |
| KCNJ6    | 0.48  | 7.33  | 3.15  | 1.68E-03 | 3.89E-02 |

|           |       |       |       |          |          |
|-----------|-------|-------|-------|----------|----------|
| ACKR1     | -0.29 | 7.69  | -3.15 | 1.68E-03 | 3.89E-02 |
| KCTD17    | 0.18  | 7.09  | 3.15  | 1.68E-03 | 3.89E-02 |
| TMEM67    | 0.18  | 7.42  | 3.15  | 1.69E-03 | 3.90E-02 |
| SVIL      | 0.31  | 6.61  | 3.15  | 1.70E-03 | 3.93E-02 |
| SAMD3     | -0.69 | 6.18  | -3.15 | 1.71E-03 | 3.93E-02 |
| TSNAXIP1  | 0.11  | 5.06  | 3.15  | 1.73E-03 | 3.97E-02 |
| CNOT4     | -0.12 | 9.45  | -3.14 | 1.73E-03 | 3.97E-02 |
| DMRT2     | 0.25  | 3.91  | 3.14  | 1.73E-03 | 3.97E-02 |
| FAM169A   | -0.31 | 6.75  | -3.14 | 1.73E-03 | 3.97E-02 |
| RDH8      | -0.20 | 4.57  | -3.14 | 1.74E-03 | 3.98E-02 |
| HAPLN4    | 0.20  | 5.53  | 3.14  | 1.75E-03 | 3.99E-02 |
| G2E3      | -0.14 | 8.16  | -3.14 | 1.75E-03 | 3.99E-02 |
| TADA3     | 0.10  | 8.27  | 3.14  | 1.75E-03 | 3.99E-02 |
| BIRC6     | -0.08 | 9.45  | -3.14 | 1.76E-03 | 4.01E-02 |
| FAM124B   | 0.17  | 5.11  | 3.14  | 1.76E-03 | 4.01E-02 |
| FBXO5     | -0.22 | 8.10  | -3.14 | 1.76E-03 | 4.01E-02 |
| GNRHR2    | -0.15 | 6.09  | -3.14 | 1.77E-03 | 4.01E-02 |
| MYB       | -0.34 | 6.80  | -3.14 | 1.77E-03 | 4.01E-02 |
| MAML3     | 0.21  | 9.56  | 3.14  | 1.77E-03 | 4.01E-02 |
| CEP250    | -0.11 | 6.35  | -3.14 | 1.78E-03 | 4.03E-02 |
| RASA3     | 0.24  | 6.71  | 3.13  | 1.79E-03 | 4.04E-02 |
| PPCS      | 0.09  | 6.56  | 3.13  | 1.79E-03 | 4.04E-02 |
| GEMIN8    | 0.13  | 7.24  | 3.13  | 1.79E-03 | 4.04E-02 |
| LANCL2    | -0.17 | 9.69  | -3.13 | 1.81E-03 | 4.08E-02 |
| ELOVL3    | -0.07 | 3.65  | -3.13 | 1.82E-03 | 4.08E-02 |
| WDR81     | 0.14  | 6.54  | 3.13  | 1.82E-03 | 4.09E-02 |
| MYRIP     | -0.35 | 7.76  | -3.13 | 1.83E-03 | 4.10E-02 |
| USP13     | 0.17  | 8.54  | 3.13  | 1.83E-03 | 4.10E-02 |
| C22orf31  | 0.17  | 3.77  | 3.13  | 1.83E-03 | 4.10E-02 |
| GAB1      | 0.41  | 7.01  | 3.13  | 1.84E-03 | 4.10E-02 |
| LOC151174 | -0.12 | 5.25  | -3.13 | 1.84E-03 | 4.10E-02 |
| TEAD2     | 0.28  | 7.72  | 3.13  | 1.84E-03 | 4.10E-02 |
| ALDH6A1   | 0.12  | 8.07  | 3.12  | 1.85E-03 | 4.12E-02 |
| SLC12A4   | 0.23  | 6.66  | 3.12  | 1.86E-03 | 4.12E-02 |
| GCGR      | 0.20  | 5.38  | 3.12  | 1.86E-03 | 4.12E-02 |
| FBXL7     | 0.41  | 7.35  | 3.12  | 1.86E-03 | 4.12E-02 |
| STK40     | -0.11 | 7.40  | -3.12 | 1.86E-03 | 4.12E-02 |
| LOC648987 | 0.31  | 6.36  | 3.12  | 1.90E-03 | 4.19E-02 |
| NDUFA9    | -0.13 | 10.06 | -3.12 | 1.91E-03 | 4.21E-02 |
| NTM-AS1   | -0.14 | 4.38  | -3.12 | 1.91E-03 | 4.21E-02 |
| ARL5A     | -0.11 | 7.78  | -3.11 | 1.91E-03 | 4.21E-02 |
| OR5R1     | -0.09 | 4.36  | -3.11 | 1.92E-03 | 4.23E-02 |
| BRMS1L    | -0.21 | 5.66  | -3.11 | 1.92E-03 | 4.23E-02 |
| PEX19     | 0.10  | 7.81  | 3.11  | 1.93E-03 | 4.23E-02 |
| ATG4A     | -0.13 | 6.13  | -3.11 | 1.93E-03 | 4.23E-02 |
| KAT2B     | -0.25 | 8.86  | -3.11 | 1.93E-03 | 4.23E-02 |
| ROR2      | 0.45  | 6.07  | 3.11  | 1.94E-03 | 4.24E-02 |
| BCKDK     | 0.11  | 7.74  | 3.11  | 1.94E-03 | 4.24E-02 |
| BDNF      | -0.21 | 4.44  | -3.11 | 1.95E-03 | 4.25E-02 |
| CPSF4L    | 0.16  | 4.58  | 3.11  | 1.95E-03 | 4.25E-02 |
| ADSSL1    | 0.19  | 6.27  | 3.11  | 1.96E-03 | 4.27E-02 |
| RACGAP1   | -0.17 | 9.35  | -3.11 | 1.97E-03 | 4.28E-02 |
| RASSF3    | 0.25  | 5.70  | 3.10  | 1.98E-03 | 4.31E-02 |

|            |       |      |       |          |          |
|------------|-------|------|-------|----------|----------|
| GAD2       | 0.28  | 4.24 | 3.10  | 1.99E-03 | 4.32E-02 |
| NFATC1     | 0.42  | 6.33 | 3.10  | 2.00E-03 | 4.34E-02 |
| EVI5L      | -0.19 | 7.09 | -3.10 | 2.01E-03 | 4.35E-02 |
| RAX2       | -0.18 | 5.99 | -3.10 | 2.01E-03 | 4.35E-02 |
| FGF2       | 0.22  | 6.79 | 3.10  | 2.02E-03 | 4.35E-02 |
| PTGES2-AS1 | 0.06  | 3.60 | 3.10  | 2.02E-03 | 4.35E-02 |
| VSTM2L     | -0.23 | 6.15 | -3.10 | 2.02E-03 | 4.35E-02 |
| THAP7      | 0.09  | 7.17 | 3.10  | 2.02E-03 | 4.35E-02 |
| ANGPTL2    | 0.54  | 8.21 | 3.10  | 2.02E-03 | 4.35E-02 |
| LRRC4      | -0.31 | 7.26 | -3.10 | 2.03E-03 | 4.37E-02 |
| DHX34      | 0.11  | 7.19 | 3.10  | 2.04E-03 | 4.37E-02 |
| NAA16      | -0.10 | 8.48 | -3.09 | 2.04E-03 | 4.37E-02 |
| LZTR1      | 0.09  | 8.00 | 3.09  | 2.04E-03 | 4.37E-02 |
| MKRN3      | 0.18  | 6.98 | 3.09  | 2.05E-03 | 4.38E-02 |
| RRM2       | -0.27 | 6.95 | -3.09 | 2.05E-03 | 4.38E-02 |
| DACT1      | 0.39  | 7.61 | 3.09  | 2.06E-03 | 4.39E-02 |
| COL11A2    | -0.17 | 6.23 | -3.09 | 2.06E-03 | 4.39E-02 |
| TMEM63A    | 0.27  | 6.87 | 3.09  | 2.06E-03 | 4.39E-02 |
| SKA2       | -0.22 | 9.79 | -3.09 | 2.07E-03 | 4.39E-02 |
| MRRF       | 0.12  | 7.94 | 3.09  | 2.07E-03 | 4.40E-02 |
| BDH1       | 0.26  | 6.28 | 3.09  | 2.08E-03 | 4.41E-02 |
| OR5D14     | -0.06 | 3.10 | -3.09 | 2.09E-03 | 4.42E-02 |
| ACHE       | -0.30 | 6.33 | -3.09 | 2.10E-03 | 4.44E-02 |
| ZMYM1      | 0.12  | 7.16 | 3.09  | 2.10E-03 | 4.44E-02 |
| IGSF8      | 0.14  | 7.54 | 3.09  | 2.11E-03 | 4.44E-02 |
| SLC30A10   | 0.21  | 6.21 | 3.08  | 2.12E-03 | 4.46E-02 |
| LSR        | 0.17  | 6.08 | 3.08  | 2.12E-03 | 4.46E-02 |
| NOTUM      | 0.28  | 4.81 | 3.08  | 2.13E-03 | 4.48E-02 |
| LRRC43     | 0.08  | 4.34 | 3.08  | 2.13E-03 | 4.48E-02 |
| SFXN2      | 0.20  | 7.22 | 3.08  | 2.14E-03 | 4.48E-02 |
| CPNE8      | -0.26 | 5.97 | -3.08 | 2.15E-03 | 4.51E-02 |
| OR2AK2     | -0.44 | 6.16 | -3.08 | 2.16E-03 | 4.52E-02 |
| DCLK1      | -0.31 | 9.30 | -3.08 | 2.16E-03 | 4.52E-02 |
| FTCD       | 0.07  | 5.60 | 3.08  | 2.17E-03 | 4.52E-02 |
| ZNF398     | -0.14 | 8.53 | -3.08 | 2.18E-03 | 4.55E-02 |
| CACNA1D    | 0.36  | 6.95 | 3.07  | 2.19E-03 | 4.55E-02 |
| SYNE1      | -0.31 | 7.22 | -3.07 | 2.19E-03 | 4.56E-02 |
| NSUN4      | 0.11  | 7.92 | 3.07  | 2.20E-03 | 4.58E-02 |
| GNAT1      | -0.59 | 5.62 | -3.07 | 2.21E-03 | 4.58E-02 |
| KRTAP5-9   | 0.12  | 5.42 | 3.07  | 2.21E-03 | 4.58E-02 |
| KBTBD2     | -0.11 | 8.54 | -3.07 | 2.21E-03 | 4.58E-02 |
| GSN-AS1    | 0.12  | 4.15 | 3.07  | 2.21E-03 | 4.58E-02 |
| CAMKK1     | 0.27  | 7.28 | 3.07  | 2.22E-03 | 4.59E-02 |
| IL2        | -0.05 | 2.86 | -3.07 | 2.23E-03 | 4.59E-02 |
| CFTR       | -0.23 | 4.02 | -3.07 | 2.23E-03 | 4.59E-02 |
| Mar-01     | -0.32 | 8.18 | -3.07 | 2.23E-03 | 4.59E-02 |
| ARSG       | -0.21 | 7.22 | -3.07 | 2.23E-03 | 4.59E-02 |
| ADAMTS10   | -0.25 | 7.35 | -3.07 | 2.24E-03 | 4.59E-02 |
| SNORA69    | 0.12  | 3.31 | 3.07  | 2.24E-03 | 4.59E-02 |
| FRMD4B     | -0.33 | 8.86 | -3.07 | 2.24E-03 | 4.59E-02 |
| RNF10      | -0.09 | 9.04 | -3.07 | 2.25E-03 | 4.59E-02 |
| PDC        | -0.29 | 5.29 | -3.07 | 2.25E-03 | 4.59E-02 |
| DOK6       | -0.55 | 7.88 | -3.07 | 2.25E-03 | 4.59E-02 |

|             |       |       |       |          |          |
|-------------|-------|-------|-------|----------|----------|
| NAPB        | -0.23 | 9.22  | -3.07 | 2.25E-03 | 4.59E-02 |
| SNRNP48     | -0.13 | 8.11  | -3.07 | 2.25E-03 | 4.59E-02 |
| CXorf38     | 0.09  | 6.85  | 3.06  | 2.26E-03 | 4.61E-02 |
| LHX4        | -0.53 | 8.17  | -3.06 | 2.27E-03 | 4.62E-02 |
| BEST3       | 0.23  | 3.70  | 3.06  | 2.27E-03 | 4.62E-02 |
| CHST11      | 0.29  | 7.96  | 3.06  | 2.28E-03 | 4.62E-02 |
| C16orf89    | 0.25  | 6.68  | 3.06  | 2.28E-03 | 4.63E-02 |
| INSRR       | 0.28  | 6.29  | 3.06  | 2.28E-03 | 4.63E-02 |
| SMUG1       | 0.11  | 6.72  | 3.06  | 2.29E-03 | 4.63E-02 |
| RBBP9       | 0.17  | 7.34  | 3.06  | 2.29E-03 | 4.63E-02 |
| NUPR1       | 0.23  | 6.77  | 3.06  | 2.29E-03 | 4.63E-02 |
| MCF2        | -0.22 | 4.33  | -3.06 | 2.30E-03 | 4.64E-02 |
| CITED4      | 0.15  | 5.53  | 3.06  | 2.30E-03 | 4.64E-02 |
| IGF2BP2-AS1 | -0.07 | 3.13  | -3.06 | 2.30E-03 | 4.64E-02 |
| TRIB1       | -0.23 | 8.02  | -3.06 | 2.31E-03 | 4.65E-02 |
| PGBD4       | -0.11 | 7.15  | -3.06 | 2.32E-03 | 4.66E-02 |
| MPPED2      | -0.42 | 8.41  | -3.06 | 2.33E-03 | 4.67E-02 |
| SLC15A5     | -0.08 | 3.68  | -3.06 | 2.33E-03 | 4.67E-02 |
| PARD6B      | -0.20 | 6.90  | -3.05 | 2.34E-03 | 4.68E-02 |
| ADGRG1      | 0.43  | 8.70  | 3.05  | 2.34E-03 | 4.68E-02 |
| SMPD1       | -0.13 | 7.02  | -3.05 | 2.34E-03 | 4.68E-02 |
| CADM3       | -0.25 | 9.35  | -3.05 | 2.34E-03 | 4.68E-02 |
| CNGA3       | 0.50  | 6.31  | 3.05  | 2.35E-03 | 4.69E-02 |
| COLQ        | 0.16  | 6.93  | 3.05  | 2.37E-03 | 4.71E-02 |
| OR2L2       | -0.51 | 5.92  | -3.05 | 2.37E-03 | 4.71E-02 |
| TDH         | -0.08 | 4.72  | -3.05 | 2.38E-03 | 4.72E-02 |
| PNPLA8      | -0.17 | 8.07  | -3.05 | 2.38E-03 | 4.72E-02 |
| VKORC1L1    | -0.11 | 9.21  | -3.05 | 2.38E-03 | 4.72E-02 |
| PAX7        | 0.23  | 5.30  | 3.05  | 2.38E-03 | 4.72E-02 |
| FLJ13224    | 0.08  | 5.51  | 3.05  | 2.40E-03 | 4.74E-02 |
| UGT8        | 0.43  | 6.44  | 3.05  | 2.40E-03 | 4.74E-02 |
| ANKRD16     | 0.11  | 7.26  | 3.05  | 2.40E-03 | 4.74E-02 |
| ZC3H12B     | 0.32  | 5.02  | 3.05  | 2.40E-03 | 4.74E-02 |
| SHKBP1      | 0.17  | 7.35  | 3.05  | 2.41E-03 | 4.74E-02 |
| MTMR8       | 0.29  | 6.16  | 3.04  | 2.41E-03 | 4.74E-02 |
| EXOSC5      | 0.14  | 8.12  | 3.04  | 2.41E-03 | 4.74E-02 |
| SNORD56B    | 0.31  | 4.30  | 3.04  | 2.42E-03 | 4.74E-02 |
| GAD1        | 0.58  | 5.38  | 3.04  | 2.42E-03 | 4.75E-02 |
| HIST1H2BM   | -0.42 | 10.94 | -3.04 | 2.43E-03 | 4.75E-02 |
| OPRD1       | 0.14  | 5.76  | 3.04  | 2.43E-03 | 4.75E-02 |
| OCA2        | 0.36  | 5.77  | 3.04  | 2.43E-03 | 4.75E-02 |
| FES         | 0.11  | 5.32  | 3.04  | 2.45E-03 | 4.77E-02 |
| RTKN        | 0.22  | 6.94  | 3.04  | 2.45E-03 | 4.77E-02 |
| UROD        | 0.12  | 8.00  | 3.04  | 2.45E-03 | 4.77E-02 |
| PPP2R2B     | -0.46 | 7.38  | -3.04 | 2.46E-03 | 4.77E-02 |
| DCAF16      | 0.15  | 9.37  | 3.04  | 2.46E-03 | 4.77E-02 |
| FITM2       | -0.13 | 7.18  | -3.04 | 2.46E-03 | 4.77E-02 |
| EPHX2       | 0.25  | 5.13  | 3.04  | 2.47E-03 | 4.77E-02 |
| GJD2        | 0.34  | 7.62  | 3.04  | 2.47E-03 | 4.77E-02 |
| DNAJC18     | 0.12  | 8.61  | 3.04  | 2.47E-03 | 4.77E-02 |
| RNF2        | -0.12 | 8.79  | -3.04 | 2.47E-03 | 4.78E-02 |
| GABRA1      | -0.49 | 7.58  | -3.04 | 2.48E-03 | 4.80E-02 |
| WDR59       | 0.13  | 8.56  | 3.03  | 2.50E-03 | 4.82E-02 |

|           |       |       |       |          |          |
|-----------|-------|-------|-------|----------|----------|
| CHN2      | -0.54 | 9.72  | -3.03 | 2.50E-03 | 4.82E-02 |
| OPTC      | 0.17  | 5.02  | 3.03  | 2.50E-03 | 4.82E-02 |
| FNBP1     | -0.25 | 9.36  | -3.03 | 2.50E-03 | 4.82E-02 |
| AXIN2     | 0.27  | 7.69  | 3.03  | 2.51E-03 | 4.83E-02 |
| MATK      | -0.16 | 5.61  | -3.03 | 2.51E-03 | 4.83E-02 |
| HECTD4    | -0.17 | 9.38  | -3.03 | 2.52E-03 | 4.83E-02 |
| BDH2      | 0.35  | 5.96  | 3.03  | 2.52E-03 | 4.83E-02 |
| TTLL11    | -0.13 | 6.80  | -3.03 | 2.53E-03 | 4.83E-02 |
| FCGRT     | 0.13  | 7.48  | 3.03  | 2.53E-03 | 4.83E-02 |
| BTBD6     | -0.12 | 6.88  | -3.03 | 2.53E-03 | 4.83E-02 |
| TNFRSF19  | 0.44  | 6.16  | 3.03  | 2.54E-03 | 4.83E-02 |
| GOLPH3L   | 0.14  | 8.25  | 3.03  | 2.54E-03 | 4.83E-02 |
| TTC29     | -0.33 | 4.01  | -3.03 | 2.54E-03 | 4.83E-02 |
| ASMTL     | 0.21  | 5.94  | 3.03  | 2.55E-03 | 4.83E-02 |
| DGKD      | -0.15 | 8.39  | -3.03 | 2.55E-03 | 4.83E-02 |
| WBP11P1   | -0.10 | 5.75  | -3.03 | 2.55E-03 | 4.83E-02 |
| GOLM1     | 0.17  | 10.10 | 3.03  | 2.55E-03 | 4.83E-02 |
| GPLD1     | -0.27 | 6.98  | -3.03 | 2.55E-03 | 4.83E-02 |
| WDR62     | -0.17 | 6.48  | -3.03 | 2.55E-03 | 4.83E-02 |
| SOWAHA    | -0.10 | 5.51  | -3.03 | 2.56E-03 | 4.83E-02 |
| ITPRIP    | 0.22  | 6.23  | 3.03  | 2.56E-03 | 4.83E-02 |
| ZNF449    | 0.11  | 6.38  | 3.03  | 2.56E-03 | 4.83E-02 |
| COL9A1    | -0.13 | 5.48  | -3.03 | 2.57E-03 | 4.83E-02 |
| OR52B4    | -0.09 | 4.78  | -3.02 | 2.58E-03 | 4.85E-02 |
| ZNF671    | -0.22 | 7.14  | -3.02 | 2.58E-03 | 4.85E-02 |
| PITPNM2   | 0.22  | 6.95  | 3.02  | 2.58E-03 | 4.85E-02 |
| STRA6     | 0.24  | 5.36  | 3.02  | 2.60E-03 | 4.87E-02 |
| THOC5     | 0.14  | 8.83  | 3.02  | 2.60E-03 | 4.87E-02 |
| ZBTB34    | -0.14 | 7.80  | -3.02 | 2.60E-03 | 4.87E-02 |
| EFTUD2    | 0.10  | 9.47  | 3.02  | 2.61E-03 | 4.88E-02 |
| ETV6      | 0.30  | 8.24  | 3.02  | 2.61E-03 | 4.88E-02 |
| BRWD3     | -0.10 | 8.78  | -3.02 | 2.61E-03 | 4.88E-02 |
| IBTK      | -0.14 | 8.55  | -3.02 | 2.62E-03 | 4.88E-02 |
| CADPS2    | -0.52 | 7.02  | -3.02 | 2.62E-03 | 4.88E-02 |
| LAP3      | 0.20  | 7.25  | 3.02  | 2.62E-03 | 4.88E-02 |
| SST       | -0.49 | 5.33  | -3.02 | 2.63E-03 | 4.89E-02 |
| OR51B6    | -0.10 | 3.68  | -3.02 | 2.63E-03 | 4.89E-02 |
| PACSIN2   | 0.20  | 8.41  | 3.02  | 2.64E-03 | 4.89E-02 |
| LINC01551 | -0.41 | 5.16  | -3.02 | 2.64E-03 | 4.89E-02 |
| NDUFV2    | 0.08  | 8.32  | 3.02  | 2.65E-03 | 4.89E-02 |
| ZNF597    | -0.25 | 7.23  | -3.02 | 2.65E-03 | 4.89E-02 |
| DGKE      | -0.27 | 6.81  | -3.02 | 2.65E-03 | 4.89E-02 |
| SRBD1     | -0.13 | 8.22  | -3.02 | 2.65E-03 | 4.89E-02 |
| CEND1     | 0.28  | 7.01  | 3.02  | 2.65E-03 | 4.89E-02 |
| NADK2     | 0.13  | 7.88  | 3.02  | 2.65E-03 | 4.89E-02 |
| SLC7A8    | 0.31  | 7.50  | 3.01  | 2.69E-03 | 4.95E-02 |
| SOX13     | 0.29  | 6.21  | 3.01  | 2.69E-03 | 4.95E-02 |
| SERPINI1  | -0.35 | 5.24  | -3.01 | 2.70E-03 | 4.96E-02 |
| PODNL1    | 0.19  | 5.65  | 3.01  | 2.72E-03 | 4.99E-02 |
| NPEPPS    | -0.13 | 9.91  | -3.01 | 2.72E-03 | 4.99E-02 |
| POLH      | -0.11 | 8.38  | -3.01 | 2.73E-03 | 5.00E-02 |
| RSPH1     | 0.13  | 4.89  | 3.01  | 2.73E-03 | 5.00E-02 |

logFC: fold change in expression on log<sub>2</sub> scale; AveExpr: average expression of a gene across all samples; t: t-statistics from regularized t-test; FDR: false discovery rate.

**Table S2.** GO Biological processes enriched in TYA in the entire dataset

| ID         | Name                                               | P-value  | FDR      | Count in Query List | Count in Genome |
|------------|----------------------------------------------------|----------|----------|---------------------|-----------------|
| GO:0007389 | pattern specification process                      | 2.84E-09 | 1.60E-05 | 39                  | 506             |
| GO:0048706 | embryonic skeletal system development              | 4.72E-08 | 1.33E-04 | 18                  | 143             |
| GO:0048704 | embryonic skeletal system morphogenesis            | 1.68E-07 | 2.75E-04 | 15                  | 108             |
| GO:0003002 | regionalization                                    | 2.31E-07 | 2.75E-04 | 30                  | 392             |
| GO:0048568 | embryonic organ development                        | 2.43E-07 | 2.75E-04 | 36                  | 527             |
| GO:0007224 | smoothened signaling pathway                       | 3.20E-07 | 3.02E-04 | 18                  | 162             |
| GO:0048562 | embryonic organ morphogenesis                      | 5.38E-07 | 4.34E-04 | 27                  | 343             |
| GO:0009887 | animal organ morphogenesis                         | 9.89E-07 | 6.73E-04 | 63                  | 1263            |
| GO:0003007 | heart morphogenesis                                | 1.07E-06 | 6.73E-04 | 24                  | 292             |
| GO:0009792 | embryo development ending in birth or egg hatching | 1.73E-06 | 8.99E-04 | 47                  | 850             |
| GO:0007507 | heart development                                  | 1.85E-06 | 8.99E-04 | 41                  | 698             |
| GO:0043009 | chordate embryonic development                     | 1.91E-06 | 8.99E-04 | 46                  | 827             |
| GO:0051216 | cartilage development                              | 2.40E-06 | 1.04E-03 | 20                  | 224             |
| GO:0001501 | skeletal system development                        | 2.61E-06 | 1.05E-03 | 36                  | 583             |
| GO:0030178 | negative regulation of Wnt signaling pathway       | 3.15E-06 | 1.19E-03 | 20                  | 228             |
| GO:0016055 | Wnt signaling pathway                              | 4.66E-06 | 1.50E-03 | 34                  | 549             |
| GO:0048598 | embryonic morphogenesis                            | 4.99E-06 | 1.50E-03 | 40                  | 701             |
| GO:0044782 | cilium organization                                | 5.02E-06 | 1.50E-03 | 30                  | 455             |
| GO:0198738 | cell-cell signaling by wnt                         | 5.04E-06 | 1.50E-03 | 34                  | 551             |
| GO:0048705 | skeletal system morphogenesis                      | 5.84E-06 | 1.65E-03 | 21                  | 258             |
| GO:0003206 | cardiac chamber morphogenesis                      | 6.27E-06 | 1.69E-03 | 15                  | 143             |
| GO:0030111 | regulation of Wnt signaling pathway                | 7.43E-06 | 1.91E-03 | 27                  | 394             |
| GO:0060173 | limb development                                   | 1.17E-05 | 2.76E-03 | 18                  | 208             |
| GO:0048736 | appendage development                              | 1.17E-05 | 2.76E-03 | 18                  | 208             |
| GO:0007018 | microtubule-based movement                         | 1.34E-05 | 3.03E-03 | 39                  | 705             |
| GO:0001578 | microtubule bundle formation                       | 1.61E-05 | 3.51E-03 | 29                  | 459             |
| GO:0042073 | intraciliary transport                             | 1.82E-05 | 3.82E-03 | 28                  | 438             |
| GO:0035567 | non-canonical Wnt signaling pathway                | 2.10E-05 | 4.23E-03 | 15                  | 158             |
| GO:0009790 | embryo development                                 | 2.85E-05 | 5.22E-03 | 60                  | 1316            |
| GO:0061512 | protein localization to cilium                     | 2.96E-05 | 5.22E-03 | 28                  | 450             |
| GO:0003231 | cardiac ventricle development                      | 3.01E-05 | 5.22E-03 | 14                  | 144             |
| GO:0007368 | determination of left/right symmetry               | 3.26E-05 | 5.22E-03 | 14                  | 145             |
| GO:0060070 | canonical Wnt signaling pathway                    | 3.38E-05 | 5.22E-03 | 24                  | 358             |
| GO:0060271 | cilium assembly                                    | 3.51E-05 | 5.22E-03 | 27                  | 430             |
| GO:1905349 | ciliary transition zone assembly                   | 3.51E-05 | 5.22E-03 | 27                  | 430             |
| GO:0035735 | intraciliary transport involved in cilium assembly | 3.51E-05 | 5.22E-03 | 27                  | 430             |

|            |                                                                         |          |          |    |      |
|------------|-------------------------------------------------------------------------|----------|----------|----|------|
| GO:0035082 | axoneme assembly                                                        | 3.51E-05 | 5.22E-03 | 27 | 430  |
| GO:0097712 | vesicle targeting, trans-Golgi to periciliary membrane compartment      | 3.51E-05 | 5.22E-03 | 27 | 430  |
| GO:0099118 | microtubule-based protein transport                                     | 3.75E-05 | 5.30E-03 | 28 | 456  |
| GO:0098840 | protein transport along microtubule                                     | 3.75E-05 | 5.30E-03 | 28 | 456  |
| GO:0090090 | negative regulation of canonical Wnt signaling pathway                  | 4.94E-05 | 6.81E-03 | 16 | 190  |
| GO:0003205 | cardiac chamber development                                             | 5.96E-05 | 8.02E-03 | 16 | 193  |
| GO:0060972 | left/right pattern formation                                            | 6.23E-05 | 8.18E-03 | 6  | 27   |
| GO:0009855 | determination of bilateral symmetry                                     | 6.79E-05 | 8.73E-03 | 14 | 155  |
| GO:0009799 | specification of symmetry                                               | 7.29E-05 | 9.15E-03 | 14 | 156  |
| GO:0048199 | vesicle targeting, to, from or within Golgi                             | 7.58E-05 | 9.31E-03 | 29 | 500  |
| GO:0048729 | tissue morphogenesis                                                    | 7.79E-05 | 9.37E-03 | 43 | 874  |
| GO:0060415 | muscle tissue morphogenesis                                             | 8.32E-05 | 9.79E-03 | 10 | 85   |
| GO:0060828 | regulation of canonical Wnt signaling pathway                           | 8.52E-05 | 9.83E-03 | 21 | 309  |
| GO:0072359 | circulatory system development                                          | 8.83E-05 | 9.98E-03 | 59 | 1340 |
| GO:0002009 | morphogenesis of an epithelium                                          | 1.16E-04 | 1.26E-02 | 35 | 670  |
| GO:2000050 | regulation of non-canonical Wnt signaling pathway                       | 1.17E-04 | 1.26E-02 | 6  | 30   |
| GO:0009063 | cellular amino acid catabolic process                                   | 1.18E-04 | 1.26E-02 | 11 | 106  |
| GO:0060537 | muscle tissue development                                               | 1.21E-04 | 1.26E-02 | 28 | 488  |
| GO:0099111 | microtubule-based transport                                             | 1.23E-04 | 1.27E-02 | 31 | 566  |
| GO:0014706 | striated muscle tissue development                                      | 1.26E-04 | 1.27E-02 | 27 | 464  |
| GO:1905114 | cell surface receptor signaling pathway involved in cell-cell signaling | 1.38E-04 | 1.37E-02 | 35 | 676  |
| GO:0003341 | cilium movement                                                         | 1.44E-04 | 1.38E-02 | 16 | 208  |
| GO:0006903 | vesicle targeting                                                       | 1.44E-04 | 1.38E-02 | 29 | 519  |
| GO:0007517 | muscle organ development                                                | 1.50E-04 | 1.41E-02 | 24 | 394  |
| GO:0048644 | muscle organ morphogenesis                                              | 1.78E-04 | 1.65E-02 | 10 | 93   |
| GO:0010970 | transport along microtubule                                             | 1.81E-04 | 1.65E-02 | 30 | 552  |
| GO:0001756 | somitogenesis                                                           | 1.97E-04 | 1.77E-02 | 9  | 77   |
| GO:0061448 | connective tissue development                                           | 2.10E-04 | 1.86E-02 | 20 | 306  |
| GO:0048645 | animal organ formation                                                  | 2.18E-04 | 1.89E-02 | 9  | 78   |
| GO:0009952 | anterior/posterior pattern specification                                | 2.31E-04 | 1.95E-02 | 17 | 239  |
| GO:0061053 | somite development                                                      | 2.31E-04 | 1.95E-02 | 10 | 96   |
| GO:0003208 | cardiac ventricle morphogenesis                                         | 2.64E-04 | 2.20E-02 | 9  | 80   |
| GO:0008589 | regulation of smoothened signaling pathway                              | 2.74E-04 | 2.24E-02 | 10 | 98   |
| GO:0051650 | establishment of vesicle localization                                   | 3.70E-04 | 2.99E-02 | 32 | 630  |
| GO:0060350 | endochondral bone morphogenesis                                         | 3.83E-04 | 3.05E-02 | 8  | 67   |
| GO:0048738 | cardiac muscle tissue development                                       | 4.40E-04 | 3.46E-02 | 18 | 276  |
| GO:0007223 | Wnt signaling pathway, calcium modulating pathway                       | 4.54E-04 | 3.51E-02 | 6  | 38   |
| GO:0030705 | cytoskeleton-dependent intracellular transport                          | 4.93E-04 | 3.76E-02 | 30 | 586  |
| GO:0060351 | cartilage development involved in endochondral bone morphogenesis       | 5.24E-04 | 3.92E-02 | 6  | 39   |
| GO:0048565 | digestive tract development                                             | 5.27E-04 | 3.92E-02 | 12 | 146  |



|            |                                                   |          |          |    |      |
|------------|---------------------------------------------------|----------|----------|----|------|
| GO:0007267 | cell-cell signaling                               | 5.57E-04 | 4.09E-02 | 76 | 1971 |
| GO:0051648 | vesicle localization                              | 5.99E-04 | 4.18E-02 | 32 | 648  |
| GO:0060971 | embryonic heart tube left/right pattern formation | 5.99E-04 | 4.18E-02 | 3  | 7    |
| GO:0014807 | regulation of somitogenesis                       | 5.99E-04 | 4.18E-02 | 3  | 7    |
| GO:0006552 | leucine catabolic process                         | 5.99E-04 | 4.18E-02 | 3  | 7    |
| GO:0060349 | bone morphogenesis                                | 6.92E-04 | 4.77E-02 | 10 | 110  |
| GO:0006540 | glutamate decarboxylation to succinate            | 7.22E-04 | 4.91E-02 | 2  | 2    |
| GO:0035282 | segmentation                                      | 7.43E-04 | 4.95E-02 | 10 | 111  |
| GO:0048546 | digestive tract morphogenesis                     | 7.44E-04 | 4.95E-02 | 7  | 57   |

**Table S3.** GO Biological processes enriched in TYA of SHH tumours by GSEA

| NAME                                                  | SIZE | ES   | NES  | FDR      |
|-------------------------------------------------------|------|------|------|----------|
| GO_AXONEME_ASSEMBLY                                   | 63   | 0.78 | 2.42 | 0.00E+00 |
| GO_CILIUM_MOVEMENT                                    | 135  | 0.67 | 2.30 | 0.00E+00 |
| GO_MICROTUBULE_BUNDLE_FORMATION                       | 93   | 0.68 | 2.23 | 0.00E+00 |
| GO_CILIUM_ORGANIZATION                                | 347  | 0.60 | 2.23 | 0.00E+00 |
| GO_CILIUM_OR_FLAGELLUM_DEPENDENT_CELL_MOTILITY        | 109  | 0.66 | 2.21 | 0.00E+00 |
| GO_RIBOSOME_BIOGENESIS                                | 284  | 0.59 | 2.17 | 9.03E-05 |
| GO_INTRACILIARY_TRANSPORT                             | 50   | 0.71 | 2.15 | 7.74E-05 |
| GO_PROTEIN_LOCALIZATION_TO_CILIUM                     | 51   | 0.71 | 2.14 | 6.77E-05 |
| GO_RRNA_MODIFICATION                                  | 36   | 0.75 | 2.13 | 6.02E-05 |
| GO_NCRNA_PROCESSING                                   | 358  | 0.56 | 2.12 | 5.42E-05 |
| GO_AXONEMAL_DYNEIN_COMPLEX_ASSEMBLY                   | 28   | 0.77 | 2.12 | 4.93E-05 |
| GO_EXTRACELLULAR_TRANSPORT                            | 26   | 0.79 | 2.09 | 4.52E-05 |
| GO_RRNA_METABOLIC_PROCESS                             | 221  | 0.57 | 2.07 | 1.27E-04 |
| GO_RIBONUCLEOPROTEIN_COMPLEX_BIOGENESIS               | 417  | 0.54 | 2.06 | 1.58E-04 |
| GO_MITOCHONDRIAL_GENE_EXPRESSION                      | 157  | 0.58 | 2.05 | 1.47E-04 |
| GO_NCRNA_METABOLIC_PROCESS                            | 429  | 0.54 | 2.05 | 1.73E-04 |
| GO_MICROTUBULE_BASED_MOVEMENT                         | 333  | 0.55 | 2.04 | 1.63E-04 |
| GO_NON_MOTILE_CILIUM_ASSEMBLY                         | 49   | 0.70 | 2.03 | 2.15E-04 |
| GO_RNA_MODIFICATION                                   | 153  | 0.58 | 2.02 | 3.19E-04 |
| GO_SPECIFICATION_OF_SYMMETRY                          | 126  | 0.57 | 1.99 | 7.47E-04 |
| GO_TRNA_PROCESSING                                    | 119  | 0.58 | 1.99 | 7.38E-04 |
| GO_SPERM_MOTILITY                                     | 84   | 0.61 | 1.99 | 7.80E-04 |
| GO_INTRACILIARY_TRANSPORT_INVOLVED_IN_CILIUM_ASSEMBLY | 40   | 0.68 | 1.97 | 1.13E-03 |
| GO_MITOCHONDRIAL_TRANSLATION                          | 130  | 0.58 | 1.97 | 1.08E-03 |
| GO_RRNA_METHYLATION                                   | 24   | 0.76 | 1.97 | 1.04E-03 |
| GO_TRANSLATIONAL_TERMINATION                          | 100  | 0.59 | 1.96 | 1.19E-03 |
| GO_PROTEIN_TRANSPORT_ALONG_MICROTUBULE                | 64   | 0.62 | 1.95 | 1.43E-03 |
| GO_TRNA_METABOLIC_PROCESS                             | 157  | 0.55 | 1.94 | 1.90E-03 |
| GO_MATURATION_OF_SSU_RRNA                             | 47   | 0.65 | 1.92 | 2.73E-03 |
| GO_MOTILE_CILIUM_ASSEMBLY                             | 20   | 0.77 | 1.92 | 2.88E-03 |
| GO_TRNA_MODIFICATION                                  | 83   | 0.59 | 1.92 | 2.89E-03 |
| GO_MICROTUBULE_BASED_TRANSPORT                        | 171  | 0.53 | 1.91 | 3.27E-03 |

|                                                                                          |     |      |      |          |
|------------------------------------------------------------------------------------------|-----|------|------|----------|
| GO_MATURATION_OF_SSU_RRNA_FROM_TRICISTRONIC_RRNA_TRANSCRIPT_SSU_RRNA_5_8S_RRNA_LSU_RRNA  | 34  | 0.67 | 1.89 | 5.37E-03 |
| GO_CLEAVAGE_INVOLVED_IN_RRNA_PROCESSING                                                  | 27  | 0.70 | 1.89 | 5.26E-03 |
| GO_MITOCHONDRIAL_TRANSLATIONAL_TERMINATION                                               | 86  | 0.58 | 1.87 | 6.53E-03 |
| GO_VENTRICULAR_SYSTEM_DEVELOPMENT                                                        | 29  | 0.69 | 1.86 | 8.07E-03 |
| GO_RIBOSOMAL_SMALL_SUBUNIT_BIOGENESIS                                                    | 68  | 0.59 | 1.85 | 9.17E-03 |
| GO_RIBOSOMAL_LARGE_SUBUNIT_BIOGENESIS                                                    | 69  | 0.58 | 1.84 | 1.12E-02 |
| GO_SPLICEOSOMAL_SNRNP_ASSEMBLY                                                           | 46  | 0.62 | 1.84 | 1.11E-02 |
| GO_MATURATION_OF_5_8S_RRNA_FROM_TRICISTRONIC_RRNA_TRANSCRIPT_SSU_RRNA_5_8S_RRNA_LSU_RRNA | 24  | 0.70 | 1.82 | 1.33E-02 |
| GO_RNA_METHYLATION                                                                       | 76  | 0.57 | 1.79 | 2.47E-02 |
| GO_PSEUDOURIDINE_SYNTHESIS                                                               | 18  | 0.73 | 1.77 | 3.20E-02 |
| GO_SPERM_AXONEME_ASSEMBLY                                                                | 16  | 0.75 | 1.76 | 3.65E-02 |
| GO_PREASSEMBLY_OF_GPI_ANCHOR_IN_ER_MEMBRANE                                              | 16  | 0.74 | 1.75 | 4.03E-02 |
| GO_EMBRYONIC_SKELETAL_SYSTEM_MORPHOGENESIS                                               | 95  | 0.53 | 1.75 | 3.97E-02 |
| GO_SMOOTHENED_SIGNALING_PATHWAY                                                          | 136 | 0.51 | 1.75 | 4.10E-02 |
| GO_MATURATION_OF_LSU_RRNA                                                                | 28  | 0.65 | 1.74 | 4.35E-02 |

**Table S4.** List of DMPs that are common across three MB subgroups

|            |     |           |         | SHH        |          | Group 3    |          | Group 4    |          |
|------------|-----|-----------|---------|------------|----------|------------|----------|------------|----------|
| Probe      | Chr | Position  | Gene    | delta beta | FDR      | delta beta | FDR      | delta beta | FDR      |
| cg03522107 | 1   | 16553329  |         | 0.22       | 1.11E-03 | 0.33       | 1.45E-02 | 0.10       | 8.87E-03 |
| cg14429204 | 1   | 16553327  |         | 0.22       | 3.04E-03 | 0.33       | 1.89E-02 | 0.09       | 8.72E-03 |
| cg23279117 | 1   | 111813509 |         | 0.17       | 1.41E-02 | 0.19       | 4.26E-02 | 0.07       | 2.56E-02 |
| cg24851854 | 1   | 59042275  | TACSTD2 | 0.26       | 3.45E-03 | 0.36       | 4.76E-02 | 0.27       | 3.68E-07 |
| cg07537370 | 2   | 27531124  | UCN     | 0.23       | 4.77E-04 | 0.15       | 4.49E-02 | 0.02       | 5.92E-03 |
| cg20438306 | 4   | 41747092  | PHOX2B  | 0.23       | 4.43E-03 | 0.31       | 4.09E-02 | 0.19       | 4.31E-03 |
| cg16105676 | 6   | 108497424 | NR2E1   | 0.29       | 7.72E-04 | 0.26       | 4.08E-02 | 0.14       | 3.74E-03 |
| cg05809668 | 7   | 35301188  |         | 0.37       | 4.54E-04 | 0.37       | 4.18E-02 | 0.18       | 4.34E-02 |
| cg18177414 | 7   | 149389929 |         | 0.32       | 4.51E-04 | 0.31       | 2.82E-02 | 0.28       | 1.11E-05 |
| cg23865240 | 7   | 27134109  | HOXA1   | 0.31       | 2.02E-04 | 0.29       | 4.33E-02 | 0.20       | 2.13E-04 |
| cg07262635 | 10  | 18689378  | CACNB2  | 0.20       | 8.33E-03 | 0.09       | 7.02E-03 | 0.06       | 2.83E-02 |
| cg12289251 | 10  | 18689471  | CACNB2  | 0.19       | 4.66E-02 | 0.11       | 1.84E-02 | 0.10       | 2.49E-02 |
| cg09290705 | 15  | 60285508  |         | 0.23       | 5.53E-03 | 0.24       | 3.02E-02 | 0.16       | 4.52E-02 |

**Table S5.** List of DMPs between TYA and other age groups in SHH tumours

| ProbeID    | CHR | MAPINFO   | Gene    | delta Beta | P_Value  | FDR      |
|------------|-----|-----------|---------|------------|----------|----------|
| cg01740424 | 20  | 3758584   | SPEF1   | 0.32       | 6.96E-11 | 1.44E-05 |
| cg24807850 | 1   | 3165391   | PRDM16  | 0.29       | 1.33E-10 | 1.44E-05 |
| cg05921905 | 7   | 27142527  | HOXA2   | 0.35       | 1.35E-10 | 1.44E-05 |
| cg04452311 | 2   | 176936377 |         | 0.29       | 3.48E-10 | 2.45E-05 |
| cg02979457 | 7   | 27142547  | HOXA2   | 0.32       | 6.10E-10 | 2.45E-05 |
| cg06786372 | 7   | 27141388  | HOXA2   | 0.34       | 7.64E-10 | 2.45E-05 |
| cg04593780 | 16  | 3150150   |         | 0.35       | 7.80E-10 | 2.45E-05 |
| cg21119525 | 1   | 2136847   | C1orf86 | 0.31       | 8.45E-10 | 2.45E-05 |
| cg04737131 | 7   | 27142708  | HOXA2   | 0.34       | 8.67E-10 | 2.45E-05 |
| cg13661519 | 7   | 27141088  | HOXA2   | 0.33       | 8.87E-10 | 2.45E-05 |

|            |    |           |           |       |          |          |
|------------|----|-----------|-----------|-------|----------|----------|
| cg04187935 | 4  | 571090    |           | 0.26  | 8.88E-10 | 2.45E-05 |
| cg02803819 | 7  | 27141067  | HOXA2     | 0.37  | 9.78E-10 | 2.45E-05 |
| cg06769202 | 7  | 27142535  | HOXA2     | 0.31  | 9.94E-10 | 2.45E-05 |
| cg07522913 | 7  | 27150403  | HOXA3     | 0.35  | 1.20E-09 | 2.71E-05 |
| cg16296290 | 1  | 2136845   | C1orf86   | 0.36  | 1.27E-09 | 2.71E-05 |
| cg21464565 | 7  | 27141139  | HOXA2     | 0.31  | 1.53E-09 | 2.80E-05 |
| cg25598840 | 7  | 27142618  | HOXA2     | 0.32  | 1.53E-09 | 2.80E-05 |
| cg03010761 | 12 | 104608278 | TXNRD1    | -0.21 | 1.77E-09 | 2.80E-05 |
| cg23217283 | 6  | 5039003   |           | -0.21 | 1.85E-09 | 2.80E-05 |
| cg17800708 | 7  | 27148204  | HOXA3     | 0.31  | 1.94E-09 | 2.80E-05 |
| cg01429449 | 2  | 176936397 |           | 0.30  | 1.99E-09 | 2.80E-05 |
| cg08955995 | 19 | 42503412  | GRIK5     | 0.39  | 2.00E-09 | 2.80E-05 |
| cg04599965 | 4  | 571042    |           | 0.36  | 2.36E-09 | 3.15E-05 |
| cg04046931 | 8  | 142452416 | FLJ43860  | -0.35 | 2.57E-09 | 3.30E-05 |
| cg06520675 | 10 | 102996310 | FLJ41350  | 0.39  | 3.16E-09 | 3.90E-05 |
| cg20141652 | 19 | 19221574  | SLC25A42  | 0.29  | 3.59E-09 | 4.14E-05 |
| cg00845598 | 8  | 142452378 | FLJ43860  | -0.33 | 3.61E-09 | 4.14E-05 |
| cg22943986 | 7  | 27142700  | HOXA2     | 0.34  | 4.26E-09 | 4.61E-05 |
| cg03763508 | 7  | 27140942  | HOXA2     | 0.35  | 4.42E-09 | 4.61E-05 |
| cg25124406 | 12 | 89744662  | DUSP6     | 0.40  | 4.62E-09 | 4.61E-05 |
| cg17353412 | 7  | 27141774  | HOXA2     | 0.30  | 4.69E-09 | 4.61E-05 |
| cg02693607 | 7  | 27150598  | HOXA3     | 0.38  | 4.73E-09 | 4.61E-05 |
| cg19048532 | 7  | 27148002  | HOXA3     | 0.31  | 4.89E-09 | 4.62E-05 |
| cg12475590 | 13 | 21288062  | IL17D     | -0.26 | 5.76E-09 | 5.16E-05 |
| cg25123566 | 12 | 47610734  | FAM113B   | -0.28 | 6.03E-09 | 5.16E-05 |
| cg19585433 | 12 | 133658083 | ZNF140    | -0.23 | 6.22E-09 | 5.16E-05 |
| cg20670361 | 1  | 25258679  | RUNX3     | 0.23  | 6.74E-09 | 5.16E-05 |
| cg04092231 | 11 | 122852412 | BSX       | 0.20  | 6.78E-09 | 5.16E-05 |
| cg08544331 | 1  | 25246922  | RUNX3     | -0.24 | 6.96E-09 | 5.16E-05 |
| cg26297530 | 19 | 7680259   | KIAA1543  | -0.30 | 7.14E-09 | 5.16E-05 |
| cg00740368 | 19 | 51232007  |           | 0.31  | 7.27E-09 | 5.16E-05 |
| cg12810626 | 1  | 160764664 | LY9       | -0.33 | 7.31E-09 | 5.16E-05 |
| cg05030680 | 4  | 111542366 | PITX2     | 0.24  | 7.39E-09 | 5.16E-05 |
| cg10777495 | 19 | 7680231   | KIAA1543  | -0.36 | 7.67E-09 | 5.16E-05 |
| cg02595575 | 19 | 19221316  | SLC25A42  | 0.33  | 7.69E-09 | 5.16E-05 |
| cg02078690 | 11 | 122852454 | BSX       | 0.26  | 7.72E-09 | 5.16E-05 |
| cg04481096 | 7  | 27142100  | HOXA2     | 0.35  | 7.98E-09 | 5.17E-05 |
| cg09323727 | 2  | 176936436 |           | 0.40  | 8.05E-09 | 5.17E-05 |
| cg03053579 | 10 | 102987483 | LBX1      | 0.39  | 8.32E-09 | 5.22E-05 |
| cg13366863 | 5  | 177505451 |           | -0.22 | 8.45E-09 | 5.22E-05 |
| cg20087093 | 7  | 27142799  | HOXA2     | 0.30  | 8.97E-09 | 5.33E-05 |
| cg04377618 | 20 | 25128211  | LOC284798 | -0.23 | 9.87E-09 | 5.46E-05 |
| cg03743720 | 2  | 241460002 | ANKMY1    | 0.29  | 1.00E-08 | 5.46E-05 |
| cg20747380 | 7  | 27142275  | HOXA2     | 0.29  | 1.00E-08 | 5.46E-05 |
| cg04965934 | 2  | 73151201  | EMX1      | 0.27  | 1.01E-08 | 5.46E-05 |
| cg09144964 | 7  | 27150262  | HOXA3     | 0.27  | 1.08E-08 | 5.69E-05 |
| cg06806862 | 3  | 184934396 | EHHADH    | -0.29 | 1.10E-08 | 5.70E-05 |
| cg04524477 | 17 | 41363597  | NBR1      | 0.34  | 1.13E-08 | 5.78E-05 |
| cg19094872 | 2  | 242065898 | PASK      | -0.22 | 1.16E-08 | 5.80E-05 |
| cg26746936 | 19 | 42503392  | GRIK5     | 0.34  | 1.18E-08 | 5.82E-05 |
| cg00459623 | 2  | 176936581 |           | 0.41  | 1.20E-08 | 5.82E-05 |
| cg16909733 | 2  | 241459847 | ANKMY1    | 0.32  | 1.29E-08 | 6.17E-05 |
| cg05320183 | 20 | 3758973   | SPEF1     | 0.30  | 1.35E-08 | 6.34E-05 |
| cg07050616 | 10 | 102996197 | FLJ41350  | 0.37  | 1.36E-08 | 6.34E-05 |
| cg10997718 | 2  | 162275690 | TBR1      | 0.33  | 1.38E-08 | 6.34E-05 |
| cg06161964 | 5  | 1884513   |           | 0.24  | 1.42E-08 | 6.40E-05 |
| cg23865994 | 20 | 3758499   | SPEF1     | 0.36  | 1.43E-08 | 6.40E-05 |
| cg03430526 | 8  | 27942055  | C8orf80   | -0.28 | 1.56E-08 | 6.81E-05 |
| cg13112154 | 10 | 102996565 | FLJ41350  | 0.35  | 1.57E-08 | 6.81E-05 |
| cg07515422 | 19 | 40993713  | SPTBN4    | 0.33  | 1.72E-08 | 7.22E-05 |
| cg00333483 | 17 | 79504180  |           | 0.32  | 1.73E-08 | 7.22E-05 |
| cg04630448 | 7  | 23373488  | IGF2BP3   | -0.27 | 1.77E-08 | 7.30E-05 |
| cg13718729 | 9  | 140056619 | GRIN1     | 0.37  | 1.85E-08 | 7.49E-05 |
| cg10141717 | 6  | 30099252  |           | -0.27 | 1.87E-08 | 7.49E-05 |
| cg02367696 | 10 | 102996464 | FLJ41350  | 0.37  | 1.98E-08 | 7.80E-05 |
| cg03265671 | 1  | 156616554 | BCAN      | 0.28  | 2.04E-08 | 7.80E-05 |

|            |    |           |          |       |          |          |
|------------|----|-----------|----------|-------|----------|----------|
| cg11720896 | 17 | 29914487  |          | 0.25  | 2.06E-08 | 7.80E-05 |
| cg11342106 | 11 | 73020351  | ARHGEF17 | 0.30  | 2.06E-08 | 7.80E-05 |
| cg10665321 | 19 | 19221392  | SLC25A42 | 0.35  | 2.07E-08 | 7.80E-05 |
| cg22316269 | 4  | 571371    |          | 0.31  | 2.22E-08 | 8.01E-05 |
| cg07996594 | 1  | 25257505  | RUNX3    | 0.36  | 2.24E-08 | 8.01E-05 |
| cg00018128 | 2  | 162275746 | TBR1     | 0.37  | 2.25E-08 | 8.01E-05 |
| cg02008651 | 14 | 29247148  | C14orf23 | 0.33  | 2.25E-08 | 8.01E-05 |
| cg17485141 | 2  | 42566556  |          | -0.31 | 2.27E-08 | 8.01E-05 |
| cg27314569 | 11 | 122852461 | BSX      | 0.23  | 2.29E-08 | 8.01E-05 |
| cg02498311 | 11 | 73020358  | ARHGEF17 | 0.31  | 2.29E-08 | 8.01E-05 |
| cg15508809 | 14 | 29231309  |          | 0.35  | 2.34E-08 | 8.07E-05 |
| cg04221877 | 1  | 25257515  | RUNX3    | 0.29  | 2.38E-08 | 8.14E-05 |
| cg23442209 | 10 | 102995987 | FLJ41350 | 0.32  | 2.41E-08 | 8.15E-05 |
| cg09871315 | 7  | 27142682  | HOXA2    | 0.31  | 2.44E-08 | 8.15E-05 |
| cg15731655 | 12 | 54357604  | HOTAIR   | 0.35  | 2.59E-08 | 8.45E-05 |
| cg27359374 | 6  | 158375774 |          | -0.29 | 2.64E-08 | 8.45E-05 |
| cg13903070 | 1  | 61456527  |          | -0.31 | 2.66E-08 | 8.45E-05 |
| cg11051752 | 6  | 158375814 |          | -0.24 | 2.71E-08 | 8.45E-05 |
| cg05969808 | 10 | 102978788 |          | 0.30  | 2.73E-08 | 8.45E-05 |
| cg26702958 | 10 | 102996254 | FLJ41350 | 0.36  | 2.74E-08 | 8.45E-05 |
| cg14036830 | 19 | 42503207  | GRIK5    | 0.39  | 2.82E-08 | 8.56E-05 |
| cg01357135 | 3  | 160475128 | PPM1L    | 0.25  | 2.87E-08 | 8.56E-05 |
| cg26069745 | 7  | 27142200  | HOXA2    | 0.28  | 2.88E-08 | 8.56E-05 |
| cg13365524 | 6  | 100902093 | SIM1     | 0.36  | 2.88E-08 | 8.56E-05 |
| cg24717061 | 10 | 102978443 |          | 0.23  | 2.97E-08 | 8.63E-05 |
| cg12821539 | 13 | 100642775 |          | 0.34  | 3.01E-08 | 8.63E-05 |
| cg19107469 | 20 | 55200445  |          | 0.26  | 3.06E-08 | 8.63E-05 |
| cg23922454 | 12 | 113910545 | LHX5     | 0.28  | 3.06E-08 | 8.63E-05 |
| cg13298153 | 7  | 5123143   |          | -0.32 | 3.11E-08 | 8.69E-05 |
| cg24394172 | 4  | 46995203  | GABRA4   | 0.37  | 3.20E-08 | 8.83E-05 |
| cg09923978 | 11 | 58207761  | OR5B12   | -0.31 | 3.29E-08 | 8.83E-05 |
| cg02470874 | 3  | 160475336 | PPM1L    | 0.25  | 3.30E-08 | 8.83E-05 |
| cg27187375 | 1  | 155912569 | RXFP4    | -0.23 | 3.32E-08 | 8.83E-05 |
| cg04074066 | 9  | 139565154 | EGFL7    | -0.26 | 3.32E-08 | 8.83E-05 |
| cg26997880 | 6  | 32055370  | TNXB     | 0.34  | 3.33E-08 | 8.83E-05 |
| cg23206851 | 7  | 27143046  | HOXA2    | 0.28  | 3.42E-08 | 8.99E-05 |
| cg09169953 | 4  | 111555102 | PITX2    | 0.33  | 3.48E-08 | 9.10E-05 |
| cg07201017 | 10 | 102996571 | FLJ41350 | 0.34  | 3.53E-08 | 9.10E-05 |
| cg05574272 | 5  | 33938213  | RXFP3    | 0.29  | 3.54E-08 | 9.10E-05 |
| cg11538641 | 6  | 100902258 | SIM1     | 0.35  | 3.59E-08 | 9.16E-05 |
| cg05072470 | 13 | 100643858 |          | 0.34  | 3.76E-08 | 9.26E-05 |
| cg27156584 | 11 | 58207784  | OR5B12   | -0.32 | 3.79E-08 | 9.26E-05 |
| cg21873674 | 3  | 13689339  |          | -0.24 | 3.82E-08 | 9.26E-05 |
| cg00606841 | 21 | 40757691  | WRB      | -0.21 | 3.82E-08 | 9.26E-05 |
| cg20234976 | 6  | 100895907 | SIM1     | 0.30  | 3.83E-08 | 9.26E-05 |
| cg22132509 | 3  | 160475102 | PPM1L    | 0.24  | 3.89E-08 | 9.29E-05 |
| cg22241820 | 15 | 68122574  | LBXCOR1  | 0.23  | 3.90E-08 | 9.29E-05 |
| cg04056576 | 3  | 160475090 | PPM1L    | 0.27  | 3.95E-08 | 9.29E-05 |
| cg06476685 | 2  | 241459638 | ANKMY1   | 0.32  | 3.98E-08 | 9.29E-05 |
| cg08074534 | 6  | 100895143 | SIM1     | 0.37  | 3.99E-08 | 9.29E-05 |
| cg19598584 | 7  | 27142810  | HOXA2    | 0.30  | 4.43E-08 | 1.01E-04 |
| cg09173378 | 1  | 196370245 | KCNT2    | -0.28 | 4.45E-08 | 1.01E-04 |
| cg07917609 | 5  | 33938225  | RXFP3    | 0.31  | 4.48E-08 | 1.01E-04 |
| cg15183092 | 7  | 150710447 | ATG9B    | 0.28  | 4.52E-08 | 1.01E-04 |
| cg08377924 | 17 | 41363628  | NBR1     | 0.37  | 4.66E-08 | 1.03E-04 |
| cg15014975 | 1  | 25257547  | RUNX3    | 0.36  | 4.81E-08 | 1.06E-04 |
| cg11823230 | 6  | 32055385  | TNXB     | 0.33  | 4.83E-08 | 1.06E-04 |
| cg04804604 | 7  | 156140609 |          | -0.35 | 4.92E-08 | 1.06E-04 |
| cg09864457 | 19 | 42502731  | GRIK5    | 0.33  | 4.92E-08 | 1.06E-04 |
| cg14717557 | 6  | 100895618 | SIM1     | 0.39  | 4.95E-08 | 1.06E-04 |
| cg11100933 | 5  | 1174646   |          | 0.23  | 4.96E-08 | 1.06E-04 |
| cg26684131 | 6  | 32410365  | HLA-DRA  | -0.28 | 5.10E-08 | 1.08E-04 |
| cg07080050 | 12 | 54413345  | HOXC4    | 0.28  | 5.18E-08 | 1.08E-04 |
| cg11174855 | 10 | 134598352 | NKX6-2   | 0.39  | 5.19E-08 | 1.08E-04 |
| cg07704627 | 17 | 77777173  |          | 0.25  | 5.20E-08 | 1.08E-04 |
| cg03151469 | 2  | 176936091 |          | 0.22  | 5.36E-08 | 1.10E-04 |

|            |    |           |          |       |          |          |
|------------|----|-----------|----------|-------|----------|----------|
| cg21233003 | 9  | 140057464 | GRIN1    | 0.38  | 5.40E-08 | 1.10E-04 |
| cg24205914 | 10 | 62761575  | RHOBTB1  | 0.26  | 5.43E-08 | 1.10E-04 |
| cg02179652 | 11 | 122852429 | BSX      | 0.21  | 5.54E-08 | 1.12E-04 |
| cg18004701 | 7  | 157481628 | PTPRN2   | 0.26  | 5.65E-08 | 1.13E-04 |
| cg16964025 | 7  | 157482215 | PTPRN2   | 0.32  | 5.71E-08 | 1.13E-04 |
| cg12641240 | 8  | 638330    | ERICH1   | 0.39  | 5.78E-08 | 1.14E-04 |
| cg03221366 | 12 | 131943548 |          | -0.37 | 5.92E-08 | 1.16E-04 |
| cg07153966 | 7  | 27147590  | HOXA3    | 0.32  | 5.96E-08 | 1.16E-04 |
| cg02646021 | 2  | 223176846 |          | 0.31  | 6.12E-08 | 1.18E-04 |
| cg07211212 | 20 | 55200146  |          | 0.23  | 6.30E-08 | 1.20E-04 |
| cg06055873 | 7  | 27142204  | HOXA2    | 0.29  | 6.40E-08 | 1.21E-04 |
| cg05483184 | 6  | 32055393  | TNXB     | 0.33  | 6.40E-08 | 1.21E-04 |
| cg24469980 | 1  | 221064953 |          | 0.34  | 6.56E-08 | 1.23E-04 |
| cg20208133 | 20 | 39311637  |          | 0.32  | 6.75E-08 | 1.26E-04 |
| cg02124887 | 5  | 1174666   |          | 0.24  | 6.83E-08 | 1.26E-04 |
| cg19019849 | 4  | 13533145  |          | 0.24  | 6.84E-08 | 1.26E-04 |
| cg04132452 | 3  | 160475035 | PPM1L    | 0.22  | 7.07E-08 | 1.28E-04 |
| cg14362312 | 9  | 136294076 | ADAMTS13 | 0.37  | 7.07E-08 | 1.28E-04 |
| cg04649852 | 16 | 29229650  |          | -0.24 | 7.08E-08 | 1.28E-04 |
| cg22303045 | 6  | 100917022 |          | 0.33  | 7.18E-08 | 1.29E-04 |
| cg04460816 | 19 | 19221572  | SLC25A42 | 0.22  | 7.30E-08 | 1.29E-04 |
| cg06622953 | 12 | 54357752  | HOTAIR   | 0.25  | 7.33E-08 | 1.29E-04 |
| cg05879418 | 5  | 54455955  | CDC20B   | 0.39  | 7.41E-08 | 1.30E-04 |
| cg01383274 | 2  | 7571241   |          | 0.30  | 7.53E-08 | 1.30E-04 |
| cg05494604 | 13 | 23733862  |          | 0.39  | 7.60E-08 | 1.30E-04 |
| cg05638359 | 1  | 190444387 | FAM5C    | 0.30  | 7.60E-08 | 1.30E-04 |
| cg18987335 | 2  | 177039862 |          | 0.25  | 7.62E-08 | 1.30E-04 |
| cg08508814 | 5  | 54455701  | CDC20B   | 0.37  | 7.73E-08 | 1.31E-04 |
| cg16184803 | 4  | 111542444 | PITX2    | 0.26  | 7.80E-08 | 1.32E-04 |
| cg10440696 | 11 | 5809911   | OR52N1   | -0.31 | 7.82E-08 | 1.32E-04 |
| cg10350492 | 5  | 33937673  | RXFP3    | 0.33  | 7.91E-08 | 1.32E-04 |
| cg05886546 | 17 | 40936498  | WNK4     | 0.33  | 7.93E-08 | 1.32E-04 |
| cg01242903 | 12 | 89744877  | DUSP6    | 0.34  | 8.15E-08 | 1.35E-04 |
| cg20134215 | 6  | 100441407 | MCHR2    | 0.30  | 8.19E-08 | 1.35E-04 |
| cg18875012 | 3  | 172165517 | GHSR     | 0.29  | 8.27E-08 | 1.36E-04 |
| cg16680547 | 1  | 14027567  | PRDM2    | 0.27  | 8.44E-08 | 1.37E-04 |
| cg19070088 | 4  | 190123606 |          | 0.32  | 8.48E-08 | 1.37E-04 |
| cg21250721 | 9  | 140056227 | GRIN1    | 0.38  | 8.70E-08 | 1.38E-04 |
| cg23683674 | 11 | 73020562  | ARHGEF17 | 0.33  | 8.77E-08 | 1.38E-04 |
| cg06386307 | 6  | 100895211 | SIM1     | 0.34  | 8.78E-08 | 1.38E-04 |
| cg26248075 | 6  | 100895481 | SIM1     | 0.37  | 8.81E-08 | 1.38E-04 |
| cg02970384 | 1  | 229567560 | ACTA1    | 0.34  | 8.85E-08 | 1.38E-04 |
| cg00248242 | 2  | 240867059 |          | -0.25 | 9.06E-08 | 1.41E-04 |
| cg24624901 | 7  | 19184273  |          | 0.37  | 9.13E-08 | 1.41E-04 |
| cg25399162 | 18 | 34824016  | BRUNOL4  | 0.28  | 9.16E-08 | 1.41E-04 |
| cg13240116 | 7  | 27147513  | HOXA3    | 0.25  | 9.25E-08 | 1.41E-04 |
| cg15435730 | 6  | 50680222  | TFAP2D   | 0.28  | 9.45E-08 | 1.43E-04 |
| cg02225599 | 7  | 27143252  | HOXA2    | 0.21  | 9.60E-08 | 1.44E-04 |
| cg27262041 | 11 | 19654032  | NAV2     | -0.25 | 9.62E-08 | 1.44E-04 |
| cg00525823 | 18 | 11148510  | FAM38B   | 0.30  | 9.89E-08 | 1.47E-04 |
| cg05677724 | 12 | 131125565 |          | -0.23 | 1.01E-07 | 1.50E-04 |
| cg11201177 | 11 | 2961805   |          | -0.23 | 1.04E-07 | 1.52E-04 |
| cg11229513 | 8  | 70984559  | PRDM14   | 0.36  | 1.04E-07 | 1.52E-04 |
| cg03883784 | 19 | 7680105   | KIAA1543 | -0.32 | 1.04E-07 | 1.52E-04 |
| cg00502190 | 1  | 156616560 | BCAN     | 0.25  | 1.05E-07 | 1.52E-04 |
| cg20054157 | 10 | 10837080  | SFTA1P   | -0.25 | 1.06E-07 | 1.54E-04 |
| cg09434500 | 19 | 42502897  | GRIK5    | 0.29  | 1.08E-07 | 1.56E-04 |
| cg13892750 | 9  | 136293722 | ADAMTS13 | 0.29  | 1.09E-07 | 1.56E-04 |
| cg22570213 | 15 | 91497863  | RCCD1    | 0.23  | 1.10E-07 | 1.57E-04 |
| cg19072291 | 7  | 65617362  | CRCP     | -0.24 | 1.11E-07 | 1.57E-04 |
| cg07546916 | 19 | 51231840  |          | 0.33  | 1.11E-07 | 1.57E-04 |
| cg22374057 | 18 | 11148682  | FAM38B   | 0.28  | 1.12E-07 | 1.57E-04 |
| cg20557801 | 15 | 68121177  | LBXCOR1  | 0.35  | 1.12E-07 | 1.57E-04 |
| cg06615380 | 1  | 1072902   |          | 0.27  | 1.13E-07 | 1.57E-04 |
| cg24104241 | 1  | 229567626 | ACTA1    | 0.38  | 1.13E-07 | 1.57E-04 |
| cg27087956 | 5  | 122430153 | PRDM6    | 0.29  | 1.13E-07 | 1.57E-04 |

|            |    |           |          |       |          |          |
|------------|----|-----------|----------|-------|----------|----------|
| cg03830329 | 6  | 100897081 | SIM1     | 0.32  | 1.16E-07 | 1.59E-04 |
| cg08061745 | 19 | 51231557  |          | 0.27  | 1.21E-07 | 1.66E-04 |
| cg09925572 | 12 | 51518419  | TFCP2    | -0.25 | 1.22E-07 | 1.66E-04 |
| cg21460606 | 6  | 32055402  | TNXB     | 0.38  | 1.23E-07 | 1.66E-04 |
| cg07625430 | 19 | 18680126  | C19orf50 | -0.21 | 1.23E-07 | 1.66E-04 |
| cg10477621 | 7  | 19184950  | FERD3L   | 0.34  | 1.23E-07 | 1.66E-04 |
| cg11141380 | 11 | 122852417 | BSX      | 0.21  | 1.25E-07 | 1.68E-04 |
| cg25394203 | 19 | 11784708  | ZNF833   | 0.27  | 1.25E-07 | 1.68E-04 |
| cg19535672 | 2  | 27530455  | UCN      | 0.34  | 1.26E-07 | 1.68E-04 |
| cg04041960 | 10 | 121301765 | RGS10    | 0.36  | 1.28E-07 | 1.70E-04 |
| cg04207084 | 7  | 157477846 | PTPRN2   | 0.33  | 1.31E-07 | 1.73E-04 |
| cg24880701 | 15 | 68121563  | LBXCOR1  | 0.34  | 1.33E-07 | 1.74E-04 |
| cg07188513 | 7  | 156807474 |          | 0.20  | 1.33E-07 | 1.74E-04 |
| cg19240213 | 7  | 27163095  | HOXA3    | 0.31  | 1.34E-07 | 1.74E-04 |
| cg20168412 | 3  | 13324132  |          | 0.33  | 1.35E-07 | 1.75E-04 |
| cg05380821 | 6  | 108491108 | NR2E1    | 0.33  | 1.36E-07 | 1.75E-04 |
| cg20842253 | 2  | 27529788  | TRIM54   | 0.36  | 1.36E-07 | 1.75E-04 |
| cg04778178 | 7  | 27162294  | HOXA3    | 0.33  | 1.37E-07 | 1.76E-04 |
| cg08212230 | 5  | 54455564  | CDC20B   | 0.34  | 1.39E-07 | 1.76E-04 |
| cg16932827 | 3  | 193988639 |          | -0.24 | 1.39E-07 | 1.76E-04 |
| cg20983112 | 11 | 75480246  | DGAT2    | 0.28  | 1.39E-07 | 1.76E-04 |
| cg14526718 | 2  | 176932840 |          | 0.34  | 1.40E-07 | 1.77E-04 |
| cg04681600 | 14 | 38725536  | CLEC14A  | 0.28  | 1.44E-07 | 1.80E-04 |
| cg10812186 | 6  | 32055146  | TNXB     | 0.37  | 1.44E-07 | 1.80E-04 |
| cg27138293 | 17 | 79503701  | FSCN2    | 0.32  | 1.44E-07 | 1.80E-04 |
| cg26690915 | 6  | 30421218  |          | 0.23  | 1.44E-07 | 1.80E-04 |
| cg04385765 | 7  | 5122887   |          | -0.33 | 1.46E-07 | 1.81E-04 |
| cg10567964 | 1  | 205312695 | KLHDC8A  | 0.28  | 1.47E-07 | 1.82E-04 |
| cg20952901 | 19 | 17403529  | ABHD8    | 0.37  | 1.49E-07 | 1.83E-04 |
| cg21652122 | 22 | 28837586  | TTC28    | -0.25 | 1.51E-07 | 1.84E-04 |
| cg23969554 | 1  | 2979311   | FLJ42875 | 0.29  | 1.52E-07 | 1.84E-04 |
| cg05769889 | 12 | 89744701  | DUSP6    | 0.37  | 1.52E-07 | 1.84E-04 |
| cg18222083 | 17 | 41364007  | TMEM106A | 0.39  | 1.57E-07 | 1.90E-04 |
| cg08786026 | 6  | 126068238 |          | 0.37  | 1.60E-07 | 1.92E-04 |
| cg23162310 | 5  | 172199255 | DUSP1    | 0.34  | 1.60E-07 | 1.92E-04 |
| cg00073384 | 1  | 248343651 | OR2M2    | -0.29 | 1.63E-07 | 1.94E-04 |
| cg16748008 | 7  | 27155002  | HOXA3    | 0.25  | 1.64E-07 | 1.94E-04 |
| cg14605874 | 6  | 100915395 |          | 0.34  | 1.68E-07 | 1.98E-04 |
| cg15697476 | 6  | 32055474  | TNXB     | 0.33  | 1.71E-07 | 1.98E-04 |
| cg20745684 | 7  | 29923339  | WIPF3    | 0.22  | 1.71E-07 | 1.98E-04 |
| cg14065115 | 6  | 100916959 |          | 0.33  | 1.72E-07 | 1.98E-04 |
| cg14530304 | 17 | 77777792  |          | 0.26  | 1.72E-07 | 1.98E-04 |
| cg04436469 | 10 | 134598496 | NKX6-2   | 0.32  | 1.73E-07 | 1.99E-04 |
| cg26834680 | 1  | 111814208 |          | 0.27  | 1.77E-07 | 2.01E-04 |
| cg12252135 | 17 | 79503877  | FSCN2    | 0.35  | 1.77E-07 | 2.01E-04 |
| cg23865240 | 7  | 27134109  | HOXA1    | 0.31  | 1.78E-07 | 2.02E-04 |
| cg15123573 | 5  | 176827082 |          | 0.29  | 1.79E-07 | 2.02E-04 |
| cg02090762 | 17 | 79503859  | FSCN2    | 0.38  | 1.83E-07 | 2.05E-04 |
| cg06008356 | 16 | 1233872   | CACNA1H  | 0.21  | 1.84E-07 | 2.06E-04 |
| cg03236802 | 6  | 32055316  | TNXB     | 0.31  | 1.84E-07 | 2.06E-04 |
| cg02358323 | 11 | 44541718  |          | -0.21 | 1.85E-07 | 2.06E-04 |
| cg14934253 | 6  | 108436768 |          | 0.31  | 1.86E-07 | 2.06E-04 |
| cg07707031 | 17 | 79504142  | FSCN2    | 0.21  | 1.90E-07 | 2.10E-04 |
| cg24055029 | 6  | 32055137  | TNXB     | 0.37  | 1.93E-07 | 2.12E-04 |
| cg02033258 | 5  | 131593261 | PDLIM4   | 0.39  | 1.95E-07 | 2.14E-04 |
| cg05509896 | 16 | 3063869   | CLDN9    | 0.20  | 1.97E-07 | 2.15E-04 |
| cg20287461 | 17 | 7339158   | TMEM102  | 0.33  | 1.97E-07 | 2.15E-04 |
| cg25527494 | 13 | 100641243 |          | 0.32  | 1.99E-07 | 2.16E-04 |
| cg13572145 | 2  | 80529621  | CTNNA2   | 0.30  | 2.01E-07 | 2.17E-04 |
| cg24824178 | 5  | 141263222 |          | 0.33  | 2.02E-07 | 2.17E-04 |
| cg25734913 | 5  | 172672390 |          | 0.33  | 2.03E-07 | 2.17E-04 |
| cg09557462 | 8  | 26721736  | ADRA1A   | 0.31  | 2.03E-07 | 2.17E-04 |
| cg07247190 | 10 | 102979058 |          | 0.23  | 2.03E-07 | 2.17E-04 |
| cg08195247 | 2  | 176933286 |          | 0.32  | 2.04E-07 | 2.17E-04 |
| cg04204526 | 1  | 2980937   | FLJ42875 | 0.22  | 2.04E-07 | 2.17E-04 |
| cg13527872 | 9  | 90114037  | DAPK1    | 0.27  | 2.11E-07 | 2.22E-04 |

|            |    |           |           |       |          |          |
|------------|----|-----------|-----------|-------|----------|----------|
| cg24593272 | 10 | 102977637 |           | 0.29  | 2.12E-07 | 2.22E-04 |
| cg26220673 | 1  | 221064700 |           | 0.31  | 2.12E-07 | 2.22E-04 |
| cg24008544 | 17 | 41363899  | TMEM106A  | 0.31  | 2.12E-07 | 2.22E-04 |
| cg27525446 | 1  | 17019810  | ESPNP     | 0.29  | 2.13E-07 | 2.22E-04 |
| cg26314966 | 17 | 79466160  |           | -0.26 | 2.14E-07 | 2.23E-04 |
| cg21771200 | 19 | 11784761  | ZNF833    | 0.31  | 2.17E-07 | 2.25E-04 |
| cg08928408 | 3  | 149454106 |           | -0.20 | 2.18E-07 | 2.26E-04 |
| cg22638593 | 5  | 131593259 | PDLIM4    | 0.35  | 2.21E-07 | 2.26E-04 |
| cg20165545 | 1  | 3166599   | PRDM16    | 0.24  | 2.21E-07 | 2.26E-04 |
| cg18782604 | 6  | 100895050 | SIM1      | 0.41  | 2.23E-07 | 2.26E-04 |
| cg20028470 | 2  | 27530829  | UCN       | 0.33  | 2.23E-07 | 2.26E-04 |
| cg06987672 | 1  | 181453051 | CACNA1E   | 0.29  | 2.23E-07 | 2.26E-04 |
| cg09517106 | 1  | 198904195 |           | 0.33  | 2.25E-07 | 2.26E-04 |
| cg07716052 | 11 | 32454748  | WT1       | 0.29  | 2.26E-07 | 2.26E-04 |
| cg06536868 | 2  | 27530884  | UCN       | 0.36  | 2.26E-07 | 2.26E-04 |
| cg07984365 | 16 | 739425    | WDR24     | -0.23 | 2.26E-07 | 2.26E-04 |
| cg19427338 | 2  | 42566455  |           | -0.28 | 2.27E-07 | 2.27E-04 |
| cg04268813 | 2  | 42566404  |           | -0.25 | 2.29E-07 | 2.28E-04 |
| cg08098964 | 19 | 7680443   | KIAA1543  | -0.32 | 2.38E-07 | 2.35E-04 |
| cg02076378 | 19 | 7677739   | KIAA1543  | -0.30 | 2.40E-07 | 2.37E-04 |
| cg00899400 | 7  | 27154537  | HOXA3     | 0.25  | 2.42E-07 | 2.38E-04 |
| cg19378036 | 17 | 36105364  | HNF1B     | 0.28  | 2.44E-07 | 2.39E-04 |
| cg17689799 | 2  | 27529540  | TRIM54    | 0.33  | 2.49E-07 | 2.44E-04 |
| cg18501555 | 4  | 111554966 | PITX2     | 0.33  | 2.54E-07 | 2.46E-04 |
| cg04902729 | 1  | 181452707 | CACNA1E   | 0.34  | 2.54E-07 | 2.46E-04 |
| cg06486618 | 19 | 524262    |           | -0.25 | 2.55E-07 | 2.46E-04 |
| cg06332173 | 17 | 77777734  |           | 0.31  | 2.56E-07 | 2.46E-04 |
| cg02963613 | 2  | 1425319   | TPO       | -0.25 | 2.58E-07 | 2.48E-04 |
| cg00448752 | 1  | 101775370 |           | 0.29  | 2.59E-07 | 2.48E-04 |
| cg20691205 | 13 | 36919674  | SPG20     | 0.35  | 2.65E-07 | 2.51E-04 |
| cg17326555 | 1  | 119535693 |           | 0.33  | 2.67E-07 | 2.52E-04 |
| cg06819445 | 5  | 172199278 | DUSP1     | 0.27  | 2.69E-07 | 2.52E-04 |
| cg15209566 | 19 | 11784774  | ZNF833    | 0.30  | 2.69E-07 | 2.52E-04 |
| cg02533423 | 7  | 27232150  |           | 0.29  | 2.73E-07 | 2.54E-04 |
| cg01610231 | 4  | 111555314 | PITX2     | 0.33  | 2.73E-07 | 2.54E-04 |
| cg19335437 | 2  | 177039801 |           | 0.22  | 2.79E-07 | 2.57E-04 |
| cg11805669 | 2  | 157178294 |           | 0.34  | 2.79E-07 | 2.57E-04 |
| cg02488129 | 16 | 3058364   |           | 0.22  | 2.88E-07 | 2.64E-04 |
| cg10636745 | 1  | 101775181 |           | 0.35  | 2.90E-07 | 2.64E-04 |
| cg15329277 | 6  | 42980035  | MEA1      | -0.21 | 2.90E-07 | 2.64E-04 |
| cg11152263 | 7  | 569642    |           | -0.27 | 2.92E-07 | 2.64E-04 |
| cg21382382 | 4  | 174452961 | NBLA00301 | 0.26  | 2.98E-07 | 2.68E-04 |
| cg24940138 | 17 | 41363741  | TMEM106A  | 0.34  | 2.99E-07 | 2.68E-04 |
| cg11310863 | 2  | 144303521 | ARHGAP15  | -0.24 | 2.99E-07 | 2.68E-04 |
| cg01499197 | 13 | 28544814  | CDX2      | 0.27  | 3.00E-07 | 2.68E-04 |
| cg01726775 | 12 | 7261710   | LOC283314 | 0.23  | 3.01E-07 | 2.68E-04 |
| cg10319053 | 7  | 27143370  | HOXA2     | 0.21  | 3.07E-07 | 2.72E-04 |
| cg05210501 | 7  | 27219344  | HOXA10    | 0.22  | 3.09E-07 | 2.73E-04 |
| cg06382559 | 10 | 102896640 | TLX1      | 0.32  | 3.11E-07 | 2.74E-04 |
| cg03538383 | 12 | 110399167 | GIT2      | -0.22 | 3.13E-07 | 2.74E-04 |
| cg26608693 | 1  | 14027581  | PRDM2     | 0.32  | 3.14E-07 | 2.74E-04 |
| cg23949782 | 14 | 79452439  | NRXN3     | -0.24 | 3.14E-07 | 2.74E-04 |
| cg13881637 | 11 | 64064727  | KCNK4     | 0.22  | 3.18E-07 | 2.77E-04 |
| cg07810884 | 19 | 16178099  | TPM4      | -0.27 | 3.26E-07 | 2.80E-04 |
| cg22834542 | 11 | 88288530  | GRM5      | -0.27 | 3.29E-07 | 2.81E-04 |
| cg19534021 | 19 | 16178091  | TPM4      | -0.25 | 3.29E-07 | 2.81E-04 |
| cg09996288 | 6  | 32055517  | TNXB      | 0.34  | 3.30E-07 | 2.81E-04 |
| cg21769619 | 11 | 32454768  | WT1       | 0.27  | 3.31E-07 | 2.81E-04 |
| cg03515663 | 7  | 157478510 | PTPRN2    | 0.26  | 3.36E-07 | 2.84E-04 |
| cg22537474 | 20 | 10198659  | SNAP25    | 0.23  | 3.37E-07 | 2.84E-04 |
| cg24562669 | 7  | 97807699  | LMTK2     | -0.31 | 3.38E-07 | 2.85E-04 |
| cg21468274 | 17 | 7339835   | TMEM102   | 0.27  | 3.39E-07 | 2.85E-04 |
| cg18185958 | 2  | 223176899 |           | 0.26  | 3.44E-07 | 2.88E-04 |
| cg26922007 | 11 | 5080452   | OR52E2    | -0.31 | 3.46E-07 | 2.88E-04 |
| cg19904265 | 1  | 3166712   | PRDM16    | 0.21  | 3.48E-07 | 2.88E-04 |
| cg14432910 | 15 | 68121931  | LBXCOR1   | 0.29  | 3.49E-07 | 2.88E-04 |

|            |    |           |           |       |          |          |
|------------|----|-----------|-----------|-------|----------|----------|
| cg00977978 | 7  | 139409421 | HIPK2     | -0.20 | 3.49E-07 | 2.88E-04 |
| cg13206191 | 2  | 189745054 |           | -0.23 | 3.49E-07 | 2.88E-04 |
| cg16105870 | 2  | 131451075 |           | 0.21  | 3.51E-07 | 2.89E-04 |
| cg11856810 | 2  | 155554961 | KCNJ3     | 0.29  | 3.55E-07 | 2.91E-04 |
| cg27557378 | 16 | 2286786   | DNASE1L2  | 0.33  | 3.55E-07 | 2.91E-04 |
| cg04528477 | 2  | 176932458 |           | 0.30  | 3.58E-07 | 2.92E-04 |
| cg06354193 | 1  | 3183072   | PRDM16    | 0.23  | 3.59E-07 | 2.92E-04 |
| cg19909239 | 4  | 111555503 | PITX2     | 0.27  | 3.60E-07 | 2.92E-04 |
| cg19258665 | 7  | 157482508 | PTPRN2    | 0.22  | 3.60E-07 | 2.92E-04 |
| cg14355911 | 17 | 59473456  |           | 0.28  | 3.64E-07 | 2.94E-04 |
| cg25108022 | 5  | 172199313 | DUSP1     | 0.33  | 3.67E-07 | 2.94E-04 |
| cg04370314 | 13 | 100643312 |           | 0.34  | 3.67E-07 | 2.94E-04 |
| cg17924415 | 17 | 77777053  |           | 0.27  | 3.72E-07 | 2.97E-04 |
| cg03049782 | 17 | 41363891  | TMEM106A  | 0.28  | 3.73E-07 | 2.97E-04 |
| cg16288089 | 7  | 97361408  | TAC1      | 0.36  | 3.73E-07 | 2.97E-04 |
| cg19807376 | 6  | 32055447  | TNXB      | 0.33  | 3.79E-07 | 2.99E-04 |
| cg11025705 | 8  | 145697880 | KIFC2     | 0.25  | 3.79E-07 | 2.99E-04 |
| cg24912415 | 20 | 33585435  | MYH7B     | 0.23  | 3.80E-07 | 2.99E-04 |
| cg19304088 | 4  | 111547790 | PITX2     | 0.25  | 3.81E-07 | 2.99E-04 |
| cg12434944 | 7  | 48031559  | SUNC1     | 0.27  | 3.81E-07 | 2.99E-04 |
| cg11694262 | 13 | 100644657 |           | 0.36  | 3.82E-07 | 2.99E-04 |
| cg13662644 | 19 | 7677237   | KIAA1543  | -0.29 | 3.84E-07 | 2.99E-04 |
| cg18046394 | 7  | 29924165  | WIPF3     | 0.26  | 3.86E-07 | 2.99E-04 |
| cg20471413 | 6  | 32055135  | TNXB      | 0.34  | 3.86E-07 | 2.99E-04 |
| cg24788897 | 2  | 164965721 |           | -0.28 | 3.88E-07 | 2.99E-04 |
| cg20406482 | 17 | 40333521  | KCNH4     | 0.24  | 3.92E-07 | 3.01E-04 |
| cg08589077 | 17 | 58217038  |           | 0.32  | 3.93E-07 | 3.01E-04 |
| cg24817154 | 6  | 27858279  | HIST1H3J  | 0.29  | 3.93E-07 | 3.01E-04 |
| cg19617161 | 7  | 13788841  |           | 0.24  | 3.95E-07 | 3.01E-04 |
| cg26327092 | 12 | 130469463 |           | -0.26 | 3.96E-07 | 3.01E-04 |
| cg03222323 | 17 | 59534903  | TBX4      | 0.24  | 3.96E-07 | 3.01E-04 |
| cg21723559 | 20 | 44048174  | PIGT      | -0.22 | 3.98E-07 | 3.02E-04 |
| cg04482110 | 17 | 41364121  | TMEM106A  | 0.30  | 4.01E-07 | 3.02E-04 |
| cg00542880 | 9  | 97765043  | C9orf3    | -0.30 | 4.01E-07 | 3.02E-04 |
| cg08118159 | 19 | 41055208  | SPTBN4    | 0.35  | 4.03E-07 | 3.03E-04 |
| cg14199723 | 8  | 145051795 | PLEC1     | 0.28  | 4.04E-07 | 3.03E-04 |
| cg10445449 | 13 | 100644420 |           | 0.37  | 4.08E-07 | 3.04E-04 |
| cg09227150 | 10 | 102475578 |           | 0.26  | 4.10E-07 | 3.04E-04 |
| cg15498134 | 1  | 25246854  | RUNX3     | -0.23 | 4.10E-07 | 3.04E-04 |
| cg08308801 | 10 | 119867973 | CASC2     | -0.29 | 4.11E-07 | 3.05E-04 |
| cg26297005 | 7  | 27162090  | HOXA3     | 0.31  | 4.17E-07 | 3.08E-04 |
| cg05452406 | 6  | 10881891  | GCM2      | 0.34  | 4.22E-07 | 3.10E-04 |
| cg00445443 | 7  | 27143478  | HOXA2     | 0.24  | 4.25E-07 | 3.10E-04 |
| cg00410600 | 8  | 145555942 | SCRT1     | 0.27  | 4.25E-07 | 3.10E-04 |
| cg04433035 | 17 | 36105064  | HNF1B     | 0.20  | 4.25E-07 | 3.10E-04 |
| cg17139210 | 1  | 115213243 | DENND2C   | 0.30  | 4.27E-07 | 3.11E-04 |
| cg13906069 | 1  | 115213259 | DENND2C   | 0.30  | 4.31E-07 | 3.13E-04 |
| cg23745839 | 11 | 20627025  | SLC6A5    | 0.27  | 4.33E-07 | 3.14E-04 |
| cg05651283 | 1  | 53098912  | FAM159A   | 0.30  | 4.34E-07 | 3.14E-04 |
| cg04556550 | 7  | 72982668  |           | -0.23 | 4.36E-07 | 3.15E-04 |
| cg21504064 | 17 | 41363502  | NBR1      | 0.24  | 4.38E-07 | 3.16E-04 |
| cg12659883 | 1  | 119543057 |           | 0.34  | 4.44E-07 | 3.19E-04 |
| cg19817912 | 7  | 27162768  | HOXA3     | 0.26  | 4.46E-07 | 3.20E-04 |
| cg08488945 | 3  | 181422202 | SOX2OT    | 0.27  | 4.61E-07 | 3.28E-04 |
| cg19095920 | 4  | 174458819 | NBLA00301 | 0.28  | 4.62E-07 | 3.28E-04 |
| cg00642460 | 5  | 176827697 | PFN3      | 0.33  | 4.63E-07 | 3.28E-04 |
| cg23536473 | 7  | 19184555  | FERD3L    | 0.33  | 4.63E-07 | 3.28E-04 |
| cg26922678 | 6  | 30420981  |           | 0.29  | 4.64E-07 | 3.28E-04 |
| cg03171924 | 1  | 25258332  | RUNX3     | 0.28  | 4.68E-07 | 3.30E-04 |
| cg10599985 | 22 | 27068733  | MIAT      | 0.23  | 4.69E-07 | 3.30E-04 |
| cg10558887 | 13 | 36919409  | SPG20     | 0.32  | 4.75E-07 | 3.32E-04 |
| cg19645221 | 14 | 38058284  |           | 0.28  | 4.75E-07 | 3.32E-04 |
| cg02996142 | 1  | 53168724  |           | 0.29  | 4.77E-07 | 3.32E-04 |
| cg00997079 | 2  | 80529990  | CTNNA2    | 0.29  | 4.78E-07 | 3.32E-04 |
| cg05581415 | 16 | 2286492   | DNASE1L2  | 0.28  | 4.80E-07 | 3.32E-04 |
| cg03294619 | 5  | 172661803 | NKX2-5    | 0.30  | 4.83E-07 | 3.33E-04 |



|            |    |           |           |       |          |          |
|------------|----|-----------|-----------|-------|----------|----------|
| cg13649103 | 9  | 137734338 | COL5A1    | -0.31 | 4.87E-07 | 3.34E-04 |
| cg06327727 | 3  | 62354546  |           | 0.34  | 4.88E-07 | 3.34E-04 |
| cg10838664 | 22 | 27068761  | MIAT      | 0.30  | 4.89E-07 | 3.34E-04 |
| cg04161236 | 11 | 5263432   | HBBP1     | -0.28 | 4.89E-07 | 3.34E-04 |
| cg18629151 | 4  | 13539581  |           | 0.24  | 4.90E-07 | 3.34E-04 |
| cg21378238 | 1  | 181452618 | CACNA1E   | 0.24  | 4.92E-07 | 3.34E-04 |
| cg17484993 | 2  | 164965724 |           | -0.28 | 4.93E-07 | 3.34E-04 |
| cg00796424 | 12 | 54365966  | HOXC11    | 0.28  | 4.93E-07 | 3.34E-04 |
| cg05152300 | 16 | 17458534  | XYLT1     | 0.25  | 4.94E-07 | 3.34E-04 |
| cg20523861 | 13 | 70682324  | KLHL1     | 0.33  | 4.94E-07 | 3.34E-04 |
| cg16406967 | 7  | 27155036  | HOXA3     | 0.30  | 4.97E-07 | 3.36E-04 |
| cg01558916 | 19 | 11804727  |           | 0.20  | 4.99E-07 | 3.36E-04 |
| cg10703786 | 7  | 5123074   |           | -0.20 | 5.06E-07 | 3.40E-04 |
| cg19165854 | 15 | 79725126  | KIAA1024  | 0.31  | 5.09E-07 | 3.41E-04 |
| cg02740950 | 6  | 32055534  | TNXB      | 0.30  | 5.10E-07 | 3.41E-04 |
| cg05482942 | 10 | 102899285 |           | 0.35  | 5.11E-07 | 3.42E-04 |
| cg03499808 | 11 | 73020459  | ARHGEF17  | 0.35  | 5.13E-07 | 3.42E-04 |
| cg27430293 | 16 | 89069935  |           | -0.23 | 5.24E-07 | 3.47E-04 |
| cg17243289 | 18 | 45458021  | SMAD2     | 0.21  | 5.27E-07 | 3.47E-04 |
| cg26510017 | 12 | 39299546  | CPNE8     | 0.28  | 5.31E-07 | 3.48E-04 |
| cg14363981 | 13 | 107186561 | EFNB2     | 0.28  | 5.34E-07 | 3.48E-04 |
| cg25529393 | 6  | 27858380  | HIST1H3J  | 0.35  | 5.37E-07 | 3.49E-04 |
| cg06166490 | 7  | 27143334  | HOXA2     | 0.24  | 5.37E-07 | 3.49E-04 |
| cg02227188 | 12 | 54396354  | HOXC9     | 0.32  | 5.38E-07 | 3.49E-04 |
| cg23674469 | 1  | 101775142 |           | 0.30  | 5.47E-07 | 3.53E-04 |
| cg01776188 | 5  | 172664082 |           | 0.29  | 5.49E-07 | 3.53E-04 |
| cg13851466 | 1  | 38219973  | EPHA10    | 0.26  | 5.53E-07 | 3.55E-04 |
| cg24006721 | 1  | 25258225  | RUNX3     | 0.28  | 5.57E-07 | 3.56E-04 |
| cg03546977 | 5  | 78985489  | CMYA5     | 0.30  | 5.62E-07 | 3.58E-04 |
| cg25287482 | 1  | 23884847  | ID3       | 0.24  | 5.74E-07 | 3.63E-04 |
| cg20866075 | 17 | 77777010  |           | 0.28  | 5.75E-07 | 3.63E-04 |
| cg00087368 | 6  | 100896392 | SIM1      | 0.27  | 5.76E-07 | 3.63E-04 |
| cg22618215 | 3  | 62354489  |           | 0.22  | 5.76E-07 | 3.63E-04 |
| cg15215612 | 19 | 51231736  |           | 0.36  | 5.77E-07 | 3.63E-04 |
| cg26404422 | 11 | 128367010 | ETS1      | -0.22 | 5.80E-07 | 3.63E-04 |
| cg08484671 | 19 | 41055297  | SPTBN4    | 0.30  | 5.80E-07 | 3.63E-04 |
| cg14789272 | 5  | 54456056  | CDC20B    | 0.22  | 5.81E-07 | 3.63E-04 |
| cg01144053 | 2  | 7571361   |           | 0.30  | 5.82E-07 | 3.63E-04 |
| cg19432993 | 7  | 27143287  | HOXA2     | 0.22  | 5.83E-07 | 3.63E-04 |
| cg21406271 | 1  | 25258082  | RUNX3     | 0.30  | 5.84E-07 | 3.63E-04 |
| cg00326958 | 10 | 43892075  | HNRNPF    | 0.31  | 5.85E-07 | 3.63E-04 |
| cg01404317 | 13 | 36919819  | SPG20     | 0.34  | 5.88E-07 | 3.65E-04 |
| cg24100168 | 11 | 5667836   | TRIM78P   | -0.28 | 5.93E-07 | 3.65E-04 |
| cg24035245 | 1  | 119535928 |           | 0.34  | 5.93E-07 | 3.65E-04 |
| cg00184452 | 1  | 50887477  | DMRTA2    | 0.21  | 5.93E-07 | 3.65E-04 |
| cg04771100 | 8  | 38832335  | HTRA4     | 0.31  | 5.94E-07 | 3.65E-04 |
| cg09845293 | 10 | 7567980   |           | -0.30 | 6.05E-07 | 3.70E-04 |
| cg06724305 | 1  | 50887944  | DMRTA2    | 0.22  | 6.05E-07 | 3.70E-04 |
| cg14801038 | 6  | 134214307 | TCF21     | 0.22  | 6.06E-07 | 3.70E-04 |
| cg06338710 | 1  | 92946187  | GFI1      | 0.28  | 6.07E-07 | 3.70E-04 |
| cg17965019 | 6  | 27858545  | HIST1H3J  | 0.37  | 6.07E-07 | 3.70E-04 |
| cg18680977 | 7  | 27155039  | HOXA3     | 0.30  | 6.10E-07 | 3.71E-04 |
| cg00345344 | 16 | 88459714  |           | -0.22 | 6.18E-07 | 3.74E-04 |
| cg07135237 | 10 | 21808126  | C10orf140 | 0.23  | 6.24E-07 | 3.77E-04 |
| cg18178010 | 6  | 32055629  | TNXB      | 0.30  | 6.29E-07 | 3.78E-04 |
| cg15569451 | 20 | 44041324  |           | -0.25 | 6.35E-07 | 3.80E-04 |
| cg07847863 | 13 | 53419963  | PCDH8     | 0.33  | 6.41E-07 | 3.82E-04 |
| cg17744295 | 19 | 16178097  | TPM4      | -0.25 | 6.43E-07 | 3.82E-04 |
| cg00014104 | 22 | 22220367  | MAPK1     | 0.27  | 6.43E-07 | 3.82E-04 |
| cg13655674 | 1  | 119522386 | TBX15     | 0.34  | 6.46E-07 | 3.83E-04 |
| cg27160241 | 19 | 10225927  | EIF3G     | -0.22 | 6.52E-07 | 3.85E-04 |
| cg26590664 | 19 | 11784731  | ZNF833    | 0.28  | 6.54E-07 | 3.85E-04 |
| cg04027736 | 7  | 27143403  | HOXA2     | 0.22  | 6.55E-07 | 3.85E-04 |
| cg27052403 | 11 | 113185154 | TTC12     | 0.31  | 6.55E-07 | 3.85E-04 |
| cg13552867 | 1  | 160053689 | KCNJ9     | 0.30  | 6.61E-07 | 3.88E-04 |
| cg18771357 | 13 | 107186870 | EFNB2     | 0.35  | 6.63E-07 | 3.89E-04 |

|            |    |           |           |       |          |          |
|------------|----|-----------|-----------|-------|----------|----------|
| cg06324373 | 10 | 99734805  | CRTAC1    | 0.30  | 6.68E-07 | 3.91E-04 |
| cg13241663 | 17 | 33125534  |           | -0.24 | 6.70E-07 | 3.91E-04 |
| cg23483886 | 5  | 1476274   | LPCAT1    | 0.23  | 6.70E-07 | 3.91E-04 |
| cg22305258 | 17 | 4643367   | CXCL16    | 0.29  | 6.77E-07 | 3.93E-04 |
| cg16264616 | 12 | 54390824  |           | 0.21  | 6.79E-07 | 3.93E-04 |
| cg15575683 | 1  | 156358612 |           | 0.24  | 6.82E-07 | 3.93E-04 |
| cg02305687 | 5  | 33937182  | RXFP3     | 0.27  | 6.82E-07 | 3.93E-04 |
| cg14022022 | 9  | 140055728 | GRIN1     | 0.30  | 6.83E-07 | 3.93E-04 |
| cg17576736 | 13 | 112908450 |           | -0.21 | 6.86E-07 | 3.93E-04 |
| cg17760405 | 6  | 100915191 |           | 0.36  | 6.87E-07 | 3.93E-04 |
| cg05581451 | 4  | 111553999 | PITX2     | 0.22  | 6.87E-07 | 3.93E-04 |
| cg19521279 | 7  | 27144595  |           | 0.22  | 6.87E-07 | 3.93E-04 |
| cg15907392 | 12 | 34494852  |           | -0.29 | 6.89E-07 | 3.93E-04 |
| cg01250490 | 1  | 12251718  | TNFRSF1B  | -0.24 | 6.90E-07 | 3.93E-04 |
| cg02567289 | 1  | 247805255 |           | -0.32 | 6.93E-07 | 3.94E-04 |
| cg23547759 | 19 | 15237807  | ILVBL     | -0.24 | 6.95E-07 | 3.94E-04 |
| cg18921954 | 5  | 33938909  |           | 0.28  | 6.97E-07 | 3.94E-04 |
| cg01053087 | 8  | 637909    | ERICH1    | 0.29  | 7.09E-07 | 3.98E-04 |
| cg04044664 | 5  | 132150117 | ANKRD43   | 0.27  | 7.15E-07 | 4.01E-04 |
| cg07269374 | 12 | 66176707  | RPSAP52   | -0.29 | 7.16E-07 | 4.01E-04 |
| cg17346246 | 12 | 123214864 | GPR81     | -0.30 | 7.20E-07 | 4.01E-04 |
| cg07872868 | 2  | 27530153  | TRIM54    | 0.33  | 7.22E-07 | 4.01E-04 |
| cg15509361 | 7  | 19183325  |           | 0.21  | 7.29E-07 | 4.04E-04 |
| cg06071058 | 9  | 96716091  | BARX1     | 0.24  | 7.30E-07 | 4.04E-04 |
| cg15832180 | 19 | 7032924   | MBD3L5    | -0.22 | 7.31E-07 | 4.04E-04 |
| cg13870990 | 18 | 28682408  | DSC2      | 0.23  | 7.32E-07 | 4.04E-04 |
| cg27183679 | 4  | 111562545 |           | 0.29  | 7.33E-07 | 4.04E-04 |
| cg04159903 | 5  | 42949799  |           | 0.30  | 7.38E-07 | 4.05E-04 |
| cg00980978 | 20 | 44098724  | WFDC2     | 0.27  | 7.40E-07 | 4.05E-04 |
| cg01302656 | 14 | 29254853  | C14orf23  | 0.28  | 7.40E-07 | 4.05E-04 |
| cg05459190 | 10 | 134110326 | STK32C    | -0.22 | 7.41E-07 | 4.05E-04 |
| cg13603508 | 12 | 39299326  | CPNE8     | 0.36  | 7.42E-07 | 4.05E-04 |
| cg09403249 | 12 | 45444203  | DBX2      | 0.31  | 7.43E-07 | 4.05E-04 |
| cg15929573 | 12 | 49658188  | TUBA1C    | 0.29  | 7.44E-07 | 4.05E-04 |
| cg04351734 | 7  | 27155173  | HOXA3     | 0.21  | 7.45E-07 | 4.05E-04 |
| cg05974274 | 4  | 81123369  | PRDM8     | 0.34  | 7.47E-07 | 4.05E-04 |
| cg21239997 | 2  | 24398519  | C2orf84   | -0.23 | 7.51E-07 | 4.07E-04 |
| cg05301866 | 2  | 162279964 | TBR1      | 0.30  | 7.55E-07 | 4.07E-04 |
| cg01217984 | 7  | 27143235  | HOXA2     | 0.20  | 7.55E-07 | 4.07E-04 |
| cg18008019 | 13 | 100641646 |           | 0.33  | 7.62E-07 | 4.11E-04 |
| cg24463471 | 1  | 25257978  | RUNX3     | 0.31  | 7.63E-07 | 4.11E-04 |
| cg12053155 | 13 | 107186476 | EFNB2     | 0.33  | 7.65E-07 | 4.11E-04 |
| cg19537645 | 5  | 172199418 | DUSP1     | 0.27  | 7.85E-07 | 4.18E-04 |
| cg17001689 | 6  | 32055525  | TNXB      | 0.29  | 7.85E-07 | 4.18E-04 |
| cg00369438 | 19 | 41076542  | SPTBN4    | 0.35  | 7.86E-07 | 4.18E-04 |
| cg22614142 | 8  | 145698232 | KIFC2     | 0.34  | 7.87E-07 | 4.18E-04 |
| cg13436155 | 13 | 100644217 |           | 0.33  | 7.87E-07 | 4.18E-04 |
| cg00241002 | 10 | 26931912  | LOC731789 | -0.27 | 7.87E-07 | 4.18E-04 |
| cg13696609 | 9  | 100617710 | FOXE1     | 0.28  | 7.93E-07 | 4.20E-04 |
| cg02534850 | 12 | 66228466  | HMGA2     | -0.28 | 7.94E-07 | 4.20E-04 |
| cg21211480 | 17 | 41363774  | TMEM106A  | 0.32  | 7.98E-07 | 4.21E-04 |
| cg27111463 | 2  | 88751405  | FOXI3     | 0.30  | 8.07E-07 | 4.24E-04 |
| cg15545772 | 1  | 179561111 | TDRD5     | 0.35  | 8.09E-07 | 4.25E-04 |
| cg00964997 | 4  | 13531195  |           | 0.30  | 8.14E-07 | 4.26E-04 |
| cg22802994 | 19 | 7680089   | KIAA1543  | -0.25 | 8.18E-07 | 4.27E-04 |
| cg17972352 | 10 | 45939668  | ALOX5     | -0.20 | 8.29E-07 | 4.32E-04 |
| cg24944820 | 11 | 61723377  | BEST1     | 0.24  | 8.44E-07 | 4.35E-04 |
| cg16817826 | 3  | 62356323  | FEZF2     | 0.33  | 8.44E-07 | 4.35E-04 |
| cg21041775 | 12 | 54425418  | HOXC4     | 0.30  | 8.45E-07 | 4.35E-04 |
| cg01175020 | 10 | 102896475 | TLX1      | 0.31  | 8.57E-07 | 4.39E-04 |
| cg12979234 | 7  | 44083518  | DBNL      | -0.29 | 8.58E-07 | 4.39E-04 |
| cg18759693 | 22 | 27068748  | MIAT      | 0.30  | 8.65E-07 | 4.39E-04 |
| cg05826677 | 7  | 48031468  | SUNC1     | 0.25  | 8.65E-07 | 4.39E-04 |
| cg06942701 | 2  | 162280009 | TBR1      | 0.29  | 8.66E-07 | 4.39E-04 |
| cg15633390 | 4  | 99851211  | EIF4E     | -0.26 | 8.67E-07 | 4.39E-04 |
| cg20572816 | 10 | 102896102 | TLX1      | 0.27  | 8.69E-07 | 4.39E-04 |

|            |    |           |         |       |          |          |
|------------|----|-----------|---------|-------|----------|----------|
| cg00447052 | 8  | 145556707 | SCRT1   | 0.32  | 8.70E-07 | 4.39E-04 |
| cg11889730 | 10 | 37967356  |         | 0.27  | 8.72E-07 | 4.39E-04 |
| cg23778943 | 6  | 30421189  |         | 0.24  | 8.72E-07 | 4.39E-04 |
| cg06625816 | 15 | 48484302  | CTXN2   | 0.24  | 8.73E-07 | 4.39E-04 |
| cg06657243 | 22 | 27068716  | MIAT    | 0.24  | 8.75E-07 | 4.40E-04 |
| cg10678266 | 7  | 24614348  | MPP6    | 0.25  | 8.76E-07 | 4.40E-04 |
| cg23856293 | 20 | 62795341  | MYT1    | -0.25 | 8.77E-07 | 4.40E-04 |
| cg16024836 | 17 | 58216988  |         | 0.31  | 9.02E-07 | 4.50E-04 |
| cg01027532 | 7  | 27155974  | HOXA3   | 0.22  | 9.05E-07 | 4.51E-04 |
| cg18177414 | 7  | 149389929 |         | 0.32  | 9.06E-07 | 4.51E-04 |
| cg21977377 | 20 | 21492823  | NKX2-2  | 0.31  | 9.09E-07 | 4.52E-04 |
| cg09877947 | 5  | 131593287 | PDLIM4  | 0.34  | 9.13E-07 | 4.53E-04 |
| cg05260466 | 3  | 27756661  |         | 0.34  | 9.18E-07 | 4.54E-04 |
| cg05809668 | 7  | 35301188  |         | 0.37  | 9.19E-07 | 4.54E-04 |
| cg23217386 | 11 | 5653254   | TRIM34  | -0.33 | 9.20E-07 | 4.54E-04 |
| cg23879118 | 11 | 67414373  | ACY3    | -0.23 | 9.30E-07 | 4.58E-04 |
| cg15556886 | 4  | 81123306  | PRDM8   | 0.31  | 9.31E-07 | 4.58E-04 |
| cg21064916 | 11 | 44340839  |         | 0.28  | 9.34E-07 | 4.59E-04 |
| cg14091896 | 9  | 137667343 | COL5A1  | -0.25 | 9.37E-07 | 4.59E-04 |
| cg10837843 | 5  | 172199244 | DUSP1   | 0.27  | 9.39E-07 | 4.60E-04 |
| cg07018580 | 11 | 59480501  | OR10V1  | -0.27 | 9.43E-07 | 4.61E-04 |
| cg16467262 | 5  | 140705984 |         | 0.27  | 9.51E-07 | 4.63E-04 |
| cg15982700 | 7  | 27154911  | HOXA3   | 0.27  | 9.52E-07 | 4.63E-04 |
| cg27282530 | 3  | 125898680 | ALDH1L1 | 0.27  | 9.58E-07 | 4.65E-04 |
| cg17861161 | 1  | 3184434   | PRDM16  | 0.20  | 9.62E-07 | 4.66E-04 |
| cg22489321 | 13 | 100643388 |         | 0.34  | 9.68E-07 | 4.68E-04 |
| cg25940392 | 21 | 38064699  |         | 0.32  | 9.72E-07 | 4.70E-04 |
| cg13954667 | 10 | 88295472  |         | 0.23  | 9.77E-07 | 4.71E-04 |
| cg24182470 | 12 | 39299844  | CPNE8   | 0.36  | 9.77E-07 | 4.71E-04 |
| cg22694818 | 1  | 75595970  | LHX8    | 0.32  | 9.81E-07 | 4.72E-04 |
| cg03966514 | 13 | 36919738  | SPG20   | 0.31  | 9.85E-07 | 4.73E-04 |
| cg24361385 | 7  | 27164709  | HOXA3   | 0.26  | 9.90E-07 | 4.73E-04 |
| cg27307257 | 10 | 102978358 |         | 0.25  | 9.91E-07 | 4.73E-04 |
| cg22995692 | 5  | 141263164 |         | 0.35  | 9.91E-07 | 4.73E-04 |
| cg24640735 | 12 | 10065986  | CLEC2A  | -0.28 | 9.97E-07 | 4.75E-04 |
| cg26680132 | 6  | 50685247  | TFAP2D  | 0.30  | 1.00E-06 | 4.76E-04 |
| cg12824139 | 13 | 99405265  | SLC15A1 | -0.21 | 1.00E-06 | 4.76E-04 |
| cg26811372 | 5  | 140772182 | PCDHGA4 | 0.23  | 1.01E-06 | 4.77E-04 |
| cg06667761 | 4  | 134073627 | PCDH10  | 0.31  | 1.01E-06 | 4.77E-04 |
| cg23646360 | 6  | 10886130  | SYCP2L  | 0.20  | 1.01E-06 | 4.77E-04 |
| cg16700000 | 3  | 27756844  |         | 0.35  | 1.01E-06 | 4.77E-04 |
| cg23279355 | 5  | 78985592  | CMYA5   | 0.34  | 1.01E-06 | 4.77E-04 |
| cg19526568 | 13 | 100643087 |         | 0.28  | 1.01E-06 | 4.77E-04 |
| cg09415272 | 2  | 88751158  | FOXI3   | 0.23  | 1.02E-06 | 4.77E-04 |
| cg21784036 | 12 | 39299726  | CPNE8   | 0.35  | 1.02E-06 | 4.77E-04 |
| cg20072442 | 2  | 80530255  | CTNNA2  | 0.36  | 1.02E-06 | 4.77E-04 |
| cg22845159 | 4  | 26858873  |         | 0.22  | 1.02E-06 | 4.77E-04 |
| cg11729679 | 2  | 111877065 | BCL2L11 | 0.30  | 1.03E-06 | 4.77E-04 |
| cg01454215 | 2  | 27530363  | UCN     | 0.33  | 1.03E-06 | 4.77E-04 |
| cg07537370 | 2  | 27531124  | UCN     | 0.23  | 1.03E-06 | 4.77E-04 |
| cg09643136 | 2  | 223176683 |         | 0.29  | 1.03E-06 | 4.77E-04 |
| cg26479533 | 7  | 75864324  | SRRM3   | 0.22  | 1.03E-06 | 4.78E-04 |
| cg12277666 | 1  | 179560870 | TDRD5   | 0.34  | 1.04E-06 | 4.78E-04 |
| cg23663774 | 4  | 111555440 | PITX2   | 0.36  | 1.05E-06 | 4.79E-04 |
| cg22471075 | 22 | 49765229  |         | -0.32 | 1.05E-06 | 4.79E-04 |
| cg08671647 | 4  | 30724564  | PCDH7   | 0.28  | 1.05E-06 | 4.79E-04 |
| cg01963134 | 12 | 39299364  | CPNE8   | 0.37  | 1.05E-06 | 4.79E-04 |
| cg08461339 | 2  | 241459227 | ANKMY1  | 0.23  | 1.05E-06 | 4.79E-04 |
| cg05431842 | 4  | 30724915  | PCDH7   | 0.27  | 1.05E-06 | 4.79E-04 |
| cg02426178 | 19 | 10747142  | SLC44A2 | -0.22 | 1.06E-06 | 4.79E-04 |
| cg19887502 | 2  | 219761853 |         | 0.25  | 1.06E-06 | 4.80E-04 |
| cg01959730 | 1  | 119548825 |         | 0.33  | 1.06E-06 | 4.80E-04 |
| cg08832603 | 7  | 96652481  | DLX5    | 0.29  | 1.06E-06 | 4.81E-04 |
| cg12438547 | 13 | 100642971 |         | 0.30  | 1.06E-06 | 4.81E-04 |
| cg10233654 | 12 | 89744621  | DUSP6   | 0.28  | 1.07E-06 | 4.81E-04 |
| cg04568492 | 1  | 229568252 | ACTA1   | 0.36  | 1.08E-06 | 4.82E-04 |

|            |    |           |           |       |          |          |
|------------|----|-----------|-----------|-------|----------|----------|
| cg18888655 | 19 | 17403176  | ABHD8     | 0.31  | 1.08E-06 | 4.82E-04 |
| cg05609536 | 19 | 41019285  | SPTBN4    | 0.20  | 1.08E-06 | 4.82E-04 |
| cg15575671 | 19 | 15236792  | ILVBL     | 0.29  | 1.08E-06 | 4.82E-04 |
| cg09484032 | 12 | 54329854  |           | 0.25  | 1.09E-06 | 4.84E-04 |
| cg05409218 | 3  | 27756851  |           | 0.35  | 1.09E-06 | 4.84E-04 |
| cg05127217 | 11 | 113185802 | TTC12     | 0.28  | 1.09E-06 | 4.86E-04 |
| cg18649133 | 5  | 93410528  | FAM172A   | -0.26 | 1.09E-06 | 4.86E-04 |
| cg26398921 | 1  | 221065480 |           | 0.29  | 1.09E-06 | 4.86E-04 |
| cg27068490 | 11 | 113185166 | TTC12     | 0.32  | 1.09E-06 | 4.86E-04 |
| cg22881652 | 4  | 13532951  |           | 0.29  | 1.10E-06 | 4.88E-04 |
| cg21230493 | 8  | 26722496  | ADRA1A    | 0.29  | 1.10E-06 | 4.89E-04 |
| cg15054725 | 2  | 223176606 |           | 0.31  | 1.11E-06 | 4.90E-04 |
| cg02721902 | 17 | 46825371  |           | 0.25  | 1.11E-06 | 4.90E-04 |
| cg19547319 | 10 | 102987993 | LBX1      | 0.26  | 1.12E-06 | 4.92E-04 |
| cg02170386 | 14 | 70316972  |           | 0.26  | 1.12E-06 | 4.92E-04 |
| cg12287976 | 11 | 5728046   | TRIM22    | -0.25 | 1.14E-06 | 4.98E-04 |
| cg02576468 | 19 | 41074006  | SPTBN4    | 0.34  | 1.15E-06 | 4.98E-04 |
| cg10353539 | 11 | 113185349 | TTC12     | 0.29  | 1.15E-06 | 4.98E-04 |
| cg16686158 | 22 | 30476098  | HORMAD2   | 0.31  | 1.15E-06 | 4.98E-04 |
| cg19385331 | 13 | 100641867 |           | 0.34  | 1.15E-06 | 4.98E-04 |
| cg11438310 | 5  | 78985434  | CMYA5     | 0.28  | 1.15E-06 | 4.98E-04 |
| cg19904425 | 14 | 94984530  | SERPINA12 | -0.28 | 1.16E-06 | 4.98E-04 |
| cg19640526 | 15 | 70233758  |           | 0.23  | 1.16E-06 | 4.98E-04 |
| cg11279444 | 1  | 53099053  | FAM159A   | 0.30  | 1.16E-06 | 4.98E-04 |
| cg00772407 | 12 | 89744471  | DUSP6     | 0.29  | 1.16E-06 | 4.98E-04 |
| cg17786697 | 5  | 122430509 | PRDM6     | 0.24  | 1.16E-06 | 4.98E-04 |
| cg11395799 | 1  | 115213248 | DENND2C   | 0.26  | 1.16E-06 | 4.98E-04 |
| cg21121336 | 12 | 12849068  | GPR19     | 0.28  | 1.17E-06 | 4.99E-04 |
| cg19605773 | 16 | 1435582   |           | -0.25 | 1.17E-06 | 5.00E-04 |
| cg17508941 | 7  | 19183280  |           | 0.30  | 1.18E-06 | 5.01E-04 |
| cg17189639 | 17 | 58216551  |           | 0.28  | 1.18E-06 | 5.01E-04 |
| cg07846297 | 4  | 174439990 |           | 0.26  | 1.18E-06 | 5.01E-04 |
| cg17437939 | 7  | 97361252  | TAC1      | 0.37  | 1.18E-06 | 5.01E-04 |
| cg09121339 | 2  | 7571733   |           | 0.23  | 1.18E-06 | 5.01E-04 |
| cg05987823 | 12 | 54428592  | HOXC4     | 0.31  | 1.19E-06 | 5.04E-04 |
| cg08823027 | 21 | 35831958  | KCNE1     | 0.31  | 1.19E-06 | 5.04E-04 |
| cg24596898 | 1  | 41849189  |           | -0.21 | 1.19E-06 | 5.04E-04 |
| cg03740167 | 10 | 23463746  |           | 0.29  | 1.20E-06 | 5.04E-04 |
| cg01710897 | 15 | 91497902  | RCCD1     | 0.28  | 1.20E-06 | 5.05E-04 |
| cg26682904 | 11 | 101787410 | ANGPTL5   | -0.20 | 1.20E-06 | 5.05E-04 |
| cg22717014 | 4  | 111542473 | PITX2     | 0.21  | 1.20E-06 | 5.05E-04 |
| cg24642523 | 14 | 65009265  | HSPA2     | 0.27  | 1.21E-06 | 5.06E-04 |
| cg16711011 | 2  | 568198    |           | -0.26 | 1.22E-06 | 5.09E-04 |
| cg19777067 | 4  | 174440103 |           | 0.31  | 1.22E-06 | 5.09E-04 |
| cg27268556 | 1  | 119542629 |           | 0.28  | 1.23E-06 | 5.13E-04 |
| cg09236819 | 11 | 64876055  | C11orf2   | -0.22 | 1.24E-06 | 5.15E-04 |
| cg04587910 | 2  | 220025744 | NHEJ1     | 0.24  | 1.25E-06 | 5.17E-04 |
| cg09655403 | 5  | 78985495  | CMYA5     | 0.33  | 1.25E-06 | 5.17E-04 |
| cg18928153 | 9  | 37030203  | PAX5      | 0.29  | 1.25E-06 | 5.17E-04 |
| cg26856924 | 1  | 119542573 |           | 0.27  | 1.25E-06 | 5.17E-04 |
| cg10993442 | 1  | 25257587  | RUNX3     | 0.22  | 1.26E-06 | 5.17E-04 |
| cg12556555 | 15 | 48484060  | CTXN2     | 0.25  | 1.26E-06 | 5.17E-04 |
| cg17491947 | 4  | 46994956  | GABRA4    | 0.21  | 1.26E-06 | 5.17E-04 |
| cg01993208 | 9  | 97808906  | C9orf3    | -0.22 | 1.27E-06 | 5.20E-04 |
| cg18758796 | 5  | 131593413 | PDLIM4    | 0.32  | 1.27E-06 | 5.20E-04 |
| cg05317714 | 8  | 145698116 | KIFC2     | 0.30  | 1.27E-06 | 5.20E-04 |
| cg25280938 | 7  | 6543803   | GRID2IP   | 0.23  | 1.27E-06 | 5.20E-04 |
| cg14712531 | 6  | 108485043 |           | 0.34  | 1.28E-06 | 5.20E-04 |
| cg06444282 | 1  | 20669975  | VWA5B1    | 0.31  | 1.28E-06 | 5.20E-04 |
| cg13628577 | 5  | 122431121 | PRDM6     | 0.29  | 1.28E-06 | 5.20E-04 |
| cg23967544 | 5  | 172672684 |           | 0.33  | 1.29E-06 | 5.21E-04 |
| cg04552206 | 10 | 102896546 | TLX1      | 0.25  | 1.29E-06 | 5.22E-04 |
| cg05124129 | 12 | 39299501  | CPNE8     | 0.29  | 1.30E-06 | 5.24E-04 |
| cg02788731 | 1  | 247751498 | OR2G2     | -0.26 | 1.30E-06 | 5.26E-04 |
| cg02829688 | 1  | 119527008 | TBX15     | 0.29  | 1.31E-06 | 5.26E-04 |
| cg01047586 | 2  | 176933407 |           | 0.27  | 1.31E-06 | 5.26E-04 |

|            |    |           |              |       |          |          |
|------------|----|-----------|--------------|-------|----------|----------|
| cg18944010 | 1  | 119522855 | TBX15        | 0.31  | 1.31E-06 | 5.26E-04 |
| cg10257870 | 5  | 78985484  | CMYA5        | 0.30  | 1.33E-06 | 5.33E-04 |
| cg23345004 | 18 | 44526430  | KATNAL2      | 0.28  | 1.34E-06 | 5.36E-04 |
| cg06775930 | 6  | 126069089 |              | 0.32  | 1.34E-06 | 5.37E-04 |
| cg07563793 | 1  | 75596336  | LHX8         | 0.32  | 1.35E-06 | 5.39E-04 |
| cg07162097 | 8  | 82634090  | ZFAND1       | -0.29 | 1.35E-06 | 5.39E-04 |
| cg18301423 | 5  | 131593218 | PDLIM4       | 0.34  | 1.35E-06 | 5.40E-04 |
| cg22851295 | 6  | 10881949  | GCM2         | 0.27  | 1.35E-06 | 5.40E-04 |
| cg02269388 | 12 | 49658421  | TUBA1C       | 0.31  | 1.36E-06 | 5.40E-04 |
| cg04013595 | 6  | 30484429  |              | 0.27  | 1.37E-06 | 5.45E-04 |
| cg06795233 | 2  | 219737392 | WNT6         | 0.23  | 1.37E-06 | 5.45E-04 |
| cg06718723 | 19 | 15236813  | ILVBL        | 0.30  | 1.38E-06 | 5.47E-04 |
| cg17842959 | 5  | 172664285 |              | 0.29  | 1.40E-06 | 5.51E-04 |
| cg26582457 | 11 | 5067183   | OR52J3       | -0.23 | 1.40E-06 | 5.52E-04 |
| cg20288916 | 11 | 56545039  |              | -0.23 | 1.40E-06 | 5.52E-04 |
| cg21890667 | 22 | 30476089  | HORMAD2      | 0.31  | 1.41E-06 | 5.53E-04 |
| cg05105138 | 11 | 5153834   | OR52A5       | -0.28 | 1.41E-06 | 5.54E-04 |
| cg14845909 | 5  | 851183    | ZDHHC11      | -0.21 | 1.41E-06 | 5.54E-04 |
| cg03051384 | 15 | 65197883  |              | 0.29  | 1.42E-06 | 5.55E-04 |
| cg20898829 | 20 | 3229660   |              | 0.29  | 1.44E-06 | 5.63E-04 |
| cg06109894 | 2  | 131185499 |              | 0.31  | 1.45E-06 | 5.65E-04 |
| cg03564727 | 19 | 49577206  | KCNA7        | -0.26 | 1.45E-06 | 5.65E-04 |
| cg11637712 | 17 | 36665844  | ARHGAP23     | 0.22  | 1.46E-06 | 5.65E-04 |
| cg23504411 | 6  | 27859160  | HIST1H3J     | 0.34  | 1.46E-06 | 5.65E-04 |
| cg08663152 | 19 | 48244519  | EHD2         | -0.25 | 1.47E-06 | 5.69E-04 |
| cg12222588 | 18 | 34823808  | BRUNOL4      | 0.30  | 1.48E-06 | 5.71E-04 |
| cg03541338 | 10 | 121301343 | RGS10        | 0.31  | 1.48E-06 | 5.71E-04 |
| cg03650946 | 7  | 27154562  | HOXA3        | 0.29  | 1.48E-06 | 5.73E-04 |
| cg01322405 | 21 | 40757317  | WRB          | -0.24 | 1.50E-06 | 5.77E-04 |
| cg22045225 | 12 | 114841792 | TBX5         | 0.25  | 1.51E-06 | 5.79E-04 |
| cg04873098 | 1  | 3165191   | PRDM16       | 0.24  | 1.52E-06 | 5.79E-04 |
| cg06235653 | 16 | 2287161   | DNASE1L2     | 0.29  | 1.52E-06 | 5.79E-04 |
| cg04528771 | 17 | 27893087  | ABHD15       | 0.24  | 1.52E-06 | 5.79E-04 |
| cg02161900 | 10 | 28035631  | MKX          | 0.30  | 1.52E-06 | 5.79E-04 |
| cg23639368 | 6  | 108485182 |              | 0.31  | 1.52E-06 | 5.79E-04 |
| cg11843238 | 5  | 131593191 | PDLIM4       | 0.37  | 1.52E-06 | 5.79E-04 |
| cg17222164 | 17 | 43339476  | LOC100133991 | 0.28  | 1.53E-06 | 5.79E-04 |
| cg18146843 | 1  | 53099248  | FAM159A      | 0.28  | 1.53E-06 | 5.79E-04 |
| cg27093637 | 11 | 5410452   | OR51M1       | -0.29 | 1.53E-06 | 5.79E-04 |
| cg12760869 | 12 | 49727110  | C1QL4        | 0.24  | 1.53E-06 | 5.79E-04 |
| cg04715503 | 16 | 3062795   | CLDN9        | 0.24  | 1.53E-06 | 5.79E-04 |
| cg14657532 | 2  | 219762543 |              | 0.23  | 1.53E-06 | 5.79E-04 |
| cg12674357 | 6  | 106957945 |              | 0.28  | 1.55E-06 | 5.84E-04 |
| cg05100070 | 6  | 100896760 | SIM1         | 0.24  | 1.55E-06 | 5.85E-04 |
| cg02352370 | 6  | 32054845  | TNXB         | 0.23  | 1.56E-06 | 5.85E-04 |
| cg14000361 | 6  | 10882336  | GCM2         | 0.31  | 1.56E-06 | 5.85E-04 |
| cg00297721 | 20 | 55200767  |              | 0.26  | 1.56E-06 | 5.85E-04 |
| cg24064266 | 13 | 100642451 |              | 0.33  | 1.56E-06 | 5.85E-04 |
| cg17390301 | 11 | 111250093 | POU2AF1      | -0.23 | 1.58E-06 | 5.88E-04 |
| cg26981309 | 6  | 100442002 | MCHR2        | 0.26  | 1.58E-06 | 5.89E-04 |
| cg01189783 | 6  | 100441581 | MCHR2        | 0.30  | 1.59E-06 | 5.91E-04 |
| cg13289364 | 11 | 48510647  | OR4A47       | -0.22 | 1.59E-06 | 5.91E-04 |
| cg01287088 | 5  | 176827392 | PFN3         | 0.31  | 1.60E-06 | 5.91E-04 |
| cg24690231 | 1  | 18437431  | IGSF21       | 0.27  | 1.60E-06 | 5.91E-04 |
| cg16799111 | 8  | 10589359  | SOX7         | 0.28  | 1.60E-06 | 5.91E-04 |
| cg21581821 | 1  | 190444666 | FAM5C        | 0.28  | 1.60E-06 | 5.91E-04 |
| cg14639847 | 12 | 54389982  |              | 0.32  | 1.62E-06 | 5.98E-04 |
| cg00625776 | 12 | 53297384  | KRT8         | 0.24  | 1.63E-06 | 5.99E-04 |
| cg16688434 | 13 | 110768551 |              | 0.27  | 1.63E-06 | 5.99E-04 |
| cg13356117 | 11 | 113185561 | TTC12        | 0.29  | 1.64E-06 | 6.01E-04 |
| cg18430152 | 7  | 27162401  | HOXA3        | 0.26  | 1.64E-06 | 6.01E-04 |
| cg15611336 | 15 | 75248496  | RPP25        | 0.31  | 1.65E-06 | 6.02E-04 |
| cg11990630 | 13 | 100641978 |              | 0.33  | 1.65E-06 | 6.02E-04 |
| cg01550055 | 1  | 119543216 |              | 0.29  | 1.66E-06 | 6.03E-04 |
| cg21581745 | 4  | 13538908  |              | 0.22  | 1.66E-06 | 6.03E-04 |
| cg11815682 | 21 | 44486381  | CBS          | -0.30 | 1.67E-06 | 6.04E-04 |

|            |    |           |         |       |          |          |
|------------|----|-----------|---------|-------|----------|----------|
| cg02596153 | 6  | 108497141 | NR2E1   | 0.30  | 1.67E-06 | 6.04E-04 |
| cg26364809 | 7  | 27145159  |         | 0.28  | 1.68E-06 | 6.08E-04 |
| cg26777836 | 3  | 26665815  | LRR3C3B | 0.29  | 1.68E-06 | 6.08E-04 |
| cg18866599 | 2  | 208635723 |         | 0.26  | 1.69E-06 | 6.08E-04 |
| cg13509195 | 12 | 39299716  | CPNE8   | 0.34  | 1.69E-06 | 6.08E-04 |
| cg14409414 | 17 | 77777649  |         | 0.23  | 1.69E-06 | 6.08E-04 |
| cg26206948 | 5  | 172663731 | NKX2-5  | 0.25  | 1.70E-06 | 6.09E-04 |
| cg26338453 | 15 | 82340023  |         | 0.21  | 1.70E-06 | 6.09E-04 |
| cg06118609 | 11 | 7982706   | NLRP10  | -0.21 | 1.70E-06 | 6.09E-04 |
| cg19068510 | 13 | 100642106 |         | 0.31  | 1.70E-06 | 6.10E-04 |
| cg04007303 | 9  | 100618041 | FOXE1   | 0.25  | 1.71E-06 | 6.10E-04 |
| cg07891179 | 7  | 29923883  | WIPF3   | 0.26  | 1.71E-06 | 6.10E-04 |
| cg20598190 | 2  | 240866924 |         | -0.24 | 1.71E-06 | 6.10E-04 |
| cg04105342 | 4  | 30724841  | PCDH7   | 0.26  | 1.71E-06 | 6.10E-04 |
| cg26561681 | 1  | 21376633  | EIF4G3  | -0.21 | 1.73E-06 | 6.13E-04 |
| cg06116636 | 1  | 101775294 |         | 0.31  | 1.73E-06 | 6.13E-04 |
| cg15864691 | 7  | 27217606  | HOXA10  | -0.26 | 1.73E-06 | 6.14E-04 |
| cg01166759 | 17 | 21934487  |         | 0.21  | 1.76E-06 | 6.20E-04 |
| cg12139725 | 1  | 38219781  | EPHA10  | 0.31  | 1.76E-06 | 6.22E-04 |
| cg19628469 | 19 | 856107    | ELANE   | -0.20 | 1.77E-06 | 6.22E-04 |
| cg11528176 | 7  | 42928293  |         | 0.28  | 1.77E-06 | 6.22E-04 |
| cg10788217 | 11 | 113185148 | TTC12   | 0.30  | 1.78E-06 | 6.22E-04 |
| cg01790002 | 7  | 27283545  | EVX1    | 0.32  | 1.78E-06 | 6.22E-04 |
| cg26848718 | 11 | 32454975  | WT1     | 0.30  | 1.78E-06 | 6.22E-04 |
| cg22796922 | 7  | 48031800  | SUNC1   | 0.26  | 1.78E-06 | 6.22E-04 |
| cg07268332 | 11 | 10476494  | AMPD3   | 0.24  | 1.78E-06 | 6.22E-04 |
| cg13421062 | 7  | 35301069  |         | 0.29  | 1.79E-06 | 6.23E-04 |
| cg02081006 | 5  | 122430434 | PRDM6   | 0.30  | 1.80E-06 | 6.25E-04 |
| cg02063759 | 1  | 119543295 |         | 0.33  | 1.80E-06 | 6.26E-04 |
| cg04149978 | 1  | 10764896  | CASZ1   | -0.21 | 1.81E-06 | 6.27E-04 |
| cg21729992 | 20 | 55200370  |         | 0.31  | 1.81E-06 | 6.27E-04 |
| cg11916478 | 12 | 213776    | IQSEC3  | -0.25 | 1.81E-06 | 6.27E-04 |
| cg25533993 | 19 | 50550284  | ZNF473  | 0.27  | 1.82E-06 | 6.29E-04 |
| cg21871952 | 1  | 111814146 |         | 0.22  | 1.83E-06 | 6.29E-04 |
| cg19848940 | 12 | 112250795 |         | -0.27 | 1.83E-06 | 6.29E-04 |
| cg14892281 | 11 | 113185247 | TTC12   | 0.20  | 1.83E-06 | 6.29E-04 |
| cg16565394 | 6  | 100896674 | SIM1    | 0.25  | 1.83E-06 | 6.29E-04 |
| cg01310750 | 19 | 52996548  | ZNF578  | 0.20  | 1.84E-06 | 6.29E-04 |
| cg21134232 | 7  | 27155548  | HOXA3   | 0.28  | 1.84E-06 | 6.29E-04 |
| cg25775494 | 6  | 108490895 | NR2E1   | 0.31  | 1.84E-06 | 6.29E-04 |
| cg13702536 | 12 | 123215553 | GPR81   | -0.29 | 1.85E-06 | 6.29E-04 |
| cg08832842 | 21 | 15197291  |         | 0.21  | 1.85E-06 | 6.29E-04 |
| cg03148184 | 4  | 111562513 |         | 0.28  | 1.85E-06 | 6.29E-04 |
| cg00395210 | 12 | 48592465  |         | 0.28  | 1.85E-06 | 6.29E-04 |
| cg25334575 | 13 | 100641744 |         | 0.32  | 1.85E-06 | 6.30E-04 |
| cg15134714 | 8  | 37558448  |         | 0.21  | 1.86E-06 | 6.30E-04 |
| cg00318947 | 7  | 27154914  | HOXA3   | 0.26  | 1.86E-06 | 6.30E-04 |
| cg22772747 | 7  | 27164285  | HOXA3   | 0.28  | 1.86E-06 | 6.30E-04 |
| cg25650956 | 17 | 10422077  | MYH1    | -0.22 | 1.87E-06 | 6.31E-04 |
| cg00611789 | 5  | 78985432  | CMYA5   | 0.33  | 1.88E-06 | 6.34E-04 |
| cg16047053 | 11 | 57972613  | OR1S2   | -0.22 | 1.88E-06 | 6.34E-04 |
| cg04624601 | 12 | 113910385 | LHX5    | 0.23  | 1.89E-06 | 6.35E-04 |
| cg11602901 | 3  | 62354878  |         | 0.25  | 1.89E-06 | 6.35E-04 |
| cg19797536 | 7  | 91909243  | ANKIB1  | -0.24 | 1.89E-06 | 6.35E-04 |
| cg19186614 | 12 | 214194    | IQSEC3  | -0.22 | 1.89E-06 | 6.35E-04 |
| cg22840780 | 13 | 58207650  | PCDH17  | 0.31  | 1.89E-06 | 6.35E-04 |
| cg08553601 | 4  | 53729461  | RASL11B | 0.24  | 1.90E-06 | 6.35E-04 |
| cg24546155 | 18 | 44786426  |         | 0.28  | 1.90E-06 | 6.37E-04 |
| cg08425070 | 7  | 75864319  | SRRM3   | 0.24  | 1.91E-06 | 6.39E-04 |
| cg18244817 | 5  | 42949610  |         | 0.30  | 1.91E-06 | 6.39E-04 |
| cg22871653 | 1  | 119535817 |         | 0.31  | 1.93E-06 | 6.43E-04 |
| cg18829827 | 5  | 122422500 |         | 0.31  | 1.93E-06 | 6.43E-04 |
| cg02343962 | 15 | 70233653  |         | 0.22  | 1.93E-06 | 6.43E-04 |
| cg14620572 | 9  | 127215669 | GPR144  | 0.26  | 1.94E-06 | 6.45E-04 |
| cg22664614 | 7  | 129991187 | CPA5    | -0.25 | 1.95E-06 | 6.46E-04 |
| cg19258034 | 19 | 41055125  | SPTBN4  | 0.30  | 1.95E-06 | 6.47E-04 |

|            |    |           |           |       |          |          |
|------------|----|-----------|-----------|-------|----------|----------|
| cg22864077 | 2  | 131185333 |           | 0.23  | 1.97E-06 | 6.51E-04 |
| cg10959198 | 15 | 93632896  | RGMA      | 0.35  | 1.97E-06 | 6.51E-04 |
| cg00295794 | 13 | 100641409 |           | 0.36  | 1.98E-06 | 6.55E-04 |
| cg02235529 | 11 | 56311179  | OR8U8     | -0.29 | 1.99E-06 | 6.56E-04 |
| cg22685215 | 1  | 178232856 | RASAL2    | -0.24 | 1.99E-06 | 6.56E-04 |
| cg11337945 | 5  | 2755158   | C5orf38   | 0.32  | 2.00E-06 | 6.57E-04 |
| cg08461949 | 19 | 52104632  |           | 0.30  | 2.00E-06 | 6.57E-04 |
| cg23245905 | 10 | 99735133  | CRTAC1    | 0.26  | 2.01E-06 | 6.59E-04 |
| cg06119874 | 1  | 207225424 | PFKFB2    | -0.25 | 2.05E-06 | 6.70E-04 |
| cg02504902 | 8  | 53326922  |           | -0.27 | 2.06E-06 | 6.70E-04 |
| cg14326413 | 4  | 81123380  | PRDM8     | 0.34  | 2.06E-06 | 6.70E-04 |
| cg01978237 | 6  | 100896803 | SIM1      | 0.28  | 2.06E-06 | 6.70E-04 |
| cg02699218 | 5  | 132150128 | ANKRD43   | 0.29  | 2.06E-06 | 6.70E-04 |
| cg25579180 | 7  | 71098623  | WBSCR17   | 0.22  | 2.07E-06 | 6.70E-04 |
| cg03719428 | 12 | 54376094  |           | 0.23  | 2.07E-06 | 6.70E-04 |
| cg23680922 | 19 | 52104997  |           | 0.21  | 2.07E-06 | 6.70E-04 |
| cg12520549 | 2  | 162280741 | TBR1      | 0.26  | 2.08E-06 | 6.72E-04 |
| cg07465387 | 14 | 38058263  |           | 0.28  | 2.08E-06 | 6.72E-04 |
| cg06654537 | 13 | 100641317 |           | 0.30  | 2.08E-06 | 6.72E-04 |
| cg17740822 | 12 | 89744609  | DUSP6     | 0.29  | 2.09E-06 | 6.73E-04 |
| cg16890796 | 19 | 49937087  | SLC17A7   | 0.23  | 2.09E-06 | 6.73E-04 |
| cg24565742 | 13 | 21650374  |           | 0.23  | 2.09E-06 | 6.73E-04 |
| cg02026204 | 22 | 30663007  | OSM       | -0.20 | 2.10E-06 | 6.74E-04 |
| cg08579858 | 22 | 29709964  | RASL10A   | 0.26  | 2.11E-06 | 6.77E-04 |
| cg02750262 | 18 | 72916776  | ZADH2     | 0.28  | 2.12E-06 | 6.77E-04 |
| cg21849844 | 13 | 100611865 |           | 0.32  | 2.12E-06 | 6.77E-04 |
| cg20729747 | 12 | 14928083  | H2AFJ     | 0.30  | 2.13E-06 | 6.79E-04 |
| cg01070065 | 1  | 32714023  | FAM167B   | 0.21  | 2.13E-06 | 6.80E-04 |
| cg22154659 | 7  | 27134369  | HOXA1     | 0.28  | 2.14E-06 | 6.82E-04 |
| cg12061531 | 17 | 21729912  |           | 0.22  | 2.15E-06 | 6.84E-04 |
| cg11273947 | 15 | 68120757  | LBXCOR1   | 0.30  | 2.15E-06 | 6.84E-04 |
| cg27564792 | 3  | 62360162  | FEZF2     | 0.27  | 2.15E-06 | 6.84E-04 |
| cg14450231 | 5  | 172199425 | DUSP1     | 0.24  | 2.17E-06 | 6.88E-04 |
| cg05656688 | 1  | 25254088  | RUNX3     | -0.21 | 2.17E-06 | 6.89E-04 |
| cg04352304 | 10 | 102475896 |           | 0.26  | 2.17E-06 | 6.89E-04 |
| cg02719608 | 17 | 77776428  |           | 0.26  | 2.19E-06 | 6.92E-04 |
| cg19519964 | 2  | 223290012 | SGPP2     | 0.28  | 2.20E-06 | 6.94E-04 |
| cg12177743 | 11 | 113185079 | TTC12     | 0.32  | 2.20E-06 | 6.95E-04 |
| cg13425960 | 19 | 50550359  | ZNF473    | 0.22  | 2.21E-06 | 6.96E-04 |
| cg21158087 | 17 | 58216415  |           | 0.31  | 2.21E-06 | 6.96E-04 |
| cg08906307 | 1  | 221065434 |           | 0.23  | 2.22E-06 | 6.98E-04 |
| cg22498143 | 19 | 40993991  | SPTBN4    | 0.28  | 2.23E-06 | 7.02E-04 |
| cg23842796 | 1  | 156358404 |           | 0.26  | 2.24E-06 | 7.05E-04 |
| cg06530563 | 12 | 115132889 |           | 0.21  | 2.25E-06 | 7.05E-04 |
| cg10977643 | 14 | 97082103  |           | -0.26 | 2.26E-06 | 7.05E-04 |
| cg00402417 | 13 | 100649423 |           | 0.30  | 2.26E-06 | 7.05E-04 |
| cg26123256 | 2  | 27530670  | UCN       | 0.23  | 2.26E-06 | 7.05E-04 |
| cg06008480 | 11 | 113185089 | TTC12     | 0.33  | 2.26E-06 | 7.05E-04 |
| cg14621323 | 5  | 176827161 | PFN3      | 0.26  | 2.27E-06 | 7.06E-04 |
| cg21516287 | 7  | 150020855 | ACTR3C    | 0.24  | 2.27E-06 | 7.06E-04 |
| cg13537061 | 7  | 35298720  |           | 0.22  | 2.27E-06 | 7.06E-04 |
| cg13888838 | 2  | 220025712 | NHEJ1     | 0.25  | 2.28E-06 | 7.07E-04 |
| cg27478313 | 6  | 1624720   | GMDS      | 0.27  | 2.29E-06 | 7.08E-04 |
| cg08929002 | 6  | 108496991 | NR2E1     | 0.25  | 2.30E-06 | 7.08E-04 |
| cg10050816 | 16 | 86549237  |           | 0.26  | 2.33E-06 | 7.15E-04 |
| cg17651959 | 20 | 21498100  |           | 0.30  | 2.33E-06 | 7.16E-04 |
| cg02454982 | 1  | 3689201   | LOC388588 | 0.28  | 2.34E-06 | 7.16E-04 |
| cg18827332 | 12 | 103344506 |           | 0.22  | 2.35E-06 | 7.19E-04 |
| cg08458733 | 8  | 37555577  | ZNF703    | 0.23  | 2.35E-06 | 7.19E-04 |
| cg02390319 | 1  | 3310268   | PRDM16    | 0.30  | 2.36E-06 | 7.20E-04 |
| cg03592166 | 11 | 70668691  | SHANK2    | -0.24 | 2.37E-06 | 7.21E-04 |
| cg11772171 | 11 | 2292544   | ASCL2     | 0.29  | 2.37E-06 | 7.21E-04 |
| cg11873482 | 7  | 97361244  | TAC1      | 0.33  | 2.37E-06 | 7.21E-04 |
| cg23684204 | 15 | 91497937  | RCCD1     | 0.28  | 2.39E-06 | 7.25E-04 |
| cg01277155 | 7  | 103086237 | SLC26A5   | 0.26  | 2.39E-06 | 7.25E-04 |
| cg15579587 | 2  | 238600061 | LRRFIP1   | 0.26  | 2.41E-06 | 7.31E-04 |

|            |    |           |          |       |          |          |
|------------|----|-----------|----------|-------|----------|----------|
| cg10811961 | 12 | 54090346  |          | 0.26  | 2.45E-06 | 7.41E-04 |
| cg17893742 | 15 | 99967055  |          | -0.21 | 2.45E-06 | 7.41E-04 |
| cg06000330 | 7  | 19183231  |          | 0.27  | 2.46E-06 | 7.42E-04 |
| cg17359076 | 12 | 49658802  | TUBA1C   | 0.30  | 2.46E-06 | 7.42E-04 |
| cg02995271 | 8  | 144816322 | FAM83H   | 0.28  | 2.47E-06 | 7.43E-04 |
| cg04193160 | 1  | 228400419 | OBSCN    | 0.25  | 2.47E-06 | 7.43E-04 |
| cg06820006 | 12 | 131488926 | GPR133   | -0.22 | 2.48E-06 | 7.45E-04 |
| cg26952803 | 10 | 63926610  |          | -0.26 | 2.48E-06 | 7.45E-04 |
| cg01814191 | 12 | 89744524  | DUSP6    | 0.29  | 2.48E-06 | 7.45E-04 |
| cg21837192 | 12 | 54398765  |          | 0.26  | 2.48E-06 | 7.45E-04 |
| cg15383322 | 7  | 98100419  |          | 0.24  | 2.49E-06 | 7.45E-04 |
| cg17210929 | 1  | 17034180  | ESPNP    | 0.24  | 2.49E-06 | 7.46E-04 |
| cg16762841 | 13 | 100646453 |          | 0.33  | 2.50E-06 | 7.47E-04 |
| cg05546863 | 16 | 66613220  | CMTM2    | 0.24  | 2.52E-06 | 7.51E-04 |
| cg15925940 | 14 | 105330630 | KIAA0284 | 0.24  | 2.52E-06 | 7.51E-04 |
| cg01387972 | 19 | 15550968  | WIZ      | -0.21 | 2.52E-06 | 7.51E-04 |
| cg17918002 | 10 | 28035719  | MKX      | 0.29  | 2.53E-06 | 7.52E-04 |
| cg24235037 | 2  | 160919532 | PLA2R1   | 0.23  | 2.55E-06 | 7.54E-04 |
| cg04744409 | 6  | 105388191 |          | 0.26  | 2.55E-06 | 7.54E-04 |
| cg22778421 | 12 | 12849229  | GPR19    | 0.33  | 2.55E-06 | 7.54E-04 |
| cg23130075 | 11 | 67418365  | ACY3     | -0.21 | 2.56E-06 | 7.56E-04 |
| cg01323148 | 2  | 206551212 | NRP2     | 0.31  | 2.56E-06 | 7.56E-04 |
| cg27555365 | 17 | 7338618   | TMEM102  | 0.29  | 2.56E-06 | 7.56E-04 |
| cg25814096 | 17 | 73782472  | UNK      | 0.21  | 2.58E-06 | 7.60E-04 |
| cg00860808 | 2  | 171670500 |          | 0.28  | 2.61E-06 | 7.67E-04 |
| cg09236658 | 6  | 108485152 |          | 0.30  | 2.61E-06 | 7.67E-04 |
| cg20180370 | 6  | 50691003  | TFAP2D   | 0.28  | 2.62E-06 | 7.69E-04 |
| cg04639421 | 6  | 32411897  | HLA-DRA  | -0.27 | 2.63E-06 | 7.69E-04 |
| cg14896559 | 19 | 3481957   | C19orf77 | 0.20  | 2.63E-06 | 7.69E-04 |
| cg01832036 | 17 | 48050274  | DLX4     | 0.31  | 2.63E-06 | 7.69E-04 |
| cg10170049 | 15 | 94774288  |          | 0.30  | 2.63E-06 | 7.69E-04 |
| cg02119840 | 7  | 150020900 | ACTR3C   | 0.20  | 2.64E-06 | 7.69E-04 |
| cg17980283 | 2  | 45156642  |          | 0.22  | 2.64E-06 | 7.70E-04 |
| cg07145683 | 12 | 53297443  | KRT8     | 0.28  | 2.65E-06 | 7.71E-04 |
| cg16105676 | 6  | 108497424 | NR2E1    | 0.29  | 2.65E-06 | 7.72E-04 |
| cg15006175 | 8  | 145698660 | KIFC2    | 0.35  | 2.66E-06 | 7.72E-04 |
| cg13985518 | 7  | 27143788  | HOXA2    | 0.25  | 2.66E-06 | 7.72E-04 |
| cg07239716 | 12 | 89744488  | DUSP6    | 0.30  | 2.66E-06 | 7.72E-04 |
| cg12386646 | 15 | 41787261  | ITPKA    | 0.28  | 2.67E-06 | 7.73E-04 |
| cg22560214 | 4  | 13531213  |          | 0.28  | 2.67E-06 | 7.74E-04 |
| cg21493516 | 12 | 54446033  | HOXC4    | 0.30  | 2.68E-06 | 7.77E-04 |
| cg08668790 | 19 | 58220662  | ZNF154   | 0.31  | 2.69E-06 | 7.77E-04 |
| cg20025656 | 1  | 229570230 | ACTA1    | 0.23  | 2.70E-06 | 7.78E-04 |
| cg00157796 | 6  | 159590231 | FNDC1    | 0.27  | 2.72E-06 | 7.85E-04 |
| cg02091103 | 9  | 79637730  |          | 0.24  | 2.73E-06 | 7.85E-04 |
| cg09975995 | 4  | 175899203 | ADAM29   | -0.27 | 2.73E-06 | 7.86E-04 |
| cg07270153 | 7  | 19185260  | FERD3L   | 0.27  | 2.74E-06 | 7.87E-04 |
| cg04154027 | 5  | 78985588  | CMYA5    | 0.32  | 2.74E-06 | 7.87E-04 |
| cg13980454 | 14 | 36985905  | NKX2-1   | 0.21  | 2.74E-06 | 7.87E-04 |
| cg14266527 | 4  | 151501298 | LRBA     | 0.27  | 2.75E-06 | 7.87E-04 |
| cg22410026 | 6  | 30483923  |          | 0.26  | 2.75E-06 | 7.87E-04 |
| cg10542584 | 3  | 62356223  | FEZF2    | 0.25  | 2.75E-06 | 7.87E-04 |
| cg03255379 | 2  | 85531470  | TCF7L1   | -0.22 | 2.75E-06 | 7.87E-04 |
| cg14832317 | 4  | 13526597  |          | 0.21  | 2.76E-06 | 7.87E-04 |
| cg11644586 | 11 | 66360200  | CCDC87   | 0.23  | 2.76E-06 | 7.88E-04 |
| cg03913859 | 2  | 177399921 |          | -0.30 | 2.77E-06 | 7.88E-04 |
| cg09516476 | 6  | 10881925  | GCM2     | 0.28  | 2.77E-06 | 7.89E-04 |
| cg15042866 | 3  | 27755970  |          | 0.31  | 2.77E-06 | 7.89E-04 |
| cg09936190 | 10 | 43892956  | HNRNPF   | 0.26  | 2.78E-06 | 7.91E-04 |
| cg13193239 | 4  | 111539479 | PITX2    | 0.24  | 2.79E-06 | 7.91E-04 |
| cg26801014 | 11 | 88241769  | GRM5     | 0.23  | 2.79E-06 | 7.91E-04 |
| cg00158122 | 10 | 101290029 |          | 0.23  | 2.79E-06 | 7.91E-04 |
| cg26195829 | 14 | 61122155  |          | 0.24  | 2.80E-06 | 7.92E-04 |
| cg06776146 | 13 | 100649131 |          | 0.31  | 2.80E-06 | 7.92E-04 |
| cg09513416 | 6  | 71319075  |          | -0.22 | 2.80E-06 | 7.92E-04 |
| cg24157892 | 17 | 59473707  |          | 0.33  | 2.81E-06 | 7.93E-04 |



|            |    |           |           |       |          |          |
|------------|----|-----------|-----------|-------|----------|----------|
| cg20433275 | 1  | 156358408 |           | 0.29  | 2.81E-06 | 7.93E-04 |
| cg01218896 | 15 | 96911988  |           | 0.21  | 2.81E-06 | 7.93E-04 |
| cg04387835 | 17 | 4649076   | ZMYND15   | 0.28  | 2.81E-06 | 7.93E-04 |
| cg06759189 | 17 | 77777947  |           | 0.23  | 2.83E-06 | 7.93E-04 |
| cg17180237 | 1  | 119545275 |           | 0.24  | 2.83E-06 | 7.93E-04 |
| cg01950845 | 15 | 93632730  | RGMA      | 0.33  | 2.83E-06 | 7.93E-04 |
| cg09068158 | 1  | 53098641  | FAM159A   | 0.25  | 2.84E-06 | 7.93E-04 |
| cg13417420 | 12 | 12849159  | GPR19     | 0.32  | 2.84E-06 | 7.93E-04 |
| cg22776912 | 15 | 81630789  | TMC3      | -0.26 | 2.86E-06 | 7.95E-04 |
| cg06928993 | 19 | 49313421  | BCAT2     | -0.21 | 2.86E-06 | 7.95E-04 |
| cg09825979 | 7  | 27179432  |           | 0.26  | 2.87E-06 | 7.95E-04 |
| cg07751277 | 13 | 100642487 |           | 0.34  | 2.87E-06 | 7.95E-04 |
| cg23724858 | 6  | 32055711  | TNXB      | 0.26  | 2.87E-06 | 7.95E-04 |
| cg09854515 | 4  | 111554385 | PITX2     | 0.22  | 2.88E-06 | 7.98E-04 |
| cg21858255 | 12 | 104609609 | TXNRD1    | 0.31  | 2.89E-06 | 7.98E-04 |
| cg01456368 | 3  | 52351859  | DNAH1     | 0.27  | 2.89E-06 | 7.99E-04 |
| cg04285666 | 5  | 122422863 |           | 0.28  | 2.89E-06 | 7.99E-04 |
| cg00116092 | 1  | 217313044 |           | 0.30  | 2.90E-06 | 7.99E-04 |
| cg20695936 | 1  | 25257624  | RUNX3     | 0.24  | 2.91E-06 | 7.99E-04 |
| cg06928346 | 12 | 12849096  | GPR19     | 0.33  | 2.91E-06 | 7.99E-04 |
| cg01792403 | 13 | 100626995 |           | 0.30  | 2.92E-06 | 8.03E-04 |
| cg15957748 | 4  | 146267426 |           | -0.28 | 2.95E-06 | 8.10E-04 |
| cg18573327 | 12 | 115123875 |           | 0.24  | 2.96E-06 | 8.11E-04 |
| cg07501233 | 13 | 100641900 |           | 0.33  | 2.97E-06 | 8.14E-04 |
| cg09907170 | 2  | 111877177 | BCL2L11   | 0.26  | 2.99E-06 | 8.17E-04 |
| cg27624162 | 2  | 111876008 |           | 0.25  | 3.02E-06 | 8.22E-04 |
| cg22747650 | 7  | 150020218 | LRRC61    | 0.21  | 3.02E-06 | 8.22E-04 |
| cg06158650 | 1  | 119522637 | TBX15     | 0.31  | 3.02E-06 | 8.23E-04 |
| cg20249584 | 1  | 233462803 | KIAA1804  | 0.28  | 3.04E-06 | 8.27E-04 |
| cg21165027 | 5  | 172663784 | NKX2-5    | 0.25  | 3.04E-06 | 8.27E-04 |
| cg05971894 | 12 | 54399254  |           | 0.21  | 3.04E-06 | 8.27E-04 |
| cg22765426 | 6  | 30483837  |           | 0.22  | 3.05E-06 | 8.27E-04 |
| cg02293817 | 7  | 35808294  | LOC442293 | -0.24 | 3.06E-06 | 8.28E-04 |
| cg11856078 | 2  | 157178165 |           | 0.33  | 3.07E-06 | 8.28E-04 |
| cg15037137 | 7  | 27144302  |           | 0.25  | 3.07E-06 | 8.28E-04 |
| cg21748207 | 2  | 26395359  | FAM59B    | 0.24  | 3.07E-06 | 8.28E-04 |
| cg20114732 | 6  | 166579135 | T         | 0.30  | 3.07E-06 | 8.28E-04 |
| cg23319696 | 5  | 2111870   |           | -0.24 | 3.08E-06 | 8.28E-04 |
| cg22197708 | 11 | 59855616  | MS4A2     | -0.26 | 3.10E-06 | 8.31E-04 |
| cg09284655 | 14 | 70317228  |           | 0.26  | 3.10E-06 | 8.31E-04 |
| cg26027669 | 1  | 92952467  | GFI1      | 0.34  | 3.10E-06 | 8.31E-04 |
| cg02019988 | 3  | 50311211  | SEMA3B    | 0.21  | 3.11E-06 | 8.32E-04 |
| cg07541701 | 12 | 54389934  |           | 0.26  | 3.13E-06 | 8.35E-04 |
| cg22288577 | 15 | 91498497  | RCCD1     | 0.29  | 3.14E-06 | 8.37E-04 |
| cg26314330 | 3  | 27772633  |           | 0.31  | 3.14E-06 | 8.37E-04 |
| cg05650846 | 16 | 3078142   | CCDC64B   | 0.26  | 3.15E-06 | 8.37E-04 |
| cg20489026 | 1  | 160053931 | KCNJ9     | 0.28  | 3.15E-06 | 8.37E-04 |
| cg11431402 | 9  | 126135408 | CRB2      | -0.23 | 3.15E-06 | 8.37E-04 |
| cg09143673 | 5  | 172664439 |           | 0.30  | 3.15E-06 | 8.37E-04 |
| cg14042889 | 7  | 27169208  | HOXA4     | 0.23  | 3.16E-06 | 8.38E-04 |
| cg12062819 | 1  | 156358231 |           | 0.34  | 3.16E-06 | 8.38E-04 |
| cg11689813 | 1  | 229570052 | ACTA1     | 0.30  | 3.17E-06 | 8.40E-04 |
| cg09662411 | 1  | 92946132  | GFI1      | 0.21  | 3.18E-06 | 8.40E-04 |
| cg04250451 | 1  | 25257784  | RUNX3     | 0.26  | 3.18E-06 | 8.40E-04 |
| cg03729251 | 4  | 151501035 | LRBA      | 0.31  | 3.18E-06 | 8.40E-04 |
| cg22322465 | 4  | 174459201 | NBLA00301 | 0.27  | 3.19E-06 | 8.40E-04 |
| cg14308479 | 11 | 2292677   | ASCL2     | 0.24  | 3.19E-06 | 8.40E-04 |
| cg05907933 | 5  | 77268888  |           | 0.31  | 3.21E-06 | 8.45E-04 |
| cg01268824 | 19 | 58220818  | ZNF154    | 0.30  | 3.22E-06 | 8.46E-04 |
| cg11092487 | 20 | 33585188  | MYH7B     | 0.26  | 3.22E-06 | 8.46E-04 |
| cg14435720 | 9  | 139565087 | EGFL7     | -0.21 | 3.24E-06 | 8.48E-04 |
| cg26249834 | 14 | 52479816  | NID2      | -0.20 | 3.25E-06 | 8.50E-04 |
| cg13987489 | 14 | 99664107  | BCL11B    | -0.22 | 3.26E-06 | 8.51E-04 |
| cg13213810 | 22 | 51158720  | SHANK3    | 0.29  | 3.28E-06 | 8.55E-04 |
| cg17775899 | 7  | 27179426  |           | 0.21  | 3.30E-06 | 8.60E-04 |
| cg18087266 | 1  | 25257629  | RUNX3     | 0.21  | 3.31E-06 | 8.63E-04 |

|            |    |           |              |       |          |          |
|------------|----|-----------|--------------|-------|----------|----------|
| cg02539083 | 7  | 97361148  | TAC1         | 0.27  | 3.32E-06 | 8.64E-04 |
| cg00062245 | 17 | 42462260  | ITGA2B       | 0.23  | 3.33E-06 | 8.64E-04 |
| cg22236681 | 4  | 146267610 |              | -0.29 | 3.33E-06 | 8.64E-04 |
| cg01830023 | 5  | 134374439 |              | 0.23  | 3.34E-06 | 8.66E-04 |
| cg26489413 | 11 | 10476976  | AMPD3        | 0.22  | 3.35E-06 | 8.68E-04 |
| cg22886139 | 5  | 140306985 | PCDHAC1      | 0.20  | 3.36E-06 | 8.69E-04 |
| cg09232478 | 1  | 119548852 |              | 0.29  | 3.37E-06 | 8.70E-04 |
| cg07060505 | 12 | 116756136 |              | -0.23 | 3.39E-06 | 8.74E-04 |
| cg15368905 | 6  | 78172337  | HTR1B        | 0.32  | 3.39E-06 | 8.74E-04 |
| cg19968840 | 15 | 45409319  | DUOXA2       | 0.32  | 3.43E-06 | 8.80E-04 |
| cg08640790 | 15 | 91498075  | RCCD1        | 0.29  | 3.45E-06 | 8.85E-04 |
| cg08287724 | 21 | 35832141  | KCNE1        | 0.27  | 3.45E-06 | 8.85E-04 |
| cg08302771 | 16 | 56710256  | MT1IP        | 0.21  | 3.48E-06 | 8.90E-04 |
| cg01287975 | 7  | 97361241  | TAC1         | 0.34  | 3.48E-06 | 8.90E-04 |
| cg24632241 | 2  | 80530431  | CTNNA2       | 0.35  | 3.49E-06 | 8.93E-04 |
| cg07645844 | 8  | 26722635  | ADRA1A       | 0.26  | 3.50E-06 | 8.93E-04 |
| cg27632435 | 12 | 49658821  | TUBA1C       | 0.33  | 3.50E-06 | 8.93E-04 |
| cg04740898 | 17 | 56402669  | BZRAP1       | 0.20  | 3.51E-06 | 8.94E-04 |
| cg05270922 | 1  | 101775452 |              | 0.34  | 3.51E-06 | 8.94E-04 |
| cg11907262 | 19 | 34310911  |              | 0.24  | 3.53E-06 | 8.98E-04 |
| cg23426238 | 7  | 103086367 | SLC26A5      | 0.28  | 3.53E-06 | 8.98E-04 |
| cg22129545 | 2  | 27531320  | UCN          | 0.30  | 3.54E-06 | 8.99E-04 |
| cg15683295 | 7  | 27245542  |              | 0.26  | 3.56E-06 | 9.04E-04 |
| cg08048194 | 12 | 55641538  | OR6C74       | -0.24 | 3.56E-06 | 9.04E-04 |
| cg16167240 | 11 | 122852284 | BSX          | 0.25  | 3.57E-06 | 9.05E-04 |
| cg08452061 | 5  | 172199642 | DUSP1        | 0.25  | 3.58E-06 | 9.07E-04 |
| cg21966075 | 1  | 156358066 |              | 0.22  | 3.58E-06 | 9.07E-04 |
| cg23461714 | 11 | 113184990 | TTC12        | 0.31  | 3.61E-06 | 9.12E-04 |
| cg19289461 | 16 | 30394812  | Sep-01       | -0.23 | 3.62E-06 | 9.12E-04 |
| cg18120446 | 4  | 13531076  |              | 0.29  | 3.63E-06 | 9.12E-04 |
| cg22409854 | 6  | 88877301  |              | 0.31  | 3.63E-06 | 9.12E-04 |
| cg09287190 | 13 | 100640914 |              | 0.33  | 3.63E-06 | 9.12E-04 |
| cg21831481 | 4  | 41880604  |              | 0.24  | 3.63E-06 | 9.12E-04 |
| cg23049226 | 15 | 102182534 | TM2D3        | -0.20 | 3.64E-06 | 9.12E-04 |
| cg07496173 | 7  | 57472222  |              | -0.22 | 3.65E-06 | 9.12E-04 |
| cg08762750 | 15 | 91497995  | RCCD1        | 0.26  | 3.66E-06 | 9.13E-04 |
| cg27402429 | 3  | 72788294  |              | 0.28  | 3.66E-06 | 9.13E-04 |
| cg25923207 | 11 | 62192276  |              | 0.27  | 3.68E-06 | 9.17E-04 |
| cg08124910 | 17 | 43339515  | LOC100133991 | 0.25  | 3.69E-06 | 9.19E-04 |
| cg07660236 | 6  | 28367883  | ZSCAN12      | 0.25  | 3.70E-06 | 9.20E-04 |
| cg03701266 | 5  | 10649678  | ANKRD33B     | 0.22  | 3.72E-06 | 9.21E-04 |
| cg25600049 | 13 | 53419729  | PCDH8        | 0.28  | 3.73E-06 | 9.22E-04 |
| cg07845581 | 17 | 56326510  | LPO          | 0.21  | 3.73E-06 | 9.22E-04 |
| cg10094489 | 7  | 155599026 | SHH          | 0.23  | 3.75E-06 | 9.25E-04 |
| cg17158913 | 1  | 10764886  | CASZ1        | -0.24 | 3.76E-06 | 9.27E-04 |
| cg12564285 | 5  | 131593104 | PDLIM4       | 0.27  | 3.77E-06 | 9.27E-04 |
| cg21752601 | 2  | 27531310  | UCN          | 0.26  | 3.78E-06 | 9.29E-04 |
| cg03379552 | 10 | 99734662  | CRTAC1       | 0.25  | 3.78E-06 | 9.29E-04 |
| cg11374425 | 3  | 62359677  | FEZF2        | 0.33  | 3.80E-06 | 9.33E-04 |
| cg23461615 | 7  | 103086074 | SLC26A5      | 0.28  | 3.86E-06 | 9.43E-04 |
| cg21963535 | 20 | 44098285  | WFDC2        | 0.24  | 3.88E-06 | 9.46E-04 |
| cg26885268 | 7  | 149389941 |              | 0.27  | 3.88E-06 | 9.46E-04 |
| cg09591524 | 7  | 27150031  | HOXA3        | 0.26  | 3.89E-06 | 9.47E-04 |
| cg15026277 | 17 | 41363789  | TMEM106A     | 0.27  | 3.89E-06 | 9.47E-04 |
| cg09022993 | 4  | 52917875  | SPATA18      | 0.30  | 3.92E-06 | 9.53E-04 |
| cg01701415 | 10 | 74870311  | NUDT13       | 0.31  | 3.93E-06 | 9.54E-04 |
| cg15837109 | 15 | 32964208  | SCG5         | -0.24 | 3.95E-06 | 9.58E-04 |
| cg13884376 | 9  | 130505349 | SH2D3C       | 0.25  | 3.96E-06 | 9.59E-04 |
| cg03536885 | 7  | 27163820  | HOXA3        | 0.25  | 3.97E-06 | 9.61E-04 |
| cg16027403 | 1  | 247978791 | OR14A16      | -0.26 | 4.02E-06 | 9.71E-04 |
| cg18805066 | 7  | 27134259  | HOXA1        | 0.28  | 4.04E-06 | 9.74E-04 |
| cg04518342 | 5  | 131593106 | PDLIM4       | 0.35  | 4.05E-06 | 9.76E-04 |
| cg06635722 | 4  | 13532622  |              | 0.25  | 4.05E-06 | 9.76E-04 |
| cg10534720 | 10 | 102898675 |              | 0.21  | 4.06E-06 | 9.77E-04 |
| cg01689239 | 12 | 48592635  |              | 0.21  | 4.08E-06 | 9.80E-04 |
| cg07741162 | 5  | 122429966 | PRDM6        | 0.24  | 4.09E-06 | 9.80E-04 |

|            |    |           |              |       |          |          |
|------------|----|-----------|--------------|-------|----------|----------|
| cg02083234 | 3  | 62357769  | FEZF2        | 0.24  | 4.09E-06 | 9.80E-04 |
| cg16701896 | 7  | 27233411  |              | 0.28  | 4.09E-06 | 9.80E-04 |
| cg19951244 | 5  | 172672766 |              | 0.28  | 4.10E-06 | 9.81E-04 |
| cg26402660 | 7  | 27179268  |              | 0.29  | 4.10E-06 | 9.81E-04 |
| cg24361162 | 1  | 156358116 |              | 0.26  | 4.11E-06 | 9.82E-04 |
| cg11241627 | 7  | 19185165  | FERD3L       | 0.27  | 4.12E-06 | 9.83E-04 |
| cg02621030 | 16 | 29151700  |              | -0.24 | 4.12E-06 | 9.83E-04 |
| cg14888916 | 8  | 99951420  |              | 0.25  | 4.13E-06 | 9.84E-04 |
| cg06665391 | 20 | 39312290  |              | 0.30  | 4.13E-06 | 9.84E-04 |
| cg05950877 | 19 | 11784647  | ZNF833       | 0.28  | 4.14E-06 | 9.84E-04 |
| cg03795847 | 3  | 44596512  | ZNF167       | 0.23  | 4.14E-06 | 9.84E-04 |
| cg24019564 | 1  | 25257566  | RUNX3        | 0.25  | 4.14E-06 | 9.84E-04 |
| cg03776662 | 5  | 122430677 | PRDM6        | 0.24  | 4.17E-06 | 9.91E-04 |
| cg11101117 | 10 | 102997865 | FLJ41350     | 0.25  | 4.19E-06 | 9.95E-04 |
| cg01557798 | 1  | 228400628 | OBSCN        | 0.24  | 4.19E-06 | 9.95E-04 |
| cg00507738 | 12 | 49658678  | TUBA1C       | 0.30  | 4.20E-06 | 9.95E-04 |
| cg11355215 | 20 | 10198044  | SNAP25       | 0.32  | 4.21E-06 | 9.96E-04 |
| cg25741215 | 2  | 63287082  |              | 0.32  | 4.21E-06 | 9.96E-04 |
| cg24865270 | 6  | 10422447  |              | 0.27  | 4.21E-06 | 9.96E-04 |
| cg22704068 | 1  | 3689178   | LOC388588    | 0.26  | 4.22E-06 | 9.96E-04 |
| cg02624701 | 19 | 49937176  | SLC17A7      | 0.26  | 4.25E-06 | 1.00E-03 |
| cg05120944 | 12 | 54090254  |              | 0.24  | 4.27E-06 | 1.00E-03 |
| cg06834912 | 16 | 86547203  | FOXF1        | 0.26  | 4.29E-06 | 1.01E-03 |
| cg01393632 | 12 | 103344685 |              | 0.32  | 4.31E-06 | 1.01E-03 |
| cg17837894 | 7  | 27531429  |              | -0.22 | 4.32E-06 | 1.01E-03 |
| cg24542751 | 17 | 43339589  | LOC100133991 | 0.29  | 4.33E-06 | 1.01E-03 |
| cg11248896 | 2  | 177003747 |              | 0.22  | 4.34E-06 | 1.01E-03 |
| cg23248357 | 5  | 2755376   | C5orf38      | 0.25  | 4.34E-06 | 1.01E-03 |
| cg02776659 | 21 | 47717406  | C21orf57     | 0.27  | 4.35E-06 | 1.01E-03 |
| cg02356551 | 8  | 53013726  |              | 0.31  | 4.38E-06 | 1.02E-03 |
| cg00856041 | 6  | 27798455  |              | 0.34  | 4.38E-06 | 1.02E-03 |
| cg09469610 | 15 | 68113110  |              | 0.23  | 4.40E-06 | 1.02E-03 |
| cg12118269 | 10 | 102893980 | TLX1         | 0.32  | 4.43E-06 | 1.03E-03 |
| cg07211140 | 11 | 32455025  | WT1          | 0.30  | 4.45E-06 | 1.03E-03 |
| cg25597138 | 6  | 28511790  |              | 0.21  | 4.45E-06 | 1.03E-03 |
| cg27110886 | 10 | 99734912  | CRTAC1       | 0.24  | 4.47E-06 | 1.03E-03 |
| cg11472521 | 17 | 48050512  | DLX4         | 0.23  | 4.48E-06 | 1.03E-03 |
| cg27343836 | 16 | 86549678  |              | 0.23  | 4.51E-06 | 1.04E-03 |
| cg22477343 | 20 | 39312069  |              | 0.29  | 4.51E-06 | 1.04E-03 |
| cg13705391 | 6  | 32118441  | PRRT1        | 0.23  | 4.53E-06 | 1.04E-03 |
| cg04927889 | 3  | 62360464  | FEZF2        | 0.27  | 4.55E-06 | 1.04E-03 |
| cg19227130 | 3  | 62359392  | FEZF2        | 0.31  | 4.55E-06 | 1.04E-03 |
| cg00399175 | 2  | 26395448  | FAM59B       | 0.23  | 4.56E-06 | 1.04E-03 |
| cg07436152 | 6  | 50819236  |              | 0.22  | 4.57E-06 | 1.05E-03 |
| cg27544000 | 1  | 17034075  | ESPNP        | 0.23  | 4.58E-06 | 1.05E-03 |
| cg02627455 | 7  | 27157818  | HOXA3        | 0.26  | 4.61E-06 | 1.05E-03 |
| cg20100910 | 10 | 102475429 |              | 0.31  | 4.62E-06 | 1.05E-03 |
| cg19675142 | 1  | 116107015 |              | 0.26  | 4.64E-06 | 1.06E-03 |
| cg17395064 | 12 | 104609476 | TXNRD1       | 0.31  | 4.65E-06 | 1.06E-03 |
| cg09978906 | 14 | 74345331  | PTGR2        | -0.21 | 4.66E-06 | 1.06E-03 |
| cg12629515 | 6  | 27859811  | HIST1H3J     | 0.27  | 4.66E-06 | 1.06E-03 |
| cg01429039 | 4  | 52918065  | SPATA18      | 0.29  | 4.68E-06 | 1.06E-03 |
| cg18803655 | 12 | 12849748  | GPR19        | 0.34  | 4.68E-06 | 1.06E-03 |
| cg12765028 | 4  | 13526659  |              | 0.21  | 4.69E-06 | 1.06E-03 |
| cg26168907 | 6  | 32977223  | HLA-DOA      | 0.20  | 4.70E-06 | 1.06E-03 |
| cg14471364 | 2  | 157177936 |              | 0.27  | 4.71E-06 | 1.06E-03 |
| cg00682734 | 20 | 55200973  |              | 0.26  | 4.72E-06 | 1.06E-03 |
| cg11796095 | 21 | 44486452  | CBS          | -0.29 | 4.76E-06 | 1.07E-03 |
| cg16966315 | 7  | 149112318 |              | 0.28  | 4.76E-06 | 1.07E-03 |
| cg23221090 | 10 | 64892741  | NRBF2        | -0.21 | 4.77E-06 | 1.07E-03 |
| cg10128511 | 3  | 98452940  | ST3GAL6      | 0.27  | 4.79E-06 | 1.07E-03 |
| cg13029423 | 16 | 86549276  |              | 0.27  | 4.79E-06 | 1.07E-03 |
| cg14483142 | 3  | 8811758   | OXTR         | -0.22 | 4.80E-06 | 1.07E-03 |
| cg25386234 | 1  | 119542159 |              | 0.24  | 4.81E-06 | 1.07E-03 |
| cg00817501 | 4  | 138440719 | PCDH18       | -0.23 | 4.81E-06 | 1.07E-03 |
| cg02732252 | 16 | 3068014   | CLDN6        | 0.27  | 4.82E-06 | 1.07E-03 |

|            |    |           |              |       |          |          |
|------------|----|-----------|--------------|-------|----------|----------|
| cg21038785 | 15 | 53087068  |              | 0.28  | 4.82E-06 | 1.07E-03 |
| cg08815081 | 10 | 28035731  | MKX          | 0.28  | 4.84E-06 | 1.08E-03 |
| cg27641141 | 10 | 43892910  | HNRNPF       | 0.22  | 4.84E-06 | 1.08E-03 |
| cg25236050 | 12 | 55794783  | OR6C65       | -0.20 | 4.86E-06 | 1.08E-03 |
| cg24217984 | 15 | 93633278  | RGMA         | 0.26  | 4.90E-06 | 1.09E-03 |
| cg04365224 | 3  | 72788183  |              | 0.28  | 4.91E-06 | 1.09E-03 |
| cg24144440 | 1  | 119526882 | TBX15        | 0.26  | 4.91E-06 | 1.09E-03 |
| cg06625730 | 20 | 18456304  | POLR3F       | -0.23 | 4.93E-06 | 1.09E-03 |
| cg08465346 | 12 | 54441458  | HOXC4        | 0.29  | 4.93E-06 | 1.09E-03 |
| cg19837259 | 13 | 28527437  |              | 0.23  | 4.93E-06 | 1.09E-03 |
| cg22474464 | 20 | 21492914  | NKX2-2       | 0.32  | 4.94E-06 | 1.09E-03 |
| cg19360852 | 12 | 12848977  | GPR19        | 0.25  | 4.95E-06 | 1.09E-03 |
| cg14979301 | 5  | 42994123  |              | 0.27  | 4.97E-06 | 1.09E-03 |
| cg26742995 | 17 | 43339594  | LOC100133991 | 0.26  | 4.98E-06 | 1.09E-03 |
| cg27072012 | 16 | 3078339   | CCDC64B      | 0.22  | 5.01E-06 | 1.10E-03 |
| cg19132462 | 11 | 10476608  | AMPD3        | 0.24  | 5.01E-06 | 1.10E-03 |
| cg09680447 | 4  | 1037615   |              | -0.22 | 5.02E-06 | 1.10E-03 |
| cg00218620 | 2  | 219866460 | MIR375       | 0.26  | 5.03E-06 | 1.10E-03 |
| cg00192136 | 11 | 20178496  | DBX1         | 0.31  | 5.05E-06 | 1.10E-03 |
| cg10784928 | 19 | 19971578  |              | 0.23  | 5.06E-06 | 1.10E-03 |
| cg09989644 | 1  | 156358119 |              | 0.21  | 5.06E-06 | 1.10E-03 |
| cg16551732 | 4  | 169799087 | PALLD        | 0.28  | 5.07E-06 | 1.11E-03 |
| cg13001868 | 17 | 43339223  | C17orf46     | 0.31  | 5.07E-06 | 1.11E-03 |
| cg15263666 | 3  | 27756317  |              | 0.21  | 5.08E-06 | 1.11E-03 |
| cg14906455 | 17 | 2628088   |              | 0.29  | 5.09E-06 | 1.11E-03 |
| cg04865531 | 22 | 51159147  | SHANK3       | 0.27  | 5.09E-06 | 1.11E-03 |
| cg12506930 | 19 | 58220718  | ZNF154       | 0.30  | 5.10E-06 | 1.11E-03 |
| cg00073837 | 2  | 223177008 |              | 0.25  | 5.10E-06 | 1.11E-03 |
| cg03522107 | 1  | 16553329  |              | 0.22  | 5.11E-06 | 1.11E-03 |
| cg00007466 | 19 | 7585086   | ZNF358       | -0.24 | 5.11E-06 | 1.11E-03 |
| cg08871722 | 17 | 21495791  |              | -0.21 | 5.12E-06 | 1.11E-03 |
| cg21355828 | 7  | 149389814 |              | 0.24  | 5.13E-06 | 1.11E-03 |
| cg00778084 | 1  | 173681595 |              | -0.23 | 5.14E-06 | 1.11E-03 |
| cg14377594 | 9  | 1051505   | DMRT2        | 0.23  | 5.14E-06 | 1.11E-03 |
| cg23054426 | 7  | 19185267  | FERD3L       | 0.24  | 5.14E-06 | 1.11E-03 |
| cg20272962 | 17 | 56326765  | LPO          | 0.24  | 5.15E-06 | 1.11E-03 |
| cg03234186 | 19 | 58220657  | ZNF154       | 0.31  | 5.16E-06 | 1.11E-03 |
| cg22798849 | 7  | 27155234  | HOXA3        | 0.21  | 5.21E-06 | 1.12E-03 |
| cg00339682 | 4  | 13531163  |              | 0.30  | 5.23E-06 | 1.12E-03 |
| cg06723863 | 16 | 68270129  | ESRP2        | 0.30  | 5.25E-06 | 1.13E-03 |
| cg07280807 | 14 | 70317239  |              | 0.24  | 5.27E-06 | 1.13E-03 |
| cg05583831 | 3  | 27772705  |              | 0.30  | 5.28E-06 | 1.13E-03 |
| cg19923650 | 5  | 172659730 | NKX2-5       | 0.32  | 5.32E-06 | 1.14E-03 |
| cg21647227 | 1  | 119527111 | TBX15        | 0.27  | 5.32E-06 | 1.14E-03 |
| cg07066898 | 19 | 17717094  | UNC13A       | 0.30  | 5.33E-06 | 1.14E-03 |
| cg11367354 | 7  | 96651983  | DLX5         | 0.24  | 5.34E-06 | 1.14E-03 |
| cg10397527 | 6  | 32977217  | HLA-DOA      | 0.22  | 5.34E-06 | 1.14E-03 |
| cg04965987 | 21 | 38378539  | DSCR6        | 0.25  | 5.36E-06 | 1.14E-03 |
| cg05886811 | 6  | 17280740  | RBM24        | 0.23  | 5.36E-06 | 1.14E-03 |
| cg06838283 | 5  | 111090142 | C5orf13      | 0.24  | 5.36E-06 | 1.14E-03 |
| cg11594833 | 12 | 54444985  | HOXC4        | 0.29  | 5.38E-06 | 1.15E-03 |
| cg07447742 | 13 | 49793170  | MLNR         | 0.21  | 5.38E-06 | 1.15E-03 |
| cg22893494 | 3  | 140952551 | ACPL2        | 0.21  | 5.39E-06 | 1.15E-03 |
| cg18468354 | 14 | 36993517  |              | 0.23  | 5.40E-06 | 1.15E-03 |
| cg08860190 | 19 | 6719342   | C3           | -0.26 | 5.40E-06 | 1.15E-03 |
| cg11706983 | 7  | 27233454  |              | 0.30  | 5.42E-06 | 1.15E-03 |
| cg22730140 | 5  | 172660996 | NKX2-5       | 0.26  | 5.44E-06 | 1.15E-03 |
| cg08247376 | 17 | 43339358  | C17orf46     | 0.26  | 5.44E-06 | 1.15E-03 |
| cg03740978 | 18 | 24127875  | KCTD1        | 0.29  | 5.44E-06 | 1.15E-03 |
| cg17593584 | 2  | 220025719 | NHEJ1        | 0.26  | 5.44E-06 | 1.15E-03 |
| cg05160381 | 7  | 156740259 |              | -0.22 | 5.45E-06 | 1.15E-03 |
| cg23217622 | 1  | 156405438 |              | 0.28  | 5.45E-06 | 1.15E-03 |
| cg15580417 | 1  | 160053947 | KCNJ9        | 0.24  | 5.45E-06 | 1.15E-03 |
| cg07153665 | 16 | 66613206  | CMTM2        | 0.25  | 5.45E-06 | 1.15E-03 |
| cg11760198 | 18 | 34854936  | BRUNOL4      | 0.23  | 5.46E-06 | 1.15E-03 |
| cg10624054 | 12 | 53297547  | KRT8         | 0.31  | 5.46E-06 | 1.15E-03 |

|            |    |           |              |       |          |          |
|------------|----|-----------|--------------|-------|----------|----------|
| cg21177821 | 14 | 61121712  |              | 0.21  | 5.48E-06 | 1.15E-03 |
| cg01959416 | 7  | 150020818 | ACTR3C       | 0.20  | 5.55E-06 | 1.17E-03 |
| cg01989621 | 7  | 57472709  |              | -0.24 | 5.56E-06 | 1.17E-03 |
| cg00138474 | 6  | 30484334  |              | 0.27  | 5.56E-06 | 1.17E-03 |
| cg18646521 | 2  | 111875858 |              | 0.24  | 5.59E-06 | 1.17E-03 |
| cg21606036 | 5  | 78985900  | CMYA5        | 0.21  | 5.62E-06 | 1.18E-03 |
| cg04539503 | 19 | 34311327  |              | 0.30  | 5.63E-06 | 1.18E-03 |
| cg18898125 | 8  | 24770381  | NEFM         | 0.30  | 5.67E-06 | 1.18E-03 |
| cg08932256 | 12 | 116008258 |              | 0.23  | 5.68E-06 | 1.18E-03 |
| cg22173131 | 11 | 75480171  | DGAT2        | 0.23  | 5.68E-06 | 1.18E-03 |
| cg08589354 | 16 | 86548895  |              | 0.27  | 5.69E-06 | 1.18E-03 |
| cg12069276 | 11 | 10476242  | AMPD3        | 0.23  | 5.70E-06 | 1.19E-03 |
| cg27615366 | 5  | 131592974 | PDLIM4       | 0.20  | 5.72E-06 | 1.19E-03 |
| cg15540602 | 14 | 61122911  |              | 0.24  | 5.74E-06 | 1.19E-03 |
| cg08489883 | 20 | 21498294  |              | 0.23  | 5.78E-06 | 1.20E-03 |
| cg27177554 | 10 | 16562102  | C1QL3        | 0.31  | 5.79E-06 | 1.20E-03 |
| cg00193963 | 7  | 29923832  | WIPF3        | 0.25  | 5.83E-06 | 1.21E-03 |
| cg03490331 | 5  | 172672817 |              | 0.26  | 5.84E-06 | 1.21E-03 |
| cg05329352 | 10 | 112838983 | ADRA2A       | 0.21  | 5.86E-06 | 1.21E-03 |
| cg07769790 | 15 | 83317281  | CPEB1        | 0.24  | 5.87E-06 | 1.21E-03 |
| cg14069333 | 2  | 16443899  |              | 0.23  | 5.88E-06 | 1.21E-03 |
| cg05000994 | 7  | 27131807  |              | 0.28  | 5.90E-06 | 1.21E-03 |
| cg21669441 | 15 | 83349864  | AP3B2        | 0.24  | 5.90E-06 | 1.21E-03 |
| cg12477370 | 6  | 45391852  | RUNX2        | 0.25  | 5.91E-06 | 1.21E-03 |
| cg12305431 | 7  | 27157855  | HOXA3        | 0.26  | 5.93E-06 | 1.22E-03 |
| cg10858480 | 14 | 61122774  |              | 0.23  | 5.95E-06 | 1.22E-03 |
| cg02931225 | 4  | 96446177  | UNC5C        | 0.23  | 5.95E-06 | 1.22E-03 |
| cg01627847 | 17 | 43339512  | LOC100133991 | 0.27  | 5.95E-06 | 1.22E-03 |
| cg16282892 | 3  | 193987757 |              | -0.22 | 5.96E-06 | 1.22E-03 |
| cg01480180 | 7  | 90896329  | FZD1         | 0.28  | 5.97E-06 | 1.22E-03 |
| cg07659054 | 7  | 27134225  | HOXA1        | 0.26  | 6.02E-06 | 1.23E-03 |
| cg02345961 | 18 | 34854574  | BRUNOL4      | 0.28  | 6.02E-06 | 1.23E-03 |
| cg00814328 | 19 | 22992509  |              | -0.21 | 6.05E-06 | 1.23E-03 |
| cg17455088 | 2  | 206551466 | NRP2         | 0.27  | 6.06E-06 | 1.23E-03 |
| cg23954268 | 5  | 172672454 |              | 0.30  | 6.06E-06 | 1.23E-03 |
| cg25147604 | 6  | 7540971   | DSP          | 0.25  | 6.07E-06 | 1.23E-03 |
| cg18857759 | 1  | 248110661 | OR2L8        | -0.25 | 6.07E-06 | 1.23E-03 |
| cg08065408 | 6  | 29520774  |              | 0.24  | 6.08E-06 | 1.23E-03 |
| cg22120714 | 17 | 40332420  | KCNH4        | 0.24  | 6.08E-06 | 1.23E-03 |
| cg12285605 | 15 | 68785674  |              | -0.21 | 6.11E-06 | 1.24E-03 |
| cg21488066 | 6  | 28367898  | ZSCAN12      | 0.25  | 6.11E-06 | 1.24E-03 |
| cg22893248 | 7  | 150020751 | ACTR3C       | 0.24  | 6.12E-06 | 1.24E-03 |
| cg13412545 | 5  | 172175765 |              | 0.24  | 6.14E-06 | 1.24E-03 |
| cg07727358 | 4  | 1008738   | FGFRL1       | -0.21 | 6.15E-06 | 1.24E-03 |
| cg05901357 | 2  | 27529325  | TRIM54       | 0.24  | 6.16E-06 | 1.24E-03 |
| cg25828185 | 12 | 54455656  | FLJ12825     | 0.20  | 6.20E-06 | 1.25E-03 |
| cg26856578 | 13 | 79360870  |              | -0.25 | 6.21E-06 | 1.25E-03 |
| cg22368476 | 11 | 123814163 | OR6T1        | -0.25 | 6.23E-06 | 1.25E-03 |
| cg04297067 | 16 | 86550450  |              | 0.27  | 6.24E-06 | 1.25E-03 |
| cg18117600 | 15 | 53097649  |              | 0.23  | 6.25E-06 | 1.25E-03 |
| cg03040165 | 2  | 131185700 |              | 0.25  | 6.26E-06 | 1.25E-03 |
| cg22466678 | 12 | 89749033  |              | 0.24  | 6.29E-06 | 1.26E-03 |
| cg04552470 | 1  | 20669792  | VWA5B1       | 0.28  | 6.30E-06 | 1.26E-03 |
| cg17636752 | 6  | 45391973  | RUNX2        | 0.21  | 6.31E-06 | 1.26E-03 |
| cg06388730 | 7  | 35297699  |              | 0.29  | 6.33E-06 | 1.26E-03 |
| cg25391162 | 9  | 118091    | FOXD4        | 0.21  | 6.33E-06 | 1.26E-03 |
| cg23442112 | 11 | 5663329   | TRIM34       | -0.26 | 6.33E-06 | 1.26E-03 |
| cg07851675 | 5  | 2755540   |              | 0.28  | 6.38E-06 | 1.27E-03 |
| cg24563094 | 2  | 26395458  | FAM59B       | 0.26  | 6.38E-06 | 1.27E-03 |
| cg09042448 | 8  | 23260443  | LOXL2        | 0.27  | 6.39E-06 | 1.27E-03 |
| cg15304464 | 11 | 132830180 | OPCML        | -0.22 | 6.40E-06 | 1.27E-03 |
| cg08144172 | 1  | 41849203  |              | -0.22 | 6.40E-06 | 1.27E-03 |
| cg03838635 | 17 | 2628322   |              | 0.27  | 6.41E-06 | 1.27E-03 |
| cg26532627 | 17 | 43339744  | LOC100133991 | 0.22  | 6.42E-06 | 1.27E-03 |
| cg21951797 | 6  | 32026605  | TNXB         | -0.23 | 6.42E-06 | 1.27E-03 |
| cg09019936 | 2  | 162283434 |              | 0.31  | 6.44E-06 | 1.27E-03 |

|            |    |           |           |       |          |          |
|------------|----|-----------|-----------|-------|----------|----------|
| cg09247506 | 22 | 24820655  |           | 0.26  | 6.44E-06 | 1.27E-03 |
| cg23398318 | 14 | 99664135  | BCL11B    | -0.25 | 6.47E-06 | 1.27E-03 |
| cg04230699 | 12 | 12849443  | GPR19     | 0.33  | 6.48E-06 | 1.28E-03 |
| cg04874562 | 11 | 5462540   | OR5111    | -0.21 | 6.49E-06 | 1.28E-03 |
| cg24968786 | 11 | 66360800  | CCDC87    | 0.23  | 6.49E-06 | 1.28E-03 |
| cg07550362 | 7  | 97361201  | TAC1      | 0.28  | 6.49E-06 | 1.28E-03 |
| cg04057288 | 9  | 130504189 | SH2D3C    | 0.21  | 6.51E-06 | 1.28E-03 |
| cg02152475 | 9  | 37029364  | PAX5      | 0.27  | 6.51E-06 | 1.28E-03 |
| cg21533331 | 19 | 31848049  |           | 0.31  | 6.53E-06 | 1.28E-03 |
| cg12912293 | 1  | 150849805 | ARNT      | -0.24 | 6.54E-06 | 1.28E-03 |
| cg00288806 | 7  | 8476521   | NXP1      | 0.26  | 6.54E-06 | 1.28E-03 |
| cg17566936 | 4  | 48271107  | TEC       | 0.24  | 6.55E-06 | 1.28E-03 |
| cg09701582 | 2  | 177017797 | HOXD4     | 0.25  | 6.57E-06 | 1.28E-03 |
| cg10013501 | 1  | 25257813  | RUNX3     | 0.25  | 6.57E-06 | 1.28E-03 |
| cg21275838 | 15 | 59608124  | MYO1E     | -0.23 | 6.61E-06 | 1.29E-03 |
| cg10904986 | 8  | 145555806 | SCRT1     | 0.23  | 6.65E-06 | 1.29E-03 |
| cg09339763 | 4  | 174452612 | NBLA00301 | 0.31  | 6.65E-06 | 1.29E-03 |
| cg13600716 | 12 | 10223804  | CLEC1A    | -0.27 | 6.67E-06 | 1.29E-03 |
| cg16823535 | 13 | 100611510 |           | 0.29  | 6.68E-06 | 1.29E-03 |
| cg01497613 | 17 | 48041301  |           | 0.28  | 6.69E-06 | 1.29E-03 |
| cg01414185 | 2  | 177017449 | HOXD4     | 0.30  | 6.69E-06 | 1.29E-03 |
| cg02439266 | 7  | 27150042  | HOXA3     | 0.25  | 6.69E-06 | 1.29E-03 |
| cg23748923 | 17 | 2628248   |           | 0.30  | 6.71E-06 | 1.29E-03 |
| cg05353884 | 6  | 26226203  |           | 0.31  | 6.72E-06 | 1.30E-03 |
| cg09389280 | 3  | 170141005 | CLDN11    | -0.20 | 6.73E-06 | 1.30E-03 |
| cg02047547 | 16 | 19126242  | ITPR1L2   | 0.25  | 6.74E-06 | 1.30E-03 |
| cg04422256 | 10 | 88123169  | GRID1     | 0.25  | 6.78E-06 | 1.30E-03 |
| cg19855470 | 22 | 40060836  | CACNA1I   | 0.21  | 6.81E-06 | 1.31E-03 |
| cg24426691 | 13 | 96204669  | CLDN10    | 0.28  | 6.82E-06 | 1.31E-03 |
| cg04165720 | 19 | 7677604   | KIAA1543  | -0.20 | 6.82E-06 | 1.31E-03 |
| cg25774643 | 11 | 627175    | SCT       | 0.33  | 6.83E-06 | 1.31E-03 |
| cg04282694 | 6  | 5996412   |           | 0.27  | 6.84E-06 | 1.31E-03 |
| cg07849581 | 4  | 48272077  | TEC       | 0.29  | 6.85E-06 | 1.31E-03 |
| cg11896633 | 8  | 144816335 | FAM83H    | 0.24  | 6.86E-06 | 1.31E-03 |
| cg10526374 | 11 | 2292525   | ASCL2     | 0.27  | 6.88E-06 | 1.31E-03 |
| cg23331981 | 10 | 7574780   |           | -0.26 | 6.91E-06 | 1.32E-03 |
| cg26275431 | 5  | 140773122 | PCDHGA4   | 0.22  | 6.93E-06 | 1.32E-03 |
| cg24049888 | 11 | 111250129 | POU2AF1   | -0.21 | 6.93E-06 | 1.32E-03 |
| cg20732304 | 13 | 113752657 | MCF2L     | 0.23  | 6.94E-06 | 1.32E-03 |
| cg05033952 | 16 | 34255535  |           | -0.25 | 6.95E-06 | 1.32E-03 |
| cg18182148 | 1  | 92952533  | GFI1      | 0.25  | 7.02E-06 | 1.33E-03 |
| cg18664514 | 2  | 219851181 | FEV       | 0.22  | 7.03E-06 | 1.33E-03 |
| cg09997546 | 11 | 8931473   | C11orf17  | 0.22  | 7.03E-06 | 1.33E-03 |
| cg19548479 | 17 | 41363737  | TMEM106A  | 0.25  | 7.04E-06 | 1.33E-03 |
| cg24360871 | 7  | 27163929  | HOXA3     | 0.28  | 7.05E-06 | 1.33E-03 |
| cg06842116 | 22 | 17182794  |           | -0.23 | 7.09E-06 | 1.34E-03 |
| cg25616869 | 3  | 48443867  |           | -0.22 | 7.10E-06 | 1.34E-03 |
| cg16860712 | 19 | 48244461  | EHD2      | -0.23 | 7.11E-06 | 1.34E-03 |
| cg05764839 | 6  | 32118298  | PRRT1     | 0.25  | 7.11E-06 | 1.34E-03 |
| cg04598224 | 19 | 11784514  | ZNF833    | 0.24  | 7.14E-06 | 1.34E-03 |
| cg05898591 | 5  | 174805715 |           | -0.26 | 7.17E-06 | 1.35E-03 |
| cg10958002 | 3  | 12200324  | TIMP4     | 0.23  | 7.20E-06 | 1.35E-03 |
| cg05231837 | 7  | 156411247 |           | 0.22  | 7.20E-06 | 1.35E-03 |
| cg24138857 | 6  | 32055079  | TNXB      | 0.24  | 7.21E-06 | 1.35E-03 |
| cg23590202 | 7  | 27188770  | HOXA6     | -0.23 | 7.22E-06 | 1.36E-03 |
| cg03400421 | 10 | 23460371  |           | 0.26  | 7.25E-06 | 1.36E-03 |
| cg21770322 | 7  | 97807741  | LMTK2     | -0.24 | 7.29E-06 | 1.36E-03 |
| cg23618344 | 12 | 54423428  | HOXC4     | 0.26  | 7.29E-06 | 1.36E-03 |
| cg01239735 | 12 | 214224    | IQSEC3    | -0.22 | 7.30E-06 | 1.36E-03 |
| cg13053653 | 2  | 177037631 | HOXD3     | 0.23  | 7.35E-06 | 1.37E-03 |
| cg17497608 | 7  | 90896701  | FZD1      | 0.29  | 7.37E-06 | 1.37E-03 |
| cg09481121 | 5  | 78985425  | CMYA5     | 0.24  | 7.40E-06 | 1.38E-03 |
| cg04873577 | 7  | 121006948 | FAM3C     | -0.23 | 7.41E-06 | 1.38E-03 |
| cg02750098 | 5  | 172656021 |           | 0.25  | 7.42E-06 | 1.38E-03 |
| cg12946214 | 19 | 41882234  | TMEM91    | 0.22  | 7.48E-06 | 1.39E-03 |
| cg23164183 | 5  | 2754894   | C5orf38   | 0.25  | 7.51E-06 | 1.39E-03 |

|            |    |           |              |       |          |          |
|------------|----|-----------|--------------|-------|----------|----------|
| cg11278506 | 3  | 72787955  |              | 0.27  | 7.52E-06 | 1.39E-03 |
| cg13031251 | 5  | 77268734  |              | 0.29  | 7.54E-06 | 1.39E-03 |
| cg00705280 | 2  | 219866493 | MIR375       | 0.29  | 7.56E-06 | 1.40E-03 |
| cg20125920 | 10 | 21804624  | C10orf140    | 0.23  | 7.57E-06 | 1.40E-03 |
| cg27114640 | 1  | 18437320  | IGSF21       | 0.24  | 7.62E-06 | 1.41E-03 |
| cg20675389 | 3  | 181421951 | SOX2OT       | 0.24  | 7.63E-06 | 1.41E-03 |
| cg20173059 | 11 | 113185285 | TTC12        | 0.30  | 7.63E-06 | 1.41E-03 |
| cg26411441 | 20 | 3733040   | HSPA12B      | 0.25  | 7.64E-06 | 1.41E-03 |
| cg10400652 | 19 | 46996516  | PNMAL2       | 0.25  | 7.68E-06 | 1.41E-03 |
| cg19521832 | 21 | 35831996  | KCNE1        | 0.27  | 7.72E-06 | 1.42E-03 |
| cg21836370 | 12 | 85667451  |              | 0.25  | 7.73E-06 | 1.42E-03 |
| cg18851100 | 22 | 51158550  | SHANK3       | 0.26  | 7.74E-06 | 1.42E-03 |
| cg02928699 | 11 | 88241946  | GRM5         | 0.24  | 7.78E-06 | 1.42E-03 |
| cg19058685 | 12 | 54440806  | HOXC4        | 0.23  | 7.79E-06 | 1.42E-03 |
| cg00282510 | 9  | 100611516 |              | 0.29  | 7.80E-06 | 1.42E-03 |
| cg10804678 | 3  | 72788309  |              | 0.26  | 7.80E-06 | 1.42E-03 |
| cg09357935 | 11 | 20626264  | SLC6A5       | 0.27  | 7.81E-06 | 1.42E-03 |
| cg13080379 | 1  | 119527156 | TBX15        | 0.25  | 7.81E-06 | 1.42E-03 |
| cg12646649 | 10 | 102987257 | LBX1         | 0.31  | 7.82E-06 | 1.43E-03 |
| cg21615583 | 2  | 219866512 | MIR375       | 0.31  | 7.83E-06 | 1.43E-03 |
| cg22400166 | 14 | 29242040  | C14orf23     | 0.21  | 7.89E-06 | 1.44E-03 |
| cg07799386 | 5  | 122430821 | PRDM6        | 0.27  | 7.91E-06 | 1.44E-03 |
| cg18685243 | 12 | 58015069  | SLC26A10     | 0.26  | 7.91E-06 | 1.44E-03 |
| cg01909921 | 9  | 135854246 | GFI1B        | 0.24  | 7.96E-06 | 1.45E-03 |
| cg08462924 | 1  | 41848221  |              | -0.26 | 7.97E-06 | 1.45E-03 |
| cg18010131 | 11 | 10476620  | AMPD3        | 0.22  | 7.99E-06 | 1.45E-03 |
| cg22814884 | 11 | 66360803  | CCDC87       | 0.23  | 8.05E-06 | 1.46E-03 |
| cg02346713 | 15 | 51387736  | TNFAIP8L3    | 0.21  | 8.06E-06 | 1.46E-03 |
| cg15746719 | 9  | 90113813  | DAPK1        | 0.25  | 8.07E-06 | 1.46E-03 |
| cg16202470 | 17 | 8907213   |              | 0.25  | 8.09E-06 | 1.46E-03 |
| cg06368558 | 1  | 26735884  | LIN28        | 0.23  | 8.09E-06 | 1.46E-03 |
| cg15323626 | 15 | 35274878  | ZNF770       | -0.21 | 8.10E-06 | 1.46E-03 |
| cg22616881 | 7  | 96642096  | DLX6AS       | 0.29  | 8.10E-06 | 1.46E-03 |
| cg16627829 | 19 | 36394482  | HCST         | 0.21  | 8.12E-06 | 1.46E-03 |
| cg18450930 | 11 | 5444223   | OR51Q1       | -0.26 | 8.20E-06 | 1.47E-03 |
| cg02242681 | 2  | 111876361 |              | 0.23  | 8.21E-06 | 1.47E-03 |
| cg15391433 | 7  | 98547209  | TRRAP        | -0.21 | 8.22E-06 | 1.48E-03 |
| cg10323725 | 1  | 156405495 |              | 0.22  | 8.22E-06 | 1.48E-03 |
| cg18343474 | 1  | 229566908 |              | 0.25  | 8.23E-06 | 1.48E-03 |
| cg22378919 | 1  | 119522188 | TBX15        | 0.28  | 8.23E-06 | 1.48E-03 |
| cg22584618 | 7  | 35298212  |              | 0.25  | 8.34E-06 | 1.49E-03 |
| cg05040232 | 3  | 194117403 | GP5          | 0.20  | 8.35E-06 | 1.49E-03 |
| cg00311984 | 8  | 145051668 | PLEC1        | 0.21  | 8.41E-06 | 1.50E-03 |
| cg10246081 | 12 | 49726893  | C1QL4        | 0.26  | 8.41E-06 | 1.50E-03 |
| cg03443455 | 2  | 171671795 | GAD1         | 0.22  | 8.42E-06 | 1.50E-03 |
| cg14431443 | 12 | 114846431 | TBX5         | 0.20  | 8.43E-06 | 1.50E-03 |
| cg25551362 | 22 | 36894069  | FOXRED2      | 0.21  | 8.46E-06 | 1.51E-03 |
| cg20125091 | 1  | 92952641  | GFI1         | 0.21  | 8.46E-06 | 1.51E-03 |
| cg05697695 | 19 | 14584181  | PTGER1       | 0.22  | 8.47E-06 | 1.51E-03 |
| cg02051616 | 5  | 172661132 | NKX2-5       | 0.25  | 8.57E-06 | 1.52E-03 |
| cg07904475 | 4  | 151500931 | LRBA         | 0.27  | 8.57E-06 | 1.52E-03 |
| cg06732439 | 2  | 239140318 | LOC151174    | 0.28  | 8.58E-06 | 1.52E-03 |
| cg15526081 | 10 | 119310404 |              | 0.23  | 8.58E-06 | 1.52E-03 |
| cg14263391 | 17 | 37894014  | GRB7         | 0.30  | 8.58E-06 | 1.52E-03 |
| cg07333191 | 4  | 13526769  |              | 0.29  | 8.59E-06 | 1.52E-03 |
| cg23928165 | 19 | 46996713  | PNMAL2       | 0.29  | 8.64E-06 | 1.53E-03 |
| cg06359703 | 1  | 41847297  |              | -0.22 | 8.65E-06 | 1.53E-03 |
| cg15396367 | 9  | 139972779 | UAP1L1       | 0.23  | 8.68E-06 | 1.53E-03 |
| cg18755783 | 13 | 36919905  | SPG20        | 0.26  | 8.69E-06 | 1.53E-03 |
| cg00064261 | 1  | 229570057 | ACTA1        | 0.20  | 8.69E-06 | 1.53E-03 |
| cg07997493 | 17 | 37761947  | NEUROD2      | 0.32  | 8.74E-06 | 1.54E-03 |
| cg03048083 | 17 | 43339497  | LOC100133991 | 0.31  | 8.75E-06 | 1.54E-03 |
| cg26529911 | 4  | 166795773 | TLL1         | 0.29  | 8.78E-06 | 1.55E-03 |
| cg21186576 | 17 | 79466077  |              | -0.22 | 8.79E-06 | 1.55E-03 |
| cg12991125 | 2  | 160919431 | PLA2R1       | 0.28  | 8.86E-06 | 1.56E-03 |
| cg03308652 | 3  | 62354991  |              | 0.26  | 8.89E-06 | 1.56E-03 |

|            |    |           |           |       |          |          |
|------------|----|-----------|-----------|-------|----------|----------|
| cg12157438 | 10 | 94835255  | CYP26A1   | 0.22  | 8.89E-06 | 1.56E-03 |
| cg19264571 | 18 | 10454085  | APCDD1    | 0.21  | 8.94E-06 | 1.56E-03 |
| cg03159396 | 6  | 50808813  | TFAP2B    | 0.25  | 8.96E-06 | 1.57E-03 |
| cg09351315 | 17 | 77775823  |           | 0.25  | 8.97E-06 | 1.57E-03 |
| cg09636715 | 7  | 27217057  | HOXA10    | -0.26 | 8.99E-06 | 1.57E-03 |
| cg17206555 | 7  | 90227371  |           | 0.20  | 9.00E-06 | 1.57E-03 |
| cg26201952 | 12 | 54446253  | HOXC4     | 0.26  | 9.02E-06 | 1.57E-03 |
| cg16993043 | 1  | 200008026 | NR5A2     | 0.27  | 9.02E-06 | 1.57E-03 |
| cg27138204 | 12 | 54446100  | HOXC4     | 0.26  | 9.05E-06 | 1.58E-03 |
| cg00961932 | 1  | 110691765 | SLC6A17   | 0.22  | 9.05E-06 | 1.58E-03 |
| cg16194233 | 6  | 108440953 |           | 0.25  | 9.06E-06 | 1.58E-03 |
| cg04662532 | 12 | 54330125  |           | 0.21  | 9.08E-06 | 1.58E-03 |
| cg18161956 | 12 | 115112626 | TBX3      | 0.20  | 9.15E-06 | 1.59E-03 |
| cg16880946 | 7  | 27188465  | HOXA6     | -0.21 | 9.17E-06 | 1.59E-03 |
| cg14592399 | 4  | 41881933  |           | 0.24  | 9.19E-06 | 1.59E-03 |
| cg03701965 | 19 | 49889044  |           | -0.24 | 9.19E-06 | 1.59E-03 |
| cg25204094 | 9  | 100747473 | ANP32B    | 0.23  | 9.20E-06 | 1.59E-03 |
| cg13106389 | 1  | 25257626  | RUNX3     | 0.21  | 9.20E-06 | 1.59E-03 |
| cg18963509 | 17 | 40936150  | WNK4      | 0.23  | 9.22E-06 | 1.59E-03 |
| cg24436715 | 19 | 31848130  |           | 0.29  | 9.23E-06 | 1.59E-03 |
| cg21214521 | 7  | 569979    |           | -0.22 | 9.26E-06 | 1.60E-03 |
| cg24683414 | 1  | 92952581  | GFI1      | 0.27  | 9.28E-06 | 1.60E-03 |
| cg02993069 | 1  | 36786777  | C1orf113  | 0.21  | 9.30E-06 | 1.60E-03 |
| cg13917662 | 13 | 100548513 | CLYBL     | 0.30  | 9.31E-06 | 1.60E-03 |
| cg16413687 | 12 | 85672623  | ALX1      | 0.29  | 9.31E-06 | 1.60E-03 |
| cg17654091 | 19 | 41073716  | SPTBN4    | 0.30  | 9.32E-06 | 1.60E-03 |
| cg08299265 | 12 | 54354414  |           | 0.21  | 9.32E-06 | 1.60E-03 |
| cg13604794 | 17 | 48050338  | DLX4      | 0.20  | 9.33E-06 | 1.60E-03 |
| cg04827692 | 12 | 63543831  | AVPR1A    | 0.27  | 9.33E-06 | 1.60E-03 |
| cg13637654 | 10 | 103538719 |           | 0.24  | 9.33E-06 | 1.60E-03 |
| cg27425612 | 1  | 201368843 | LAD1      | 0.27  | 9.34E-06 | 1.60E-03 |
| cg18689332 | 12 | 114837666 | TBX5      | 0.29  | 9.35E-06 | 1.60E-03 |
| cg21336435 | 12 | 54398561  |           | 0.22  | 9.35E-06 | 1.60E-03 |
| cg02884181 | 5  | 158689508 | UBLCP1    | -0.25 | 9.39E-06 | 1.60E-03 |
| cg26562532 | 19 | 55864365  | COX6B2    | -0.23 | 9.39E-06 | 1.60E-03 |
| cg16019434 | 18 | 76736785  |           | 0.21  | 9.39E-06 | 1.60E-03 |
| cg03132556 | 12 | 54366760  | HOXC11    | 0.28  | 9.40E-06 | 1.60E-03 |
| cg01199603 | 12 | 65718113  | MSRB3     | -0.24 | 9.42E-06 | 1.61E-03 |
| cg13478928 | 1  | 75596724  | LHX8      | 0.30  | 9.42E-06 | 1.61E-03 |
| cg16300419 | 17 | 36666154  | ARHGAP23  | 0.21  | 9.45E-06 | 1.61E-03 |
| cg08071609 | 6  | 117086040 | FAM162B   | 0.29  | 9.46E-06 | 1.61E-03 |
| cg26444528 | 13 | 58207859  | PCDH17    | 0.31  | 9.47E-06 | 1.61E-03 |
| cg24079051 | 2  | 239140485 | LOC643387 | 0.20  | 9.50E-06 | 1.61E-03 |
| cg03793625 | 2  | 171669862 |           | 0.26  | 9.53E-06 | 1.62E-03 |
| cg22647546 | 2  | 26394518  | FAM59B    | 0.21  | 9.54E-06 | 1.62E-03 |
| cg27065003 | 5  | 122429449 | PRDM6     | 0.27  | 9.54E-06 | 1.62E-03 |
| cg11905488 | 12 | 10123604  | CLEC12A   | -0.24 | 9.58E-06 | 1.62E-03 |
| cg06866232 | 11 | 5020582   | OR51L1    | -0.21 | 9.59E-06 | 1.62E-03 |
| cg08252579 | 3  | 62359773  | FEZF2     | 0.29  | 9.60E-06 | 1.62E-03 |
| cg07598464 | 1  | 248366883 | OR2M3     | -0.22 | 9.65E-06 | 1.63E-03 |
| cg10893278 | 12 | 54377225  |           | 0.26  | 9.65E-06 | 1.63E-03 |
| cg12608247 | 2  | 239140369 | LOC643387 | 0.25  | 9.67E-06 | 1.63E-03 |
| cg09128751 | 21 | 44486205  | CBS       | -0.24 | 9.69E-06 | 1.63E-03 |
| cg13672200 | 12 | 54387530  |           | 0.25  | 9.75E-06 | 1.64E-03 |
| cg21216477 | 12 | 54440773  | HOXC4     | 0.28  | 9.76E-06 | 1.64E-03 |
| cg00741609 | 10 | 102893925 | TLX1      | 0.28  | 9.76E-06 | 1.64E-03 |
| cg11144641 | 5  | 134871566 | NEUROG1   | 0.25  | 9.76E-06 | 1.64E-03 |
| cg26386624 | 12 | 54366859  | HOXC11    | 0.24  | 9.77E-06 | 1.64E-03 |
| cg14486477 | 12 | 117256672 | RNFT2     | -0.21 | 9.77E-06 | 1.64E-03 |
| cg13891768 | 4  | 111536024 |           | 0.24  | 9.78E-06 | 1.64E-03 |
| cg02746187 | 15 | 53076188  | ONECUT1   | 0.28  | 9.79E-06 | 1.64E-03 |
| cg02264459 | 16 | 3199771   |           | 0.21  | 9.85E-06 | 1.64E-03 |
| cg09887220 | 13 | 95356202  |           | 0.25  | 9.86E-06 | 1.64E-03 |
| cg27324426 | 19 | 58220837  | ZNF154    | 0.29  | 9.86E-06 | 1.64E-03 |
| cg11685510 | 1  | 113286397 |           | 0.23  | 9.87E-06 | 1.64E-03 |
| cg24360747 | 11 | 129230721 |           | -0.24 | 9.93E-06 | 1.65E-03 |



|            |    |           |          |       |          |          |
|------------|----|-----------|----------|-------|----------|----------|
| cg07777790 | 1  | 229570188 | ACTA1    | 0.25  | 9.98E-06 | 1.65E-03 |
| cg18601714 | 17 | 25485531  |          | -0.23 | 9.98E-06 | 1.65E-03 |
| cg10420161 | 10 | 102899983 |          | 0.28  | 9.98E-06 | 1.65E-03 |
| cg25850845 | 1  | 231155632 | FAM89A   | -0.22 | 9.98E-06 | 1.65E-03 |
| cg23413104 | 2  | 118982263 |          | 0.26  | 9.99E-06 | 1.65E-03 |
| cg13318787 | 5  | 50262177  |          | 0.21  | 1.00E-05 | 1.66E-03 |
| cg07227926 | 12 | 104609526 | TXNRD1   | 0.23  | 1.00E-05 | 1.66E-03 |
| cg04697454 | 15 | 93633408  | RGMA     | 0.21  | 1.00E-05 | 1.66E-03 |
| cg06798642 | 4  | 48272082  | TEC      | 0.29  | 1.01E-05 | 1.66E-03 |
| cg22289831 | 21 | 38076709  | SIM2     | 0.24  | 1.01E-05 | 1.66E-03 |
| cg21097354 | 7  | 27179161  |          | 0.29  | 1.01E-05 | 1.66E-03 |
| cg17229173 | 5  | 67483875  |          | -0.24 | 1.01E-05 | 1.67E-03 |
| cg20303399 | 8  | 26722965  | ADRA1A   | 0.27  | 1.02E-05 | 1.67E-03 |
| cg16556145 | 13 | 96205184  | CLDN10   | 0.28  | 1.02E-05 | 1.68E-03 |
| cg02940362 | 11 | 5009201   | MMP26    | -0.24 | 1.02E-05 | 1.68E-03 |
| cg02729822 | 11 | 56510971  | OR9G4    | -0.27 | 1.02E-05 | 1.68E-03 |
| cg13577505 | 22 | 50706248  | MAPK11   | 0.26  | 1.02E-05 | 1.68E-03 |
| cg13651483 | 19 | 48566587  | PLA2G4C  | -0.21 | 1.02E-05 | 1.68E-03 |
| cg12140851 | 7  | 26897612  | SKAP2    | 0.27  | 1.02E-05 | 1.68E-03 |
| cg00947782 | 6  | 30039142  | RNF39    | 0.28  | 1.03E-05 | 1.68E-03 |
| cg24817358 | 6  | 29275285  | OR14J1   | -0.21 | 1.03E-05 | 1.68E-03 |
| cg09867598 | 5  | 122429517 | PRDM6    | 0.29  | 1.04E-05 | 1.70E-03 |
| cg16277169 | 12 | 115112189 | TBX3     | 0.22  | 1.04E-05 | 1.70E-03 |
| cg18709382 | 5  | 42972820  |          | 0.23  | 1.04E-05 | 1.70E-03 |
| cg16202331 | 4  | 13532655  |          | 0.26  | 1.05E-05 | 1.71E-03 |
| cg06707343 | 3  | 62360240  | FEZF2    | 0.23  | 1.05E-05 | 1.71E-03 |
| cg14950829 | 13 | 53419617  | PCDH8    | 0.28  | 1.05E-05 | 1.71E-03 |
| cg07921625 | 13 | 58208350  | PCDH17   | 0.27  | 1.06E-05 | 1.71E-03 |
| cg13720705 | 10 | 37990370  |          | 0.23  | 1.06E-05 | 1.71E-03 |
| cg03978169 | 6  | 33091357  | HLA-DPB2 | -0.23 | 1.06E-05 | 1.71E-03 |
| cg13888593 | 2  | 74642470  | C2orf81  | 0.27  | 1.06E-05 | 1.72E-03 |
| cg23480619 | 21 | 35831871  | KCNE1    | 0.29  | 1.06E-05 | 1.72E-03 |
| cg23020891 | 3  | 180502503 |          | -0.21 | 1.06E-05 | 1.72E-03 |
| cg02274869 | 19 | 11784955  | ZNF833   | 0.22  | 1.07E-05 | 1.72E-03 |
| cg24641276 | 5  | 170743715 |          | 0.25  | 1.07E-05 | 1.73E-03 |
| cg23520574 | 11 | 4928572   | OR51A7   | -0.28 | 1.08E-05 | 1.73E-03 |
| cg17858328 | 1  | 92952521  | GFI1     | 0.30  | 1.08E-05 | 1.74E-03 |
| cg19219624 | 7  | 97362523  | TAC1     | 0.29  | 1.08E-05 | 1.74E-03 |
| cg09375620 | 6  | 159590155 | FNDC1    | 0.21  | 1.09E-05 | 1.74E-03 |
| cg06419659 | 1  | 153600132 | S100A13  | 0.22  | 1.09E-05 | 1.74E-03 |
| cg08005165 | 8  | 55380663  |          | 0.24  | 1.09E-05 | 1.74E-03 |
| cg20257553 | 2  | 160919462 | PLA2R1   | 0.23  | 1.09E-05 | 1.74E-03 |
| cg09853898 | 19 | 591536    | HCN2     | 0.23  | 1.09E-05 | 1.75E-03 |
| cg15812348 | 3  | 62359390  | FEZF2    | 0.28  | 1.09E-05 | 1.75E-03 |
| cg07897690 | 2  | 200328645 |          | 0.22  | 1.10E-05 | 1.75E-03 |
| cg26346796 | 6  | 32054867  | TNXB     | 0.22  | 1.10E-05 | 1.75E-03 |
| cg10668926 | 13 | 28527255  |          | 0.24  | 1.10E-05 | 1.75E-03 |
| cg00249511 | 11 | 627152    | SCT      | 0.30  | 1.10E-05 | 1.75E-03 |
| cg06338499 | 18 | 34854300  | BRUNOL4  | 0.25  | 1.10E-05 | 1.76E-03 |
| cg18902978 | 9  | 6703949   |          | 0.23  | 1.11E-05 | 1.76E-03 |
| cg10648139 | 2  | 206551364 | NRP2     | 0.27  | 1.11E-05 | 1.76E-03 |
| cg04290346 | 11 | 20177852  | DBX1     | 0.30  | 1.11E-05 | 1.76E-03 |
| cg09404551 | 8  | 121136951 | COL14A1  | 0.23  | 1.11E-05 | 1.76E-03 |
| cg26777456 | 12 | 54454250  | FLJ12825 | 0.24  | 1.11E-05 | 1.76E-03 |
| cg15382095 | 17 | 37762367  | NEUROD2  | 0.30  | 1.11E-05 | 1.76E-03 |
| cg24472375 | 6  | 108485102 |          | 0.31  | 1.11E-05 | 1.76E-03 |
| cg03972745 | 1  | 4222311   |          | -0.20 | 1.11E-05 | 1.76E-03 |
| cg08814405 | 7  | 19183753  |          | 0.30  | 1.12E-05 | 1.77E-03 |
| cg12492670 | 11 | 50231261  |          | -0.23 | 1.12E-05 | 1.77E-03 |
| cg18358869 | 10 | 102808077 |          | 0.23  | 1.12E-05 | 1.77E-03 |
| cg26606286 | 4  | 174440471 |          | 0.27  | 1.13E-05 | 1.78E-03 |
| cg08624472 | 7  | 98971852  | ARPC1B   | 0.26  | 1.13E-05 | 1.78E-03 |
| cg01151135 | 19 | 34311174  |          | 0.26  | 1.13E-05 | 1.78E-03 |
| cg12174341 | 8  | 41424342  |          | 0.23  | 1.13E-05 | 1.78E-03 |
| cg02339752 | 16 | 86549705  |          | 0.21  | 1.13E-05 | 1.78E-03 |
| cg17981058 | 2  | 223176398 |          | 0.26  | 1.13E-05 | 1.78E-03 |

|            |    |           |           |       |          |          |
|------------|----|-----------|-----------|-------|----------|----------|
| cg22683010 | 2  | 2570283   |           | -0.21 | 1.13E-05 | 1.78E-03 |
| cg06284231 | 14 | 38724255  | CLEC14A   | 0.21  | 1.14E-05 | 1.78E-03 |
| cg15831743 | 5  | 122421924 |           | 0.21  | 1.14E-05 | 1.79E-03 |
| cg27032146 | 7  | 96652115  | DLX5      | 0.28  | 1.14E-05 | 1.79E-03 |
| cg23289079 | 5  | 122430476 | PRDM6     | 0.24  | 1.14E-05 | 1.79E-03 |
| cg10419709 | 17 | 58216651  |           | 0.28  | 1.14E-05 | 1.79E-03 |
| cg14496753 | 9  | 124979184 | LHX6      | 0.23  | 1.14E-05 | 1.79E-03 |
| cg11317199 | 9  | 100850391 | TRIM14    | 0.24  | 1.15E-05 | 1.79E-03 |
| cg04103761 | 1  | 26735606  |           | 0.23  | 1.15E-05 | 1.80E-03 |
| cg21475544 | 12 | 12849588  | GPR19     | 0.26  | 1.16E-05 | 1.81E-03 |
| cg08932654 | 17 | 38084459  | ORMDL3    | 0.22  | 1.16E-05 | 1.81E-03 |
| cg01297756 | 13 | 100548415 | CLYBL     | 0.26  | 1.16E-05 | 1.81E-03 |
| cg08747277 | 6  | 96048126  | MANEA     | -0.24 | 1.16E-05 | 1.81E-03 |
| cg02334722 | 11 | 44342177  |           | 0.22  | 1.17E-05 | 1.81E-03 |
| cg00697992 | 2  | 139537131 | NXPH2     | 0.27  | 1.17E-05 | 1.81E-03 |
| cg08101303 | 7  | 96652222  | DLX5      | 0.30  | 1.17E-05 | 1.81E-03 |
| cg10414006 | 16 | 34984121  |           | -0.29 | 1.17E-05 | 1.81E-03 |
| cg08949655 | 2  | 176940301 |           | 0.24  | 1.17E-05 | 1.81E-03 |
| cg21990700 | 12 | 7260776   | LOC283314 | 0.21  | 1.17E-05 | 1.82E-03 |
| cg22709192 | 12 | 54366909  | HOXC11    | 0.23  | 1.17E-05 | 1.82E-03 |
| cg23890008 | 11 | 20229545  |           | 0.25  | 1.18E-05 | 1.83E-03 |
| cg15877129 | 12 | 103218238 |           | 0.26  | 1.19E-05 | 1.83E-03 |
| cg26422151 | 10 | 88136949  |           | 0.24  | 1.19E-05 | 1.83E-03 |
| cg07831351 | 20 | 3229402   |           | 0.27  | 1.19E-05 | 1.83E-03 |
| cg26348514 | 20 | 44098358  | WFDC2     | 0.25  | 1.19E-05 | 1.84E-03 |
| cg01755009 | 1  | 247978690 | OR14A16   | -0.22 | 1.20E-05 | 1.84E-03 |
| cg26527487 | 1  | 99469819  | LPPR5     | 0.24  | 1.20E-05 | 1.84E-03 |
| cg14034325 | 10 | 43891459  | HNRNPF    | 0.23  | 1.20E-05 | 1.85E-03 |
| cg00303982 | 8  | 145556952 | SCRT1     | 0.27  | 1.20E-05 | 1.85E-03 |
| cg12590051 | 12 | 54398891  |           | 0.21  | 1.21E-05 | 1.85E-03 |
| cg10133465 | 8  | 97166862  | GDF6      | 0.26  | 1.21E-05 | 1.85E-03 |
| cg14151783 | 20 | 44098409  | WFDC2     | 0.27  | 1.21E-05 | 1.85E-03 |
| cg10542123 | 10 | 1686470   | ADARB2    | -0.25 | 1.21E-05 | 1.85E-03 |
| cg12854371 | 17 | 62776373  | LOC146880 | 0.22  | 1.21E-05 | 1.85E-03 |
| cg02893231 | 1  | 190444761 | FAM5C     | 0.26  | 1.22E-05 | 1.86E-03 |
| cg23606421 | 9  | 140330621 | ENTPD8    | -0.21 | 1.22E-05 | 1.86E-03 |
| cg13530938 | 2  | 239140190 | LOC151174 | 0.28  | 1.23E-05 | 1.87E-03 |
| cg03585731 | 6  | 30483882  |           | 0.25  | 1.23E-05 | 1.88E-03 |
| cg16626067 | 16 | 66613266  | CMTM2     | 0.28  | 1.24E-05 | 1.88E-03 |
| cg12060123 | 11 | 5668206   | TRIM78P   | -0.22 | 1.24E-05 | 1.88E-03 |
| cg10745499 | 6  | 100906685 | SIM1      | 0.27  | 1.24E-05 | 1.88E-03 |
| cg22783363 | 8  | 23021553  | TNFRSF10D | 0.24  | 1.24E-05 | 1.88E-03 |
| cg02930996 | 18 | 29265842  | B4GALT6   | 0.26  | 1.24E-05 | 1.88E-03 |
| cg26888836 | 4  | 48272120  | TEC       | 0.28  | 1.24E-05 | 1.88E-03 |
| cg13578408 | 7  | 8475484   | NXPH1     | 0.23  | 1.25E-05 | 1.88E-03 |
| cg16477690 | 18 | 30051572  | FAM59A    | 0.24  | 1.25E-05 | 1.88E-03 |
| cg05898953 | 10 | 74870240  | NUDT13    | 0.27  | 1.25E-05 | 1.88E-03 |
| cg15908921 | 17 | 77776587  |           | 0.27  | 1.25E-05 | 1.88E-03 |
| cg04046669 | 22 | 30476206  | HORMAD2   | 0.28  | 1.25E-05 | 1.88E-03 |
| cg23291280 | 19 | 31847970  |           | 0.29  | 1.25E-05 | 1.88E-03 |
| cg11849086 | 17 | 62776530  | LOC146880 | 0.23  | 1.25E-05 | 1.89E-03 |
| cg07027513 | 18 | 29265840  | B4GALT6   | 0.23  | 1.25E-05 | 1.89E-03 |
| cg00814752 | 18 | 56941706  | RAX       | 0.22  | 1.26E-05 | 1.89E-03 |
| cg02282631 | 5  | 42953543  |           | 0.29  | 1.27E-05 | 1.91E-03 |
| cg02101486 | 7  | 96652245  | DLX5      | 0.27  | 1.27E-05 | 1.91E-03 |
| cg11246938 | 12 | 115112433 | TBX3      | 0.23  | 1.27E-05 | 1.91E-03 |
| cg23008606 | 8  | 26722933  | ADRA1A    | 0.27  | 1.27E-05 | 1.91E-03 |
| cg23685155 | 12 | 54396440  | HOXC9     | 0.25  | 1.28E-05 | 1.91E-03 |
| cg06421774 | 5  | 2066690   |           | 0.20  | 1.28E-05 | 1.91E-03 |
| cg02824888 | 12 | 115129011 |           | 0.25  | 1.28E-05 | 1.92E-03 |
| cg16922039 | 18 | 12287385  |           | 0.21  | 1.28E-05 | 1.92E-03 |
| cg01460436 | 20 | 44687454  | SLC12A5   | 0.24  | 1.29E-05 | 1.92E-03 |
| cg16204205 | 18 | 19753432  | GATA6     | 0.21  | 1.29E-05 | 1.92E-03 |
| cg20027296 | 5  | 170737396 | TLX3      | 0.23  | 1.29E-05 | 1.93E-03 |
| cg25178784 | 11 | 64875750  | C11orf2   | -0.22 | 1.29E-05 | 1.93E-03 |
| cg22268510 | 6  | 32118420  | PRRT1     | 0.28  | 1.29E-05 | 1.93E-03 |

|            |    |           |            |       |          |          |
|------------|----|-----------|------------|-------|----------|----------|
| cg04010915 | 12 | 110547053 |            | -0.21 | 1.29E-05 | 1.93E-03 |
| cg19404832 | 6  | 50681114  | TFAP2D     | 0.25  | 1.30E-05 | 1.93E-03 |
| cg18988435 | 18 | 12287275  |            | 0.22  | 1.30E-05 | 1.94E-03 |
| cg02456087 | 7  | 27291541  |            | 0.24  | 1.30E-05 | 1.94E-03 |
| cg17104824 | 2  | 177014959 | HOXD4      | 0.27  | 1.31E-05 | 1.94E-03 |
| cg06640593 | 2  | 568321    |            | -0.22 | 1.31E-05 | 1.94E-03 |
| cg06581175 | 7  | 96632635  | DLX6AS     | 0.27  | 1.31E-05 | 1.94E-03 |
| cg23497383 | 2  | 239140182 | LOC1511174 | 0.27  | 1.32E-05 | 1.95E-03 |
| cg08940787 | 17 | 62777648  | LOC146880  | 0.25  | 1.32E-05 | 1.95E-03 |
| cg19095187 | 6  | 108437051 |            | 0.26  | 1.32E-05 | 1.95E-03 |
| cg01216882 | 20 | 31804277  | C20orf71   | -0.21 | 1.33E-05 | 1.96E-03 |
| cg02027878 | 7  | 150711138 | ATG9B      | 0.25  | 1.33E-05 | 1.96E-03 |
| cg16108230 | 6  | 117584815 |            | 0.24  | 1.35E-05 | 1.98E-03 |
| cg26099134 | 6  | 100897309 | SIM1       | 0.20  | 1.35E-05 | 1.98E-03 |
| cg13160874 | 2  | 242549431 | THAP4      | 0.23  | 1.35E-05 | 1.98E-03 |
| cg05121480 | 3  | 187387601 | SST        | 0.27  | 1.35E-05 | 1.98E-03 |
| cg19519747 | 2  | 177014555 | MIR10B     | 0.23  | 1.36E-05 | 1.98E-03 |
| cg05774915 | 3  | 27755417  |            | 0.31  | 1.37E-05 | 2.00E-03 |
| cg18042724 | 11 | 20627327  | SLC6A5     | 0.24  | 1.37E-05 | 2.00E-03 |
| cg21127537 | 11 | 113184936 | TTC12      | 0.26  | 1.37E-05 | 2.00E-03 |
| cg16110759 | 12 | 54330320  |            | 0.23  | 1.37E-05 | 2.00E-03 |
| cg19657174 | 22 | 19746268  | TBX1       | 0.30  | 1.37E-05 | 2.00E-03 |
| cg09744068 | 10 | 125732787 |            | 0.23  | 1.37E-05 | 2.00E-03 |
| cg08454824 | 8  | 637468    | ERICH1     | 0.21  | 1.38E-05 | 2.01E-03 |
| cg04622024 | 1  | 38201001  | EPHA10     | 0.22  | 1.39E-05 | 2.01E-03 |
| cg11571761 | 5  | 95298041  | ELL2       | 0.22  | 1.39E-05 | 2.02E-03 |
| cg09737314 | 17 | 6899359   | ALOX12     | 0.25  | 1.39E-05 | 2.02E-03 |
| cg03094519 | 17 | 37761662  | NEUROD2    | 0.21  | 1.39E-05 | 2.02E-03 |
| cg01438291 | 11 | 71567175  |            | -0.22 | 1.39E-05 | 2.02E-03 |
| cg02787917 | 2  | 175190821 |            | 0.24  | 1.40E-05 | 2.02E-03 |
| cg18007463 | 4  | 166795913 | TLL1       | 0.24  | 1.40E-05 | 2.02E-03 |
| cg21332729 | 5  | 95170798  |            | 0.28  | 1.40E-05 | 2.02E-03 |
| cg21332500 | 7  | 27233480  |            | 0.21  | 1.40E-05 | 2.02E-03 |
| cg25100880 | 11 | 5878019   | OR52E8     | -0.22 | 1.40E-05 | 2.02E-03 |
| cg19164987 | 12 | 54413000  | HOXC4      | 0.26  | 1.40E-05 | 2.02E-03 |
| cg23037321 | 1  | 181003203 | MR1        | -0.27 | 1.42E-05 | 2.04E-03 |
| cg02078520 | 1  | 84944298  | RPF1       | -0.22 | 1.42E-05 | 2.04E-03 |
| cg22306928 | 2  | 219866424 | MIR375     | 0.26  | 1.42E-05 | 2.04E-03 |
| cg20521702 | 3  | 98452812  | ST3GAL6    | 0.25  | 1.42E-05 | 2.04E-03 |
| cg27346037 | 6  | 106442129 |            | 0.21  | 1.42E-05 | 2.04E-03 |
| cg10113212 | 14 | 92790798  | SLC24A4    | 0.21  | 1.42E-05 | 2.04E-03 |
| cg26263234 | 3  | 26666060  | LRRC3B     | 0.27  | 1.43E-05 | 2.05E-03 |
| cg13455326 | 19 | 10043341  | OLFM2      | -0.25 | 1.43E-05 | 2.05E-03 |
| cg13677149 | 7  | 27284789  | EVX1       | 0.29  | 1.44E-05 | 2.06E-03 |
| cg06825512 | 18 | 10453969  | APCDD1     | 0.21  | 1.44E-05 | 2.06E-03 |
| cg17304496 | 2  | 37572289  | QPCT       | 0.27  | 1.45E-05 | 2.07E-03 |
| cg27339437 | 10 | 16478863  | PTER       | 0.27  | 1.45E-05 | 2.07E-03 |
| cg07747336 | 11 | 125649398 | PATE2      | -0.20 | 1.47E-05 | 2.09E-03 |
| cg08873424 | 6  | 28945492  |            | 0.22  | 1.47E-05 | 2.09E-03 |
| cg14677698 | 5  | 3197730   |            | 0.26  | 1.47E-05 | 2.09E-03 |
| cg25310824 | 5  | 42812334  | SEPP1      | -0.25 | 1.47E-05 | 2.09E-03 |
| cg25596754 | 6  | 32026610  | TNXB       | -0.22 | 1.47E-05 | 2.09E-03 |
| cg07104958 | 10 | 46168551  | ANUBL1     | 0.20  | 1.48E-05 | 2.09E-03 |
| cg19416570 | 19 | 58715677  | ZNF274     | 0.22  | 1.48E-05 | 2.10E-03 |
| cg16547027 | 18 | 24127588  | KCTD1      | 0.28  | 1.48E-05 | 2.10E-03 |
| cg05000331 | 16 | 79623678  |            | 0.24  | 1.49E-05 | 2.10E-03 |
| cg13719746 | 9  | 100747559 | ANP32B     | 0.29  | 1.49E-05 | 2.10E-03 |
| cg03618016 | 1  | 247769804 | OR2G3      | -0.27 | 1.49E-05 | 2.11E-03 |
| cg07636194 | 6  | 27107282  | HIST1H2BK  | 0.31  | 1.49E-05 | 2.11E-03 |
| cg06666025 | 16 | 66613278  | CMTM2      | 0.27  | 1.50E-05 | 2.11E-03 |
| cg07485198 | 8  | 95246699  |            | 0.21  | 1.50E-05 | 2.12E-03 |
| cg00481951 | 3  | 187387650 | SST        | 0.25  | 1.53E-05 | 2.14E-03 |
| cg21100077 | 13 | 100627366 |            | 0.28  | 1.53E-05 | 2.14E-03 |
| cg11375458 | 2  | 177003996 |            | 0.24  | 1.53E-05 | 2.14E-03 |
| cg11329058 | 17 | 78549358  | RPTOR      | 0.22  | 1.53E-05 | 2.14E-03 |
| cg12296751 | 7  | 116166734 | CAV1       | 0.23  | 1.53E-05 | 2.14E-03 |

|            |    |           |           |       |          |          |
|------------|----|-----------|-----------|-------|----------|----------|
| cg02335804 | 17 | 36105239  | HNF1B     | 0.22  | 1.54E-05 | 2.15E-03 |
| cg03555836 | 8  | 41422764  |           | 0.21  | 1.55E-05 | 2.15E-03 |
| cg20432507 | 20 | 21689861  | PAX1      | 0.23  | 1.55E-05 | 2.15E-03 |
| cg00976453 | 20 | 48099479  | KCNB1     | 0.28  | 1.55E-05 | 2.15E-03 |
| cg17160382 | 6  | 121758980 | GJA1      | 0.30  | 1.55E-05 | 2.16E-03 |
| cg04413320 | 13 | 58208929  | PCDH17    | 0.27  | 1.55E-05 | 2.16E-03 |
| cg27606396 | 2  | 113542117 | IL1A      | -0.26 | 1.55E-05 | 2.16E-03 |
| cg11236429 | 4  | 174459412 | NBLA00301 | 0.26  | 1.55E-05 | 2.16E-03 |
| cg15684962 | 6  | 99273315  |           | 0.24  | 1.55E-05 | 2.16E-03 |
| cg07323141 | 2  | 239140169 | LOC151174 | 0.24  | 1.55E-05 | 2.16E-03 |
| cg14983771 | 14 | 61201189  | MNAT1     | -0.21 | 1.57E-05 | 2.17E-03 |
| cg10411590 | 13 | 21900810  |           | 0.21  | 1.57E-05 | 2.18E-03 |
| cg11051055 | 8  | 11058145  | XKR6      | 0.29  | 1.58E-05 | 2.18E-03 |
| cg22352078 | 8  | 41424982  |           | 0.26  | 1.58E-05 | 2.18E-03 |
| cg06456154 | 10 | 119310356 |           | 0.21  | 1.58E-05 | 2.18E-03 |
| cg25576818 | 7  | 27233141  |           | 0.25  | 1.59E-05 | 2.19E-03 |
| cg07753583 | 7  | 150020206 | LRRC61    | 0.20  | 1.59E-05 | 2.19E-03 |
| cg27505504 | 15 | 32964155  | SCG5      | -0.22 | 1.61E-05 | 2.20E-03 |
| cg04424930 | 10 | 43892790  | HNRNPF    | 0.23  | 1.61E-05 | 2.20E-03 |
| cg17634797 | 6  | 75945095  |           | -0.20 | 1.61E-05 | 2.21E-03 |
| cg22849665 | 6  | 32118375  | PRRT1     | 0.25  | 1.61E-05 | 2.21E-03 |
| cg00014998 | 2  | 177014962 | HOXD4     | 0.27  | 1.62E-05 | 2.21E-03 |
| cg26554505 | 3  | 55516711  | WNT5A     | 0.25  | 1.62E-05 | 2.21E-03 |
| cg25730298 | 1  | 245581404 | KIF26B    | -0.25 | 1.62E-05 | 2.21E-03 |
| cg02077084 | 1  | 248549941 | OR2T6     | -0.23 | 1.62E-05 | 2.21E-03 |
| cg03278726 | 1  | 1109832   | TTL10     | 0.22  | 1.62E-05 | 2.21E-03 |
| cg09183124 | 1  | 173092323 |           | 0.20  | 1.62E-05 | 2.21E-03 |
| cg04676482 | 4  | 111536216 |           | 0.21  | 1.63E-05 | 2.22E-03 |
| cg20229534 | 6  | 10882250  | GCM2      | 0.29  | 1.64E-05 | 2.23E-03 |
| cg21063716 | 11 | 2292787   | ASCL2     | 0.21  | 1.64E-05 | 2.23E-03 |
| cg12710648 | 1  | 7308091   | CAMTA1    | -0.25 | 1.64E-05 | 2.23E-03 |
| cg08053137 | 12 | 54385436  | MIR196A2  | 0.24  | 1.65E-05 | 2.23E-03 |
| cg01392518 | 6  | 166583226 | T         | 0.20  | 1.65E-05 | 2.23E-03 |
| cg15347342 | 6  | 108490485 | NR2E1     | 0.25  | 1.65E-05 | 2.24E-03 |
| cg26645401 | 11 | 9686514   | SWAP70    | 0.26  | 1.66E-05 | 2.25E-03 |
| cg05408649 | 12 | 54446019  | HOXC4     | 0.30  | 1.67E-05 | 2.25E-03 |
| cg14207728 | 1  | 67217886  | TCTEX1D1  | 0.25  | 1.67E-05 | 2.25E-03 |
| cg04032071 | 12 | 54376241  |           | 0.20  | 1.67E-05 | 2.26E-03 |
| cg09422450 | 16 | 79623618  |           | 0.26  | 1.68E-05 | 2.26E-03 |
| cg01229998 | 11 | 60049447  | MS4A4A    | -0.21 | 1.68E-05 | 2.26E-03 |
| cg06630413 | 12 | 54366875  | HOXC11    | 0.25  | 1.68E-05 | 2.26E-03 |
| cg07216425 | 12 | 53297819  | KRT8      | 0.24  | 1.68E-05 | 2.26E-03 |
| cg11847222 | 5  | 77268624  |           | 0.26  | 1.69E-05 | 2.27E-03 |
| cg23712018 | 6  | 30039132  | RNF39     | 0.24  | 1.69E-05 | 2.27E-03 |
| cg15732658 | 6  | 10410042  | TFAP2A    | 0.22  | 1.70E-05 | 2.28E-03 |
| cg16057826 | 21 | 36041334  | CLIC6     | 0.22  | 1.71E-05 | 2.29E-03 |
| cg15828364 | 11 | 20626786  | SLC6A5    | 0.23  | 1.71E-05 | 2.29E-03 |
| cg23385248 | 15 | 93579332  |           | 0.23  | 1.71E-05 | 2.29E-03 |
| cg24961583 | 3  | 27765409  |           | 0.32  | 1.72E-05 | 2.29E-03 |
| cg19403541 | 4  | 174438312 |           | 0.29  | 1.72E-05 | 2.30E-03 |
| cg04707408 | 7  | 27233073  |           | 0.26  | 1.72E-05 | 2.30E-03 |
| cg08178940 | 6  | 50808627  | TFAP2B    | 0.28  | 1.73E-05 | 2.30E-03 |
| cg09656020 | 15 | 33009409  | GREM1     | 0.22  | 1.73E-05 | 2.31E-03 |
| cg00303183 | 2  | 162283559 |           | 0.24  | 1.74E-05 | 2.32E-03 |
| cg00690271 | 12 | 49658716  | TUBA1C    | 0.25  | 1.74E-05 | 2.32E-03 |
| cg15234400 | 4  | 174453166 | NBLA00301 | 0.21  | 1.75E-05 | 2.32E-03 |
| cg13278353 | 2  | 208635942 |           | 0.22  | 1.75E-05 | 2.32E-03 |
| cg03423957 | 22 | 31555670  | RNF185    | -0.23 | 1.75E-05 | 2.32E-03 |
| cg05307533 | 7  | 27531652  |           | -0.20 | 1.76E-05 | 2.33E-03 |
| cg01663018 | 15 | 53097777  |           | 0.28  | 1.76E-05 | 2.33E-03 |
| cg09325156 | 12 | 46660749  | SLC38A1   | 0.26  | 1.76E-05 | 2.33E-03 |
| cg09577115 | 20 | 21497180  |           | 0.20  | 1.77E-05 | 2.34E-03 |
| cg06232130 | 2  | 157177008 |           | 0.23  | 1.77E-05 | 2.34E-03 |
| cg13774019 | 9  | 37029805  | PAX5      | 0.23  | 1.77E-05 | 2.34E-03 |
| cg03557857 | 10 | 103589693 | KCNIP2    | 0.23  | 1.77E-05 | 2.34E-03 |
| cg27160395 | 2  | 177014949 | HOXD4     | 0.25  | 1.77E-05 | 2.34E-03 |

|            |    |           |              |       |          |          |
|------------|----|-----------|--------------|-------|----------|----------|
| cg12097325 | 1  | 1076431   |              | 0.21  | 1.78E-05 | 2.34E-03 |
| cg00169725 | 5  | 176543901 |              | 0.22  | 1.78E-05 | 2.35E-03 |
| cg10024909 | 4  | 174452985 | NBLA00301    | 0.23  | 1.78E-05 | 2.35E-03 |
| cg10604851 | 12 | 103344336 |              | 0.22  | 1.79E-05 | 2.35E-03 |
| cg05852276 | 5  | 140579470 | PCDHB11      | 0.22  | 1.79E-05 | 2.35E-03 |
| cg16971668 | 3  | 27764810  | EOMES        | 0.29  | 1.80E-05 | 2.36E-03 |
| cg10188253 | 19 | 43908315  | TEX101       | -0.21 | 1.80E-05 | 2.36E-03 |
| cg13718418 | 12 | 85672285  |              | 0.24  | 1.80E-05 | 2.36E-03 |
| cg00674679 | 2  | 176931680 |              | 0.26  | 1.80E-05 | 2.36E-03 |
| cg10881225 | 2  | 9984929   | TAF1B        | 0.21  | 1.81E-05 | 2.37E-03 |
| cg25845367 | 13 | 100627175 |              | 0.32  | 1.82E-05 | 2.38E-03 |
| cg12749132 | 1  | 151811364 | LOC100132111 | 0.31  | 1.82E-05 | 2.38E-03 |
| cg17935422 | 4  | 2733397   | FAM193A      | -0.22 | 1.82E-05 | 2.38E-03 |
| cg21237687 | 17 | 6899380   | ALOX12       | 0.24  | 1.82E-05 | 2.38E-03 |
| cg02397571 | 8  | 28175463  | PNOC         | -0.22 | 1.83E-05 | 2.38E-03 |
| cg08614290 | 7  | 158938491 | VIPR2        | 0.29  | 1.83E-05 | 2.38E-03 |
| cg10077468 | 15 | 91498367  | RCCD1        | 0.26  | 1.83E-05 | 2.39E-03 |
| cg06680397 | 5  | 135527376 | LOC389332    | 0.24  | 1.83E-05 | 2.39E-03 |
| cg01405004 | 3  | 68980539  | FAM19A4      | 0.22  | 1.86E-05 | 2.41E-03 |
| cg06148812 | 22 | 19746368  | TBX1         | 0.25  | 1.86E-05 | 2.41E-03 |
| cg12307823 | 15 | 67143737  |              | 0.22  | 1.86E-05 | 2.42E-03 |
| cg16297569 | 1  | 92952517  | GFI1         | 0.28  | 1.86E-05 | 2.42E-03 |
| cg03915638 | 3  | 62356042  | FEZF2        | 0.23  | 1.87E-05 | 2.42E-03 |
| cg02393380 | 20 | 1304919   | SDCBP2       | -0.22 | 1.88E-05 | 2.43E-03 |
| cg17866732 | 2  | 110372875 | Sep-10       | 0.22  | 1.88E-05 | 2.43E-03 |
| cg08158662 | 12 | 34489995  |              | -0.21 | 1.88E-05 | 2.43E-03 |
| cg06248560 | 18 | 35104681  | BRUNOL4      | 0.24  | 1.88E-05 | 2.43E-03 |
| cg25301173 | 2  | 190984844 |              | -0.22 | 1.89E-05 | 2.43E-03 |
| cg05713954 | 16 | 49518536  |              | 0.23  | 1.89E-05 | 2.43E-03 |
| cg11012584 | 2  | 242549943 | THAP4        | 0.21  | 1.89E-05 | 2.43E-03 |
| cg13694927 | 7  | 27184712  | HOXA5        | 0.21  | 1.89E-05 | 2.43E-03 |
| cg00527440 | 2  | 242549864 | THAP4        | 0.27  | 1.89E-05 | 2.43E-03 |
| cg21027124 | 4  | 144831061 |              | 0.21  | 1.90E-05 | 2.45E-03 |
| cg06396119 | 13 | 49792767  |              | 0.21  | 1.91E-05 | 2.45E-03 |
| cg07495357 | 6  | 43021181  | CUL7         | 0.27  | 1.91E-05 | 2.45E-03 |
| cg01571001 | 3  | 128215433 |              | 0.31  | 1.91E-05 | 2.45E-03 |
| cg26492368 | 10 | 22634733  | SPAG6        | 0.25  | 1.91E-05 | 2.45E-03 |
| cg23244790 | 5  | 140811102 | PCDHGA4      | 0.21  | 1.92E-05 | 2.46E-03 |
| cg11668749 | 1  | 229568360 | ACTA1        | 0.23  | 1.93E-05 | 2.47E-03 |
| cg08468911 | 21 | 35832180  | KCNE1        | 0.25  | 1.93E-05 | 2.47E-03 |
| cg07553761 | 3  | 160167977 | TRIM59       | 0.21  | 1.95E-05 | 2.49E-03 |
| cg03730533 | 7  | 26897685  | SKAP2        | 0.27  | 1.95E-05 | 2.49E-03 |
| cg02128244 | 19 | 31848008  |              | 0.25  | 1.95E-05 | 2.49E-03 |
| cg09502207 | 8  | 133774222 | TMEM71       | -0.21 | 1.95E-05 | 2.49E-03 |
| cg17204129 | 7  | 117119601 | CFTR         | 0.26  | 1.95E-05 | 2.49E-03 |
| cg18771937 | 12 | 54385517  | MIR196A2     | 0.21  | 1.96E-05 | 2.49E-03 |
| cg10517650 | 3  | 113235015 | CCDC52       | -0.24 | 1.96E-05 | 2.49E-03 |
| cg09854734 | 16 | 66613273  | CMTM2        | 0.26  | 1.96E-05 | 2.49E-03 |
| cg19815327 | 3  | 32023353  | ZNF860       | 0.22  | 1.97E-05 | 2.50E-03 |
| cg01344452 | 17 | 54912143  | DGKE         | 0.28  | 1.97E-05 | 2.50E-03 |
| cg19961480 | 6  | 88877216  | CNR1         | 0.26  | 1.97E-05 | 2.50E-03 |
| cg01581974 | 12 | 49658713  | TUBA1C       | 0.27  | 1.97E-05 | 2.50E-03 |
| cg12390344 | 18 | 21270348  | LAMA3        | 0.20  | 1.97E-05 | 2.50E-03 |
| cg12569013 | 8  | 11549572  |              | 0.21  | 1.97E-05 | 2.50E-03 |
| cg20817902 | 4  | 81124121  | PRDM8        | 0.26  | 1.98E-05 | 2.51E-03 |
| cg14314744 | 6  | 100897445 | SIM1         | 0.23  | 1.98E-05 | 2.51E-03 |
| cg05179921 | 12 | 9905753   | CD69         | -0.25 | 1.98E-05 | 2.51E-03 |
| cg03722396 | 4  | 111537907 |              | 0.28  | 1.98E-05 | 2.51E-03 |
| cg20232746 | 4  | 174440598 |              | 0.23  | 1.98E-05 | 2.51E-03 |
| cg18575740 | 4  | 174457224 | NBLA00301    | 0.24  | 1.99E-05 | 2.51E-03 |
| cg04317962 | 16 | 79623625  |              | 0.25  | 2.00E-05 | 2.52E-03 |
| cg15083015 | 11 | 20625714  | SLC6A5       | 0.25  | 2.01E-05 | 2.54E-03 |
| cg16764274 | 2  | 223290168 | SGPP2        | 0.24  | 2.01E-05 | 2.54E-03 |
| cg26963367 | 15 | 89157841  |              | 0.22  | 2.02E-05 | 2.54E-03 |
| cg04473302 | 7  | 107301217 | SLC26A4      | 0.22  | 2.02E-05 | 2.54E-03 |
| cg02081733 | 15 | 68120412  | LBXCOR1      | 0.25  | 2.03E-05 | 2.55E-03 |

|            |    |           |           |       |          |          |
|------------|----|-----------|-----------|-------|----------|----------|
| cg26310483 | 6  | 30421376  |           | 0.22  | 2.03E-05 | 2.55E-03 |
| cg10414946 | 11 | 59856358  | MS4A2     | -0.21 | 2.03E-05 | 2.55E-03 |
| cg20380689 | 5  | 37836392  | GDNF      | 0.21  | 2.03E-05 | 2.55E-03 |
| cg20540714 | 6  | 10415873  | TFAP2A    | 0.22  | 2.03E-05 | 2.55E-03 |
| cg14501219 | 17 | 62775713  | LOC146880 | 0.21  | 2.04E-05 | 2.55E-03 |
| cg03407747 | 17 | 6899364   | ALOX12    | 0.25  | 2.04E-05 | 2.56E-03 |
| cg07024458 | 16 | 56390600  | GNAO1     | 0.22  | 2.04E-05 | 2.56E-03 |
| cg09803262 | 7  | 96622608  | DLX6AS    | 0.28  | 2.04E-05 | 2.56E-03 |
| cg05361489 | 16 | 86610434  |           | 0.23  | 2.05E-05 | 2.56E-03 |
| cg10265690 | 5  | 170744027 |           | 0.24  | 2.05E-05 | 2.56E-03 |
| cg23767994 | 7  | 96621323  | DLX6AS    | 0.22  | 2.06E-05 | 2.57E-03 |
| cg09965996 | 16 | 56390429  | GNAO1     | 0.25  | 2.08E-05 | 2.59E-03 |
| cg01445809 | 20 | 48099468  | KCNB1     | 0.23  | 2.08E-05 | 2.59E-03 |
| cg24005685 | 4  | 111549880 | PITX2     | 0.29  | 2.08E-05 | 2.59E-03 |
| cg15540138 | 4  | 166795622 | TLL1      | 0.28  | 2.10E-05 | 2.61E-03 |
| cg20399509 | 21 | 47717575  | C21orf57  | 0.24  | 2.11E-05 | 2.62E-03 |
| cg26640601 | 6  | 10883866  |           | 0.24  | 2.14E-05 | 2.64E-03 |
| cg02179455 | 7  | 19183732  |           | 0.29  | 2.14E-05 | 2.64E-03 |
| cg16236672 | 13 | 23949979  | SACS      | 0.21  | 2.14E-05 | 2.64E-03 |
| cg13558371 | 9  | 126135610 | CRB2      | -0.22 | 2.14E-05 | 2.64E-03 |
| cg10601940 | 2  | 223159305 | PAX3      | 0.20  | 2.16E-05 | 2.66E-03 |
| cg21272465 | 2  | 239140296 | LOC151174 | 0.26  | 2.16E-05 | 2.66E-03 |
| cg00738309 | 13 | 114748624 | RASA3     | -0.24 | 2.16E-05 | 2.66E-03 |
| cg22451910 | 7  | 100701852 | MUC17     | 0.20  | 2.16E-05 | 2.66E-03 |
| cg12788467 | 17 | 36105335  | HNF1B     | 0.22  | 2.17E-05 | 2.66E-03 |
| cg15899032 | 7  | 98547122  | TRRAP     | -0.24 | 2.17E-05 | 2.66E-03 |
| cg22595460 | 2  | 119617128 |           | 0.20  | 2.17E-05 | 2.67E-03 |
| cg05848545 | 17 | 29335528  |           | 0.23  | 2.18E-05 | 2.67E-03 |
| cg18698767 | 10 | 128213855 |           | -0.23 | 2.18E-05 | 2.67E-03 |
| cg06829968 | 15 | 53076235  | ONECUT1   | 0.23  | 2.19E-05 | 2.68E-03 |
| cg27313642 | 8  | 65291542  | MIR124-2  | 0.22  | 2.19E-05 | 2.68E-03 |
| cg27149471 | 11 | 56043514  | OR5T1     | -0.21 | 2.19E-05 | 2.68E-03 |
| cg24205065 | 11 | 50238107  |           | -0.25 | 2.20E-05 | 2.69E-03 |
| cg00161955 | 8  | 82608057  | SLC10A5   | -0.21 | 2.21E-05 | 2.69E-03 |
| cg17922359 | 4  | 13530923  |           | 0.28  | 2.21E-05 | 2.69E-03 |
| cg01609275 | 14 | 37049091  |           | 0.24  | 2.21E-05 | 2.69E-03 |
| cg02387679 | 5  | 75699865  | IQGAP2    | 0.23  | 2.22E-05 | 2.69E-03 |
| cg22383888 | 3  | 27764816  | EOMES     | 0.29  | 2.22E-05 | 2.70E-03 |
| cg17802949 | 22 | 40060891  | CACNA1I   | 0.20  | 2.22E-05 | 2.70E-03 |
| cg18543610 | 13 | 100627929 |           | 0.27  | 2.23E-05 | 2.70E-03 |
| cg03783663 | 13 | 70682628  | KLHL1     | 0.21  | 2.23E-05 | 2.71E-03 |
| cg24690731 | 8  | 10589093  | SOX7      | 0.24  | 2.23E-05 | 2.71E-03 |
| cg00508975 | 3  | 26666151  | LRRC3B    | 0.20  | 2.24E-05 | 2.71E-03 |
| cg05224741 | 6  | 10422322  |           | 0.33  | 2.24E-05 | 2.71E-03 |
| cg09714919 | 16 | 85981947  |           | 0.21  | 2.25E-05 | 2.72E-03 |
| cg18002116 | 13 | 53419596  | PCDH8     | 0.26  | 2.25E-05 | 2.72E-03 |
| cg05873146 | 17 | 29335669  |           | 0.27  | 2.25E-05 | 2.72E-03 |
| cg21300072 | 12 | 12850082  | GPR19     | 0.28  | 2.25E-05 | 2.72E-03 |
| cg18105665 | 14 | 93257417  |           | -0.23 | 2.26E-05 | 2.72E-03 |
| cg17824240 | 10 | 43892819  | HNRNPF    | 0.23  | 2.26E-05 | 2.73E-03 |
| cg18930910 | 6  | 30039151  | RNF39     | 0.22  | 2.26E-05 | 2.73E-03 |
| cg00965023 | 19 | 11785188  | ZNF833    | 0.21  | 2.27E-05 | 2.73E-03 |
| cg15437053 | 19 | 34311123  |           | 0.26  | 2.27E-05 | 2.74E-03 |
| cg14142965 | 12 | 104609432 | TXNRD1    | 0.26  | 2.28E-05 | 2.74E-03 |
| cg13826247 | 12 | 54424203  | HOXC4     | 0.24  | 2.28E-05 | 2.74E-03 |
| cg10180281 | 7  | 26897714  | SKAP2     | 0.23  | 2.30E-05 | 2.76E-03 |
| cg01308409 | 13 | 33591937  | KL        | 0.22  | 2.30E-05 | 2.76E-03 |
| cg03019360 | 16 | 61330754  |           | -0.21 | 2.30E-05 | 2.76E-03 |
| cg03293507 | 6  | 30038975  | RNF39     | 0.25  | 2.31E-05 | 2.76E-03 |
| cg10297473 | 16 | 51184152  | SALL1     | 0.20  | 2.31E-05 | 2.77E-03 |
| cg02892898 | 1  | 53169070  |           | 0.22  | 2.31E-05 | 2.77E-03 |
| cg22282405 | 6  | 50810682  | TFAP2B    | 0.27  | 2.32E-05 | 2.77E-03 |
| cg01550307 | 17 | 36204463  | LOC284100 | 0.21  | 2.32E-05 | 2.77E-03 |
| cg22697853 | 1  | 147737207 |           | 0.22  | 2.33E-05 | 2.78E-03 |
| cg07217341 | 2  | 3128823   |           | -0.22 | 2.33E-05 | 2.78E-03 |
| cg02211735 | 11 | 5142602   | OR52A4    | -0.23 | 2.33E-05 | 2.78E-03 |

|            |    |           |           |       |          |          |
|------------|----|-----------|-----------|-------|----------|----------|
| cg14684709 | 13 | 100547249 | CLYBL     | 0.26  | 2.34E-05 | 2.79E-03 |
| cg20691140 | 2  | 137522667 |           | 0.22  | 2.34E-05 | 2.79E-03 |
| cg17800654 | 1  | 50888590  | DMRTA2    | 0.28  | 2.34E-05 | 2.79E-03 |
| cg17755352 | 9  | 127215714 | GPR144    | 0.24  | 2.34E-05 | 2.79E-03 |
| cg04451736 | 5  | 10333413  |           | 0.26  | 2.35E-05 | 2.79E-03 |
| cg09784335 | 4  | 41875193  |           | 0.20  | 2.36E-05 | 2.81E-03 |
| cg09032310 | 5  | 141262801 |           | 0.23  | 2.36E-05 | 2.81E-03 |
| cg08802841 | 12 | 89748726  |           | 0.22  | 2.37E-05 | 2.81E-03 |
| cg12124386 | 1  | 190444776 | FAM5C     | 0.28  | 2.37E-05 | 2.81E-03 |
| cg24757553 | 7  | 27127501  |           | 0.23  | 2.37E-05 | 2.81E-03 |
| cg19451167 | 7  | 96655981  |           | 0.20  | 2.38E-05 | 2.82E-03 |
| cg16705744 | 3  | 27756039  |           | 0.25  | 2.38E-05 | 2.82E-03 |
| cg03477792 | 4  | 77819574  | ANKRD56   | 0.22  | 2.39E-05 | 2.82E-03 |
| cg18786593 | 2  | 157178731 |           | 0.28  | 2.41E-05 | 2.84E-03 |
| cg02876925 | 4  | 77869590  | Sep-11    | 0.20  | 2.41E-05 | 2.85E-03 |
| cg01257975 | 22 | 40058706  | CACNA1I   | 0.21  | 2.41E-05 | 2.85E-03 |
| cg17718302 | 6  | 27858637  | HIST1H3J  | 0.27  | 2.41E-05 | 2.85E-03 |
| cg04468543 | 5  | 77268331  |           | 0.22  | 2.42E-05 | 2.85E-03 |
| cg26330518 | 8  | 24770342  | NEFM      | 0.27  | 2.42E-05 | 2.85E-03 |
| cg05825244 | 20 | 2730488   | EBF4      | 0.29  | 2.42E-05 | 2.85E-03 |
| cg25761793 | 1  | 63782639  |           | 0.23  | 2.42E-05 | 2.85E-03 |
| cg03639749 | 12 | 133562363 | ZNF26     | -0.23 | 2.43E-05 | 2.86E-03 |
| cg18031675 | 7  | 29602763  | PRR15     | 0.21  | 2.44E-05 | 2.87E-03 |
| cg22764436 | 2  | 223168727 | CCDC140   | 0.22  | 2.45E-05 | 2.88E-03 |
| cg05649108 | 18 | 34854722  | BRUNOL4   | 0.31  | 2.46E-05 | 2.88E-03 |
| cg03711485 | 10 | 101296036 | NKX2-3    | 0.25  | 2.47E-05 | 2.89E-03 |
| cg26719629 | 11 | 2163299   | IGF2AS    | 0.20  | 2.47E-05 | 2.90E-03 |
| cg03341413 | 15 | 68125566  | LBXCOR1   | 0.25  | 2.49E-05 | 2.91E-03 |
| cg26800915 | 11 | 5324199   | OR51B4    | -0.26 | 2.50E-05 | 2.92E-03 |
| cg12041387 | 7  | 96650171  | DLX5      | 0.25  | 2.51E-05 | 2.93E-03 |
| cg00700485 | 20 | 44098223  | WFDC2     | 0.21  | 2.51E-05 | 2.93E-03 |
| cg07888234 | 18 | 59992252  | TNFRSF11A | 0.20  | 2.51E-05 | 2.93E-03 |
| cg05690394 | 14 | 73958888  | HEATR4    | 0.28  | 2.53E-05 | 2.94E-03 |
| cg15244786 | 12 | 54446279  | HOXC4     | 0.24  | 2.53E-05 | 2.94E-03 |
| cg04436818 | 10 | 102589545 | PAX2      | 0.28  | 2.53E-05 | 2.94E-03 |
| cg09935994 | 2  | 235406540 | ARL4C     | 0.20  | 2.53E-05 | 2.95E-03 |
| cg26960333 | 13 | 92051705  | GPC5      | 0.21  | 2.54E-05 | 2.95E-03 |
| cg24385632 | 11 | 16838615  | PLEKHA7   | -0.21 | 2.55E-05 | 2.96E-03 |
| cg26825532 | 3  | 62355103  |           | 0.21  | 2.55E-05 | 2.96E-03 |
| cg05328547 | 7  | 19185139  | FERD3L    | 0.28  | 2.58E-05 | 2.99E-03 |
| cg10572355 | 1  | 119549145 |           | 0.26  | 2.58E-05 | 2.99E-03 |
| cg14430542 | 9  | 79637457  |           | 0.21  | 2.59E-05 | 2.99E-03 |
| cg03982801 | 7  | 27168688  | HOXA4     | 0.20  | 2.59E-05 | 2.99E-03 |
| cg12736877 | 6  | 30039010  | RNF39     | 0.28  | 2.59E-05 | 2.99E-03 |
| cg09236434 | 2  | 99553642  | C2orf55   | 0.24  | 2.59E-05 | 2.99E-03 |
| cg22609784 | 4  | 4863678   | MSX1      | 0.23  | 2.59E-05 | 2.99E-03 |
| cg25756406 | 10 | 134597884 |           | 0.21  | 2.60E-05 | 2.99E-03 |
| cg05592245 | 10 | 65280473  | REEP3     | 0.22  | 2.60E-05 | 3.00E-03 |
| cg07681935 | 4  | 174452461 | NBLA00301 | 0.30  | 2.61E-05 | 3.00E-03 |
| cg16559708 | 1  | 7130495   | CAMTA1    | 0.21  | 2.62E-05 | 3.01E-03 |
| cg02998620 | 2  | 223171473 |           | 0.24  | 2.63E-05 | 3.02E-03 |
| cg07882836 | 6  | 43276573  | CRIP3     | 0.26  | 2.63E-05 | 3.02E-03 |
| cg00170003 | 6  | 108490371 | NR2E1     | 0.28  | 2.64E-05 | 3.03E-03 |
| cg02743713 | 2  | 157178647 |           | 0.26  | 2.64E-05 | 3.03E-03 |
| cg16495212 | 15 | 83317306  | CPEB1     | 0.21  | 2.65E-05 | 3.03E-03 |
| cg09164580 | 8  | 97157878  | GDF6      | 0.22  | 2.65E-05 | 3.03E-03 |
| cg19990785 | 11 | 67232403  | TMEM134   | 0.22  | 2.65E-05 | 3.04E-03 |
| cg00213052 | 18 | 77397557  |           | 0.20  | 2.66E-05 | 3.04E-03 |
| cg19929355 | 4  | 48272059  | TEC       | 0.24  | 2.66E-05 | 3.04E-03 |
| cg05380916 | 3  | 179437788 | USP13     | -0.22 | 2.67E-05 | 3.04E-03 |
| cg00215432 | 2  | 219866437 | MIR375    | 0.30  | 2.67E-05 | 3.04E-03 |
| cg19674065 | 4  | 26858928  |           | 0.20  | 2.67E-05 | 3.04E-03 |
| cg23429510 | 2  | 176936942 |           | 0.22  | 2.67E-05 | 3.04E-03 |
| cg14429204 | 1  | 16553327  |           | 0.22  | 2.67E-05 | 3.04E-03 |
| cg05036656 | 4  | 41875470  |           | 0.27  | 2.68E-05 | 3.05E-03 |
| cg22512438 | 3  | 129693489 | TRH       | 0.27  | 2.69E-05 | 3.06E-03 |

|            |    |           |           |       |          |          |
|------------|----|-----------|-----------|-------|----------|----------|
| cg22533683 | 17 | 29887049  | MIR193A   | 0.23  | 2.69E-05 | 3.06E-03 |
| cg16345311 | 16 | 26505221  |           | -0.21 | 2.70E-05 | 3.06E-03 |
| cg22735222 | 10 | 101295724 | NKX2-3    | 0.28  | 2.70E-05 | 3.06E-03 |
| cg13036381 | 3  | 159942495 | LOC401097 | 0.20  | 2.70E-05 | 3.06E-03 |
| cg06740893 | 1  | 12251869  | TNFRSF1B  | -0.21 | 2.71E-05 | 3.07E-03 |
| cg01049674 | 19 | 41073425  | SPTBN4    | 0.21  | 2.72E-05 | 3.08E-03 |
| cg16137147 | 1  | 221067896 |           | 0.29  | 2.73E-05 | 3.09E-03 |
| cg15262505 | 7  | 1428806   |           | 0.20  | 2.74E-05 | 3.09E-03 |
| cg21146503 | 11 | 20178677  | DBX1      | 0.26  | 2.74E-05 | 3.09E-03 |
| cg13219590 | 14 | 97492191  |           | 0.21  | 2.74E-05 | 3.09E-03 |
| cg04917276 | 17 | 36104585  | HNF1B     | 0.22  | 2.75E-05 | 3.09E-03 |
| cg09317554 | 4  | 151505084 | LRBA      | 0.24  | 2.75E-05 | 3.09E-03 |
| cg20603637 | 8  | 42010142  | AP3M2     | 0.25  | 2.76E-05 | 3.11E-03 |
| cg12848808 | 15 | 68125599  | LBXCOR1   | 0.27  | 2.77E-05 | 3.11E-03 |
| cg00142402 | 17 | 75956190  |           | 0.22  | 2.78E-05 | 3.11E-03 |
| cg16991515 | 6  | 27107019  | HIST1H2BK | 0.30  | 2.78E-05 | 3.11E-03 |
| cg15611809 | 5  | 67483833  |           | -0.20 | 2.79E-05 | 3.12E-03 |
| cg04322572 | 10 | 43447618  |           | 0.20  | 2.80E-05 | 3.13E-03 |
| cg09175843 | 2  | 70313417  | PCBP1     | 0.26  | 2.80E-05 | 3.13E-03 |
| cg01644927 | 6  | 88877413  |           | 0.22  | 2.80E-05 | 3.13E-03 |
| cg20815297 | 4  | 13541663  |           | 0.21  | 2.80E-05 | 3.13E-03 |
| cg25032595 | 13 | 96204978  | CLDN10    | 0.30  | 2.81E-05 | 3.13E-03 |
| cg12262378 | 17 | 6899522   | ALOX12    | 0.24  | 2.82E-05 | 3.14E-03 |
| cg27631599 | 1  | 1108820   | TTL10     | 0.21  | 2.83E-05 | 3.15E-03 |
| cg10239163 | 2  | 25527366  | DNMT3A    | 0.22  | 2.84E-05 | 3.15E-03 |
| cg01757168 | 3  | 128215565 |           | 0.27  | 2.84E-05 | 3.15E-03 |
| cg07362328 | 1  | 50886393  | DMRTA2    | 0.21  | 2.84E-05 | 3.15E-03 |
| cg27615095 | 12 | 63049980  | PPM1H     | -0.22 | 2.85E-05 | 3.15E-03 |
| cg18294646 | 5  | 33937876  | RXFP3     | 0.20  | 2.87E-05 | 3.17E-03 |
| cg12258228 | 12 | 88866007  |           | -0.21 | 2.87E-05 | 3.17E-03 |
| cg23291886 | 4  | 174440681 |           | 0.26  | 2.87E-05 | 3.17E-03 |
| cg11221524 | 1  | 84969091  | GNG5      | 0.20  | 2.88E-05 | 3.17E-03 |
| cg20704772 | 4  | 53617882  |           | 0.23  | 2.88E-05 | 3.17E-03 |
| cg06014401 | 3  | 27765232  | EOMES     | 0.30  | 2.89E-05 | 3.18E-03 |
| cg22512163 | 5  | 73205678  | RGNEF     | 0.23  | 2.90E-05 | 3.19E-03 |
| cg08823110 | 10 | 102589840 |           | 0.25  | 2.90E-05 | 3.19E-03 |
| cg23136139 | 10 | 43697918  | RASGEF1A  | 0.22  | 2.91E-05 | 3.20E-03 |
| cg19559537 | 17 | 36204489  | LOC284100 | 0.25  | 2.91E-05 | 3.20E-03 |
| cg16886987 | 21 | 38378634  | DSCR6     | 0.26  | 2.91E-05 | 3.20E-03 |
| cg24967701 | 17 | 37894165  | GRB7      | 0.24  | 2.92E-05 | 3.20E-03 |
| cg16611654 | 15 | 68113386  |           | 0.24  | 2.93E-05 | 3.21E-03 |
| cg26465391 | 19 | 58220773  | ZNF154    | 0.27  | 2.93E-05 | 3.21E-03 |
| cg04153838 | 12 | 115132015 |           | 0.22  | 2.94E-05 | 3.22E-03 |
| cg21964551 | 1  | 201368791 | LAD1      | 0.24  | 2.96E-05 | 3.23E-03 |
| cg05722981 | 4  | 111533509 |           | 0.26  | 2.96E-05 | 3.24E-03 |
| cg18770231 | 1  | 102119095 |           | 0.22  | 2.96E-05 | 3.24E-03 |
| cg15591930 | 8  | 61765391  | CHD7      | -0.25 | 2.97E-05 | 3.24E-03 |
| cg10276465 | 22 | 42470494  | FAM109B   | 0.24  | 2.98E-05 | 3.24E-03 |
| cg21697851 | 21 | 38076869  | SIM2      | 0.27  | 2.98E-05 | 3.25E-03 |
| cg25266629 | 10 | 102894148 | TLX1      | 0.28  | 2.98E-05 | 3.25E-03 |
| cg05185040 | 8  | 41425077  |           | 0.21  | 2.99E-05 | 3.25E-03 |
| cg17535691 | 10 | 102881324 | TLX1NB    | 0.30  | 2.99E-05 | 3.25E-03 |
| cg07197092 | 2  | 79008089  |           | -0.23 | 2.99E-05 | 3.25E-03 |
| cg12352124 | 15 | 53097840  |           | 0.25  | 3.00E-05 | 3.26E-03 |
| cg00254681 | 6  | 32118457  | PRRT1     | 0.23  | 3.01E-05 | 3.26E-03 |
| cg07475394 | 17 | 79466438  |           | -0.21 | 3.01E-05 | 3.26E-03 |
| cg11391335 | 1  | 119521928 | TBX15     | 0.25  | 3.01E-05 | 3.26E-03 |
| cg22465516 | 17 | 54912286  | DGKE      | 0.25  | 3.04E-05 | 3.28E-03 |
| cg01804925 | 6  | 27107588  | HIST1H2BK | 0.29  | 3.05E-05 | 3.29E-03 |
| cg08681924 | 3  | 62359924  | FEZF2     | 0.28  | 3.05E-05 | 3.29E-03 |
| cg05573844 | 12 | 54354590  |           | 0.24  | 3.07E-05 | 3.31E-03 |
| cg00434010 | 6  | 100903691 | SIM1      | 0.25  | 3.08E-05 | 3.32E-03 |
| cg17031543 | 4  | 52918471  | SPATA18   | 0.22  | 3.10E-05 | 3.33E-03 |
| cg20390613 | 1  | 12678355  | DHRS3     | 0.23  | 3.10E-05 | 3.33E-03 |
| cg24008908 | 1  | 19615453  | AKR7A3    | 0.20  | 3.11E-05 | 3.33E-03 |
| cg25386707 | 10 | 131748428 | EBF3      | 0.24  | 3.14E-05 | 3.36E-03 |



|            |    |           |              |       |          |          |
|------------|----|-----------|--------------|-------|----------|----------|
| cg03155112 | 7  | 47556928  | TNS3         | -0.23 | 3.15E-05 | 3.37E-03 |
| cg09766710 | 1  | 247767976 | OR2G3        | -0.24 | 3.16E-05 | 3.38E-03 |
| cg13783434 | 13 | 100610616 |              | 0.21  | 3.16E-05 | 3.38E-03 |
| cg12541454 | 4  | 174437915 |              | 0.24  | 3.17E-05 | 3.38E-03 |
| cg19849728 | 4  | 111536767 |              | 0.24  | 3.17E-05 | 3.39E-03 |
| cg19605788 | 19 | 40729386  | CNTD2        | 0.23  | 3.18E-05 | 3.39E-03 |
| cg13783725 | 6  | 117589651 | VGLL2        | 0.22  | 3.18E-05 | 3.39E-03 |
| cg05055001 | 14 | 30649039  |              | -0.23 | 3.18E-05 | 3.39E-03 |
| cg03614916 | 18 | 22007271  | IMPACT       | 0.23  | 3.20E-05 | 3.41E-03 |
| cg01085362 | 19 | 31848310  |              | 0.25  | 3.21E-05 | 3.41E-03 |
| cg25610702 | 6  | 43276744  | CRIP3        | 0.20  | 3.21E-05 | 3.42E-03 |
| cg01709766 | 11 | 5640318   | TRIM6-TRIM34 | -0.20 | 3.22E-05 | 3.42E-03 |
| cg10095226 | 1  | 201368738 | LAD1         | 0.26  | 3.22E-05 | 3.42E-03 |
| cg10972873 | 1  | 200007592 | NR5A2        | 0.21  | 3.22E-05 | 3.42E-03 |
| cg02079831 | 12 | 58014709  | SLC26A10     | 0.20  | 3.23E-05 | 3.42E-03 |
| cg02919615 | 19 | 1295656   | EFNA2        | -0.21 | 3.23E-05 | 3.42E-03 |
| cg20885782 | 4  | 41875606  |              | 0.26  | 3.24E-05 | 3.43E-03 |
| cg18920097 | 15 | 35045695  | GJD2         | 0.23  | 3.24E-05 | 3.43E-03 |
| cg10954469 | 2  | 71115370  |              | 0.27  | 3.24E-05 | 3.43E-03 |
| cg02466602 | 17 | 16290349  |              | 0.22  | 3.25E-05 | 3.43E-03 |
| cg23490887 | 6  | 117584596 |              | 0.25  | 3.25E-05 | 3.44E-03 |
| cg24426405 | 7  | 16844852  | AGR2         | -0.22 | 3.26E-05 | 3.44E-03 |
| cg19179099 | 10 | 106390667 |              | -0.25 | 3.26E-05 | 3.44E-03 |
| cg11528849 | 2  | 182542901 | NEUROD1      | 0.29  | 3.26E-05 | 3.44E-03 |
| cg00743094 | 13 | 100547968 | CLYBL        | 0.30  | 3.26E-05 | 3.44E-03 |
| cg11107212 | 7  | 98100224  |              | 0.25  | 3.26E-05 | 3.44E-03 |
| cg02471153 | 8  | 99440331  | KCNS2        | 0.21  | 3.28E-05 | 3.45E-03 |
| cg24851854 | 1  | 59042275  | TACSTD2      | 0.26  | 3.28E-05 | 3.45E-03 |
| cg21781979 | 13 | 100547292 | CLYBL        | 0.30  | 3.28E-05 | 3.45E-03 |
| cg22724854 | 11 | 55737072  | OR10AG1      | -0.20 | 3.29E-05 | 3.46E-03 |
| cg05952572 | 11 | 72295425  | PDE2A        | 0.24  | 3.29E-05 | 3.46E-03 |
| cg17199800 | 7  | 96632777  | DLX6AS       | 0.25  | 3.30E-05 | 3.46E-03 |
| cg08520746 | 2  | 172945932 |              | 0.23  | 3.30E-05 | 3.46E-03 |
| cg26251506 | 7  | 96642163  | DLX6AS       | 0.25  | 3.34E-05 | 3.50E-03 |
| cg02537491 | 12 | 54354162  |              | 0.22  | 3.35E-05 | 3.50E-03 |
| cg21367972 | 7  | 116166824 | CAV1         | 0.21  | 3.35E-05 | 3.50E-03 |
| cg12464395 | 11 | 41644475  |              | -0.20 | 3.36E-05 | 3.51E-03 |
| cg10243196 | 19 | 23945996  | RPSAP58      | 0.20  | 3.36E-05 | 3.51E-03 |
| cg04502985 | 5  | 77268452  |              | 0.26  | 3.38E-05 | 3.52E-03 |
| cg00860379 | 15 | 53097822  |              | 0.24  | 3.40E-05 | 3.52E-03 |
| cg06764239 | 1  | 119544772 |              | 0.23  | 3.40E-05 | 3.53E-03 |
| cg19861741 | 5  | 170742608 |              | 0.25  | 3.41E-05 | 3.53E-03 |
| cg26330116 | 15 | 37173000  | LOC145845    | 0.26  | 3.41E-05 | 3.53E-03 |
| cg27053299 | 13 | 100548780 | CLYBL        | 0.29  | 3.41E-05 | 3.53E-03 |
| cg26772540 | 19 | 11784672  | ZNF833       | 0.20  | 3.43E-05 | 3.55E-03 |
| cg05282518 | 14 | 20344920  | OR4K2        | 0.22  | 3.43E-05 | 3.55E-03 |
| cg19854915 | 3  | 27770995  |              | 0.24  | 3.45E-05 | 3.56E-03 |
| cg06088918 | 3  | 27755600  |              | 0.27  | 3.45E-05 | 3.56E-03 |
| cg02441618 | 17 | 40936570  | WNK4         | 0.21  | 3.45E-05 | 3.56E-03 |
| cg26494929 | 16 | 3017495   | KREMEN2      | 0.21  | 3.48E-05 | 3.58E-03 |
| cg01214340 | 13 | 50070499  | PHF11        | 0.21  | 3.49E-05 | 3.59E-03 |
| cg25707676 | 7  | 96643539  | DLX6AS       | 0.21  | 3.49E-05 | 3.59E-03 |
| cg16027343 | 5  | 180632948 | TRIM7        | 0.24  | 3.49E-05 | 3.59E-03 |
| cg15367453 | 2  | 63287288  |              | 0.27  | 3.50E-05 | 3.60E-03 |
| cg25819275 | 1  | 248684766 | OR2G6        | -0.23 | 3.51E-05 | 3.60E-03 |
| cg00350835 | 11 | 16838596  | PLEKHA7      | -0.22 | 3.51E-05 | 3.60E-03 |
| cg05854694 | 14 | 61123243  |              | 0.25  | 3.52E-05 | 3.60E-03 |
| cg10227331 | 1  | 8181647   |              | -0.20 | 3.52E-05 | 3.61E-03 |
| cg13683361 | 9  | 103793011 | LPPR1        | 0.21  | 3.53E-05 | 3.61E-03 |
| cg00346208 | 1  | 20669905  | VWA5B1       | 0.23  | 3.54E-05 | 3.62E-03 |
| cg08160331 | 11 | 75140865  | KLHL35       | 0.20  | 3.55E-05 | 3.63E-03 |
| cg12440105 | 2  | 239756128 | TWIST2       | 0.21  | 3.55E-05 | 3.63E-03 |
| cg15638414 | 19 | 31847893  |              | 0.24  | 3.56E-05 | 3.63E-03 |
| cg15214183 | 11 | 67232269  | TMEM134      | 0.24  | 3.57E-05 | 3.64E-03 |
| cg23207676 | 19 | 41073603  | SPTBN4       | 0.25  | 3.57E-05 | 3.64E-03 |
| cg02838178 | 1  | 201368613 | LAD1         | 0.23  | 3.58E-05 | 3.64E-03 |

|            |    |           |          |       |          |          |
|------------|----|-----------|----------|-------|----------|----------|
| cg00169792 | 20 | 50418554  | SALL4    | 0.24  | 3.58E-05 | 3.64E-03 |
| cg25386676 | 5  | 172175721 |          | 0.25  | 3.58E-05 | 3.64E-03 |
| cg24894584 | 12 | 1772230   |          | 0.20  | 3.59E-05 | 3.65E-03 |
| cg10643691 | 8  | 95246514  |          | 0.25  | 3.59E-05 | 3.65E-03 |
| cg20611276 | 6  | 133561866 | EYA4     | 0.20  | 3.59E-05 | 3.65E-03 |
| cg05787790 | 16 | 86550238  |          | 0.21  | 3.60E-05 | 3.65E-03 |
| cg02861380 | 1  | 75596758  | LHX8     | 0.25  | 3.62E-05 | 3.67E-03 |
| cg09802835 | 11 | 71952131  | PHOX2A   | 0.27  | 3.64E-05 | 3.68E-03 |
| cg12215739 | 2  | 177014966 | HOXD4    | 0.25  | 3.65E-05 | 3.69E-03 |
| cg07250758 | 11 | 61049251  | VWCE     | 0.23  | 3.66E-05 | 3.70E-03 |
| cg26930448 | 1  | 218337485 |          | 0.23  | 3.67E-05 | 3.71E-03 |
| cg08491487 | 6  | 30039130  | RNF39    | 0.27  | 3.67E-05 | 3.71E-03 |
| cg00566759 | 18 | 28682345  | DSC2     | 0.23  | 3.68E-05 | 3.71E-03 |
| cg18857062 | 6  | 43276478  | CRIP3    | 0.22  | 3.68E-05 | 3.71E-03 |
| cg17101450 | 10 | 102900365 |          | 0.30  | 3.69E-05 | 3.71E-03 |
| cg16644023 | 7  | 27154845  | HOXA3    | 0.21  | 3.70E-05 | 3.71E-03 |
| cg02512920 | 10 | 23460457  |          | 0.24  | 3.70E-05 | 3.71E-03 |
| cg13596049 | 18 | 30051538  | FAM59A   | 0.21  | 3.71E-05 | 3.72E-03 |
| cg04406454 | 6  | 10398494  | TFAP2A   | 0.20  | 3.71E-05 | 3.72E-03 |
| cg20343048 | 21 | 36041527  | CLIC6    | 0.23  | 3.72E-05 | 3.73E-03 |
| cg11028201 | 4  | 41867562  |          | 0.29  | 3.72E-05 | 3.73E-03 |
| cg20072171 | 3  | 62356962  | FEZF2    | 0.29  | 3.73E-05 | 3.74E-03 |
| cg00292701 | 4  | 10463590  |          | 0.22  | 3.74E-05 | 3.74E-03 |
| cg20099830 | 12 | 114842031 | TBX5     | 0.23  | 3.74E-05 | 3.74E-03 |
| cg19685491 | 12 | 2800278   | CACNA1C  | 0.22  | 3.76E-05 | 3.75E-03 |
| cg03477112 | 10 | 125034571 |          | 0.21  | 3.76E-05 | 3.75E-03 |
| cg05068866 | 3  | 66633374  |          | -0.21 | 3.77E-05 | 3.75E-03 |
| cg04674755 | 7  | 44643793  |          | -0.20 | 3.78E-05 | 3.77E-03 |
| cg09231171 | 16 | 49518414  |          | 0.25  | 3.79E-05 | 3.77E-03 |
| cg08648317 | 11 | 59807830  | PLAC1L   | -0.24 | 3.80E-05 | 3.78E-03 |
| cg20756891 | 5  | 170743951 |          | 0.26  | 3.81E-05 | 3.78E-03 |
| cg19416417 | 2  | 223290324 | SGPP2    | 0.23  | 3.82E-05 | 3.79E-03 |
| cg21201099 | 17 | 59482446  | TBX2     | 0.21  | 3.82E-05 | 3.79E-03 |
| cg10434261 | 1  | 156358059 |          | 0.22  | 3.83E-05 | 3.80E-03 |
| cg06355129 | 1  | 156646293 | NES      | 0.21  | 3.84E-05 | 3.80E-03 |
| cg12062220 | 15 | 53087232  |          | 0.25  | 3.85E-05 | 3.81E-03 |
| cg07416237 | 13 | 100548078 | CLYBL    | 0.24  | 3.85E-05 | 3.81E-03 |
| cg09591329 | 2  | 102388664 | MAP4K4   | -0.22 | 3.86E-05 | 3.82E-03 |
| cg11079129 | 5  | 172669916 |          | 0.23  | 3.87E-05 | 3.82E-03 |
| cg14161821 | 9  | 6955559   | KDM4C    | -0.22 | 3.89E-05 | 3.83E-03 |
| cg03953660 | 2  | 45179787  |          | 0.27  | 3.89E-05 | 3.83E-03 |
| cg18104354 | 10 | 106390703 |          | -0.22 | 3.89E-05 | 3.83E-03 |
| cg03052128 | 12 | 85671811  |          | 0.24  | 3.90E-05 | 3.84E-03 |
| cg21843594 | 22 | 30476285  | HORMAD2  | 0.25  | 3.90E-05 | 3.84E-03 |
| cg16108059 | 14 | 81421989  | TSHR     | 0.24  | 3.93E-05 | 3.86E-03 |
| cg20658918 | 2  | 131185698 |          | 0.22  | 3.95E-05 | 3.87E-03 |
| cg13230606 | 17 | 36105337  | HNF1B    | 0.22  | 3.98E-05 | 3.89E-03 |
| cg09701702 | 6  | 100915002 |          | 0.25  | 3.98E-05 | 3.89E-03 |
| cg03217995 | 7  | 27203430  | HOXA9    | -0.27 | 3.99E-05 | 3.90E-03 |
| cg04028695 | 10 | 80008319  |          | -0.21 | 3.99E-05 | 3.90E-03 |
| cg10138970 | 2  | 223172052 |          | 0.24  | 4.00E-05 | 3.90E-03 |
| cg08717880 | 2  | 177014849 | HOXD4    | 0.22  | 4.00E-05 | 3.90E-03 |
| cg08973839 | 11 | 49862012  |          | -0.21 | 4.00E-05 | 3.90E-03 |
| cg03805618 | 2  | 175198664 | SP9      | 0.26  | 4.02E-05 | 3.91E-03 |
| cg21046967 | 17 | 37762455  | NEUROD2  | 0.26  | 4.08E-05 | 3.96E-03 |
| cg26987660 | 11 | 71952431  | PHOX2A   | 0.24  | 4.08E-05 | 3.96E-03 |
| cg10043037 | 7  | 19185407  | FERD3L   | 0.27  | 4.09E-05 | 3.96E-03 |
| cg01244342 | 6  | 32709470  | HLA-DQA2 | -0.24 | 4.11E-05 | 3.97E-03 |
| cg15209808 | 22 | 30476254  | HORMAD2  | 0.27  | 4.12E-05 | 3.98E-03 |
| cg21188820 | 3  | 27765546  |          | 0.28  | 4.12E-05 | 3.98E-03 |
| cg20065569 | 14 | 73958280  | HEATR4   | 0.26  | 4.14E-05 | 4.00E-03 |
| cg23639692 | 7  | 27175152  |          | 0.20  | 4.14E-05 | 4.00E-03 |
| cg01926238 | 6  | 117584715 |          | 0.25  | 4.14E-05 | 4.00E-03 |
| cg10188897 | 17 | 42392436  | RUNDC3A  | 0.24  | 4.14E-05 | 4.00E-03 |
| cg17594860 | 1  | 19615358  | AKR7A3   | 0.23  | 4.15E-05 | 4.00E-03 |
| cg00421848 | 21 | 35832164  | KCNE1    | 0.22  | 4.16E-05 | 4.00E-03 |

|            |    |           |              |       |          |          |
|------------|----|-----------|--------------|-------|----------|----------|
| cg16582419 | 6  | 30038998  | RNF39        | 0.23  | 4.16E-05 | 4.00E-03 |
| cg12689806 | 1  | 248042285 | TRIM58       | -0.24 | 4.16E-05 | 4.00E-03 |
| cg22345576 | 19 | 36000517  | DMKN         | 0.22  | 4.16E-05 | 4.00E-03 |
| cg08638184 | 7  | 19183563  |              | 0.25  | 4.17E-05 | 4.01E-03 |
| cg03540794 | 5  | 2112109   |              | -0.25 | 4.17E-05 | 4.01E-03 |
| cg19925204 | 10 | 119307692 | EMX2         | 0.26  | 4.17E-05 | 4.01E-03 |
| cg11861970 | 5  | 67484008  |              | -0.24 | 4.18E-05 | 4.01E-03 |
| cg02736908 | 17 | 29887376  |              | 0.21  | 4.19E-05 | 4.02E-03 |
| cg08862373 | 1  | 17478571  |              | -0.21 | 4.19E-05 | 4.02E-03 |
| cg10348193 | 7  | 150020240 | LRRC61       | 0.21  | 4.20E-05 | 4.03E-03 |
| cg15359163 | 5  | 122429178 | PRDM6        | 0.26  | 4.20E-05 | 4.03E-03 |
| cg22275864 | 8  | 37822562  | ADRB3        | 0.22  | 4.21E-05 | 4.03E-03 |
| cg10106804 | 1  | 35258594  | GJA4         | 0.25  | 4.21E-05 | 4.03E-03 |
| cg19666287 | 13 | 45945197  | LOC100190939 | 0.21  | 4.22E-05 | 4.03E-03 |
| cg01250603 | 10 | 122709029 |              | 0.24  | 4.23E-05 | 4.04E-03 |
| cg22686881 | 5  | 170737255 | TLX3         | 0.22  | 4.23E-05 | 4.04E-03 |
| cg15087376 | 3  | 149113539 |              | -0.21 | 4.24E-05 | 4.04E-03 |
| cg05492170 | 4  | 111536341 |              | 0.21  | 4.25E-05 | 4.04E-03 |
| cg17803993 | 3  | 71276214  | FOXP1        | -0.20 | 4.26E-05 | 4.05E-03 |
| cg00928397 | 2  | 175198952 | SP9          | 0.21  | 4.26E-05 | 4.05E-03 |
| cg06195987 | 7  | 98100169  |              | 0.25  | 4.27E-05 | 4.06E-03 |
| cg02530022 | 7  | 96642708  | DLX6AS       | 0.25  | 4.28E-05 | 4.06E-03 |
| cg22272282 | 6  | 27107670  | HIST1H2BK    | 0.30  | 4.28E-05 | 4.06E-03 |
| cg05845757 | 1  | 36039885  | TFAP2E       | 0.23  | 4.28E-05 | 4.06E-03 |
| cg18135771 | 3  | 13323959  |              | 0.25  | 4.28E-05 | 4.06E-03 |
| cg01817364 | 5  | 43037411  |              | 0.25  | 4.28E-05 | 4.06E-03 |
| cg27151303 | 7  | 27184821  |              | 0.22  | 4.29E-05 | 4.06E-03 |
| cg13019143 | 7  | 96633060  | DLX6AS       | 0.23  | 4.29E-05 | 4.06E-03 |
| cg16640855 | 2  | 182543233 | NEUROD1      | 0.29  | 4.31E-05 | 4.07E-03 |
| cg13354988 | 2  | 263656    | ACP1         | 0.27  | 4.31E-05 | 4.07E-03 |
| cg09682128 | 13 | 100613240 |              | 0.25  | 4.32E-05 | 4.08E-03 |
| cg22606869 | 12 | 49658703  | TUBA1C       | 0.25  | 4.33E-05 | 4.08E-03 |
| cg07598580 | 1  | 86620525  | COL24A1      | 0.21  | 4.33E-05 | 4.08E-03 |
| cg21322654 | 7  | 107301048 | SLC26A4      | 0.22  | 4.34E-05 | 4.09E-03 |
| cg21495139 | 14 | 105070749 | TMEM179      | 0.21  | 4.35E-05 | 4.09E-03 |
| cg13768290 | 2  | 63285491  |              | 0.21  | 4.35E-05 | 4.09E-03 |
| cg09486778 | 2  | 223169609 | CCDC140      | 0.25  | 4.36E-05 | 4.10E-03 |
| cg13637269 | 19 | 22697330  |              | -0.22 | 4.36E-05 | 4.10E-03 |
| cg20643952 | 12 | 54398809  |              | 0.22  | 4.36E-05 | 4.10E-03 |
| cg15541062 | 11 | 5531199   | UBQLN3       | -0.24 | 4.37E-05 | 4.10E-03 |
| cg24725789 | 10 | 119310288 |              | 0.25  | 4.37E-05 | 4.10E-03 |
| cg17592360 | 1  | 119543590 |              | 0.28  | 4.37E-05 | 4.10E-03 |
| cg10293403 | 6  | 10421670  |              | 0.27  | 4.38E-05 | 4.11E-03 |
| cg18698884 | 11 | 16632724  |              | 0.21  | 4.40E-05 | 4.12E-03 |
| cg09854003 | 5  | 170743459 |              | 0.24  | 4.41E-05 | 4.13E-03 |
| cg01994275 | 7  | 8480586   | NXPH1        | 0.20  | 4.44E-05 | 4.14E-03 |
| cg11053663 | 11 | 58034457  | OR10W1       | -0.21 | 4.45E-05 | 4.15E-03 |
| cg10394788 | 9  | 124360547 | DAB2IP       | 0.23  | 4.45E-05 | 4.15E-03 |
| cg08453263 | 11 | 16838675  | PLEKHA7      | -0.22 | 4.46E-05 | 4.16E-03 |
| cg22370252 | 12 | 54446289  | HOXC4        | 0.23  | 4.47E-05 | 4.16E-03 |
| cg02444978 | 7  | 16438128  | ISPD         | -0.21 | 4.49E-05 | 4.17E-03 |
| cg06637517 | 3  | 52407344  | DNAH1        | 0.25  | 4.49E-05 | 4.17E-03 |
| cg11168433 | 1  | 41283979  | KCNQ4        | 0.23  | 4.50E-05 | 4.18E-03 |
| cg11930400 | 4  | 111533883 |              | 0.25  | 4.50E-05 | 4.18E-03 |
| cg26033466 | 7  | 96644782  | DLX6AS       | 0.22  | 4.50E-05 | 4.18E-03 |
| cg22381351 | 3  | 100424830 |              | -0.21 | 4.51E-05 | 4.18E-03 |
| cg02599464 | 6  | 27107097  | HIST1H2BK    | 0.29  | 4.51E-05 | 4.18E-03 |
| cg00400448 | 15 | 60285691  |              | 0.25  | 4.51E-05 | 4.18E-03 |
| cg23874561 | 4  | 81124484  | PRDM8        | 0.23  | 4.51E-05 | 4.18E-03 |
| cg08315770 | 6  | 39281885  | KCNK17       | 0.28  | 4.52E-05 | 4.18E-03 |
| cg09774842 | 20 | 3052483   | OXT          | 0.22  | 4.52E-05 | 4.18E-03 |
| cg07390647 | 3  | 98453086  | ST3GAL6      | 0.22  | 4.52E-05 | 4.18E-03 |
| cg05569742 | 5  | 122429414 | PRDM6        | 0.24  | 4.52E-05 | 4.19E-03 |
| cg05279513 | 11 | 9880619   | SBF2         | -0.20 | 4.53E-05 | 4.19E-03 |
| cg13870102 | 1  | 33772519  |              | 0.23  | 4.54E-05 | 4.20E-03 |
| cg20216139 | 11 | 16632509  |              | 0.20  | 4.55E-05 | 4.20E-03 |

|            |    |           |           |       |          |          |
|------------|----|-----------|-----------|-------|----------|----------|
| cg11330740 | 5  | 172660884 | NKX2-5    | 0.21  | 4.55E-05 | 4.21E-03 |
| cg01089249 | 2  | 171676553 | GAD1      | 0.22  | 4.56E-05 | 4.21E-03 |
| cg15666214 | 6  | 108438316 |           | 0.25  | 4.57E-05 | 4.22E-03 |
| cg08205700 | 8  | 80696168  |           | 0.25  | 4.58E-05 | 4.22E-03 |
| cg21124375 | 2  | 232765392 |           | 0.23  | 4.59E-05 | 4.23E-03 |
| cg19108747 | 2  | 225266263 | FAM124B   | -0.24 | 4.60E-05 | 4.23E-03 |
| cg09093485 | 6  | 30038882  | RNF39     | 0.21  | 4.61E-05 | 4.23E-03 |
| cg25138715 | 3  | 157217414 | VEPH1     | 0.25  | 4.63E-05 | 4.25E-03 |
| cg22284043 | 13 | 92051576  | GPC5      | 0.25  | 4.63E-05 | 4.25E-03 |
| cg03157027 | 8  | 99959723  | OSR2      | 0.20  | 4.64E-05 | 4.25E-03 |
| cg14106308 | 3  | 157217286 | VEPH1     | 0.25  | 4.65E-05 | 4.26E-03 |
| cg02081701 | 2  | 139537197 | NXPH2     | 0.26  | 4.67E-05 | 4.27E-03 |
| cg20402783 | 12 | 54381013  | HOXC10    | 0.26  | 4.69E-05 | 4.29E-03 |
| cg27400447 | 13 | 100549017 | CLYBL     | 0.28  | 4.71E-05 | 4.30E-03 |
| cg24789723 | 10 | 102501346 |           | 0.23  | 4.73E-05 | 4.32E-03 |
| cg23651585 | 7  | 70252448  | AUTS2     | 0.22  | 4.74E-05 | 4.32E-03 |
| cg11447335 | 5  | 865350    | BRD9      | -0.23 | 4.75E-05 | 4.33E-03 |
| cg17733616 | 17 | 73083887  | SLC16A5   | 0.25  | 4.76E-05 | 4.33E-03 |
| cg20647118 | 13 | 92051786  | GPC5      | 0.21  | 4.77E-05 | 4.33E-03 |
| cg16013925 | 6  | 30483908  |           | 0.21  | 4.80E-05 | 4.35E-03 |
| cg22531904 | 7  | 99595276  |           | 0.25  | 4.81E-05 | 4.36E-03 |
| cg14911395 | 3  | 50311213  | SEMA3B    | 0.21  | 4.81E-05 | 4.36E-03 |
| cg21848524 | 3  | 27771053  |           | 0.23  | 4.82E-05 | 4.36E-03 |
| cg18980554 | 15 | 70233856  |           | 0.26  | 4.84E-05 | 4.37E-03 |
| cg18958126 | 13 | 100547367 | CLYBL     | 0.29  | 4.84E-05 | 4.37E-03 |
| cg24340935 | 19 | 3877286   |           | 0.20  | 4.85E-05 | 4.38E-03 |
| cg27369096 | 5  | 2169769   |           | -0.26 | 4.86E-05 | 4.38E-03 |
| cg20264732 | 16 | 68269763  | ESRP2     | 0.22  | 4.87E-05 | 4.39E-03 |
| cg19871388 | 20 | 50419082  | SALL4     | 0.23  | 4.90E-05 | 4.41E-03 |
| cg25640822 | 5  | 134871645 | NEUROG1   | 0.21  | 4.90E-05 | 4.41E-03 |
| cg20438306 | 4  | 41747092  | PHOX2B    | 0.23  | 4.93E-05 | 4.43E-03 |
| cg15422685 | 3  | 62356774  | FEZF2     | 0.22  | 4.93E-05 | 4.43E-03 |
| cg09058099 | 12 | 10853263  | CSDA      | -0.21 | 4.94E-05 | 4.43E-03 |
| cg07561547 | 1  | 201368783 | LAD1      | 0.24  | 4.95E-05 | 4.43E-03 |
| cg13020870 | 15 | 37173017  | LOC145845 | 0.25  | 4.95E-05 | 4.43E-03 |
| cg20139247 | 8  | 65286989  |           | 0.25  | 4.95E-05 | 4.44E-03 |
| cg09781994 | 4  | 111548118 | PITX2     | 0.22  | 4.96E-05 | 4.44E-03 |
| cg07159802 | 1  | 247921568 | OR1C1     | -0.23 | 4.96E-05 | 4.44E-03 |
| cg02155658 | 20 | 21690036  | PAX1      | 0.22  | 4.99E-05 | 4.46E-03 |
| cg16706324 | 11 | 5685914   | TRIM78P   | -0.24 | 4.99E-05 | 4.46E-03 |
| cg02167020 | 10 | 102899949 |           | 0.25  | 4.99E-05 | 4.46E-03 |
| cg12535715 | 8  | 38831693  | HTRA4     | 0.21  | 5.00E-05 | 4.46E-03 |
| cg06756211 | 1  | 223936799 | CAPN2     | 0.26  | 5.00E-05 | 4.46E-03 |
| cg07056644 | 16 | 86546785  | FOXF1     | 0.25  | 5.01E-05 | 4.47E-03 |
| cg19814934 | 5  | 42950152  |           | 0.27  | 5.02E-05 | 4.47E-03 |
| cg03344149 | 13 | 28535559  |           | 0.21  | 5.03E-05 | 4.48E-03 |
| cg26066361 | 12 | 10282621  | CLEC7A    | -0.25 | 5.03E-05 | 4.48E-03 |
| cg03744763 | 7  | 27184737  | HOXA5     | 0.23  | 5.03E-05 | 4.48E-03 |
| cg16919569 | 4  | 174452835 | NBLA00301 | 0.23  | 5.04E-05 | 4.48E-03 |
| cg04787024 | 2  | 99553442  | C2orf55   | 0.28  | 5.04E-05 | 4.48E-03 |
| cg00673286 | 15 | 83349613  | AP3B2     | 0.21  | 5.06E-05 | 4.49E-03 |
| cg10996039 | 7  | 27178861  |           | 0.21  | 5.06E-05 | 4.49E-03 |
| cg08741898 | 10 | 102881276 | TLX1NB    | 0.27  | 5.07E-05 | 4.49E-03 |
| cg00894757 | 3  | 170137240 | CLDN11    | 0.24  | 5.07E-05 | 4.49E-03 |
| cg03977089 | 8  | 65287005  |           | 0.23  | 5.08E-05 | 4.50E-03 |
| cg17236169 | 11 | 64480683  | NRXN2     | 0.22  | 5.09E-05 | 4.51E-03 |
| cg24740026 | 5  | 10333868  |           | 0.29  | 5.12E-05 | 4.52E-03 |
| cg23619769 | 11 | 71952356  | PHOX2A    | 0.25  | 5.12E-05 | 4.52E-03 |
| cg22669060 | 21 | 34774882  | IFNGR2    | 0.20  | 5.14E-05 | 4.53E-03 |
| cg11982736 | 6  | 43276570  | CRIP3     | 0.23  | 5.14E-05 | 4.54E-03 |
| cg07035659 | 4  | 4859975   | MSX1      | 0.21  | 5.16E-05 | 4.54E-03 |
| cg01076272 | 16 | 86320281  |           | 0.20  | 5.17E-05 | 4.55E-03 |
| cg17176016 | 6  | 108441207 |           | 0.21  | 5.18E-05 | 4.56E-03 |
| cg03171003 | 2  | 111875934 |           | 0.21  | 5.19E-05 | 4.56E-03 |
| cg14013695 | 7  | 27184176  | HOXA5     | 0.23  | 5.19E-05 | 4.56E-03 |
| cg14679255 | 12 | 54385526  | MIR196A2  | 0.20  | 5.19E-05 | 4.57E-03 |

|            |    |           |              |       |          |          |
|------------|----|-----------|--------------|-------|----------|----------|
| cg23358625 | 19 | 23945641  | RPSAP58      | 0.29  | 5.20E-05 | 4.57E-03 |
| cg06829299 | 8  | 65286632  |              | 0.22  | 5.21E-05 | 4.57E-03 |
| cg03895540 | 11 | 5841482   | OR52N2       | -0.21 | 5.21E-05 | 4.57E-03 |
| cg26193694 | 7  | 6543354   | GRID2IP      | 0.27  | 5.23E-05 | 4.58E-03 |
| cg09992746 | 15 | 60285821  |              | 0.21  | 5.26E-05 | 4.60E-03 |
| cg18352935 | 11 | 4843021   | OR51F2       | -0.21 | 5.33E-05 | 4.65E-03 |
| cg02018902 | 15 | 79576149  | ANKRD34C     | 0.23  | 5.34E-05 | 4.66E-03 |
| cg01177854 | 16 | 68270387  | ESRP2        | 0.20  | 5.36E-05 | 4.66E-03 |
| cg00647046 | 10 | 134734612 |              | 0.20  | 5.39E-05 | 4.68E-03 |
| cg12974637 | 18 | 52626668  | CCDC68       | 0.21  | 5.39E-05 | 4.68E-03 |
| cg14466251 | 9  | 134704033 |              | -0.22 | 5.41E-05 | 4.69E-03 |
| cg26837870 | 12 | 49658878  | TUBA1C       | 0.21  | 5.41E-05 | 4.69E-03 |
| cg14080155 | 2  | 45179727  |              | 0.23  | 5.41E-05 | 4.69E-03 |
| cg13519918 | 12 | 89748985  |              | 0.22  | 5.45E-05 | 4.72E-03 |
| cg27553955 | 2  | 42720326  | KCNG3        | 0.22  | 5.45E-05 | 4.72E-03 |
| cg20374595 | 13 | 100627956 |              | 0.29  | 5.45E-05 | 4.72E-03 |
| cg16840358 | 3  | 27765484  |              | 0.28  | 5.45E-05 | 4.72E-03 |
| cg21493633 | 4  | 166795596 | TLL1         | 0.22  | 5.47E-05 | 4.72E-03 |
| cg14819504 | 2  | 160761413 | LY75         | 0.25  | 5.47E-05 | 4.72E-03 |
| cg06303772 | 19 | 17717530  | UNC13A       | 0.26  | 5.48E-05 | 4.73E-03 |
| cg21306329 | 17 | 73083876  | SLC16A5      | 0.22  | 5.48E-05 | 4.73E-03 |
| cg16406892 | 12 | 115118777 | TBX3         | 0.22  | 5.49E-05 | 4.74E-03 |
| cg07150255 | 6  | 29324414  | OR5V1        | -0.24 | 5.51E-05 | 4.74E-03 |
| cg15823495 | 12 | 123214554 | GPR81        | -0.23 | 5.51E-05 | 4.74E-03 |
| cg17082225 | 7  | 56673049  |              | -0.20 | 5.51E-05 | 4.74E-03 |
| cg12687069 | 11 | 5474001   | OR51I2       | -0.21 | 5.52E-05 | 4.75E-03 |
| cg03780851 | 8  | 102504564 | GRHL2        | 0.20  | 5.52E-05 | 4.75E-03 |
| cg20857455 | 12 | 39300142  | CPNE8        | 0.27  | 5.53E-05 | 4.75E-03 |
| cg03051777 | 12 | 115131789 |              | 0.24  | 5.54E-05 | 4.76E-03 |
| cg05741937 | 12 | 104609797 | TXNRD1       | 0.23  | 5.55E-05 | 4.76E-03 |
| cg13030332 | 12 | 115117351 | TBX3         | 0.23  | 5.56E-05 | 4.76E-03 |
| cg24481868 | 13 | 50070504  | PHF11        | 0.23  | 5.56E-05 | 4.76E-03 |
| cg06856720 | 20 | 19870217  | RIN2         | -0.22 | 5.57E-05 | 4.76E-03 |
| cg25318296 | 13 | 100547785 | CLYBL        | 0.24  | 5.57E-05 | 4.76E-03 |
| cg02245378 | 2  | 223161771 | PAX3         | 0.23  | 5.58E-05 | 4.77E-03 |
| cg26550710 | 8  | 97167878  | GDF6         | 0.22  | 5.58E-05 | 4.77E-03 |
| cg12784175 | 10 | 103589988 | KCNIP2       | 0.23  | 5.59E-05 | 4.78E-03 |
| cg12883629 | 6  | 25042497  |              | 0.22  | 5.59E-05 | 4.78E-03 |
| cg15383276 | 22 | 29709282  | RASL10A      | 0.26  | 5.61E-05 | 4.79E-03 |
| cg20169823 | 12 | 116354837 |              | 0.23  | 5.61E-05 | 4.79E-03 |
| cg24570303 | 10 | 102900491 |              | 0.26  | 5.63E-05 | 4.80E-03 |
| cg11539674 | 7  | 127291444 | SND1         | 0.22  | 5.65E-05 | 4.81E-03 |
| cg18358020 | 5  | 170744407 |              | 0.22  | 5.65E-05 | 4.81E-03 |
| cg25093813 | 2  | 45030336  |              | 0.23  | 5.67E-05 | 4.81E-03 |
| cg02721000 | 12 | 54441213  | HOXC4        | 0.23  | 5.68E-05 | 4.82E-03 |
| cg07790170 | 4  | 111537570 |              | 0.28  | 5.69E-05 | 4.82E-03 |
| cg14173147 | 9  | 27528300  | MOBK2B       | 0.24  | 5.70E-05 | 4.83E-03 |
| cg11176990 | 2  | 39187533  | LOC375196    | 0.20  | 5.70E-05 | 4.83E-03 |
| cg02987928 | 1  | 16553456  |              | 0.24  | 5.72E-05 | 4.84E-03 |
| cg22029297 | 1  | 26736798  | LIN28        | 0.22  | 5.72E-05 | 4.84E-03 |
| cg22461835 | 8  | 26723365  | ADRA1A       | 0.27  | 5.72E-05 | 4.84E-03 |
| cg21618333 | 15 | 62359139  | C2CD4A       | 0.23  | 5.75E-05 | 4.86E-03 |
| cg02472998 | 13 | 45945362  | LOC100190939 | 0.22  | 5.79E-05 | 4.89E-03 |
| cg27579609 | 1  | 20003062  | HTR6         | 0.23  | 5.82E-05 | 4.90E-03 |
| cg23533419 | 12 | 54090519  |              | 0.21  | 5.82E-05 | 4.90E-03 |
| cg12499235 | 11 | 2293173   | ASCL2        | 0.23  | 5.82E-05 | 4.90E-03 |
| cg22900415 | 13 | 20736075  | GJA3         | 0.27  | 5.86E-05 | 4.92E-03 |
| cg14486338 | 8  | 99440279  | KCNS2        | 0.28  | 5.87E-05 | 4.93E-03 |
| cg24812837 | 10 | 102894120 | TLX1         | 0.28  | 5.88E-05 | 4.93E-03 |
| cg02407720 | 6  | 10421372  |              | 0.28  | 5.88E-05 | 4.93E-03 |
| cg17645823 | 12 | 114846321 | TBX5         | 0.22  | 5.89E-05 | 4.94E-03 |
| cg06379721 | 10 | 102590401 |              | 0.24  | 5.90E-05 | 4.94E-03 |
| cg24840099 | 4  | 4864430   | MSX1         | 0.23  | 5.92E-05 | 4.95E-03 |
| cg11697427 | 10 | 102590168 |              | 0.25  | 5.93E-05 | 4.96E-03 |
| cg23913421 | 6  | 50674663  |              | 0.26  | 5.95E-05 | 4.97E-03 |
| cg07870307 | 5  | 140743780 | PCDHGA4      | 0.22  | 5.95E-05 | 4.97E-03 |

|            |    |           |           |       |          |          |
|------------|----|-----------|-----------|-------|----------|----------|
| cg01891966 | 7  | 27202344  | HOXA9     | -0.26 | 5.97E-05 | 4.98E-03 |
| cg24913868 | 10 | 101296069 | NKX2-3    | 0.24  | 5.97E-05 | 4.98E-03 |
| cg18705773 | 5  | 170743564 |           | 0.25  | 5.99E-05 | 5.00E-03 |
| cg23652859 | 19 | 59092692  | MGC2752   | 0.20  | 6.00E-05 | 5.00E-03 |
| cg23370306 | 2  | 242823485 |           | 0.21  | 6.00E-05 | 5.00E-03 |
| cg12115991 | 6  | 108438047 |           | 0.22  | 6.01E-05 | 5.00E-03 |
| cg18030960 | 4  | 13530948  |           | 0.25  | 6.02E-05 | 5.00E-03 |
| cg27439292 | 17 | 7670719   | DNAH2     | 0.20  | 6.02E-05 | 5.01E-03 |
| cg25049698 | 6  | 50692605  | TFAP2D    | 0.24  | 6.02E-05 | 5.01E-03 |
| cg11412853 | 12 | 115129801 |           | 0.24  | 6.03E-05 | 5.01E-03 |
| cg16265599 | 17 | 40936658  | WNK4      | 0.23  | 6.06E-05 | 5.03E-03 |
| cg00960305 | 20 | 22558297  | C20orf56  | 0.24  | 6.07E-05 | 5.03E-03 |
| cg07382435 | 1  | 50880864  |           | 0.20  | 6.13E-05 | 5.07E-03 |
| cg17474422 | 1  | 36039866  | TFAP2E    | 0.22  | 6.13E-05 | 5.08E-03 |
| cg16701059 | 15 | 101513798 | LRRK1     | 0.21  | 6.18E-05 | 5.11E-03 |
| cg21383487 | 10 | 22624094  |           | 0.24  | 6.20E-05 | 5.12E-03 |
| cg16391973 | 5  | 158689566 | UBLCP1    | -0.21 | 6.21E-05 | 5.13E-03 |
| cg16290866 | 8  | 97167768  | GDF6      | 0.25  | 6.22E-05 | 5.13E-03 |
| cg07063351 | 19 | 41060190  | SPTBN4    | 0.24  | 6.22E-05 | 5.13E-03 |
| cg27123256 | 14 | 99664279  | BCL11B    | -0.21 | 6.23E-05 | 5.14E-03 |
| cg04555220 | 5  | 9546695   | SEMA5A    | 0.23  | 6.26E-05 | 5.15E-03 |
| cg22660542 | 12 | 54402431  | HOXC8     | 0.20  | 6.27E-05 | 5.15E-03 |
| cg01331772 | 2  | 131094827 |           | 0.28  | 6.32E-05 | 5.18E-03 |
| cg00059699 | 12 | 10455788  | KLRD1     | -0.25 | 6.33E-05 | 5.19E-03 |
| cg02504521 | 12 | 46660819  | SLC38A1   | 0.27  | 6.33E-05 | 5.19E-03 |
| cg26382551 | 10 | 11047284  | CUGBP2    | 0.23  | 6.34E-05 | 5.19E-03 |
| cg13457165 | 1  | 40105079  | HEYL      | 0.21  | 6.34E-05 | 5.19E-03 |
| cg06444452 | 4  | 619635    | PDE6B     | -0.20 | 6.36E-05 | 5.20E-03 |
| cg23161999 | 2  | 162283189 |           | 0.24  | 6.37E-05 | 5.20E-03 |
| cg26305817 | 5  | 172656055 |           | 0.25  | 6.38E-05 | 5.21E-03 |
| cg09230996 | 10 | 102498419 |           | 0.21  | 6.39E-05 | 5.21E-03 |
| cg01636650 | 3  | 38040315  | VILL      | 0.25  | 6.39E-05 | 5.21E-03 |
| cg20403938 | 12 | 54377457  | HOXC10    | 0.22  | 6.42E-05 | 5.23E-03 |
| cg17180386 | 15 | 51386452  | TNFAIP8L3 | 0.22  | 6.46E-05 | 5.25E-03 |
| cg24700222 | 1  | 86622682  | COL24A1   | 0.25  | 6.46E-05 | 5.25E-03 |
| cg00394180 | 8  | 97167170  | GDF6      | 0.27  | 6.48E-05 | 5.25E-03 |
| cg23893898 | 4  | 6247571   |           | 0.20  | 6.48E-05 | 5.26E-03 |
| cg11673291 | 1  | 36787145  |           | 0.22  | 6.49E-05 | 5.26E-03 |
| cg11891395 | 7  | 96652153  | DLX5      | 0.27  | 6.50E-05 | 5.26E-03 |
| cg22158769 | 2  | 39187539  | LOC375196 | 0.22  | 6.51E-05 | 5.27E-03 |
| cg16670554 | 15 | 68118985  | LBXCOR1   | 0.24  | 6.52E-05 | 5.27E-03 |
| cg05959932 | 6  | 2382734   |           | -0.22 | 6.52E-05 | 5.27E-03 |
| cg17968795 | 2  | 99553406  | C2orf55   | 0.27  | 6.53E-05 | 5.27E-03 |
| cg06572465 | 5  | 140800929 | PCDHGA4   | 0.22  | 6.54E-05 | 5.28E-03 |
| cg03778029 | 18 | 52626773  | CCDC68    | 0.21  | 6.54E-05 | 5.28E-03 |
| cg04273871 | 10 | 102894227 | TLX1      | 0.25  | 6.54E-05 | 5.28E-03 |
| cg12552771 | 22 | 29709320  | RASL10A   | 0.24  | 6.57E-05 | 5.30E-03 |
| cg14820199 | 4  | 11429415  | HS3ST1    | 0.22  | 6.57E-05 | 5.30E-03 |
| cg11947493 | 8  | 23021515  | TNFRSF10D | 0.21  | 6.58E-05 | 5.30E-03 |
| cg26104752 | 1  | 119527377 | TBX15     | 0.22  | 6.59E-05 | 5.31E-03 |
| cg14218861 | 10 | 119443973 |           | -0.21 | 6.60E-05 | 5.31E-03 |
| cg25637829 | 10 | 77155545  |           | 0.24  | 6.60E-05 | 5.31E-03 |
| cg19780352 | 4  | 169798931 | PALLD     | 0.22  | 6.61E-05 | 5.31E-03 |
| cg01901107 | 7  | 150748284 | ACCN3     | 0.24  | 6.62E-05 | 5.32E-03 |
| cg20008148 | 14 | 37053169  | NKX2-8    | 0.21  | 6.63E-05 | 5.32E-03 |
| cg24029517 | 4  | 11429531  | HS3ST1    | 0.23  | 6.65E-05 | 5.33E-03 |
| cg24875593 | 21 | 45153009  | PDXK      | -0.22 | 6.66E-05 | 5.34E-03 |
| cg06303238 | 20 | 50418959  | SALL4     | 0.23  | 6.67E-05 | 5.34E-03 |
| cg13510849 | 6  | 164572718 |           | -0.24 | 6.67E-05 | 5.34E-03 |
| cg24735307 | 10 | 102881114 | TLX1NB    | 0.24  | 6.67E-05 | 5.34E-03 |
| cg04924185 | 16 | 56710098  | MT1IP     | 0.21  | 6.70E-05 | 5.36E-03 |
| cg09782540 | 6  | 10398698  | TFAP2A    | 0.23  | 6.71E-05 | 5.37E-03 |
| cg01974001 | 16 | 1297276   |           | -0.22 | 6.74E-05 | 5.38E-03 |
| cg09349604 | 4  | 41880747  |           | 0.25  | 6.74E-05 | 5.39E-03 |
| cg07977620 | 11 | 56380614  | OR5M1     | -0.21 | 6.76E-05 | 5.39E-03 |
| cg17386710 | 7  | 70252335  | AUTS2     | 0.26  | 6.79E-05 | 5.41E-03 |

|            |    |           |           |       |          |          |
|------------|----|-----------|-----------|-------|----------|----------|
| cg25995955 | 4  | 151500631 | LRBA      | 0.23  | 6.81E-05 | 5.42E-03 |
| cg04436554 | 5  | 172669976 |           | 0.21  | 6.83E-05 | 5.43E-03 |
| cg08064488 | 21 | 38068043  |           | 0.21  | 6.83E-05 | 5.43E-03 |
| cg09951047 | 9  | 97848306  | C9orf3    | -0.23 | 6.84E-05 | 5.43E-03 |
| cg02683759 | 2  | 157177072 |           | 0.24  | 6.84E-05 | 5.43E-03 |
| cg21737226 | 8  | 53326668  |           | -0.20 | 6.85E-05 | 5.44E-03 |
| cg21858614 | 17 | 8907340   |           | 0.23  | 6.87E-05 | 5.44E-03 |
| cg20206984 | 6  | 1381511   |           | 0.20  | 6.87E-05 | 5.44E-03 |
| cg12973118 | 2  | 223168941 | CCDC140   | 0.22  | 6.88E-05 | 5.45E-03 |
| cg24811352 | 5  | 140529499 | PCDHB6    | 0.21  | 6.91E-05 | 5.46E-03 |
| cg18209835 | 7  | 6543114   | GRID2IP   | 0.26  | 6.91E-05 | 5.46E-03 |
| cg12813724 | 1  | 26690537  | ZNF683    | 0.23  | 6.99E-05 | 5.50E-03 |
| cg01502588 | 2  | 119615889 |           | 0.26  | 7.00E-05 | 5.51E-03 |
| cg24941387 | 19 | 48491941  | BSPH1     | -0.23 | 7.02E-05 | 5.51E-03 |
| cg09886946 | 13 | 33590048  | KL        | 0.22  | 7.04E-05 | 5.53E-03 |
| cg09290705 | 15 | 60285508  |           | 0.23  | 7.05E-05 | 5.53E-03 |
| cg18161327 | 13 | 100627703 |           | 0.28  | 7.05E-05 | 5.53E-03 |
| cg05721365 | 17 | 62777693  | LOC146880 | 0.21  | 7.07E-05 | 5.54E-03 |
| cg08871964 | 19 | 41025863  | SPTBN4    | 0.20  | 7.10E-05 | 5.56E-03 |
| cg16600991 | 12 | 54389477  |           | 0.27  | 7.10E-05 | 5.56E-03 |
| cg14515571 | 11 | 20178627  | DBX1      | 0.23  | 7.11E-05 | 5.56E-03 |
| cg18557185 | 7  | 27128169  |           | 0.24  | 7.12E-05 | 5.56E-03 |
| cg14395444 | 12 | 2800182   | CACNA1C   | 0.23  | 7.12E-05 | 5.57E-03 |
| cg24464265 | 4  | 809452    | CPLX1     | -0.21 | 7.16E-05 | 5.58E-03 |
| cg17223809 | 1  | 86620676  | COL24A1   | 0.22  | 7.17E-05 | 5.58E-03 |
| cg15777781 | 10 | 11047271  | CUGBP2    | 0.21  | 7.20E-05 | 5.60E-03 |
| cg24330456 | 6  | 30038955  | RNF39     | 0.26  | 7.23E-05 | 5.63E-03 |
| cg19598416 | 1  | 223936812 | CAPN2     | 0.26  | 7.27E-05 | 5.65E-03 |
| cg24053070 | 21 | 17962124  | C21orf34  | -0.25 | 7.29E-05 | 5.66E-03 |
| cg19187831 | 11 | 67232316  | TMEM134   | 0.21  | 7.30E-05 | 5.66E-03 |
| cg10186366 | 17 | 71898817  |           | 0.22  | 7.31E-05 | 5.67E-03 |
| cg03312366 | 2  | 45179416  |           | 0.23  | 7.34E-05 | 5.68E-03 |
| cg26818625 | 8  | 72471153  |           | 0.24  | 7.36E-05 | 5.70E-03 |
| cg14684854 | 2  | 241901865 |           | -0.21 | 7.37E-05 | 5.70E-03 |
| cg03001942 | 2  | 71115787  |           | 0.25  | 7.37E-05 | 5.70E-03 |
| cg03814390 | 17 | 77776716  |           | 0.24  | 7.37E-05 | 5.70E-03 |
| cg14311811 | 18 | 29077863  | DSG2      | 0.22  | 7.38E-05 | 5.70E-03 |
| cg20018806 | 11 | 59633874  | TCN1      | -0.22 | 7.38E-05 | 5.70E-03 |
| cg08935125 | 16 | 3068085   | CLDN6     | 0.22  | 7.39E-05 | 5.70E-03 |
| cg17555373 | 13 | 53775108  |           | 0.25  | 7.40E-05 | 5.71E-03 |
| cg07400503 | 10 | 134110222 | STK32C    | -0.21 | 7.40E-05 | 5.71E-03 |
| cg08184792 | 12 | 48592270  |           | 0.21  | 7.41E-05 | 5.71E-03 |
| cg20818806 | 13 | 110885926 | COL4A1    | -0.24 | 7.41E-05 | 5.71E-03 |
| cg12214451 | 4  | 114900175 | ARSJ      | 0.23  | 7.41E-05 | 5.71E-03 |
| cg24845578 | 5  | 95170808  |           | 0.23  | 7.45E-05 | 5.73E-03 |
| cg20454887 | 2  | 54935920  |           | 0.22  | 7.46E-05 | 5.73E-03 |
| cg16680438 | 1  | 16553549  |           | 0.21  | 7.58E-05 | 5.79E-03 |
| cg22482278 | 17 | 80289631  | SECTM1    | -0.22 | 7.58E-05 | 5.79E-03 |
| cg06272038 | 11 | 2292512   | ASCL2     | 0.23  | 7.59E-05 | 5.80E-03 |
| cg03320827 | 6  | 10887367  | SYCP2L    | 0.24  | 7.60E-05 | 5.80E-03 |
| cg03269050 | 10 | 102881545 | TLX1NB    | 0.23  | 7.61E-05 | 5.81E-03 |
| cg13759674 | 9  | 140051205 | GRIN1     | 0.28  | 7.63E-05 | 5.82E-03 |
| cg04181892 | 2  | 54936027  |           | 0.22  | 7.70E-05 | 5.85E-03 |
| cg03201044 | 20 | 55203291  | TFAP2C    | 0.25  | 7.71E-05 | 5.86E-03 |
| cg08658621 | 10 | 133999287 | DPYSL4    | 0.21  | 7.73E-05 | 5.87E-03 |
| cg16168014 | 7  | 42928245  |           | 0.25  | 7.76E-05 | 5.88E-03 |
| cg12458970 | 20 | 44656372  | SLC12A5   | 0.21  | 7.78E-05 | 5.90E-03 |
| cg22524061 | 8  | 99959430  | OSR2      | 0.24  | 7.79E-05 | 5.90E-03 |
| cg13345318 | 9  | 127216008 | GPR144    | 0.25  | 7.80E-05 | 5.90E-03 |
| cg03126579 | 19 | 3822189   | ZFR2      | 0.26  | 7.80E-05 | 5.90E-03 |
| cg00736459 | 6  | 100904376 | SIM1      | 0.22  | 7.80E-05 | 5.90E-03 |
| cg13330341 | 11 | 2292625   | ASCL2     | 0.21  | 7.81E-05 | 5.91E-03 |
| cg16458436 | 12 | 114846412 | TBX5      | 0.23  | 7.82E-05 | 5.91E-03 |
| cg22968167 | 11 | 4945873   | OR51G1    | -0.25 | 7.82E-05 | 5.91E-03 |
| cg27649239 | 15 | 68120393  | LBXCOR1   | 0.27  | 7.83E-05 | 5.91E-03 |
| cg10281002 | 12 | 114846399 | TBX5      | 0.27  | 7.85E-05 | 5.92E-03 |

|            |    |           |           |       |          |          |
|------------|----|-----------|-----------|-------|----------|----------|
| cg19713196 | 1  | 201368390 | LAD1      | 0.23  | 7.86E-05 | 5.93E-03 |
| cg11193411 | 13 | 30098324  | SLC7A1    | -0.21 | 7.89E-05 | 5.94E-03 |
| cg03737788 | 10 | 79492045  |           | -0.21 | 7.94E-05 | 5.97E-03 |
| cg26394220 | 2  | 219867925 | MIR375    | 0.26  | 7.95E-05 | 5.97E-03 |
| cg00034468 | 1  | 229568077 | ACTA1     | 0.20  | 7.98E-05 | 5.99E-03 |
| cg20129210 | 13 | 100547192 | CLYBL     | 0.29  | 8.00E-05 | 6.00E-03 |
| cg07462756 | 4  | 4859985   | MSX1      | 0.22  | 8.01E-05 | 6.00E-03 |
| cg12276019 | 8  | 11057947  | XKR6      | 0.25  | 8.02E-05 | 6.01E-03 |
| cg18918321 | 8  | 41424524  |           | 0.21  | 8.03E-05 | 6.01E-03 |
| cg00654159 | 16 | 32858241  |           | -0.21 | 8.06E-05 | 6.02E-03 |
| cg15855970 | 6  | 99273338  |           | 0.23  | 8.07E-05 | 6.03E-03 |
| cg27291698 | 6  | 43276578  | CRIP3     | 0.23  | 8.07E-05 | 6.03E-03 |
| cg14900124 | 2  | 177017630 | HOXD4     | 0.21  | 8.07E-05 | 6.03E-03 |
| cg00947032 | 13 | 36919960  | SPG20     | 0.23  | 8.11E-05 | 6.05E-03 |
| cg14201467 | 11 | 115372348 | CADM1     | 0.21  | 8.12E-05 | 6.05E-03 |
| cg13918518 | 17 | 59488240  | C17orf82  | 0.24  | 8.14E-05 | 6.06E-03 |
| cg21960859 | 4  | 166795649 | TLL1      | 0.23  | 8.17E-05 | 6.07E-03 |
| cg05155840 | 4  | 174448841 | HAND2     | 0.22  | 8.18E-05 | 6.07E-03 |
| cg16360659 | 6  | 28484320  | GPX6      | -0.24 | 8.22E-05 | 6.09E-03 |
| cg18241829 | 2  | 176952696 |           | 0.20  | 8.22E-05 | 6.09E-03 |
| cg15199678 | 7  | 96642510  | DLX6AS    | 0.23  | 8.23E-05 | 6.10E-03 |
| cg03160883 | 6  | 36628713  |           | 0.23  | 8.24E-05 | 6.10E-03 |
| cg26465602 | 16 | 1098847   |           | 0.23  | 8.26E-05 | 6.11E-03 |
| cg02053964 | 12 | 124950784 | NCOR2     | 0.21  | 8.28E-05 | 6.12E-03 |
| cg17463745 | 1  | 16554402  |           | 0.25  | 8.29E-05 | 6.12E-03 |
| cg19470379 | 15 | 74425092  | ISLR2     | 0.21  | 8.31E-05 | 6.13E-03 |
| cg09515953 | 19 | 38747355  | PPP1R14A  | 0.22  | 8.32E-05 | 6.14E-03 |
| cg17453840 | 15 | 83317526  | CPEB1     | 0.21  | 8.36E-05 | 6.15E-03 |
| cg15724945 | 1  | 119548527 |           | 0.22  | 8.36E-05 | 6.15E-03 |
| cg14554846 | 6  | 99273218  |           | 0.21  | 8.37E-05 | 6.15E-03 |
| cg19656950 | 13 | 100607772 |           | 0.22  | 8.37E-05 | 6.16E-03 |
| cg17820365 | 8  | 97157856  | GDF6      | 0.22  | 8.38E-05 | 6.16E-03 |
| cg24263062 | 20 | 2730191   | EBF4      | 0.23  | 8.38E-05 | 6.16E-03 |
| cg14657834 | 8  | 67875441  |           | 0.21  | 8.40E-05 | 6.17E-03 |
| cg18473733 | 19 | 16437362  | KLF2      | 0.21  | 8.40E-05 | 6.17E-03 |
| cg19904058 | 10 | 135279010 | LOC619207 | 0.21  | 8.43E-05 | 6.18E-03 |
| cg07638650 | 10 | 43697849  | RASGEF1A  | 0.24  | 8.45E-05 | 6.19E-03 |
| cg06921011 | 10 | 102589467 | PAX2      | 0.23  | 8.45E-05 | 6.19E-03 |
| cg18240400 | 10 | 46168597  | ANUBL1    | 0.21  | 8.46E-05 | 6.19E-03 |
| cg13191808 | 1  | 55505327  | PCSK9     | 0.22  | 8.48E-05 | 6.20E-03 |
| cg16407924 | 2  | 1452260   | TPO       | -0.21 | 8.50E-05 | 6.21E-03 |
| cg16594007 | 19 | 57641963  | USP29     | -0.21 | 8.53E-05 | 6.22E-03 |
| cg14038391 | 10 | 102900130 |           | 0.28  | 8.54E-05 | 6.23E-03 |
| cg03762994 | 17 | 6899332   | ALOX12    | 0.20  | 8.55E-05 | 6.23E-03 |
| cg21376799 | 6  | 30094960  |           | 0.21  | 8.59E-05 | 6.25E-03 |
| cg22190114 | 19 | 56459234  | NLRP8     | -0.20 | 8.62E-05 | 6.27E-03 |
| cg08871608 | 19 | 40729274  | CNTD2     | 0.23  | 8.63E-05 | 6.27E-03 |
| cg09829319 | 6  | 10882238  | GCM2      | 0.25  | 8.63E-05 | 6.27E-03 |
| cg21790626 | 19 | 58220494  | ZNF154    | 0.27  | 8.67E-05 | 6.29E-03 |
| cg11655243 | 5  | 140778396 | PCDHGA4   | 0.20  | 8.68E-05 | 6.29E-03 |
| cg08049853 | 4  | 41875784  |           | 0.20  | 8.71E-05 | 6.31E-03 |
| cg16501625 | 16 | 54628759  |           | 0.24  | 8.73E-05 | 6.31E-03 |
| cg07783843 | 2  | 176997311 |           | 0.21  | 8.76E-05 | 6.33E-03 |
| cg17259358 | 6  | 99273385  |           | 0.22  | 8.78E-05 | 6.34E-03 |
| cg03399905 | 15 | 79576060  | ANKRD34C  | 0.26  | 8.79E-05 | 6.34E-03 |
| cg12392473 | 20 | 48099331  | KCNB1     | 0.26  | 8.80E-05 | 6.35E-03 |
| cg16561266 | 17 | 62777777  | LOC146880 | 0.20  | 8.83E-05 | 6.36E-03 |
| cg27140058 | 4  | 102712216 | BANK1     | 0.23  | 8.86E-05 | 6.37E-03 |
| cg01962676 | 1  | 18436969  | IGSF21    | 0.24  | 8.87E-05 | 6.38E-03 |
| cg11989330 | 1  | 65468827  |           | 0.25  | 8.88E-05 | 6.38E-03 |
| cg09234616 | 11 | 32452592  | WT1       | 0.26  | 8.89E-05 | 6.39E-03 |
| cg08925169 | 11 | 5664261   | TRIM34    | -0.26 | 8.92E-05 | 6.40E-03 |
| cg17139085 | 1  | 36787356  |           | 0.24  | 8.95E-05 | 6.43E-03 |
| cg20536041 | 2  | 45029004  |           | 0.25  | 8.95E-05 | 6.43E-03 |
| cg07625194 | 6  | 50683782  | TFAP2D    | 0.25  | 8.96E-05 | 6.43E-03 |
| cg04895288 | 7  | 98099949  |           | 0.24  | 8.98E-05 | 6.44E-03 |



|            |    |           |           |       |          |          |
|------------|----|-----------|-----------|-------|----------|----------|
| cg13279673 | 6  | 50674522  |           | 0.23  | 8.98E-05 | 6.44E-03 |
| cg02794451 | 12 | 2800446   | CACNA1C   | 0.25  | 8.98E-05 | 6.44E-03 |
| cg18978493 | 7  | 27225855  | HOXA11AS  | 0.21  | 8.98E-05 | 6.44E-03 |
| cg19127138 | 7  | 65196881  |           | 0.23  | 8.99E-05 | 6.44E-03 |
| cg26190890 | 6  | 27107718  | HIST1H2BK | 0.25  | 9.01E-05 | 6.45E-03 |
| cg22049858 | 11 | 94884121  |           | 0.22  | 9.01E-05 | 6.45E-03 |
| cg24338833 | 8  | 10592227  |           | 0.21  | 9.02E-05 | 6.45E-03 |
| cg01714811 | 3  | 27764473  | EOMES     | 0.21  | 9.03E-05 | 6.45E-03 |
| cg06531379 | 1  | 47911449  |           | 0.25  | 9.08E-05 | 6.48E-03 |
| cg15244049 | 6  | 10883376  | GCM2      | 0.25  | 9.12E-05 | 6.50E-03 |
| cg14365570 | 14 | 73958272  | HEATR4    | 0.24  | 9.12E-05 | 6.50E-03 |
| cg15084543 | 1  | 79472408  | ELTD1     | 0.21  | 9.13E-05 | 6.50E-03 |
| cg17964844 | 12 | 49367911  |           | 0.22  | 9.13E-05 | 6.50E-03 |
| cg04848682 | 14 | 77492060  | C14orf4   | 0.21  | 9.14E-05 | 6.50E-03 |
| cg10692467 | 3  | 50313021  | SEMA3B    | 0.24  | 9.16E-05 | 6.51E-03 |
| cg13968218 | 9  | 127216047 | GPR144    | 0.25  | 9.18E-05 | 6.52E-03 |
| cg05092308 | 2  | 63285365  |           | 0.22  | 9.19E-05 | 6.53E-03 |
| cg15442907 | 12 | 2800463   | CACNA1C   | 0.25  | 9.24E-05 | 6.55E-03 |
| cg14250833 | 6  | 10882240  | GCM2      | 0.27  | 9.26E-05 | 6.56E-03 |
| cg12999453 | 17 | 59482319  | TBX2      | 0.22  | 9.30E-05 | 6.58E-03 |
| cg16136262 | 1  | 169429604 |           | 0.21  | 9.31E-05 | 6.58E-03 |
| cg12206199 | 2  | 39187543  | LOC375196 | 0.23  | 9.31E-05 | 6.58E-03 |
| cg25139877 | 1  | 247691111 | LOC148824 | -0.24 | 9.31E-05 | 6.58E-03 |
| cg24984523 | 13 | 50070436  | PHF11     | 0.20  | 9.32E-05 | 6.58E-03 |
| cg08169827 | 1  | 32054766  |           | 0.25  | 9.33E-05 | 6.58E-03 |
| cg10374009 | 11 | 44341361  |           | 0.22  | 9.34E-05 | 6.59E-03 |
| cg15929797 | 5  | 172660796 | NKX2-5    | 0.28  | 9.36E-05 | 6.60E-03 |
| cg20908789 | 8  | 11551964  |           | 0.20  | 9.40E-05 | 6.62E-03 |
| cg24375409 | 1  | 38200920  | EPHA10    | 0.24  | 9.40E-05 | 6.62E-03 |
| cg23268208 | 22 | 30476345  | HORMAD2   | 0.23  | 9.41E-05 | 6.62E-03 |
| cg10375078 | 10 | 22624374  |           | 0.23  | 9.41E-05 | 6.62E-03 |
| cg17320707 | 10 | 119307931 | EMX2      | 0.22  | 9.41E-05 | 6.62E-03 |
| cg11511443 | 12 | 16761406  | LMO3      | 0.21  | 9.44E-05 | 6.63E-03 |
| cg22022798 | 1  | 221065961 |           | 0.21  | 9.44E-05 | 6.63E-03 |
| cg18362509 | 14 | 101925705 |           | 0.24  | 9.45E-05 | 6.63E-03 |
| cg04085768 | 4  | 113333052 | ALPK1     | 0.22  | 9.47E-05 | 6.65E-03 |
| cg19280586 | 15 | 68125197  | LBXCOR1   | 0.22  | 9.53E-05 | 6.67E-03 |
| cg02909158 | 13 | 100616256 | ZIC5      | 0.27  | 9.54E-05 | 6.68E-03 |
| cg16568084 | 7  | 93811563  |           | -0.22 | 9.58E-05 | 6.70E-03 |
| cg03343571 | 6  | 30039175  | RNF39     | 0.25  | 9.59E-05 | 6.70E-03 |
| cg04568981 | 1  | 53125850  |           | -0.20 | 9.60E-05 | 6.70E-03 |
| cg05048976 | 3  | 55516243  | WNT5A     | 0.24  | 9.65E-05 | 6.74E-03 |
| cg18491080 | 15 | 60286463  |           | 0.20  | 9.68E-05 | 6.75E-03 |
| cg10128164 | 14 | 31344535  | COCH      | 0.23  | 9.68E-05 | 6.75E-03 |
| cg04651603 | 12 | 54321302  |           | 0.20  | 9.69E-05 | 6.76E-03 |
| cg24923509 | 10 | 102498399 |           | 0.22  | 9.71E-05 | 6.77E-03 |
| cg02719154 | 4  | 111533823 |           | 0.24  | 9.71E-05 | 6.77E-03 |
| cg05477457 | 4  | 169799308 | PALLD     | 0.27  | 9.71E-05 | 6.77E-03 |
| cg08867241 | 15 | 53087487  |           | 0.20  | 9.72E-05 | 6.77E-03 |
| cg09359114 | 7  | 96650096  | DLX5      | 0.23  | 9.75E-05 | 6.78E-03 |
| cg27236629 | 15 | 96877720  | NR2F2     | 0.22  | 9.76E-05 | 6.79E-03 |
| cg24115264 | 13 | 43149043  | TNFSF11   | 0.23  | 9.77E-05 | 6.79E-03 |
| cg00260802 | 20 | 21372203  |           | 0.22  | 9.78E-05 | 6.80E-03 |
| cg11966450 | 18 | 59992157  | TNFRSF11A | 0.21  | 9.78E-05 | 6.80E-03 |
| cg03365496 | 15 | 60286384  |           | 0.22  | 9.78E-05 | 6.80E-03 |
| cg01323381 | 7  | 27184264  | HOXA5     | 0.23  | 9.79E-05 | 6.80E-03 |
| cg10456990 | 21 | 38077597  | SIM2      | 0.24  | 9.80E-05 | 6.80E-03 |
| cg09656363 | 13 | 53775035  |           | 0.21  | 9.81E-05 | 6.81E-03 |
| cg20747577 | 7  | 26897253  | SKAP2     | 0.22  | 9.83E-05 | 6.81E-03 |
| cg01604429 | 11 | 18208699  |           | -0.23 | 9.87E-05 | 6.83E-03 |
| cg03207151 | 12 | 54442288  | HOXC4     | 0.22  | 9.93E-05 | 6.86E-03 |
| cg00689580 | 6  | 10420798  | TFAP2A    | 0.25  | 9.93E-05 | 6.86E-03 |
| cg01131038 | 8  | 10592118  |           | 0.22  | 9.94E-05 | 6.87E-03 |
| cg22083053 | 4  | 13541444  |           | 0.24  | 9.95E-05 | 6.87E-03 |
| cg00875272 | 1  | 47695321  | TAL1      | 0.22  | 9.96E-05 | 6.87E-03 |
| cg02449166 | 10 | 131748481 | EBF3      | 0.20  | 9.97E-05 | 6.88E-03 |

|            |    |           |           |       |             |          |
|------------|----|-----------|-----------|-------|-------------|----------|
| cg11940285 | 3  | 129693385 | TRH       | 0.26  | 0.000100019 | 6.89E-03 |
| cg27049766 | 19 | 58220516  | ZNF154    | 0.27  | 0.000100024 | 6.91E-03 |
| cg13717446 | 17 | 62777761  | LOC146880 | 0.20  | 0.000100342 | 6.91E-03 |
| cg19893751 | 2  | 45029285  |           | 0.27  | 0.000100645 | 6.92E-03 |
| cg08988797 | 8  | 102505513 | GRHL2     | 0.22  | 0.000100905 | 6.94E-03 |
| cg16961816 | 7  | 96633530  | DLX6AS    | 0.23  | 0.000101003 | 6.94E-03 |
| cg04859726 | 6  | 100894513 | SIM1      | 0.21  | 0.000101114 | 6.94E-03 |
| cg00953355 | 17 | 70114129  |           | 0.21  | 0.000101459 | 6.96E-03 |
| cg00049664 | 16 | 66613334  | CMTM2     | 0.20  | 0.000101614 | 6.96E-03 |
| cg23646776 | 4  | 111536970 |           | 0.24  | 0.00010163  | 6.96E-03 |
| cg25916711 | 5  | 172660080 | NKX2-5    | 0.25  | 0.000101666 | 6.96E-03 |
| cg25149238 | 2  | 45030384  |           | 0.23  | 0.000101955 | 6.98E-03 |
| cg02457328 | 12 | 103355190 |           | 0.23  | 0.000102083 | 6.98E-03 |
| cg08981421 | 7  | 27199956  |           | -0.23 | 0.000102333 | 6.99E-03 |
| cg04223006 | 5  | 82845599  | VCAN      | -0.23 | 0.000102405 | 6.99E-03 |
| cg00385863 | 1  | 41847974  |           | -0.21 | 0.000102837 | 7.01E-03 |
| cg01383890 | 15 | 62358982  | C2CD4A    | 0.21  | 0.000103089 | 7.02E-03 |
| cg21104276 | 7  | 90896572  | FZD1      | 0.25  | 0.000103098 | 7.02E-03 |
| cg00096104 | 13 | 100547897 | CLYBL     | 0.23  | 0.000103266 | 7.03E-03 |
| cg12451631 | 10 | 43698141  | RASGEF1A  | 0.25  | 0.000103336 | 7.03E-03 |
| cg16749785 | 8  | 12958083  | DLC1      | -0.21 | 0.000103414 | 7.04E-03 |
| cg17412442 | 11 | 5652129   | TRIM34    | -0.23 | 0.000103555 | 7.04E-03 |
| cg27122725 | 5  | 142781723 | NR3C1     | 0.21  | 0.000103666 | 7.04E-03 |
| cg02700891 | 3  | 129693586 | TRH       | 0.25  | 0.00010367  | 7.04E-03 |
| cg22099441 | 6  | 170531660 |           | -0.20 | 0.000104085 | 7.06E-03 |
| cg03546235 | 10 | 102590290 |           | 0.23  | 0.000104477 | 7.07E-03 |
| cg12687157 | 5  | 68710912  | MARVELD2  | 0.23  | 0.000104481 | 7.07E-03 |
| cg16176379 | 16 | 55543049  | LPCAT2    | 0.22  | 0.000104564 | 7.08E-03 |
| cg11416290 | 4  | 111532410 |           | 0.23  | 0.000104623 | 7.08E-03 |
| cg01419831 | 2  | 162283705 |           | 0.26  | 0.000104883 | 7.09E-03 |
| cg06456738 | 11 | 66361081  | CCDC87    | 0.20  | 0.000105108 | 7.10E-03 |
| cg18198545 | 1  | 160255804 | PEX19     | -0.21 | 0.000105441 | 7.11E-03 |
| cg22027433 | 17 | 62208049  | ERN1      | 0.21  | 0.000105495 | 7.11E-03 |
| cg07909759 | 10 | 118429813 | C10orf82  | 0.25  | 0.000106566 | 7.17E-03 |
| cg16940012 | 5  | 174159564 |           | 0.23  | 0.000106887 | 7.19E-03 |
| cg00400832 | 7  | 96650323  | DLX5      | 0.23  | 0.000107301 | 7.20E-03 |
| cg23599771 | 1  | 190444825 | FAM5C     | 0.21  | 0.000107306 | 7.20E-03 |
| cg06370862 | 6  | 50680748  | TFAP2D    | 0.26  | 0.000107455 | 7.21E-03 |
| cg21538208 | 4  | 4864488   | MSX1      | 0.26  | 0.000107456 | 7.21E-03 |
| cg17526229 | 11 | 20177746  |           | 0.21  | 0.000107512 | 7.21E-03 |
| cg16713262 | 16 | 79623751  |           | 0.21  | 0.00010756  | 7.21E-03 |
| cg21805936 | 12 | 116008178 |           | 0.22  | 0.000108002 | 7.23E-03 |
| cg11195797 | 13 | 100547331 | CLYBL     | 0.29  | 0.000108088 | 7.24E-03 |
| cg02196834 | 6  | 108484512 |           | 0.21  | 0.000108193 | 7.24E-03 |
| cg26156687 | 10 | 102586168 | PAX2      | 0.24  | 0.000108207 | 7.24E-03 |
| cg00908833 | 6  | 50810432  | TFAP2B    | 0.20  | 0.000108927 | 7.28E-03 |
| cg25586361 | 11 | 32455444  | WT1       | 0.21  | 0.000109028 | 7.29E-03 |
| cg16010717 | 1  | 158609685 | SPTA1     | -0.21 | 0.00010975  | 7.32E-03 |
| cg07629965 | 3  | 50312389  | SEMA3B    | 0.21  | 0.0001098   | 7.32E-03 |
| cg25730098 | 19 | 56346628  | NLRP11    | -0.24 | 0.00011014  | 7.33E-03 |
| cg26686732 | 20 | 22562737  | FOXA2     | 0.25  | 0.000110664 | 7.35E-03 |
| cg07963990 | 2  | 223170370 |           | 0.21  | 0.000111192 | 7.37E-03 |
| cg04304978 | 10 | 8809772   |           | -0.21 | 0.000111339 | 7.38E-03 |
| cg09918657 | 16 | 14397207  | MIR193B   | 0.22  | 0.000111375 | 7.38E-03 |
| cg08835113 | 7  | 96650192  | DLX5      | 0.24  | 0.000111749 | 7.39E-03 |
| cg23740882 | 20 | 44098387  | WFDC2     | 0.23  | 0.000112923 | 7.45E-03 |
| cg05469285 | 11 | 20178979  | DBX1      | 0.26  | 0.000113274 | 7.46E-03 |
| cg06347739 | 11 | 2292636   | ASCL2     | 0.23  | 0.000113375 | 7.47E-03 |
| cg02747379 | 16 | 34983912  |           | -0.28 | 0.000113421 | 7.47E-03 |
| cg26048630 | 1  | 170640675 | PRRX1     | 0.21  | 0.00011345  | 7.47E-03 |
| cg18481230 | 2  | 155555347 | KCNJ3     | 0.21  | 0.000113766 | 7.48E-03 |
| cg27363141 | 6  | 30038929  | RNF39     | 0.25  | 0.000113776 | 7.48E-03 |
| cg13667243 | 5  | 157001561 | ADAM19    | 0.22  | 0.000114523 | 7.52E-03 |
| cg27190239 | 12 | 10085174  | CLEC2A    | -0.22 | 0.000114804 | 7.54E-03 |
| cg05166022 | 12 | 2800471   | CACNA1C   | 0.23  | 0.000115019 | 7.54E-03 |
| cg04637478 | 5  | 140753655 | PCDHGA4   | 0.20  | 0.000115252 | 7.55E-03 |

|            |    |           |           |       |             |          |
|------------|----|-----------|-----------|-------|-------------|----------|
| cg13176012 | 2  | 157176971 |           | 0.21  | 0.000115328 | 7.56E-03 |
| cg20817073 | 21 | 15071306  |           | 0.21  | 0.000115407 | 7.56E-03 |
| cg17718728 | 10 | 117897141 | GFRA1     | -0.21 | 0.000115868 | 7.58E-03 |
| cg27458485 | 12 | 99139571  | ANKS1B    | 0.21  | 0.000116021 | 7.58E-03 |
| cg26195178 | 5  | 1885716   |           | 0.21  | 0.000116159 | 7.59E-03 |
| cg22894896 | 17 | 29886890  | MIR193A   | 0.27  | 0.000116406 | 7.60E-03 |
| cg03781931 | 12 | 85673200  | ALX1      | 0.24  | 0.000116788 | 7.61E-03 |
| cg01402347 | 4  | 96472269  |           | 0.22  | 0.000117334 | 7.64E-03 |
| cg10164738 | 15 | 87667552  |           | -0.24 | 0.000117437 | 7.64E-03 |
| cg06982190 | 7  | 27199815  |           | -0.25 | 0.000117591 | 7.64E-03 |
| cg02123091 | 12 | 66261320  | HMGA2     | -0.23 | 0.000117724 | 7.64E-03 |
| cg01841641 | 2  | 223169965 |           | 0.26  | 0.000117798 | 7.64E-03 |
| cg17737621 | 20 | 21372480  |           | 0.24  | 0.000117867 | 7.65E-03 |
| cg12435629 | 1  | 75598039  | LHX8      | 0.20  | 0.000117957 | 7.65E-03 |
| cg00839584 | 2  | 113542091 | IL1A      | -0.23 | 0.000118011 | 7.65E-03 |
| cg00567703 | 12 | 54413101  | HOXC4     | 0.22  | 0.000118783 | 7.68E-03 |
| cg19046933 | 6  | 30038922  | RNF39     | 0.28  | 0.000118827 | 7.68E-03 |
| cg20981086 | 14 | 101923256 |           | 0.23  | 0.000119372 | 7.70E-03 |
| cg08431693 | 7  | 99680287  | ZNF3      | 0.21  | 0.000119652 | 7.71E-03 |
| cg16009970 | 17 | 7198721   | YBX2      | 0.20  | 0.000119717 | 7.71E-03 |
| cg15571730 | 7  | 99680278  | ZNF3      | 0.23  | 0.000119731 | 7.71E-03 |
| cg26611765 | 7  | 27199916  |           | -0.23 | 0.000120361 | 7.74E-03 |
| cg04908380 | 1  | 47915862  |           | 0.23  | 0.000120512 | 7.75E-03 |
| cg13776285 | 6  | 108490264 | NR2E1     | 0.23  | 0.00012074  | 7.76E-03 |
| cg21938179 | 3  | 103930387 | MIR548A3  | -0.20 | 0.000120783 | 7.76E-03 |
| cg20156240 | 7  | 25891970  |           | 0.26  | 0.00012097  | 7.77E-03 |
| cg16595261 | 2  | 242823679 |           | 0.21  | 0.00012129  | 7.79E-03 |
| cg14160518 | 20 | 50418952  | SALL4     | 0.23  | 0.000121519 | 7.80E-03 |
| cg02658690 | 13 | 110885846 | COL4A1    | -0.24 | 0.000121545 | 7.80E-03 |
| cg07419021 | 2  | 162274436 | TBR1      | 0.21  | 0.000121852 | 7.81E-03 |
| cg06660332 | 1  | 47009707  |           | 0.22  | 0.000122018 | 7.81E-03 |
| cg05268203 | 2  | 118981748 |           | 0.25  | 0.000122368 | 7.83E-03 |
| cg00293245 | 11 | 94884652  |           | 0.21  | 0.000122653 | 7.84E-03 |
| cg18866529 | 15 | 62359103  | C2CD4A    | 0.23  | 0.000122845 | 7.85E-03 |
| cg13422850 | 9  | 135116388 | NTNG2     | 0.22  | 0.00012347  | 7.87E-03 |
| cg17544177 | 10 | 103589245 | KCNIP2    | 0.21  | 0.000123494 | 7.87E-03 |
| cg11088422 | 17 | 42392697  | RUNDC3A   | 0.20  | 0.000123615 | 7.88E-03 |
| cg21269897 | 6  | 27107002  | HIST1H2BK | 0.24  | 0.000124191 | 7.91E-03 |
| cg10268509 | 16 | 89120300  |           | -0.21 | 0.000125376 | 7.96E-03 |
| cg06264984 | 2  | 38300885  | CYP1B1    | 0.22  | 0.000126112 | 8.00E-03 |
| cg03576469 | 19 | 46917061  | CCDC8     | 0.25  | 0.00012618  | 8.00E-03 |
| cg11931762 | 20 | 9488920   |           | 0.20  | 0.000126673 | 8.02E-03 |
| cg14144305 | 11 | 44325960  | ALX4      | 0.22  | 0.000126781 | 8.02E-03 |
| cg02469871 | 12 | 103218581 |           | 0.25  | 0.000127024 | 8.03E-03 |
| cg26444951 | 4  | 13530269  |           | 0.23  | 0.000127453 | 8.05E-03 |
| cg02613827 | 4  | 41754857  |           | 0.23  | 0.000127576 | 8.05E-03 |
| cg01089319 | 2  | 171676809 | GAD1      | 0.21  | 0.000128701 | 8.10E-03 |
| cg25036779 | 6  | 1615236   |           | 0.21  | 0.000128961 | 8.11E-03 |
| cg20285974 | 11 | 526362    |           | -0.23 | 0.00012898  | 8.11E-03 |
| cg16996144 | 1  | 67217950  | TCTEX1D1  | 0.21  | 0.000129045 | 8.11E-03 |
| cg23713176 | 4  | 134074369 | PCDH10    | 0.20  | 0.000129052 | 8.11E-03 |
| cg13945224 | 9  | 98111970  |           | 0.21  | 0.000129086 | 8.11E-03 |
| cg14882265 | 7  | 27184375  | HOXA5     | 0.20  | 0.000129531 | 8.12E-03 |
| cg07190012 | 11 | 16633647  |           | 0.21  | 0.000129675 | 8.12E-03 |
| cg10818833 | 12 | 99139797  | ANKS1B    | 0.20  | 0.000129752 | 8.12E-03 |
| cg26724949 | 16 | 86610230  |           | 0.25  | 0.000129801 | 8.13E-03 |
| cg05833851 | 13 | 100548910 | CLYBL     | 0.26  | 0.000130044 | 8.14E-03 |
| cg16368146 | 6  | 29943425  | HCG9      | 0.20  | 0.000130533 | 8.16E-03 |
| cg20403557 | 5  | 115299088 | LVRN      | 0.21  | 0.000130771 | 8.17E-03 |
| cg22009488 | 5  | 172656166 |           | 0.27  | 0.000130987 | 8.18E-03 |
| cg04977834 | 17 | 70114623  |           | 0.21  | 0.000131998 | 8.22E-03 |
| cg16718760 | 3  | 55721067  | ERC2      | -0.21 | 0.000132159 | 8.23E-03 |
| cg09813525 | 13 | 53420386  | PCDH8     | 0.22  | 0.000133556 | 8.28E-03 |
| cg22511262 | 11 | 32455192  | WT1       | 0.24  | 0.000133828 | 8.30E-03 |
| cg20941258 | 3  | 46618668  | LRRC2     | 0.21  | 0.000134059 | 8.31E-03 |
| cg01747862 | 4  | 174457371 | NBLA00301 | 0.23  | 0.000134099 | 8.31E-03 |

|            |    |           |          |       |             |          |
|------------|----|-----------|----------|-------|-------------|----------|
| cg04555312 | 12 | 54389114  |          | 0.20  | 0.000134545 | 8.33E-03 |
| cg13623495 | 6  | 10426099  |          | 0.24  | 0.000134609 | 8.33E-03 |
| cg22557662 | 19 | 38747374  | PPP1R14A | 0.24  | 0.000134681 | 8.33E-03 |
| cg22425474 | 6  | 29818086  |          | 0.23  | 0.000134682 | 8.33E-03 |
| cg20382146 | 13 | 100617055 | ZIC5     | 0.23  | 0.000134868 | 8.34E-03 |
| cg04137405 | 14 | 62414451  |          | -0.21 | 0.000134976 | 8.34E-03 |
| cg07721569 | 6  | 10420287  | TFAP2A   | 0.24  | 0.000135467 | 8.37E-03 |
| cg10568624 | 9  | 100619991 |          | 0.26  | 0.00013569  | 8.37E-03 |
| cg05474605 | 5  | 42812244  | SEPP1    | -0.22 | 0.000135721 | 8.37E-03 |
| cg16904960 | 2  | 182549928 |          | 0.20  | 0.000135926 | 8.38E-03 |
| cg24146331 | 10 | 102590225 |          | 0.23  | 0.000135951 | 8.38E-03 |
| cg26864230 | 1  | 47911508  |          | 0.23  | 0.000136709 | 8.41E-03 |
| cg05297666 | 11 | 128400310 | ETS1     | -0.22 | 0.000136744 | 8.41E-03 |
| cg20785459 | 11 | 5265155   | HBBP1    | -0.25 | 0.000137467 | 8.45E-03 |
| cg24947764 | 4  | 41881359  |          | 0.24  | 0.000137891 | 8.47E-03 |
| cg23032993 | 2  | 3128880   |          | -0.21 | 0.000137996 | 8.47E-03 |
| cg08082788 | 14 | 101618406 |          | -0.21 | 0.000138057 | 8.47E-03 |
| cg04194947 | 2  | 177012191 |          | 0.22  | 0.000138602 | 8.49E-03 |
| cg00539908 | 2  | 152954216 | CACNB4   | 0.20  | 0.000138698 | 8.49E-03 |
| cg24798398 | 2  | 176937524 |          | 0.22  | 0.000138832 | 8.49E-03 |
| cg17014009 | 2  | 152954970 | CACNB4   | 0.20  | 0.00013885  | 8.49E-03 |
| cg24399712 | 22 | 39784796  |          | 0.21  | 0.000139813 | 8.54E-03 |
| cg11627582 | 19 | 30938273  | ZNF536   | 0.20  | 0.000140143 | 8.55E-03 |
| cg14189391 | 2  | 25527347  | DNMT3A   | 0.21  | 0.000140311 | 8.56E-03 |
| cg17684657 | 6  | 10886967  | SYCP2L   | 0.23  | 0.000140823 | 8.59E-03 |
| cg26090775 | 11 | 16633582  |          | 0.24  | 0.000141001 | 8.60E-03 |
| cg00457403 | 3  | 187387734 | SST      | 0.22  | 0.000141243 | 8.60E-03 |
| cg04897683 | 5  | 134871462 | NEUROG1  | 0.23  | 0.000141482 | 8.61E-03 |
| cg06530490 | 2  | 118981783 |          | 0.26  | 0.000141581 | 8.61E-03 |
| cg05155043 | 2  | 220196620 | RESP18   | 0.21  | 0.000141804 | 8.62E-03 |
| cg19476053 | 2  | 223167463 | CCDC140  | 0.21  | 0.000142063 | 8.63E-03 |
| cg15555527 | 4  | 80885981  | ANTXR2   | 0.21  | 0.000142705 | 8.66E-03 |
| cg19522467 | 12 | 10270398  | CLEC7A   | -0.21 | 0.000143056 | 8.67E-03 |
| cg00471645 | 2  | 11270192  |          | 0.20  | 0.000143206 | 8.67E-03 |
| cg14072515 | 10 | 125732604 |          | 0.21  | 0.000143305 | 8.68E-03 |
| cg00876273 | 10 | 94452311  | HHEX     | 0.20  | 0.000143447 | 8.68E-03 |
| cg05770946 | 6  | 100901371 | SIM1     | 0.21  | 0.000143968 | 8.70E-03 |
| cg12276123 | 2  | 155555157 | KCNJ3    | 0.23  | 0.000144332 | 8.71E-03 |
| cg05901765 | 5  | 68710818  | MARVELD2 | 0.22  | 0.00014443  | 8.71E-03 |
| cg17545418 | 16 | 56709853  | MT1IP    | 0.21  | 0.000144439 | 8.71E-03 |
| cg11747081 | 13 | 76444823  |          | -0.24 | 0.000144893 | 8.73E-03 |
| cg01532771 | 19 | 7827560   | CLEC4M   | -0.22 | 0.00014506  | 8.74E-03 |
| cg19883813 | 10 | 8098005   | GATA3    | 0.22  | 0.000145118 | 8.74E-03 |
| cg08371772 | 19 | 42828621  | MEGF8    | 0.25  | 0.000145932 | 8.77E-03 |
| cg08750504 | 2  | 172946193 |          | 0.21  | 0.000146214 | 8.78E-03 |
| cg24401870 | 13 | 70682525  | KLHL1    | 0.20  | 0.000146777 | 8.80E-03 |
| cg01574513 | 16 | 85981720  |          | 0.23  | 0.000146839 | 8.81E-03 |
| cg06702880 | 4  | 155663094 |          | 0.21  | 0.000148017 | 8.85E-03 |
| cg13512268 | 7  | 27183973  | HOXA5    | 0.21  | 0.000148064 | 8.85E-03 |
| cg22682811 | 20 | 21372462  |          | 0.24  | 0.000148123 | 8.85E-03 |
| cg08188903 | 14 | 100680826 |          | 0.23  | 0.000148635 | 8.87E-03 |
| cg22473770 | 17 | 29647977  | EVI2A    | -0.21 | 0.000149509 | 8.91E-03 |
| cg02120658 | 2  | 223160297 | PAX3     | 0.21  | 0.000150071 | 8.94E-03 |
| cg01840333 | 6  | 26225767  | HIST1H3E | 0.22  | 0.000150418 | 8.95E-03 |
| cg17039236 | 18 | 77548049  |          | 0.24  | 0.000150495 | 8.95E-03 |
| cg00934355 | 9  | 1049244   | DMRT2    | 0.24  | 0.000150672 | 8.95E-03 |
| cg13574488 | 10 | 119306246 | EMX2     | 0.24  | 0.000152117 | 9.01E-03 |
| cg02955548 | 13 | 108028239 | FAM155A  | -0.20 | 0.000152585 | 9.02E-03 |
| cg23793213 | 6  | 30039006  | RNF39    | 0.25  | 0.000152993 | 9.04E-03 |
| cg02668248 | 19 | 16437789  | KLF2     | 0.23  | 0.000153016 | 9.04E-03 |
| cg26303165 | 1  | 228401758 | OBSCN    | 0.25  | 0.000153462 | 9.06E-03 |
| cg24534742 | 13 | 43149281  | TNFSF11  | 0.22  | 0.000154032 | 9.09E-03 |
| cg16997642 | 7  | 27184159  | HOXA5    | 0.24  | 0.000154355 | 9.10E-03 |
| cg17814014 | 10 | 134119998 | STK32C   | -0.20 | 0.000154792 | 9.12E-03 |
| cg20314548 | 15 | 74426273  | ISLR2    | 0.20  | 0.000155456 | 9.14E-03 |
| cg06215107 | 4  | 151504725 | LRBA     | 0.21  | 0.000155947 | 9.15E-03 |

|            |    |           |          |       |             |          |
|------------|----|-----------|----------|-------|-------------|----------|
| cg14845689 | 10 | 119306193 | EMX2     | 0.20  | 0.000156121 | 9.16E-03 |
| cg07691152 | 12 | 103355123 |          | 0.21  | 0.000156134 | 9.16E-03 |
| cg08832220 | 3  | 55516184  | WNT5A    | 0.23  | 0.000156286 | 9.16E-03 |
| cg06014958 | 6  | 10425553  |          | 0.23  | 0.000156294 | 9.16E-03 |
| cg15339231 | 7  | 96650407  | DLX5     | 0.23  | 0.000156702 | 9.18E-03 |
| cg21249376 | 9  | 27528432  | MOBKL2B  | 0.21  | 0.000157131 | 9.19E-03 |
| cg10474712 | 22 | 42062693  |          | 0.22  | 0.000157864 | 9.23E-03 |
| cg08866876 | 8  | 20170359  |          | -0.21 | 0.000158561 | 9.25E-03 |
| cg10574365 | 1  | 32054836  |          | 0.20  | 0.000158677 | 9.26E-03 |
| cg11306628 | 7  | 560119    | PDGFA    | 0.22  | 0.000158735 | 9.26E-03 |
| cg13060157 | 1  | 113286610 |          | 0.23  | 0.000158928 | 9.27E-03 |
| cg20916523 | 3  | 10184584  | VHL      | 0.23  | 0.000158974 | 9.27E-03 |
| cg06464008 | 10 | 102881508 | TLX1NB   | 0.24  | 0.000159205 | 9.27E-03 |
| cg00347563 | 1  | 78511600  | GIPC2    | 0.25  | 0.000159456 | 9.28E-03 |
| cg01488770 | 17 | 59474078  |          | 0.24  | 0.000159893 | 9.30E-03 |
| cg05650260 | 6  | 50692762  | TFAP2D   | 0.23  | 0.000160079 | 9.30E-03 |
| cg14298457 | 2  | 177012117 |          | 0.22  | 0.000160112 | 9.30E-03 |
| cg18746336 | 3  | 128216122 |          | 0.22  | 0.000160196 | 9.30E-03 |
| cg13936452 | 1  | 47911336  |          | 0.24  | 0.000160231 | 9.30E-03 |
| cg12127282 | 2  | 177014685 | HOXD4    | 0.21  | 0.00016063  | 9.32E-03 |
| cg00126148 | 4  | 111533517 |          | 0.23  | 0.00016197  | 9.36E-03 |
| cg20090108 | 11 | 88242488  | GRM5     | 0.22  | 0.00016263  | 9.39E-03 |
| cg25901381 | 7  | 27225485  | HOXA11AS | 0.21  | 0.000163054 | 9.41E-03 |
| cg23244913 | 6  | 29943401  | HCG9     | 0.22  | 0.000163093 | 9.41E-03 |
| cg21144922 | 1  | 109204168 | C1orf59  | 0.23  | 0.000163217 | 9.41E-03 |
| cg14947429 | 10 | 28036151  | MKX      | 0.22  | 0.000164581 | 9.47E-03 |
| cg08297751 | 4  | 174448705 | HAND2    | 0.23  | 0.000164645 | 9.47E-03 |
| cg19554457 | 12 | 93774772  | NUDT4    | 0.22  | 0.000164802 | 9.48E-03 |
| cg08506931 | 2  | 223168861 | CCDC140  | 0.21  | 0.000165494 | 9.51E-03 |
| cg21275135 | 6  | 99273679  |          | 0.21  | 0.000165707 | 9.52E-03 |
| cg02798576 | 10 | 101290168 |          | 0.25  | 0.000165781 | 9.52E-03 |
| cg23845450 | 1  | 75597887  | LHX8     | 0.25  | 0.000166081 | 9.52E-03 |
| cg27299406 | 2  | 43020013  | HAAO     | 0.21  | 0.000167128 | 9.56E-03 |
| cg05379541 | 7  | 27252541  |          | 0.20  | 0.000167418 | 9.57E-03 |
| cg10413944 | 2  | 224702734 | AP1S3    | 0.25  | 0.000167654 | 9.57E-03 |
| cg13916459 | 12 | 85673221  | ALX1     | 0.24  | 0.000167817 | 9.58E-03 |
| cg25310592 | 11 | 5174413   | OR52A1   | -0.24 | 0.000168286 | 9.59E-03 |
| cg27587125 | 1  | 109204207 | C1orf59  | 0.24  | 0.000168436 | 9.60E-03 |
| cg13834146 | 15 | 77927305  |          | 0.22  | 0.000169156 | 9.63E-03 |
| cg08941355 | 7  | 27133106  | HOXA1    | 0.22  | 0.000169436 | 9.64E-03 |
| cg00868875 | 18 | 24127237  | KCTD1    | 0.26  | 0.000169958 | 9.66E-03 |
| cg03709307 | 17 | 37760652  | NEUROD2  | 0.20  | 0.000170028 | 9.66E-03 |
| cg18775634 | 3  | 27755341  |          | 0.26  | 0.000170083 | 9.66E-03 |
| cg06393354 | 1  | 248366332 | OR2M3    | -0.20 | 0.000170357 | 9.68E-03 |
| cg09765089 | 7  | 27291346  |          | 0.23  | 0.000170359 | 9.68E-03 |
| cg12174804 | 8  | 18244861  |          | 0.24  | 0.000171894 | 9.75E-03 |
| cg26846424 | 1  | 3310103   | PRDM16   | 0.21  | 0.000172098 | 9.76E-03 |
| cg05529816 | 17 | 4802735   | CHRNE    | 0.23  | 0.000172755 | 9.79E-03 |
| cg13681468 | 4  | 90227879  | GPRIN3   | 0.20  | 0.00017372  | 9.83E-03 |
| cg07540421 | 2  | 71115680  |          | 0.23  | 0.000174591 | 9.86E-03 |
| cg00681106 | 1  | 75599532  | LHX8     | 0.22  | 0.000175242 | 9.88E-03 |
| cg12002303 | 15 | 68113478  |          | 0.23  | 0.000175433 | 9.89E-03 |
| cg08582485 | 20 | 22557518  | C20orf56 | 0.23  | 0.00017566  | 9.90E-03 |
| cg00187686 | 11 | 59634218  | TCN1     | -0.23 | 0.000176119 | 9.91E-03 |
| cg26078436 | 11 | 5265992   | HBBP1    | -0.20 | 0.000176199 | 9.92E-03 |
| cg18862481 | 3  | 129693370 | TRH      | 0.26  | 0.000176649 | 9.93E-03 |
| cg03026373 | 17 | 36715787  | SRCIN1   | 0.25  | 0.000177176 | 9.95E-03 |
| cg02185052 | 10 | 94452480  | HHEX     | 0.20  | 0.000177283 | 9.95E-03 |
| cg14925024 | 1  | 228291705 | C1orf35  | -0.20 | 0.000177396 | 9.95E-03 |
| cg08243612 | 2  | 219763536 |          | 0.21  | 0.000177449 | 9.95E-03 |
| cg05768558 | 1  | 26737005  | LIN28    | 0.20  | 0.000177717 | 9.96E-03 |
| cg05774229 | 11 | 76033097  |          | 0.20  | 0.000178261 | 9.98E-03 |
| cg14218275 | 10 | 11047435  | CUGBP2   | 0.24  | 0.000178556 | 1.00E-02 |
| cg00325866 | 15 | 62359130  | C2CD4A   | 0.22  | 0.000179097 | 1.00E-02 |
| cg03656099 | 17 | 59481954  | TBX2     | 0.24  | 0.000179244 | 1.00E-02 |
| cg06606199 | 12 | 115174773 |          | 0.22  | 0.000179682 | 1.00E-02 |

|            |    |           |           |       |             |          |
|------------|----|-----------|-----------|-------|-------------|----------|
| cg27258399 | 8  | 38832267  | HTRA4     | 0.20  | 0.000179858 | 1.00E-02 |
| cg04079760 | 16 | 68269694  | ESRP2     | 0.22  | 0.000180202 | 1.01E-02 |
| cg14185918 | 9  | 110249966 | KLF4      | 0.21  | 0.000180411 | 1.01E-02 |
| cg04134240 | 14 | 100680625 |           | 0.22  | 0.000181046 | 1.01E-02 |
| cg16386396 | 1  | 3132458   | PRDM16    | -0.21 | 0.000181704 | 1.01E-02 |
| cg11809668 | 4  | 154435522 | KIAA0922  | -0.24 | 0.00018178  | 1.01E-02 |
| cg19204131 | 6  | 10385320  |           | 0.24  | 0.000181938 | 1.01E-02 |
| cg14658493 | 7  | 27184077  | HOXA5     | 0.21  | 0.000182025 | 1.01E-02 |
| cg03448548 | 16 | 33604228  |           | 0.20  | 0.000182468 | 1.01E-02 |
| cg06422471 | 22 | 51169500  | SHANK3    | 0.20  | 0.000183    | 1.01E-02 |
| cg19143639 | 8  | 66472813  |           | 0.21  | 0.000183489 | 1.02E-02 |
| cg26720125 | 21 | 38077673  | SIM2      | 0.22  | 0.000184056 | 1.02E-02 |
| cg04621893 | 10 | 22624687  |           | 0.23  | 0.000184174 | 1.02E-02 |
| cg10638793 | 3  | 169027604 | MECOM     | -0.22 | 0.000184561 | 1.02E-02 |
| cg15655935 | 11 | 59815177  | PLAC1L    | -0.24 | 0.00018539  | 1.02E-02 |
| cg25304107 | 2  | 177017331 | HOXD4     | 0.21  | 0.000185443 | 1.02E-02 |
| cg27148952 | 6  | 49518347  | C6orf141  | 0.21  | 0.000185686 | 1.02E-02 |
| cg17651821 | 6  | 27841683  | HIST1H4L  | 0.24  | 0.000185869 | 1.02E-02 |
| cg19237691 | 1  | 1141617   | TNFRSF18  | 0.23  | 0.000185899 | 1.02E-02 |
| cg06418871 | 5  | 68710831  | MARVELD2  | 0.22  | 0.000186008 | 1.02E-02 |
| cg12571423 | 13 | 37006748  | CCNA1     | 0.20  | 0.000186126 | 1.02E-02 |
| cg26043322 | 1  | 159507162 | OR10J5    | -0.20 | 0.000186499 | 1.03E-02 |
| cg16520288 | 12 | 58014857  | SLC26A10  | 0.22  | 0.000186535 | 1.03E-02 |
| cg06813578 | 15 | 51386254  | TNFAIP8L3 | 0.23  | 0.000186844 | 1.03E-02 |
| cg20899581 | 6  | 27841230  | HIST1H4L  | 0.21  | 0.000186908 | 1.03E-02 |
| cg12055395 | 7  | 96642605  | DLX6AS    | 0.23  | 0.000186934 | 1.03E-02 |
| cg13647052 | 12 | 2800382   | CACNA1C   | 0.21  | 0.000187501 | 1.03E-02 |
| cg25158147 | 10 | 54073150  | DKK1      | 0.22  | 0.000187574 | 1.03E-02 |
| cg12015737 | 7  | 27184030  | HOXA5     | 0.24  | 0.000188415 | 1.03E-02 |
| cg21251125 | 9  | 126771781 |           | 0.21  | 0.000188476 | 1.03E-02 |
| cg05131488 | 7  | 14031822  | ETV1      | -0.23 | 0.000190125 | 1.04E-02 |
| cg03074925 | 6  | 10425625  |           | 0.21  | 0.000190273 | 1.04E-02 |
| cg22078710 | 15 | 53087599  |           | 0.21  | 0.000190647 | 1.04E-02 |
| cg02924487 | 1  | 3649344   | TP73      | 0.20  | 0.000191625 | 1.04E-02 |
| cg11294513 | 19 | 58220295  | ZNF154    | 0.22  | 0.000191921 | 1.04E-02 |
| cg08292023 | 11 | 88242253  | GRM5      | 0.22  | 0.000193241 | 1.05E-02 |
| cg06710082 | 6  | 29943408  | HCG9      | 0.22  | 0.000193438 | 1.05E-02 |
| cg08962452 | 12 | 54366816  | HOXC11    | 0.21  | 0.000193613 | 1.05E-02 |
| cg02636041 | 10 | 43698008  | RASGEF1A  | 0.26  | 0.000194123 | 1.05E-02 |
| cg17485021 | 4  | 13530094  |           | 0.25  | 0.000194166 | 1.05E-02 |
| cg20278291 | 14 | 57272340  | OTX2      | 0.23  | 0.000194398 | 1.05E-02 |
| cg19909865 | 4  | 134074421 | PCDH10    | 0.22  | 0.000194496 | 1.05E-02 |
| cg19643053 | 7  | 27184271  | HOXA5     | 0.23  | 0.000194533 | 1.05E-02 |
| cg23806894 | 4  | 111535528 |           | 0.27  | 0.000195498 | 1.06E-02 |
| cg11145302 | 10 | 134556533 | INPP5A    | -0.21 | 0.00019571  | 1.06E-02 |
| cg25399352 | 12 | 114837572 | TBX5      | 0.22  | 0.000196747 | 1.06E-02 |
| cg04797936 | 12 | 49659154  | TUBA1C    | 0.21  | 0.000197177 | 1.06E-02 |
| cg10828127 | 21 | 41550814  | DSCAM     | 0.22  | 0.000198241 | 1.07E-02 |
| cg17163168 | 1  | 3600735   | TP73      | 0.20  | 0.000199078 | 1.07E-02 |
| cg15984661 | 19 | 46916520  | CCDC8     | 0.23  | 0.000199191 | 1.07E-02 |
| cg14184866 | 9  | 82185137  |           | 0.21  | 0.000199708 | 1.07E-02 |
| cg02365780 | 2  | 101437872 | NPAS2     | 0.20  | 0.000199796 | 1.07E-02 |
| cg25458175 | 19 | 59025570  | ZBTB45    | 0.22  | 0.000200347 | 1.07E-02 |
| cg05026135 | 19 | 30713427  |           | 0.20  | 0.000200666 | 1.07E-02 |
| cg23810282 | 5  | 43037519  |           | 0.23  | 0.000200979 | 1.07E-02 |
| cg18676790 | 7  | 97680731  |           | 0.20  | 0.000201693 | 1.08E-02 |
| cg13557804 | 6  | 33117976  |           | -0.23 | 0.000201734 | 1.08E-02 |
| cg19318393 | 1  | 223936508 | CAPN2     | 0.25  | 0.0002018   | 1.08E-02 |
| cg26667091 | 11 | 65352232  | EHBP1L1   | 0.21  | 0.000202092 | 1.08E-02 |
| cg20755170 | 5  | 145720024 | POU4F3    | 0.20  | 0.000202444 | 1.08E-02 |
| cg10386298 | 1  | 221050491 |           | 0.20  | 0.000202787 | 1.08E-02 |
| cg09481404 | 15 | 53087316  |           | 0.20  | 0.000203089 | 1.08E-02 |
| cg12851717 | 13 | 100517009 | CLYBL     | 0.25  | 0.000203552 | 1.08E-02 |
| cg04309093 | 14 | 92980608  | RIN3      | 0.21  | 0.000203864 | 1.08E-02 |
| cg07304175 | 3  | 181414139 | SOX2OT    | 0.21  | 0.000204243 | 1.08E-02 |
| cg18537730 | 19 | 49250080  | IZUMO1    | 0.22  | 0.000204532 | 1.08E-02 |

|            |    |           |           |       |             |          |
|------------|----|-----------|-----------|-------|-------------|----------|
| cg15279308 | 12 | 2800500   | CACNA1C   | 0.22  | 0.00020503  | 1.09E-02 |
| cg18356785 | 11 | 47611780  | C1QTNF4   | 0.23  | 0.000205474 | 1.09E-02 |
| cg03898577 | 5  | 140787013 | PCDHGA4   | 0.21  | 0.000205934 | 1.09E-02 |
| cg02622316 | 6  | 28367410  | ZSCAN12   | 0.22  | 0.000206071 | 1.09E-02 |
| cg14560430 | 3  | 32863175  | TRIM71    | 0.23  | 0.00020743  | 1.10E-02 |
| cg15296664 | 12 | 89748773  |           | 0.22  | 0.000207465 | 1.10E-02 |
| cg16328007 | 1  | 41119988  | RIMS3     | 0.22  | 0.000207943 | 1.10E-02 |
| cg25984050 | 4  | 13530357  |           | 0.21  | 0.000208251 | 1.10E-02 |
| cg10343447 | 16 | 68544200  |           | 0.25  | 0.000209556 | 1.10E-02 |
| cg09533428 | 6  | 30038897  | RNF39     | 0.20  | 0.000211082 | 1.11E-02 |
| cg09748975 | 4  | 4864532   | MSX1      | 0.23  | 0.000211488 | 1.11E-02 |
| cg06799422 | 15 | 41952235  | MGA       | 0.21  | 0.00021175  | 1.11E-02 |
| cg14058329 | 7  | 27183946  | HOXA5     | 0.20  | 0.000211808 | 1.11E-02 |
| cg23267558 | 13 | 70682604  | KLHL1     | 0.21  | 0.000212624 | 1.11E-02 |
| cg19250799 | 1  | 47910456  |           | 0.23  | 0.000213304 | 1.11E-02 |
| cg18698431 | 12 | 105956397 |           | -0.20 | 0.000214511 | 1.12E-02 |
| cg07046369 | 10 | 102586254 | PAX2      | 0.23  | 0.000214663 | 1.12E-02 |
| cg18343292 | 11 | 60146078  | MS4A7     | -0.22 | 0.000215156 | 1.12E-02 |
| cg03102494 | 1  | 147801721 |           | 0.21  | 0.000215652 | 1.12E-02 |
| cg07260927 | 4  | 11428822  | HS3ST1    | 0.21  | 0.000217263 | 1.13E-02 |
| cg04603812 | 16 | 1429265   | UNKL      | 0.21  | 0.000217584 | 1.13E-02 |
| cg22702772 | 3  | 48699012  | CELSR3    | 0.20  | 0.000217725 | 1.13E-02 |
| cg19049194 | 2  | 175193754 |           | 0.21  | 0.000217985 | 1.13E-02 |
| cg01089498 | 4  | 11428985  | HS3ST1    | 0.24  | 0.000218614 | 1.13E-02 |
| cg22134372 | 15 | 52455211  | GNB5      | -0.23 | 0.000219424 | 1.13E-02 |
| cg14601621 | 9  | 97848457  | C9orf3    | -0.22 | 0.000220195 | 1.13E-02 |
| cg02553516 | 21 | 38078767  | SIM2      | 0.21  | 0.000220549 | 1.14E-02 |
| cg14227486 | 4  | 41867415  |           | 0.25  | 0.000221298 | 1.14E-02 |
| cg07615497 | 4  | 147554144 |           | 0.21  | 0.000221418 | 1.14E-02 |
| cg12905085 | 1  | 32054510  |           | 0.22  | 0.000221762 | 1.14E-02 |
| cg07126525 | 6  | 166218519 |           | 0.24  | 0.00022214  | 1.14E-02 |
| cg04294437 | 16 | 50875204  |           | 0.22  | 0.000223004 | 1.14E-02 |
| cg09124518 | 10 | 134119682 | STK32C    | -0.22 | 0.000224378 | 1.15E-02 |
| cg03607708 | 1  | 215966091 | USH2A     | 0.20  | 0.000225674 | 1.15E-02 |
| cg12408601 | 6  | 27841665  | HIST1H4L  | 0.24  | 0.000226603 | 1.16E-02 |
| cg20611680 | 1  | 16554171  |           | 0.21  | 0.000226762 | 1.16E-02 |
| cg01141459 | 22 | 30476452  | HORMAD2   | 0.21  | 0.00022945  | 1.17E-02 |
| cg01738522 | 4  | 8690035   |           | 0.20  | 0.000229903 | 1.17E-02 |
| cg04074010 | 10 | 130227803 |           | -0.20 | 0.000233685 | 1.18E-02 |
| cg11265749 | 7  | 560499    | PDGFA     | 0.21  | 0.000233792 | 1.18E-02 |
| cg12349884 | 6  | 27106988  | HIST1H2BK | 0.25  | 0.000234246 | 1.18E-02 |
| cg00455424 | 1  | 65468815  |           | 0.24  | 0.000235476 | 1.18E-02 |
| cg13492103 | 1  | 75596827  | LHX8      | 0.21  | 0.000236236 | 1.19E-02 |
| cg13364230 | 1  | 35258779  | GJA4      | 0.21  | 0.000236779 | 1.19E-02 |
| cg02331910 | 1  | 153599831 | S100A13   | 0.21  | 0.000237588 | 1.19E-02 |
| cg17400476 | 7  | 27231491  |           | 0.22  | 0.000238997 | 1.19E-02 |
| cg18610930 | 21 | 46237456  | SUMO3     | 0.22  | 0.00023965  | 1.20E-02 |
| cg16786102 | 4  | 41867462  |           | 0.22  | 0.000239798 | 1.20E-02 |
| cg08390877 | 2  | 119615998 |           | 0.24  | 0.000240198 | 1.20E-02 |
| cg26092675 | 6  | 26225258  | HIST1H3E  | 0.27  | 0.000240241 | 1.20E-02 |
| cg17446896 | 6  | 27841633  | HIST1H4L  | 0.23  | 0.000240908 | 1.20E-02 |
| cg08793877 | 2  | 71115994  |           | 0.21  | 0.000240991 | 1.20E-02 |
| cg26668276 | 7  | 96633311  | DLX6AS    | 0.23  | 0.000241346 | 1.20E-02 |
| cg09780241 | 4  | 111535597 |           | 0.27  | 0.00024257  | 1.21E-02 |
| cg25541968 | 11 | 7848142   | OR5P3     | -0.22 | 0.000244252 | 1.21E-02 |
| cg03043296 | 15 | 83349420  | AP3B2     | 0.20  | 0.000244573 | 1.21E-02 |
| cg02571816 | 19 | 38747378  | PPP1R14A  | 0.21  | 0.00024525  | 1.22E-02 |
| cg16933440 | 3  | 157217435 | VEPH1     | 0.23  | 0.000245666 | 1.22E-02 |
| cg18157027 | 1  | 228400693 | OBSCN     | 0.21  | 0.000245771 | 1.22E-02 |
| cg09784307 | 15 | 75248768  | RPP25     | 0.22  | 0.000246437 | 1.22E-02 |
| cg22969763 | 12 | 10607538  | KLRC1     | -0.22 | 0.00024783  | 1.22E-02 |
| cg24932457 | 1  | 175568559 | TNR       | 0.24  | 0.000247956 | 1.22E-02 |
| cg21587238 | 5  | 42953590  |           | 0.25  | 0.000249263 | 1.23E-02 |
| cg25320749 | 6  | 28494732  | GPX5      | -0.21 | 0.000252028 | 1.23E-02 |
| cg21611810 | 12 | 114841870 | TBX5      | 0.22  | 0.00025284  | 1.24E-02 |
| cg18211066 | 17 | 75956222  |           | 0.23  | 0.000252974 | 1.24E-02 |

|            |    |           |          |       |             |          |
|------------|----|-----------|----------|-------|-------------|----------|
| cg25957967 | 1  | 55505148  | PCSK9    | 0.21  | 0.000254387 | 1.24E-02 |
| cg16312002 | 1  | 16554558  |          | 0.21  | 0.000255129 | 1.24E-02 |
| cg21968580 | 1  | 78470640  | DNAJB4   | 0.23  | 0.000255161 | 1.24E-02 |
| cg25628429 | 11 | 50005457  | OR4C12   | -0.21 | 0.000255492 | 1.25E-02 |
| cg18494190 | 10 | 102589532 | PAX2     | 0.23  | 0.000257141 | 1.25E-02 |
| cg11784990 | 12 | 103218665 |          | 0.23  | 0.000258188 | 1.25E-02 |
| cg12621514 | 10 | 54073047  | DKK1     | 0.24  | 0.000258748 | 1.26E-02 |
| cg24804544 | 7  | 6544107   | GRID2IP  | 0.26  | 0.000262608 | 1.27E-02 |
| cg06419850 | 17 | 4688683   | VMO1     | 0.22  | 0.000262948 | 1.27E-02 |
| cg21007852 | 7  | 27203546  | HOXA9    | -0.20 | 0.00026813  | 1.28E-02 |
| cg22784386 | 6  | 100903817 | SIM1     | 0.22  | 0.000268513 | 1.28E-02 |
| cg18757468 | 11 | 65352168  | EHBP1L1  | 0.22  | 0.000268781 | 1.28E-02 |
| cg15706223 | 1  | 1141934   | TNFRSF18 | 0.21  | 0.000269076 | 1.29E-02 |
| cg14098847 | 14 | 101923218 |          | 0.20  | 0.000269121 | 1.29E-02 |
| cg18425434 | 10 | 118429648 | C10orf82 | 0.22  | 0.00027049  | 1.29E-02 |
| cg01920334 | 21 | 48087978  |          | 0.22  | 0.000270542 | 1.29E-02 |
| cg24292761 | 6  | 117584665 |          | 0.21  | 0.000272795 | 1.30E-02 |
| cg27095915 | 6  | 1624442   | GMDS     | 0.24  | 0.000275237 | 1.30E-02 |
| cg03928961 | 3  | 196693980 | PIGZ     | 0.23  | 0.000275397 | 1.30E-02 |
| cg25365934 | 10 | 77155376  |          | 0.23  | 0.000275898 | 1.31E-02 |
| cg04268624 | 5  | 43037285  |          | 0.23  | 0.000276746 | 1.31E-02 |
| cg04838988 | 8  | 70984437  | PRDM14   | 0.22  | 0.000276754 | 1.31E-02 |
| cg18384926 | 15 | 45722598  | C15orf48 | 0.22  | 0.000277897 | 1.31E-02 |
| cg14509403 | 22 | 30476281  | HORMAD2  | 0.22  | 0.000278267 | 1.31E-02 |
| cg27017658 | 14 | 21093081  |          | 0.22  | 0.000278742 | 1.32E-02 |
| cg19216792 | 7  | 26897202  | SKAP2    | 0.21  | 0.000279543 | 1.32E-02 |
| cg17536595 | 6  | 43612908  | RSPH9    | 0.21  | 0.000282299 | 1.33E-02 |
| cg23238231 | 18 | 22928586  | ZNF521   | 0.21  | 0.000282481 | 1.33E-02 |
| cg06059069 | 15 | 32964277  | SCG5     | -0.21 | 0.000283051 | 1.33E-02 |
| cg25800765 | 12 | 85673347  | ALX1     | 0.23  | 0.000284669 | 1.33E-02 |
| cg27205487 | 21 | 17961996  | C21orf34 | -0.23 | 0.000285913 | 1.34E-02 |
| cg09264282 | 1  | 86622395  | COL24A1  | 0.21  | 0.000286765 | 1.34E-02 |
| cg04623837 | 6  | 29943414  | HCG9     | 0.21  | 0.000287948 | 1.34E-02 |
| cg27527108 | 1  | 116711075 |          | 0.23  | 0.000288415 | 1.34E-02 |
| cg26371771 | 6  | 49518360  | C6orf141 | 0.20  | 0.000289992 | 1.35E-02 |
| cg01912955 | 6  | 100906383 | SIM1     | 0.22  | 0.000290834 | 1.35E-02 |
| cg11172629 | 10 | 11047354  | CUGBP2   | 0.23  | 0.000293096 | 1.36E-02 |
| cg14909329 | 10 | 134120029 | STK32C   | -0.25 | 0.000294595 | 1.36E-02 |
| cg04374711 | 16 | 31008960  | STX1B    | 0.24  | 0.000294728 | 1.36E-02 |
| cg00337916 | 7  | 96643686  | DLX6AS   | 0.20  | 0.000296492 | 1.37E-02 |
| cg21654383 | 2  | 85641076  |          | 0.23  | 0.000296785 | 1.37E-02 |
| cg07984133 | 13 | 28544592  | CDX2     | 0.23  | 0.000297233 | 1.37E-02 |
| cg26051413 | 11 | 2292902   | ASCL2    | 0.23  | 0.000297797 | 1.37E-02 |
| cg04151062 | 1  | 116710943 |          | 0.20  | 0.000298467 | 1.37E-02 |
| cg05136263 | 2  | 45236019  | SIX2     | 0.23  | 0.000301296 | 1.38E-02 |
| cg07211768 | 12 | 115102290 |          | 0.21  | 0.000301303 | 1.38E-02 |
| cg19560588 | 7  | 25892614  |          | 0.20  | 0.000302587 | 1.38E-02 |
| cg27552679 | 15 | 74425757  | ISLR2    | 0.22  | 0.000302793 | 1.38E-02 |
| cg13546414 | 14 | 37053664  |          | 0.21  | 0.000302808 | 1.38E-02 |
| cg03972071 | 18 | 72917163  | ZADH2    | 0.25  | 0.000303001 | 1.39E-02 |
| cg14962509 | 1  | 36039655  | TFAP2E   | 0.25  | 0.000304035 | 1.39E-02 |
| cg18794404 | 10 | 22542024  |          | 0.21  | 0.000304772 | 1.39E-02 |
| cg01997272 | 14 | 103740476 |          | 0.21  | 0.000305134 | 1.39E-02 |
| cg00294684 | 11 | 5602123   | OR52B6   | -0.22 | 0.000306291 | 1.39E-02 |
| cg04373435 | 2  | 79738582  | CTNNA2   | 0.22  | 0.000307579 | 1.40E-02 |
| cg21608600 | 2  | 45228716  |          | 0.20  | 0.000309853 | 1.40E-02 |
| cg22721579 | 1  | 36787932  | FAM176B  | 0.23  | 0.00030991  | 1.40E-02 |
| cg09465698 | 5  | 140787623 | PCDHGA4  | 0.20  | 0.000312468 | 1.41E-02 |
| cg16838838 | 2  | 85641023  |          | 0.20  | 0.000312528 | 1.41E-02 |
| cg13292042 | 4  | 111535334 |          | 0.25  | 0.00031261  | 1.41E-02 |
| cg27565555 | 20 | 55839663  | BMP7     | 0.25  | 0.000313603 | 1.42E-02 |
| cg25751371 | 12 | 49659053  | TUBA1C   | 0.21  | 0.00031478  | 1.42E-02 |
| cg10074727 | 6  | 10883105  | GCM2     | 0.21  | 0.000318207 | 1.43E-02 |
| cg01947943 | 6  | 29012859  | OR2W1    | -0.21 | 0.00031875  | 1.43E-02 |
| cg09880291 | 7  | 27184109  | HOXA5    | 0.20  | 0.000320513 | 1.43E-02 |
| cg14434755 | 12 | 115107540 |          | 0.20  | 0.000320562 | 1.43E-02 |



|            |    |           |          |       |             |          |
|------------|----|-----------|----------|-------|-------------|----------|
| cg00804587 | 3  | 190038679 | CLDN1    | -0.20 | 0.000321189 | 1.44E-02 |
| cg06097659 | 1  | 1141991   | TNFRSF18 | 0.24  | 0.000323248 | 1.44E-02 |
| cg25851651 | 19 | 14939300  | OR7A5    | -0.20 | 0.000323687 | 1.44E-02 |
| cg05020759 | 8  | 16240240  |          | -0.22 | 0.000325674 | 1.45E-02 |
| cg07258300 | 2  | 127963590 | CYP27C1  | -0.21 | 0.000325861 | 1.45E-02 |
| cg18950778 | 11 | 32455362  | WT1      | 0.21  | 0.000325966 | 1.45E-02 |
| cg02194223 | 7  | 27285433  | EVX1     | 0.20  | 0.000326137 | 1.45E-02 |
| cg08832624 | 7  | 98099917  |          | 0.20  | 0.000326542 | 1.45E-02 |
| cg14996220 | 12 | 85673270  | ALX1     | 0.21  | 0.000329229 | 1.46E-02 |
| cg26109568 | 2  | 105697685 | MRPS9    | 0.20  | 0.00032991  | 1.46E-02 |
| cg24113409 | 6  | 10884314  |          | 0.20  | 0.000330321 | 1.46E-02 |
| cg13740135 | 19 | 44006432  | PHLDB3   | 0.20  | 0.000332179 | 1.46E-02 |
| cg20238681 | 15 | 94443233  |          | 0.21  | 0.000332686 | 1.47E-02 |
| cg13622450 | 9  | 91147514  |          | 0.21  | 0.000333471 | 1.47E-02 |
| cg23680821 | 1  | 109204316 | C1orf59  | 0.20  | 0.000333626 | 1.47E-02 |
| cg10947408 | 10 | 77155404  |          | 0.21  | 0.000334608 | 1.47E-02 |
| cg04352272 | 17 | 3289798   |          | 0.21  | 0.000334854 | 1.47E-02 |
| cg13910040 | 1  | 153438468 |          | 0.22  | 0.000336776 | 1.48E-02 |
| cg01833675 | 2  | 225266876 | FAM124B  | -0.21 | 0.000337881 | 1.48E-02 |
| cg25339566 | 1  | 67218165  | TCTEX1D1 | 0.25  | 0.000338051 | 1.48E-02 |
| cg09426383 | 7  | 26897182  | SKAP2    | 0.22  | 0.00034231  | 1.49E-02 |
| cg09052548 | 10 | 11047368  | CUGBP2   | 0.23  | 0.000342701 | 1.49E-02 |
| cg06747432 | 19 | 46916741  | CCDC8    | 0.24  | 0.000343406 | 1.49E-02 |
| cg21596313 | 6  | 74233269  |          | 0.22  | 0.000343516 | 1.49E-02 |
| cg06504526 | 6  | 100894629 | SIM1     | 0.23  | 0.000343614 | 1.49E-02 |
| cg22367191 | 6  | 10425648  |          | 0.23  | 0.000345433 | 1.50E-02 |
| cg11798857 | 20 | 22566289  | FOXA2    | 0.22  | 0.000345467 | 1.50E-02 |
| cg20377305 | 7  | 96650668  | DLX5     | 0.23  | 0.000346354 | 1.50E-02 |
| cg20254225 | 2  | 38301438  | CYP1B1   | 0.21  | 0.000347392 | 1.50E-02 |
| cg12433473 | 2  | 220406756 | CHPF     | 0.20  | 0.000347864 | 1.50E-02 |
| cg27404023 | 2  | 162283994 |          | 0.20  | 0.000348369 | 1.51E-02 |
| cg20998319 | 2  | 157177345 |          | 0.22  | 0.000349362 | 1.51E-02 |
| cg02373784 | 4  | 13537302  |          | 0.21  | 0.000350779 | 1.51E-02 |
| cg02780919 | 11 | 9026308   | NRIP3    | 0.22  | 0.000352552 | 1.52E-02 |
| cg26365623 | 11 | 5144101   | OR52A4   | -0.22 | 0.000359252 | 1.53E-02 |
| cg11789534 | 22 | 37655614  |          | 0.21  | 0.000361164 | 1.54E-02 |
| cg14987431 | 10 | 94455650  |          | 0.21  | 0.000362324 | 1.54E-02 |
| cg09072162 | 1  | 55505180  | PCSK9    | 0.20  | 0.000363119 | 1.55E-02 |
| cg17286640 | 4  | 55991202  | KDR      | 0.22  | 0.000366471 | 1.55E-02 |
| cg18562243 | 3  | 181414189 | SOX2OT   | 0.21  | 0.000366578 | 1.55E-02 |
| cg20386316 | 8  | 72470982  |          | 0.21  | 0.000366902 | 1.55E-02 |
| cg06374962 | 4  | 111531926 |          | 0.22  | 0.000368919 | 1.56E-02 |
| cg01871214 | 4  | 41881417  |          | 0.25  | 0.00036906  | 1.56E-02 |
| cg23234847 | 14 | 20611696  | OR4N5    | 0.20  | 0.000370233 | 1.56E-02 |
| cg26196480 | 12 | 114846347 | TBX5     | 0.23  | 0.000371956 | 1.57E-02 |
| cg23741006 | 11 | 59634191  | TCN1     | -0.21 | 0.000372604 | 1.57E-02 |
| cg07615087 | 21 | 38077347  | SIM2     | 0.21  | 0.000372769 | 1.57E-02 |
| cg06911121 | 12 | 114847164 | TBX5     | 0.24  | 0.000373034 | 1.57E-02 |
| cg14886269 | 1  | 1141927   | TNFRSF18 | 0.22  | 0.00037355  | 1.57E-02 |
| cg23586322 | 8  | 121138232 | COL14A1  | 0.22  | 0.000374511 | 1.58E-02 |
| cg16898193 | 12 | 54377550  | HOXC10   | 0.23  | 0.000377984 | 1.58E-02 |
| cg22387369 | 15 | 85360691  | ALPK3    | 0.20  | 0.000379062 | 1.59E-02 |
| cg01869219 | 2  | 224702789 | AP1S3    | 0.21  | 0.0003849   | 1.60E-02 |
| cg12126857 | 1  | 35384669  |          | 0.21  | 0.000388412 | 1.61E-02 |
| cg13443627 | 1  | 59043070  | TACSTD2  | 0.22  | 0.000390305 | 1.62E-02 |
| cg17481703 | 13 | 76444831  |          | -0.21 | 0.00039141  | 1.62E-02 |
| cg10933003 | 4  | 174448341 | HAND2    | 0.22  | 0.000392886 | 1.62E-02 |
| cg13406860 | 9  | 132881336 | GPR107   | 0.20  | 0.000393881 | 1.63E-02 |
| cg08971667 | 7  | 27201728  |          | -0.21 | 0.000395601 | 1.63E-02 |
| cg17284804 | 1  | 67218135  | TCTEX1D1 | 0.22  | 0.000395817 | 1.63E-02 |
| cg00748875 | 5  | 140175116 | PCDHA1   | 0.20  | 0.000396491 | 1.63E-02 |
| cg26325335 | 3  | 50402333  | CACNA2D2 | 0.20  | 0.000398847 | 1.64E-02 |
| cg21429725 | 3  | 196693809 | PIGZ     | 0.25  | 0.000400288 | 1.64E-02 |
| cg01518889 | 3  | 128202493 | GATA2    | 0.20  | 0.00040131  | 1.65E-02 |
| cg02455820 | 16 | 51147769  |          | 0.24  | 0.000402883 | 1.65E-02 |
| cg12040278 | 2  | 37572396  | QPCT     | 0.22  | 0.000403353 | 1.65E-02 |

|            |    |           |          |       |             |          |
|------------|----|-----------|----------|-------|-------------|----------|
| cg09496464 | 2  | 208904568 |          | -0.20 | 0.000404542 | 1.65E-02 |
| cg04922681 | 13 | 43149234  | TNFSF11  | 0.22  | 0.000404703 | 1.66E-02 |
| cg10272601 | 9  | 95947146  | WNK2     | 0.24  | 0.000404744 | 1.66E-02 |
| cg12738347 | 15 | 53096854  |          | 0.21  | 0.000410619 | 1.67E-02 |
| cg19525418 | 8  | 61765432  | CHD7     | -0.23 | 0.00041082  | 1.67E-02 |
| cg06691343 | 8  | 53326305  |          | -0.20 | 0.000412355 | 1.67E-02 |
| cg17355294 | 19 | 51416098  |          | 0.21  | 0.000417418 | 1.69E-02 |
| cg16201038 | 13 | 28544760  | CDX2     | 0.23  | 0.000421765 | 1.70E-02 |
| cg06282446 | 5  | 140174554 | PCDHA1   | 0.23  | 0.000422287 | 1.70E-02 |
| cg08915171 | 2  | 105273376 |          | -0.21 | 0.000423636 | 1.70E-02 |
| cg19693890 | 6  | 168377714 | HGC6.3   | -0.22 | 0.000426968 | 1.71E-02 |
| cg02272795 | 19 | 15279244  | NOTCH3   | -0.23 | 0.000430169 | 1.72E-02 |
| cg10425861 | 15 | 60286540  |          | 0.20  | 0.000430515 | 1.72E-02 |
| cg25200152 | 1  | 147790458 |          | 0.21  | 0.000433241 | 1.73E-02 |
| cg03728046 | 7  | 6566428   | GRID2IP  | 0.21  | 0.000435706 | 1.74E-02 |
| cg23063647 | 4  | 206339    | ZNF876P  | 0.20  | 0.000437413 | 1.74E-02 |
| cg25412017 | 5  | 175560449 |          | 0.21  | 0.000437441 | 1.74E-02 |
| cg03585912 | 6  | 10385776  |          | 0.22  | 0.000437585 | 1.74E-02 |
| cg21854286 | 17 | 40700858  |          | 0.21  | 0.000437821 | 1.74E-02 |
| cg02369542 | 1  | 41119940  | RIMS3    | 0.21  | 0.000439496 | 1.74E-02 |
| cg26947626 | 8  | 72469430  |          | 0.23  | 0.000439661 | 1.74E-02 |
| cg15400671 | 7  | 34004484  | BMPER    | -0.21 | 0.000442766 | 1.75E-02 |
| cg02348751 | 4  | 183064035 | MGC45800 | 0.22  | 0.000443342 | 1.75E-02 |
| cg23588462 | 13 | 95357223  |          | 0.21  | 0.000445371 | 1.76E-02 |
| cg09415754 | 6  | 10385392  |          | 0.22  | 0.000445907 | 1.76E-02 |
| cg05844937 | 6  | 1614141   |          | 0.24  | 0.000449221 | 1.77E-02 |
| cg24873592 | 1  | 32042092  | TINAGL1  | 0.22  | 0.000449549 | 1.77E-02 |
| cg13836098 | 6  | 26225268  | HIST1H3E | 0.25  | 0.000449612 | 1.77E-02 |
| cg24177393 | 5  | 43037517  |          | 0.22  | 0.000450205 | 1.77E-02 |
| cg07915921 | 12 | 54321502  |          | 0.23  | 0.000450501 | 1.77E-02 |
| cg20615879 | 10 | 102892391 | TLX1NB   | 0.21  | 0.000450795 | 1.77E-02 |
| cg05661282 | 19 | 58220370  | ZNF154   | 0.22  | 0.000454806 | 1.78E-02 |
| cg20274304 | 8  | 28176295  | PNOC     | -0.22 | 0.000459374 | 1.79E-02 |
| cg12062156 | 10 | 2487194   |          | -0.20 | 0.000460421 | 1.79E-02 |
| cg04227922 | 2  | 119615496 |          | 0.24  | 0.000463272 | 1.80E-02 |
| cg20616414 | 9  | 95947396  | WNK2     | 0.21  | 0.000468651 | 1.81E-02 |
| cg08540622 | 11 | 59806898  | PLAC1L   | -0.20 | 0.000472934 | 1.82E-02 |
| cg06792065 | 13 | 20711179  |          | 0.20  | 0.000474381 | 1.83E-02 |
| cg20806345 | 2  | 182543706 | NEUROD1  | 0.24  | 0.000482391 | 1.85E-02 |
| cg19905856 | 10 | 118924620 |          | 0.22  | 0.000484157 | 1.85E-02 |
| cg08505647 | 11 | 59807594  | PLAC1L   | -0.22 | 0.000488135 | 1.86E-02 |
| cg27178293 | 12 | 54371246  |          | 0.21  | 0.00049376  | 1.87E-02 |
| cg24446586 | 7  | 27225078  | HOXA11AS | 0.21  | 0.000495858 | 1.88E-02 |
| cg02478379 | 5  | 170814123 | NPM1     | 0.20  | 0.000496121 | 1.88E-02 |
| cg12259469 | 7  | 39017305  | POU6F2   | -0.22 | 0.000496726 | 1.88E-02 |
| cg15470836 | 13 | 100648306 |          | 0.21  | 0.000498034 | 1.88E-02 |
| cg02767242 | 2  | 162274424 | TBR1     | 0.21  | 0.00049857  | 1.89E-02 |
| cg23971170 | 1  | 165326269 | LMX1A    | 0.20  | 0.000504007 | 1.90E-02 |
| cg17080163 | 2  | 123418757 |          | 0.21  | 0.000505248 | 1.90E-02 |
| cg09861917 | 20 | 22566877  | FOXA2    | 0.22  | 0.000505562 | 1.90E-02 |
| cg17976229 | 11 | 5653336   | TRIM34   | -0.23 | 0.000507038 | 1.91E-02 |
| cg19370653 | 4  | 111550040 | PITX2    | 0.23  | 0.000512154 | 1.92E-02 |
| cg22160073 | 11 | 5653405   | TRIM34   | -0.22 | 0.000512815 | 1.92E-02 |
| cg25480336 | 20 | 50720908  | ZFP64    | 0.23  | 0.000514159 | 1.92E-02 |
| cg18653451 | 19 | 46917018  | CCDC8    | 0.21  | 0.000516945 | 1.93E-02 |
| cg09938227 | 1  | 156390124 | C1orf61  | 0.20  | 0.000520213 | 1.94E-02 |
| cg24335456 | 8  | 58106155  |          | -0.22 | 0.000523829 | 1.95E-02 |
| cg18417953 | 18 | 55097461  |          | 0.21  | 0.000525368 | 1.95E-02 |
| cg22876812 | 2  | 71116188  |          | 0.22  | 0.000526731 | 1.96E-02 |
| cg23352271 | 11 | 49915274  |          | -0.21 | 0.000530356 | 1.97E-02 |
| cg14270434 | 9  | 100613647 |          | 0.20  | 0.000534241 | 1.98E-02 |
| cg08808042 | 16 | 88053104  | BANP     | 0.21  | 0.000537978 | 1.98E-02 |
| cg01838004 | 9  | 100070007 | KIAA1529 | 0.21  | 0.000539095 | 1.99E-02 |
| cg14409810 | 9  | 140172908 | C9orf167 | 0.21  | 0.000541703 | 1.99E-02 |
| cg15553770 | 11 | 5531524   | UBQLN3   | -0.22 | 0.000550498 | 2.01E-02 |
| cg08667128 | 17 | 29886885  | MIR193A  | 0.25  | 0.000551663 | 2.02E-02 |

|            |    |           |          |       |             |          |
|------------|----|-----------|----------|-------|-------------|----------|
| cg19250101 | 19 | 54666215  | TMC4     | 0.20  | 0.000555461 | 2.03E-02 |
| cg09495769 | 7  | 27225342  | HOXA11AS | 0.20  | 0.000556886 | 2.03E-02 |
| cg24376337 | 11 | 56430801  | OR5AR1   | -0.22 | 0.000557865 | 2.03E-02 |
| cg02764478 | 6  | 100904316 | SIM1     | 0.21  | 0.000559267 | 2.03E-02 |
| cg21775675 | 5  | 87441487  |          | 0.20  | 0.000559866 | 2.04E-02 |
| cg02513017 | 16 | 68544286  |          | 0.21  | 0.000561675 | 2.04E-02 |
| cg06994420 | 2  | 66672553  | MEIS1    | 0.20  | 0.000563572 | 2.04E-02 |
| cg19513071 | 5  | 87441918  |          | 0.21  | 0.000565864 | 2.05E-02 |
| cg24267283 | 3  | 181414021 | SOX2OT   | 0.20  | 0.000572487 | 2.06E-02 |
| cg11469908 | 2  | 66918305  |          | 0.21  | 0.000580915 | 2.09E-02 |
| cg05857996 | 20 | 2675418   | EBF4     | 0.23  | 0.000581271 | 2.09E-02 |
| cg01544903 | 16 | 56697229  |          | 0.24  | 0.000583348 | 2.09E-02 |
| cg05325193 | 20 | 22558233  | C20orf56 | 0.23  | 0.000588692 | 2.10E-02 |
| cg12548057 | 7  | 73389660  |          | -0.20 | 0.000591446 | 2.11E-02 |
| cg18913890 | 2  | 79738619  | CTNNA2   | 0.21  | 0.000597845 | 2.12E-02 |
| cg11053632 | 16 | 88053094  | BANP     | 0.20  | 0.000598019 | 2.12E-02 |
| cg04685570 | 12 | 114841202 | TBX5     | 0.21  | 0.000598612 | 2.12E-02 |
| cg16591182 | 8  | 77602161  | ZFHX4    | -0.22 | 0.000602433 | 2.13E-02 |
| cg26081162 | 6  | 49518449  | C6orf141 | 0.21  | 0.000605261 | 2.14E-02 |
| cg21377260 | 7  | 1856979   | MAD1L1   | -0.21 | 0.000614444 | 2.16E-02 |
| cg09502015 | 5  | 87441873  |          | 0.21  | 0.000614753 | 2.16E-02 |
| cg14632030 | 11 | 60144545  | MS4A7    | -0.22 | 0.000616944 | 2.17E-02 |
| cg00880018 | 13 | 43149171  | TNFSF11  | 0.21  | 0.000620883 | 2.18E-02 |
| cg15310637 | 12 | 14927542  | H2AFJ    | 0.23  | 0.000621162 | 2.18E-02 |
| cg05835982 | 3  | 129693791 | TRH      | 0.22  | 0.00062462  | 2.18E-02 |
| cg01872719 | 14 | 106744392 |          | -0.20 | 0.000627026 | 2.19E-02 |
| cg11930908 | 13 | 23500752  |          | 0.23  | 0.000631305 | 2.20E-02 |
| cg24722073 | 4  | 41882163  |          | 0.21  | 0.000633062 | 2.20E-02 |
| cg15160263 | 5  | 76923943  |          | 0.20  | 0.000637738 | 2.21E-02 |
| cg06091881 | 21 | 48087589  |          | 0.21  | 0.000638974 | 2.22E-02 |
| cg26224671 | 13 | 43148935  | TNFSF11  | 0.23  | 0.000640322 | 2.22E-02 |
| cg00469602 | 2  | 172955930 |          | 0.20  | 0.00065278  | 2.25E-02 |
| cg17929238 | 4  | 111545628 | PITX2    | 0.21  | 0.00065598  | 2.25E-02 |
| cg14862207 | 17 | 36715798  | SRCIN1   | 0.23  | 0.000658356 | 2.26E-02 |
| cg04249522 | 6  | 166218512 |          | 0.21  | 0.000658972 | 2.26E-02 |
| cg07991112 | 6  | 27841423  | HIST1H4L | 0.24  | 0.000671137 | 2.28E-02 |
| cg18960642 | 6  | 39281694  | KCNK17   | 0.23  | 0.000677724 | 2.30E-02 |
| cg21453451 | 3  | 181414237 | SOX2OT   | 0.20  | 0.000690563 | 2.33E-02 |
| cg14871932 | 7  | 44185323  | GCK      | 0.20  | 0.000693651 | 2.34E-02 |
| cg01064265 | 16 | 55363058  | IRX6     | 0.21  | 0.000693889 | 2.34E-02 |
| cg11841394 | 12 | 114841536 | TBX5     | 0.23  | 0.000704215 | 2.36E-02 |
| cg21033440 | 11 | 65409861  | SIPA1    | 0.22  | 0.000710993 | 2.37E-02 |
| cg24354581 | 21 | 38079615  | SIM2     | 0.21  | 0.000711453 | 2.37E-02 |
| cg24362812 | 18 | 11148769  | FAM38B   | 0.21  | 0.000729708 | 2.41E-02 |
| cg00181125 | 12 | 22095182  |          | 0.20  | 0.000733592 | 2.42E-02 |
| cg06276084 | 6  | 168377594 | HGC6.3   | -0.20 | 0.000745591 | 2.45E-02 |
| cg11836236 | 10 | 118893224 | VAX1     | 0.22  | 0.00075431  | 2.46E-02 |
| cg04178787 | 2  | 123418787 |          | 0.21  | 0.00075533  | 2.47E-02 |
| cg10464312 | 2  | 66672688  | MEIS1    | 0.20  | 0.000758392 | 2.47E-02 |
| cg24452128 | 6  | 10390919  |          | 0.24  | 0.000763557 | 2.48E-02 |
| cg01340542 | 1  | 65468273  |          | 0.21  | 0.000773799 | 2.51E-02 |
| cg08394412 | 16 | 50875140  |          | 0.20  | 0.000780261 | 2.52E-02 |
| cg03610852 | 8  | 65287050  |          | 0.21  | 0.000781829 | 2.52E-02 |
| cg22790931 | 7  | 39017455  | POU6F2   | -0.20 | 0.000790493 | 2.54E-02 |
| cg11614451 | 3  | 160167729 | TRIM59   | 0.20  | 0.000791695 | 2.54E-02 |
| cg09339818 | 6  | 100914480 |          | 0.23  | 0.000798497 | 2.55E-02 |
| cg10263682 | 3  | 181413847 | SOX2OT   | 0.21  | 0.000798699 | 2.55E-02 |
| cg05106770 | 4  | 128545193 |          | 0.24  | 0.000813438 | 2.58E-02 |
| cg11988964 | 10 | 54073189  | DKK1     | 0.22  | 0.000851698 | 2.66E-02 |
| cg00890363 | 4  | 13540673  |          | 0.22  | 0.000858972 | 2.67E-02 |
| cg04619381 | 7  | 29603121  | PRR15    | 0.21  | 0.000860307 | 2.68E-02 |
| cg05555207 | 12 | 114847641 | TBX5     | 0.22  | 0.000863537 | 2.68E-02 |
| cg00231504 | 6  | 100906448 | SIM1     | 0.20  | 0.000872456 | 2.70E-02 |
| cg15781504 | 11 | 4871411   | OR51S1   | -0.20 | 0.000874133 | 2.70E-02 |
| cg09427998 | 4  | 13530470  |          | 0.21  | 0.000874869 | 2.70E-02 |
| cg17627629 | 5  | 179517140 |          | 0.21  | 0.000875909 | 2.71E-02 |

|            |    |           |           |       |             |          |
|------------|----|-----------|-----------|-------|-------------|----------|
| cg21200539 | 4  | 147562073 | POU4F2    | 0.20  | 0.000882682 | 2.72E-02 |
| cg22989843 | 2  | 223154201 | PAX3      | 0.21  | 0.000899423 | 2.75E-02 |
| cg27539060 | 6  | 137112464 | MAP3K5    | 0.20  | 0.000901638 | 2.75E-02 |
| cg13672078 | 5  | 87439429  |           | 0.23  | 0.000911608 | 2.77E-02 |
| cg08460435 | 1  | 109203610 | C1orf59   | 0.20  | 0.000922456 | 2.79E-02 |
| cg11685316 | 17 | 8702564   | MFSD6L    | 0.21  | 0.000923807 | 2.79E-02 |
| cg04751149 | 2  | 66673449  | MEIS1     | 0.21  | 0.000928177 | 2.80E-02 |
| cg05385513 | 2  | 56150478  | EFEMP1    | 0.21  | 0.000929071 | 2.80E-02 |
| cg05789359 | 6  | 168377723 | HGC6.3    | -0.20 | 0.000934386 | 2.81E-02 |
| cg01680010 | 7  | 96647117  |           | 0.23  | 0.000965313 | 2.87E-02 |
| cg06482019 | 16 | 51147902  |           | 0.22  | 0.000974907 | 2.89E-02 |
| cg16357224 | 16 | 86530053  |           | 0.20  | 0.000986055 | 2.91E-02 |
| cg04822330 | 6  | 126069172 |           | 0.22  | 0.000986515 | 2.91E-02 |
| cg12065840 | 8  | 121138133 | COL14A1   | 0.21  | 0.00099243  | 2.92E-02 |
| cg26728390 | 8  | 145777781 | KIAA1688  | -0.21 | 0.000996206 | 2.92E-02 |
| cg05905176 | 15 | 51385916  | TNFAIP8L3 | 0.22  | 0.0010036   | 2.94E-02 |
| cg21545862 | 5  | 174159294 |           | 0.21  | 0.001014592 | 2.95E-02 |
| cg18205770 | 5  | 87439353  |           | 0.23  | 0.001015333 | 2.96E-02 |
| cg01176947 | 6  | 10385279  |           | 0.21  | 0.001024712 | 2.97E-02 |
| cg02909688 | 1  | 147752823 |           | 0.20  | 0.001034855 | 2.99E-02 |
| cg17078427 | 3  | 170137552 | CLDN11    | 0.20  | 0.001036179 | 2.99E-02 |
| cg02966475 | 16 | 65105516  | CDH11     | -0.20 | 0.001053461 | 3.03E-02 |
| cg25887236 | 18 | 74844781  | MBP       | 0.21  | 0.001054566 | 3.03E-02 |
| cg07915434 | 10 | 102894342 | TLX1      | 0.20  | 0.001059379 | 3.03E-02 |
| cg13082654 | 21 | 47811350  | PCNT      | 0.21  | 0.001064942 | 3.04E-02 |
| cg22964918 | 7  | 27286075  | EVX1      | 0.21  | 0.00106652  | 3.05E-02 |
| cg04688351 | 2  | 223154140 | PAX3      | 0.22  | 0.001076922 | 3.06E-02 |
| cg05353869 | 11 | 75139544  | KLHL35    | 0.21  | 0.00109651  | 3.10E-02 |
| cg00486340 | 4  | 4860026   | MSX1      | 0.20  | 0.001107008 | 3.12E-02 |
| cg00110654 | 6  | 10385489  |           | 0.21  | 0.001123288 | 3.15E-02 |
| cg27300028 | 13 | 100312810 | CLYBL     | 0.21  | 0.001137087 | 3.17E-02 |
| cg11738701 | 8  | 97167470  | GDF6      | 0.21  | 0.001138096 | 3.17E-02 |
| cg05065507 | 1  | 59042931  | TACSTD2   | 0.20  | 0.001140367 | 3.17E-02 |
| cg08900101 | 12 | 114833043 | TBX5      | 0.20  | 0.001191076 | 3.26E-02 |
| cg02551743 | 2  | 66673428  | MEIS1     | 0.20  | 0.001251433 | 3.36E-02 |
| cg21485303 | 12 | 22094699  |           | 0.23  | 0.001264398 | 3.38E-02 |
| cg16423505 | 13 | 92051400  | GPC5      | 0.22  | 0.001281047 | 3.41E-02 |
| cg26695758 | 6  | 32063607  | TNXB      | 0.20  | 0.001284365 | 3.41E-02 |
| cg10705379 | 10 | 99080932  | FRAT1     | 0.21  | 0.001289503 | 3.42E-02 |
| cg08530237 | 12 | 22094563  |           | 0.23  | 0.001293399 | 3.42E-02 |
| cg26626663 | 8  | 121137879 | COL14A1   | 0.20  | 0.001293809 | 3.42E-02 |
| cg04586407 | 16 | 31008574  | STX1B     | 0.20  | 0.001295759 | 3.43E-02 |
| cg21811204 | 5  | 132158625 | SHROOM1   | 0.21  | 0.001326297 | 3.48E-02 |
| cg24336989 | 6  | 10385903  |           | 0.22  | 0.00133277  | 3.49E-02 |
| cg13300273 | 1  | 200842890 | GPR25     | 0.23  | 0.00133458  | 3.49E-02 |
| cg07312880 | 2  | 172430789 |           | 0.21  | 0.001347327 | 3.51E-02 |
| cg14491820 | 10 | 102986808 | LBX1      | 0.23  | 0.00140364  | 3.59E-02 |
| cg09488203 | 10 | 95327884  | GPR120    | 0.22  | 0.001424892 | 3.63E-02 |
| cg26714388 | 12 | 34488729  |           | -0.21 | 0.001435175 | 3.64E-02 |
| cg06279276 | 16 | 67184164  | B3GNT9    | 0.20  | 0.001437429 | 3.65E-02 |
| cg19463256 | 19 | 46915351  | CCDC8     | 0.21  | 0.001458565 | 3.68E-02 |
| cg27555582 | 12 | 22094009  |           | 0.24  | 0.001466761 | 3.69E-02 |
| cg04194674 | 17 | 36715953  | SRCIN1    | 0.22  | 0.001467163 | 3.69E-02 |
| cg08380311 | 19 | 3435252   | NFIC      | 0.22  | 0.001467702 | 3.69E-02 |
| cg14578879 | 6  | 100904055 | SIM1      | 0.21  | 0.001503095 | 3.74E-02 |
| cg09849405 | 16 | 66612955  | CMTM1     | 0.21  | 0.001521037 | 3.77E-02 |
| cg12288941 | 15 | 37175117  | LOC145845 | 0.20  | 0.001521045 | 3.77E-02 |
| cg12997720 | 7  | 27225058  | HOXA11AS  | 0.21  | 0.001527498 | 3.78E-02 |
| cg25461801 | 13 | 100630316 |           | 0.25  | 0.001551549 | 3.81E-02 |
| cg02094500 | 6  | 62737607  | KHDRBS2   | -0.21 | 0.001572361 | 3.84E-02 |
| cg06369992 | 10 | 119494494 |           | 0.20  | 0.001591919 | 3.87E-02 |
| cg14269191 | 11 | 5346249   | OR51B2    | -0.20 | 0.001667418 | 3.97E-02 |
| cg05990544 | 6  | 27841314  | HIST1H4L  | 0.24  | 0.001680268 | 3.99E-02 |
| cg25485294 | 6  | 27841324  | HIST1H4L  | 0.22  | 0.001681737 | 4.00E-02 |
| cg17242937 | 4  | 111561114 |           | 0.22  | 0.00168879  | 4.01E-02 |
| cg25845597 | 6  | 27841122  | HIST1H4L  | 0.21  | 0.001755544 | 4.11E-02 |

|            |    |           |           |       |             |          |
|------------|----|-----------|-----------|-------|-------------|----------|
| cg01085837 | 12 | 22094461  |           | 0.22  | 0.001765064 | 4.12E-02 |
| cg11901043 | 12 | 22093960  |           | 0.21  | 0.001810438 | 4.19E-02 |
| cg17611686 | 20 | 22547532  | C20orf56  | 0.20  | 0.001851945 | 4.25E-02 |
| cg03393426 | 10 | 102986686 |           | 0.20  | 0.001854457 | 4.25E-02 |
| cg09550083 | 2  | 66672337  | MEIS1     | 0.22  | 0.001867641 | 4.27E-02 |
| cg01171339 | 6  | 27831894  | HIST1H2AL | 0.20  | 0.001870635 | 4.28E-02 |
| cg21507095 | 22 | 19754448  | TBX1      | 0.20  | 0.001940654 | 4.37E-02 |
| cg06323023 | 6  | 27841352  | HIST1H4L  | 0.21  | 0.001994247 | 4.45E-02 |
| cg00804179 | 3  | 13083974  | IQSEC1    | -0.20 | 0.002339062 | 4.90E-02 |
| cg25524962 | 13 | 20735819  | GJA3      | 0.20  | 0.002406883 | 4.99E-02 |

**Table S6.** GO Biological processes enriched in DMPs in TYA of SHH tumours DMPs with High Methylation in TYA

| Term_ID    | Term_Name                                                               | Term_Size | Intersection_Size | FDR      |
|------------|-------------------------------------------------------------------------|-----------|-------------------|----------|
| GO:0009790 | embryo development                                                      | 1035      | 107               | 2.17E-26 |
| GO:0048856 | anatomical structure development                                        | 6106      | 310               | 1.39E-24 |
| GO:0048598 | embryonic morphogenesis                                                 | 595       | 77                | 3.46E-24 |
| GO:0032502 | developmental process                                                   | 6628      | 325               | 1.05E-23 |
| GO:0007275 | multicellular organism development                                      | 5613      | 289               | 8.55E-23 |
| GO:0048731 | system development                                                      | 5052      | 266               | 2.23E-21 |
| GO:0048568 | embryonic organ development                                             | 432       | 62                | 2.47E-21 |
| GO:0006357 | regulation of transcription by RNA polymerase II                        | 2555      | 170               | 3.25E-21 |
| GO:0007389 | pattern specification process                                           | 442       | 62                | 8.65E-21 |
| GO:0007399 | nervous system development                                              | 2449      | 164               | 1.56E-20 |
| GO:0009653 | anatomical structure morphogenesis                                      | 2797      | 177               | 7.46E-20 |
| GO:0006366 | transcription by RNA polymerase II                                      | 2723      | 172               | 5.19E-19 |
| GO:0045944 | positive regulation of transcription by RNA polymerase II               | 1197      | 103               | 6.33E-19 |
| GO:0009887 | animal organ morphogenesis                                              | 1073      | 96                | 1.36E-18 |
| GO:0048562 | embryonic organ morphogenesis                                           | 292       | 48                | 1.68E-18 |
| GO:0030182 | neuron differentiation                                                  | 1412      | 111               | 1.47E-17 |
| GO:0051254 | positive regulation of RNA metabolic process                            | 1714      | 125               | 1.73E-17 |
| GO:0003002 | regionalization                                                         | 338       | 50                | 2.69E-17 |
| GO:0048513 | animal organ development                                                | 3672      | 205               | 2.97E-17 |
| GO:0045165 | cell fate commitment                                                    | 267       | 44                | 8.25E-17 |
| GO:0045893 | positive regulation of transcription, DNA-templated                     | 1617      | 118               | 2.73E-16 |
| GO:1903508 | positive regulation of nucleic acid-templated transcription             | 1617      | 118               | 2.73E-16 |
| GO:1902680 | positive regulation of RNA biosynthetic process                         | 1618      | 118               | 2.87E-16 |
| GO:0048699 | generation of neurons                                                   | 1559      | 115               | 3.89E-16 |
| GO:0048869 | cellular developmental process                                          | 4428      | 228               | 1.77E-15 |
| GO:0030154 | cell differentiation                                                    | 4350      | 225               | 2.08E-15 |
| GO:0032501 | multicellular organismal process                                        | 7946      | 344               | 2.22E-15 |
| GO:0022008 | neurogenesis                                                            | 1675      | 118               | 4.42E-15 |
| GO:0006355 | regulation of transcription, DNA-templated                              | 3534      | 193               | 9.90E-15 |
| GO:1903506 | regulation of nucleic acid-templated transcription                      | 3535      | 193               | 1.02E-14 |
| GO:0009952 | anterior/posterior pattern specification                                | 211       | 37                | 1.04E-14 |
| GO:2001141 | regulation of RNA biosynthetic process                                  | 3540      | 193               | 1.20E-14 |
| GO:0045935 | positive regulation of nucleobase-containing compound metabolic process | 1887      | 126               | 1.79E-14 |
| GO:0051252 | regulation of RNA metabolic process                                     | 3822      | 203               | 1.86E-14 |
| GO:0010556 | regulation of macromolecule biosynthetic process                        | 4102      | 213               | 2.34E-14 |
| GO:0010557 | positive regulation of macromolecule biosynthetic process               | 1851      | 124               | 2.73E-14 |
| GO:0009888 | tissue development                                                      | 2107      | 135               | 2.76E-14 |
| GO:2000112 | regulation of cellular macromolecule biosynthetic process               | 4071      | 210               | 1.03E-13 |
| GO:0048706 | embryonic skeletal system development                                   | 123       | 28                | 1.06E-13 |
| GO:0031326 | regulation of cellular biosynthetic process                             | 4273      | 217               | 1.30E-13 |

|            |                                                                    |      |     |          |
|------------|--------------------------------------------------------------------|------|-----|----------|
| GO:0006351 | transcription, DNA-templated                                       | 3714 | 196 | 2.06E-13 |
| GO:0097659 | nucleic acid-templated transcription                               | 3715 | 196 | 2.12E-13 |
| GO:0009889 | regulation of biosynthetic process                                 | 4361 | 219 | 3.16E-13 |
| GO:0009891 | positive regulation of biosynthetic process                        | 2004 | 128 | 3.26E-13 |
| GO:0032774 | RNA biosynthetic process                                           | 3731 | 196 | 3.39E-13 |
| GO:0031328 | positive regulation of cellular biosynthetic process               | 1967 | 126 | 4.85E-13 |
| GO:0048736 | appendage development                                              | 176  | 32  | 6.57E-13 |
| GO:0060173 | limb development                                                   | 176  | 32  | 6.57E-13 |
| GO:0019219 | regulation of nucleobase-containing compound metabolic process     | 4091 | 207 | 1.80E-12 |
| GO:0009792 | embryo development ending in birth or egg hatching                 | 635  | 61  | 3.60E-12 |
| GO:0030326 | embryonic limb morphogenesis                                       | 119  | 26  | 4.11E-12 |
| GO:0035113 | embryonic appendage morphogenesis                                  | 119  | 26  | 4.11E-12 |
| GO:0043009 | chordate embryonic development                                     | 616  | 59  | 1.24E-11 |
| GO:0000122 | negative regulation of transcription by RNA polymerase II          | 901  | 74  | 1.27E-11 |
| GO:0048704 | embryonic skeletal system morphogenesis                            | 94   | 23  | 1.27E-11 |
| GO:0001708 | cell fate specification                                            | 94   | 23  | 1.27E-11 |
| GO:0035107 | appendage morphogenesis                                            | 141  | 27  | 3.78E-11 |
| GO:0035108 | limb morphogenesis                                                 | 141  | 27  | 3.78E-11 |
| GO:0035270 | endocrine system development                                       | 130  | 26  | 3.92E-11 |
| GO:0001501 | skeletal system development                                        | 504  | 51  | 1.14E-10 |
| GO:0034654 | nucleobase-containing compound biosynthetic process                | 4199 | 205 | 1.29E-10 |
| GO:0048646 | anatomical structure formation involved in morphogenesis           | 1202 | 86  | 1.85E-10 |
| GO:0048468 | cell development                                                   | 2100 | 124 | 3.84E-10 |
| GO:0018130 | heterocycle biosynthetic process                                   | 4269 | 205 | 7.21E-10 |
| GO:0035295 | tube development                                                   | 1146 | 82  | 7.66E-10 |
| GO:0019438 | aromatic compound biosynthetic process                             | 4278 | 205 | 8.95E-10 |
| GO:0007417 | central nervous system development                                 | 1032 | 76  | 1.51E-09 |
| GO:0031327 | negative regulation of cellular biosynthetic process               | 1707 | 106 | 1.58E-09 |
| GO:0060485 | mesenchyme development                                             | 291  | 36  | 2.02E-09 |
| GO:2000113 | negative regulation of cellular macromolecule biosynthetic process | 1628 | 102 | 2.77E-09 |
| GO:0045892 | negative regulation of transcription, DNA-templated                | 1337 | 89  | 3.80E-09 |
| GO:1903507 | negative regulation of nucleic acid-templated transcription        | 1339 | 89  | 4.13E-09 |
| GO:0010558 | negative regulation of macromolecule biosynthetic process          | 1639 | 102 | 4.17E-09 |
| GO:0009893 | positive regulation of metabolic process                           | 3783 | 185 | 4.31E-09 |
| GO:1902679 | negative regulation of RNA biosynthetic process                    | 1341 | 89  | 4.49E-09 |
| GO:0048522 | positive regulation of cellular process                            | 5757 | 253 | 4.82E-09 |
| GO:0009890 | negative regulation of biosynthetic process                        | 1740 | 106 | 5.23E-09 |
| GO:0048705 | skeletal system morphogenesis                                      | 226  | 31  | 5.24E-09 |
| GO:1901362 | organic cyclic compound biosynthetic process                       | 4439 | 208 | 5.25E-09 |
| GO:0007267 | cell-cell signaling                                                | 1722 | 105 | 6.44E-09 |
| GO:0050793 | regulation of developmental process                                | 2605 | 140 | 9.28E-09 |
| GO:0051173 | positive regulation of nitrogen compound metabolic process         | 3083 | 158 | 1.05E-08 |
| GO:0031325 | positive regulation of cellular metabolic process                  | 3274 | 165 | 1.13E-08 |
| GO:0048729 | tissue morphogenesis                                               | 667  | 56  | 1.44E-08 |
| GO:0060429 | epithelium development                                             | 1325 | 87  | 1.48E-08 |
| GO:0045595 | regulation of cell differentiation                                 | 1679 | 102 | 1.77E-08 |
| GO:0051253 | negative regulation of RNA metabolic process                       | 1445 | 92  | 1.83E-08 |
| GO:0051239 | regulation of multicellular organismal process                     | 2861 | 148 | 3.36E-08 |
| GO:0035239 | tube morphogenesis                                                 | 950  | 69  | 3.70E-08 |
| GO:0009059 | macromolecule biosynthetic process                                 | 5114 | 228 | 3.99E-08 |
| GO:0048666 | neuron development                                                 | 1149 | 78  | 4.32E-08 |
| GO:0072359 | circulatory system development                                     | 1194 | 80  | 4.40E-08 |

|            |                                                                         |       |     |          |
|------------|-------------------------------------------------------------------------|-------|-----|----------|
| GO:0010468 | regulation of gene expression                                           | 5196  | 230 | 6.38E-08 |
| GO:0048518 | positive regulation of biological process                               | 6363  | 268 | 8.97E-08 |
| GO:0007423 | sensory organ development                                               | 567   | 49  | 1.18E-07 |
| GO:0034645 | cellular macromolecule biosynthetic process                             | 5051  | 224 | 1.23E-07 |
| GO:0010604 | positive regulation of macromolecule metabolic process                  | 3483  | 169 | 1.31E-07 |
| GO:0045934 | negative regulation of nucleobase-containing compound metabolic process | 1548  | 94  | 1.43E-07 |
| GO:0050794 | regulation of cellular process                                          | 11473 | 420 | 1.68E-07 |
| GO:0060322 | head development                                                        | 798   | 60  | 2.26E-07 |
| GO:0045596 | negative regulation of cell differentiation                             | 697   | 55  | 2.41E-07 |
| GO:0045664 | regulation of neuron differentiation                                    | 202   | 27  | 2.54E-07 |
| GO:0021953 | central nervous system neuron differentiation                           | 188   | 26  | 2.62E-07 |
| GO:0060021 | roof of mouth development                                               | 88    | 18  | 2.91E-07 |
| GO:0048762 | mesenchymal cell differentiation                                        | 234   | 29  | 3.30E-07 |
| GO:0051093 | negative regulation of developmental process                            | 977   | 68  | 3.41E-07 |
| GO:0051171 | regulation of nitrogen compound metabolic process                       | 5848  | 248 | 5.53E-07 |
| GO:0007420 | brain development                                                       | 754   | 57  | 5.61E-07 |
| GO:0044271 | cellular nitrogen compound biosynthetic process                         | 5017  | 220 | 6.51E-07 |
| GO:0000902 | cell morphogenesis                                                      | 1037  | 70  | 6.80E-07 |
| GO:0007507 | heart development                                                       | 578   | 48  | 7.31E-07 |
| GO:0002009 | morphogenesis of an epithelium                                          | 560   | 47  | 7.94E-07 |
| GO:0016070 | RNA metabolic process                                                   | 4710  | 209 | 8.97E-07 |
| GO:0060562 | epithelial tube morphogenesis                                           | 329   | 34  | 1.23E-06 |
| GO:0048732 | gland development                                                       | 436   | 40  | 1.32E-06 |
| GO:0097485 | neuron projection guidance                                              | 284   | 31  | 1.89E-06 |
| GO:0048858 | cell projection morphogenesis                                           | 682   | 52  | 2.69E-06 |
| GO:0061564 | axon development                                                        | 523   | 44  | 2.76E-06 |
| GO:0048812 | neuron projection morphogenesis                                         | 664   | 51  | 3.05E-06 |
| GO:0048863 | stem cell differentiation                                               | 258   | 29  | 3.37E-06 |
| GO:0031175 | neuron projection development                                           | 1012  | 67  | 3.79E-06 |
| GO:0080090 | regulation of primary metabolic process                                 | 6053  | 251 | 4.22E-06 |
| GO:0051094 | positive regulation of developmental process                            | 1341  | 81  | 4.81E-06 |
| GO:0007409 | axonogenesis                                                            | 478   | 41  | 5.89E-06 |
| GO:0120039 | plasma membrane bounded cell projection morphogenesis                   | 678   | 51  | 6.21E-06 |
| GO:0032990 | cell part morphogenesis                                                 | 699   | 52  | 6.29E-06 |
| GO:0050789 | regulation of biological process                                        | 12091 | 431 | 6.35E-06 |
| GO:0007411 | axon guidance                                                           | 283   | 30  | 7.10E-06 |
| GO:0040011 | locomotion                                                              | 2028  | 108 | 9.01E-06 |
| GO:0007610 | behavior                                                                | 586   | 46  | 1.04E-05 |
| GO:0031323 | regulation of cellular metabolic process                                | 6269  | 256 | 1.21E-05 |
| GO:0048663 | neuron fate commitment                                                  | 64    | 14  | 1.32E-05 |
| GO:0042127 | regulation of cell population proliferation                             | 1774  | 97  | 1.80E-05 |
| GO:0048645 | animal organ formation                                                  | 66    | 14  | 2.02E-05 |
| GO:0032989 | cellular component morphogenesis                                        | 791   | 55  | 2.33E-05 |
| GO:0048667 | cell morphogenesis involved in neuron differentiation                   | 602   | 46  | 2.39E-05 |
| GO:0071542 | dopaminergic neuron differentiation                                     | 38    | 11  | 2.40E-05 |
| GO:0043583 | ear development                                                         | 218   | 25  | 3.05E-05 |
| GO:0072001 | renal system development                                                | 302   | 30  | 3.22E-05 |
| GO:0045665 | negative regulation of neuron differentiation                           | 70    | 14  | 4.51E-05 |
| GO:0030878 | thyroid gland development                                               | 25    | 9   | 6.19E-05 |
| GO:0021545 | cranial nerve development                                               | 51    | 12  | 6.77E-05 |
| GO:0042391 | regulation of membrane potential                                        | 442   | 37  | 6.80E-05 |
| GO:0030900 | forebrain development                                                   | 385   | 34  | 6.80E-05 |
| GO:0021872 | forebrain generation of neurons                                         | 62    | 13  | 7.96E-05 |

|            |                                                    |       |     |          |
|------------|----------------------------------------------------|-------|-----|----------|
| GO:0001656 | metanephros development                            | 86    | 15  | 9.89E-05 |
| GO:0009058 | biosynthetic process                               | 6340  | 254 | 1.03E-04 |
| GO:1901576 | organic substance biosynthetic process             | 6248  | 251 | 1.05E-04 |
| GO:0023052 | signaling                                          | 6810  | 269 | 1.05E-04 |
| GO:0021879 | forebrain neuron differentiation                   | 53    | 12  | 1.08E-04 |
| GO:0001655 | urogenital system development                      | 337   | 31  | 1.11E-04 |
| GO:0006928 | movement of cell or subcellular component          | 2311  | 115 | 1.14E-04 |
| GO:1905330 | regulation of morphogenesis of an epithelium       | 64    | 13  | 1.19E-04 |
| GO:0001709 | cell fate determination                            | 44    | 11  | 1.30E-04 |
| GO:0008283 | cell population proliferation                      | 2054  | 105 | 1.33E-04 |
| GO:0048332 | mesoderm morphogenesis                             | 76    | 14  | 1.36E-04 |
| GO:0090304 | nucleic acid metabolic process                     | 5226  | 217 | 1.37E-04 |
| GO:0007154 | cell communication                                 | 6829  | 269 | 1.40E-04 |
| GO:0065007 | biological regulation                              | 12809 | 445 | 1.50E-04 |
| GO:0000904 | cell morphogenesis involved in differentiation     | 749   | 51  | 1.61E-04 |
| GO:0014706 | striated muscle tissue development                 | 380   | 33  | 1.62E-04 |
| GO:0044249 | cellular biosynthetic process                      | 6154  | 247 | 1.67E-04 |
| GO:0042471 | ear morphogenesis                                  | 116   | 17  | 1.84E-04 |
| GO:0061061 | muscle structure development                       | 645   | 46  | 1.90E-04 |
| GO:0060255 | regulation of macromolecule metabolic process      | 6603  | 261 | 2.05E-04 |
| GO:0009880 | embryonic pattern specification                    | 67    | 13  | 2.11E-04 |
| GO:0001822 | kidney development                                 | 293   | 28  | 2.23E-04 |
| GO:0072080 | nephron tubule development                         | 92    | 15  | 2.51E-04 |
| GO:1904888 | cranial skeletal system development                | 69    | 13  | 3.05E-04 |
| GO:0035136 | forelimb morphogenesis                             | 38    | 10  | 3.08E-04 |
| GO:0042733 | embryonic digit morphogenesis                      | 58    | 12  | 3.13E-04 |
| GO:0045597 | positive regulation of cell differentiation        | 879   | 56  | 3.34E-04 |
| GO:0048523 | negative regulation of cellular process            | 5139  | 212 | 3.82E-04 |
| GO:0061326 | renal tubule development                           | 95    | 15  | 3.89E-04 |
| GO:0098916 | anterograde trans-synaptic signaling               | 705   | 48  | 3.98E-04 |
| GO:0007268 | chemical synaptic transmission                     | 705   | 48  | 3.98E-04 |
| GO:0001704 | formation of primary germ layer                    | 123   | 17  | 4.40E-04 |
| GO:0055123 | digestive system development                       | 138   | 18  | 4.72E-04 |
| GO:0003007 | heart morphogenesis                                | 251   | 25  | 4.91E-04 |
| GO:0060537 | muscle tissue development                          | 399   | 33  | 5.06E-04 |
| GO:0035019 | somatic stem cell population maintenance           | 72    | 13  | 5.14E-04 |
| GO:0035115 | embryonic forelimb morphogenesis                   | 31    | 9   | 5.18E-04 |
| GO:0007369 | gastrulation                                       | 185   | 21  | 5.23E-04 |
| GO:0099537 | trans-synaptic signaling                           | 713   | 48  | 5.55E-04 |
| GO:2000026 | regulation of multicellular organismal development | 1447  | 79  | 5.92E-04 |
| GO:0099536 | synaptic signaling                                 | 738   | 49  | 6.26E-04 |
| GO:0001707 | mesoderm formation                                 | 74    | 13  | 7.17E-04 |
| GO:0009798 | axis specification                                 | 87    | 14  | 7.85E-04 |
| GO:0072028 | nephron morphogenesis                              | 75    | 13  | 8.44E-04 |
| GO:0010463 | mesenchymal cell proliferation                     | 42    | 10  | 8.59E-04 |
| GO:0048565 | digestive tract development                        | 129   | 17  | 8.82E-04 |
| GO:0045666 | positive regulation of neuron differentiation      | 101   | 15  | 8.86E-04 |
| GO:0042476 | odontogenesis                                      | 130   | 17  | 9.87E-04 |
| GO:0009948 | anterior/posterior axis specification              | 53    | 11  | 1.01E-03 |
| GO:0003205 | cardiac chamber development                        | 161   | 19  | 1.07E-03 |
| GO:0090596 | sensory organ morphogenesis                        | 262   | 25  | 1.11E-03 |
| GO:0060017 | parathyroid gland development                      | 7     | 5   | 1.13E-03 |
| GO:0001755 | neural crest cell migration                        | 54    | 11  | 1.23E-03 |



|            |                                                            |      |     |          |
|------------|------------------------------------------------------------|------|-----|----------|
| GO:0023061 | signal release                                             | 496  | 37  | 1.23E-03 |
| GO:0003279 | cardiac septum development                                 | 104  | 15  | 1.31E-03 |
| GO:0019222 | regulation of metabolic process                            | 7148 | 274 | 1.42E-03 |
| GO:0070848 | response to growth factor                                  | 759  | 49  | 1.43E-03 |
| GO:0010646 | regulation of cell communication                           | 3543 | 155 | 1.44E-03 |
| GO:0061138 | morphogenesis of a branching epithelium                    | 181  | 20  | 1.56E-03 |
| GO:0001944 | vasculature development                                    | 830  | 52  | 1.59E-03 |
| GO:0060993 | kidney morphogenesis                                       | 92   | 14  | 1.59E-03 |
| GO:0003206 | cardiac chamber morphogenesis                              | 120  | 16  | 1.64E-03 |
| GO:0006935 | chemotaxis                                                 | 653  | 44  | 1.75E-03 |
| GO:0048519 | negative regulation of biological process                  | 5757 | 229 | 1.77E-03 |
| GO:0048754 | branching morphogenesis of an epithelial tube              | 151  | 18  | 1.84E-03 |
| GO:0042330 | taxis                                                      | 656  | 44  | 1.98E-03 |
| GO:0048870 | cell motility                                              | 1828 | 92  | 2.07E-03 |
| GO:0051674 | localization of cell                                       | 1828 | 92  | 2.07E-03 |
| GO:0072073 | kidney epithelium development                              | 137  | 17  | 2.09E-03 |
| GO:0001568 | blood vessel development                                   | 792  | 50  | 2.10E-03 |
| GO:0048701 | embryonic cranial skeleton morphogenesis                   | 46   | 10  | 2.13E-03 |
| GO:0031324 | negative regulation of cellular metabolic process          | 2719 | 125 | 2.14E-03 |
| GO:0010467 | gene expression                                            | 6179 | 242 | 2.36E-03 |
| GO:0023051 | regulation of signaling                                    | 3578 | 155 | 2.63E-03 |
| GO:0043010 | camera-type eye development                                | 331  | 28  | 2.68E-03 |
| GO:0072009 | nephron epithelium development                             | 110  | 15  | 2.72E-03 |
| GO:0071363 | cellular response to growth factor stimulus                | 731  | 47  | 2.73E-03 |
| GO:0007350 | blastoderm segmentation                                    | 20   | 7   | 2.83E-03 |
| GO:0060231 | mesenchymal to epithelial transition                       | 20   | 7   | 2.83E-03 |
| GO:0001823 | mesonephros development                                    | 97   | 14  | 3.07E-03 |
| GO:0072078 | nephron tubule morphogenesis                               | 71   | 12  | 3.13E-03 |
| GO:0051172 | negative regulation of nitrogen compound metabolic process | 2518 | 117 | 3.14E-03 |
| GO:0014031 | mesenchymal cell development                               | 84   | 13  | 3.25E-03 |
| GO:0050954 | sensory perception of mechanical stimulus                  | 174  | 19  | 3.52E-03 |
| GO:0021602 | cranial nerve morphogenesis                                | 29   | 8   | 3.79E-03 |
| GO:0048485 | sympathetic nervous system development                     | 21   | 7   | 4.14E-03 |
| GO:0016477 | cell migration                                             | 1649 | 84  | 4.15E-03 |
| GO:0072088 | nephron epithelium morphogenesis                           | 73   | 12  | 4.25E-03 |
| GO:0034330 | cell junction organization                                 | 722  | 46  | 4.55E-03 |
| GO:0030278 | regulation of ossification                                 | 115  | 15  | 4.82E-03 |
| GO:0009719 | response to endogenous stimulus                            | 1683 | 85  | 5.03E-03 |
| GO:0001763 | morphogenesis of a branching structure                     | 195  | 20  | 5.04E-03 |
| GO:0060675 | ureteric bud morphogenesis                                 | 62   | 11  | 5.23E-03 |
| GO:0051240 | positive regulation of multicellular organismal process    | 1455 | 76  | 5.52E-03 |
| GO:0006139 | nucleobase-containing compound metabolic process           | 5746 | 226 | 5.58E-03 |
| GO:0061333 | renal tubule morphogenesis                                 | 75   | 12  | 5.72E-03 |
| GO:0003151 | outflow tract morphogenesis                                | 75   | 12  | 5.72E-03 |
| GO:0046483 | heterocycle metabolic process                              | 5904 | 231 | 5.87E-03 |
| GO:0007498 | mesoderm development                                       | 132  | 16  | 5.96E-03 |
| GO:0072171 | mesonephric tubule morphogenesis                           | 63   | 11  | 6.16E-03 |
| GO:0033993 | response to lipid                                          | 918  | 54  | 6.51E-03 |
| GO:0065008 | regulation of biological quality                           | 4131 | 172 | 6.73E-03 |
| GO:0060541 | respiratory system development                             | 199  | 20  | 6.90E-03 |
| GO:0009855 | determination of bilateral symmetry                        | 134  | 16  | 7.27E-03 |
| GO:0022603 | regulation of anatomical structure morphogenesis           | 1042 | 59  | 7.36E-03 |
| GO:0048880 | sensory system development                                 | 389  | 30  | 7.56E-03 |

|            |                                                           |      |     |          |
|------------|-----------------------------------------------------------|------|-----|----------|
| GO:0021675 | nerve development                                         | 77   | 12  | 7.61E-03 |
| GO:0031016 | pancreas development                                      | 77   | 12  | 7.61E-03 |
| GO:0009799 | specification of symmetry                                 | 135  | 16  | 8.02E-03 |
| GO:2000027 | regulation of animal organ morphogenesis                  | 184  | 19  | 8.14E-03 |
| GO:0044058 | regulation of digestive system process                    | 42   | 9   | 8.50E-03 |
| GO:0071495 | cellular response to endogenous stimulus                  | 1422 | 74  | 8.71E-03 |
| GO:0021537 | telencephalon development                                 | 256  | 23  | 8.81E-03 |
| GO:0019827 | stem cell population maintenance                          | 152  | 17  | 8.93E-03 |
| GO:0001657 | ureteric bud development                                  | 92   | 13  | 9.27E-03 |
| GO:0001508 | action potential                                          | 137  | 16  | 9.73E-03 |
| GO:0072164 | mesonephric tubule development                            | 93   | 13  | 1.05E-02 |
| GO:0072163 | mesonephric epithelium development                        | 93   | 13  | 1.05E-02 |
| GO:0098727 | maintenance of cell number                                | 154  | 17  | 1.07E-02 |
| GO:0071773 | cellular response to BMP stimulus                         | 171  | 18  | 1.11E-02 |
| GO:0071772 | response to BMP                                           | 171  | 18  | 1.11E-02 |
| GO:0014032 | neural crest cell development                             | 80   | 12  | 1.15E-02 |
| GO:0006725 | cellular aromatic compound metabolic process              | 5956 | 231 | 1.18E-02 |
| GO:0007626 | locomotory behavior                                       | 189  | 19  | 1.21E-02 |
| GO:0001654 | eye development                                           | 379  | 29  | 1.28E-02 |
| GO:0051241 | negative regulation of multicellular organismal process   | 1160 | 63  | 1.30E-02 |
| GO:0060411 | cardiac septum morphogenesis                              | 68   | 11  | 1.34E-02 |
| GO:0001764 | neuron migration                                          | 157  | 17  | 1.39E-02 |
| GO:0001658 | branching involved in ureteric bud morphogenesis          | 56   | 10  | 1.42E-02 |
| GO:0007368 | determination of left/right symmetry                      | 126  | 15  | 1.52E-02 |
| GO:0072006 | nephron development                                       | 142  | 16  | 1.55E-02 |
| GO:0150063 | visual system development                                 | 383  | 29  | 1.57E-02 |
| GO:0007351 | tripartite regional subdivision                           | 17   | 6   | 1.59E-02 |
| GO:0048486 | parasympathetic nervous system development                | 17   | 6   | 1.59E-02 |
| GO:0008595 | anterior/posterior axis specification, embryo             | 17   | 6   | 1.59E-02 |
| GO:0048839 | inner ear development                                     | 193  | 19  | 1.64E-02 |
| GO:1901360 | organic cyclic compound metabolic process                 | 6201 | 238 | 1.68E-02 |
| GO:0061371 | determination of heart left/right asymmetry               | 70   | 11  | 1.79E-02 |
| GO:0035282 | segmentation                                              | 98   | 13  | 1.89E-02 |
| GO:0048864 | stem cell development                                     | 84   | 12  | 1.93E-02 |
| GO:0048589 | developmental growth                                      | 649  | 41  | 2.03E-02 |
| GO:0001667 | ameboidal-type cell migration                             | 494  | 34  | 2.05E-02 |
| GO:0040012 | regulation of locomotion                                  | 1104 | 60  | 2.15E-02 |
| GO:2001053 | regulation of mesenchymal cell apoptotic process          | 11   | 5   | 2.24E-02 |
| GO:0090066 | regulation of anatomical structure size                   | 518  | 35  | 2.26E-02 |
| GO:0048483 | autonomic nervous system development                      | 47   | 9   | 2.27E-02 |
| GO:0060457 | negative regulation of digestive system process           | 18   | 6   | 2.32E-02 |
| GO:0003008 | system process                                            | 2293 | 105 | 2.39E-02 |
| GO:0048538 | thymus development                                        | 48   | 9   | 2.72E-02 |
| GO:0098742 | cell-cell adhesion via plasma-membrane adhesion molecules | 277  | 23  | 3.22E-02 |
| GO:0021761 | limbic system development                                 | 103  | 13  | 3.27E-02 |
| GO:0010002 | cardioblast differentiation                               | 19   | 6   | 3.31E-02 |
| GO:0042474 | middle ear morphogenesis                                  | 19   | 6   | 3.31E-02 |
| GO:0072074 | kidney mesenchyme development                             | 19   | 6   | 3.31E-02 |
| GO:0046879 | hormone secretion                                         | 317  | 25  | 3.36E-02 |
| GO:0030030 | cell projection organization                              | 1609 | 79  | 3.36E-02 |
| GO:0032879 | regulation of localization                                | 2872 | 125 | 3.38E-02 |
| GO:0016331 | morphogenesis of embryonic epithelium                     | 151  | 16  | 3.40E-02 |
| GO:0048514 | blood vessel morphogenesis                                | 711  | 43  | 3.57E-02 |

|            |                                                                |     |    |          |
|------------|----------------------------------------------------------------|-----|----|----------|
| GO:0030072 | peptide hormone secretion                                      | 260 | 22 | 3.67E-02 |
| GO:0035148 | tube formation                                                 | 152 | 16 | 3.69E-02 |
| GO:0098911 | regulation of ventricular cardiac muscle cell action potential | 12  | 5  | 3.75E-02 |
| GO:0097152 | mesenchymal cell apoptotic process                             | 12  | 5  | 3.75E-02 |
| GO:0035176 | social behavior                                                | 50  | 9  | 3.84E-02 |
| GO:0021515 | cell differentiation in spinal cord                            | 50  | 9  | 3.84E-02 |
| GO:0060688 | regulation of morphogenesis of a branching structure           | 50  | 9  | 3.84E-02 |
| GO:0014033 | neural crest cell differentiation                              | 90  | 12 | 3.96E-02 |
| GO:0042475 | odontogenesis of dentin-containing tooth                       | 90  | 12 | 3.96E-02 |
| GO:0007605 | sensory perception of sound                                    | 153 | 16 | 4.01E-02 |
| GO:0048738 | cardiac muscle tissue development                              | 224 | 20 | 4.07E-02 |
| GO:0044057 | regulation of system process                                   | 623 | 39 | 4.13E-02 |
| GO:0003156 | regulation of animal organ formation                           | 29  | 7  | 4.49E-02 |
| GO:0060039 | pericardium development                                        | 20  | 6  | 4.60E-02 |
| GO:0010817 | regulation of hormone levels                                   | 536 | 35 | 4.65E-02 |

### DMPs with Low Methylation in TYA

| Term_ID    | Term_Name                                                              | Term_Size | Intersection_Size | FDR      |
|------------|------------------------------------------------------------------------|-----------|-------------------|----------|
| GO:0050911 | detection of chemical stimulus involved in sensory perception of smell | 397       | 48                | 2.88E-29 |
| GO:0007608 | sensory perception of smell                                            | 425       | 49                | 5.72E-29 |
| GO:0050907 | detection of chemical stimulus involved in sensory perception          | 446       | 48                | 6.46E-27 |
| GO:0009593 | detection of chemical stimulus                                         | 483       | 49                | 2.36E-26 |
| GO:0007606 | sensory perception of chemical stimulus                                | 497       | 49                | 8.91E-26 |
| GO:0050906 | detection of stimulus involved in sensory perception                   | 512       | 48                | 3.46E-24 |
| GO:0051606 | detection of stimulus                                                  | 687       | 51                | 3.49E-21 |
| GO:0007600 | sensory perception                                                     | 958       | 53                | 2.83E-16 |
| GO:0007186 | G protein-coupled receptor signaling pathway                           | 1355      | 60                | 3.39E-14 |
| GO:0050877 | nervous system process                                                 | 1426      | 59                | 1.54E-12 |
| GO:0003008 | system process                                                         | 2293      | 64                | 3.49E-06 |
| GO:0007154 | cell communication                                                     | 6829      | 129               | 1.71E-04 |
| GO:0023052 | signaling                                                              | 6810      | 128               | 2.89E-04 |
| GO:0042221 | response to chemical                                                   | 4781      | 99                | 3.02E-04 |
| GO:0007165 | signal transduction                                                    | 6309      | 121               | 3.05E-04 |
| GO:0050896 | response to stimulus                                                   | 9407      | 161               | 5.25E-04 |
| GO:0032501 | multicellular organismal process                                       | 7946      | 141               | 1.31E-03 |
| GO:0051716 | cellular response to stimulus                                          | 7781      | 138               | 2.27E-03 |

**Table S7.** GO Biological processes enriched in DMPs in TYA of Group 3 tumours DMPs with High Methylation in TYA

| Term_ID    | Term_Name                                                   | Term_Size | Intersection_Size | FDR      |
|------------|-------------------------------------------------------------|-----------|-------------------|----------|
| GO:0007420 | brain development                                           | 754       | 25                | 4.88E-04 |
| GO:0006366 | transcription by RNA polymerase II                          | 2723      | 55                | 6.26E-04 |
| GO:0006357 | regulation of transcription by RNA polymerase II            | 2555      | 52                | 1.19E-03 |
| GO:0032502 | developmental process                                       | 6628      | 101               | 1.20E-03 |
| GO:0051254 | positive regulation of RNA metabolic process                | 1714      | 39                | 3.27E-03 |
| GO:0007399 | nervous system development                                  | 2449      | 49                | 4.69E-03 |
| GO:0030900 | forebrain development                                       | 385       | 16                | 4.99E-03 |
| GO:0006355 | regulation of transcription, DNA-templated                  | 3534      | 63                | 5.27E-03 |
| GO:1903506 | regulation of nucleic acid-templated transcription          | 3535      | 63                | 5.32E-03 |
| GO:2001141 | regulation of RNA biosynthetic process                      | 3540      | 63                | 5.59E-03 |
| GO:1903508 | positive regulation of nucleic acid-templated transcription | 1617      | 37                | 5.65E-03 |
| GO:0045893 | positive regulation of transcription, DNA-templated         | 1617      | 37                | 5.65E-03 |

|            |                                                                         |      |    |          |
|------------|-------------------------------------------------------------------------|------|----|----------|
| GO:1902680 | positive regulation of RNA biosynthetic process                         | 1618 | 37 | 5.73E-03 |
| GO:0048856 | anatomical structure development                                        | 6106 | 93 | 6.22E-03 |
| GO:0006351 | transcription, DNA-templated                                            | 3714 | 65 | 6.37E-03 |
| GO:0097659 | nucleic acid-templated transcription                                    | 3715 | 65 | 6.43E-03 |
| GO:0048731 | system development                                                      | 5052 | 81 | 6.48E-03 |
| GO:0032774 | RNA biosynthetic process                                                | 3731 | 65 | 7.48E-03 |
| GO:0007417 | central nervous system development                                      | 1032 | 27 | 1.47E-02 |
| GO:0007275 | multicellular organism development                                      | 5613 | 86 | 1.74E-02 |
| GO:0030154 | cell differentiation                                                    | 4350 | 71 | 2.25E-02 |
| GO:0045944 | positive regulation of transcription by RNA polymerase II               | 1197 | 29 | 2.81E-02 |
| GO:0021537 | telencephalon development                                               | 256  | 12 | 2.89E-02 |
| GO:0045935 | positive regulation of nucleobase-containing compound metabolic process | 1887 | 39 | 3.24E-02 |
| GO:0051252 | regulation of RNA metabolic process                                     | 3822 | 64 | 3.54E-02 |
| GO:0010467 | gene expression                                                         | 6179 | 91 | 4.13E-02 |
| GO:0048869 | cellular developmental process                                          | 4428 | 71 | 4.26E-02 |

## DMPs with Low Methylation in TYA

| Term_ID    | Term_Name                                     | Term_Size | Intersection_Size | FDR      |
|------------|-----------------------------------------------|-----------|-------------------|----------|
| GO:0030198 | extracellular matrix organization             | 401       | 19                | 3.74E-05 |
| GO:0043062 | extracellular structure organization          | 402       | 19                | 3.89E-05 |
| GO:0045229 | external encapsulating structure organization | 404       | 19                | 4.22E-05 |

**Table S8.** Prognostic gene signature. The 22-genes signature that are strongly associated with the overall survival of medulloblastoma patients (n = 729). The risk score derived from the signature stratifies patients into low- and high-risk patients.

| Gene Symbol | Gene Description                                                                | NCBI Gene ID | CHR | Karyotype Band |
|-------------|---------------------------------------------------------------------------------|--------------|-----|----------------|
| PIK3C2G     | phosphatidylinositol-4-phosphate 3-kinase catalytic subunit type 2 gamma        | 5288         | 12  | p12.3          |
| SEC14L1     | SEC14 like lipid binding 1                                                      | 6397         | 17  | q25.2          |
| E2F6        | E2F transcription factor 6                                                      | 1876         | 2   | p25.1          |
| PHLPP1      | PH domain and leucine rich repeat protein phosphatase 1                         | 23239        | 18  | q21.33         |
| CDKN1B      | cyclin dependent kinase inhibitor 1B                                            | 1027         | 12  | p13.1          |
| TIPARP      | TCDD inducible poly (ADP-ribose) polymerase                                     | 25976        | 3   | q25.31         |
| MRT04       | MRT4 homolog, ribosome maturation factor                                        | 51154        | 1   | p36.13         |
| GUCY1A2     | guanylate cyclase 1 soluble subunit alpha 2                                     | 2977         | 11  | q22.3          |
| CITED1      | Cbp/p300 interacting transactivator with Glu/Asp rich carboxy-terminal domain 1 | 4435         | X   | q13.1          |
| SCD5        | stearoyl-CoA desaturase 5                                                       | 79966        | 4   | q21.22         |
| CACNB2      | calcium voltage-gated channel auxiliary subunit beta 2                          | 783          | 10  | p12.33         |
| EPHA6       | EPH receptor A6                                                                 | 285220       | 3   | q11.2          |
| GJD2        | gap junction protein delta 2                                                    | 57369        | 15  | q14            |
| MTMR8       | myotubularin related protein 8                                                  | 55613        | X   | q11.2          |
| DNAH2       | dynein axonemal heavy chain 2                                                   | 146754       | 17  | p13.1          |
| RAB34       | RAB34, member RAS oncogene family                                               | 83871        | 17  | q11.2          |
| LFNG        | LFNG O-fucosylpeptide 3-beta-N-acetylglucosaminyltransferase                    | 3955         | 7   | p22.3          |
| PLD2        | phospholipase D2                                                                | 5338         | 17  | p13.2          |
| FZD2        | frizzled class receptor 2                                                       | 2535         | 17  | q21.31         |
| AP1G2       | adaptor related protein complex 1 subunit gamma 2                               | 8906         | 14  | q11.2          |
| F8          | coagulation factor VIII                                                         | 2157         | X   | q28            |

**Table S9.** Univariate and multivariate Cox proportional hazard ratios for gender, molecular subgroup, and risk score for TYA in medulloblastoma.

| Variable   |        | Univariate analysis |                      | Multivariate analysis |         |
|------------|--------|---------------------|----------------------|-----------------------|---------|
|            |        | HR (95% CI)         | P-value <sup>a</sup> | HR (95% CI)           | P-value |
| Gender     |        |                     |                      |                       |         |
|            | Female | Reference           |                      | Reference             |         |
|            | Male   | 0.56 (0.23 - 1.34)  | 0.192                | 0.79 (0.30 - 2.08)    | 0.636   |
| Subgroup   |        |                     |                      |                       |         |
|            | WNT    | Reference           |                      | Reference             |         |
|            | SHH    | 2.49 (0.51 - 12.01) | 0.257                | 1.21 (0.20 - 7.28)    | 0.839   |
|            | G3     | 0.99 (0.09 - 10.96) | 0.992                | 0.08 (0.004 - 1.57)   | 0.096   |
|            | G4     | 2.20 (0.48 - 10.04) | 0.310                | 0.17 (0.02 - 1.62)    | 0.123   |
| Risk score |        |                     |                      |                       |         |
|            | High   | Reference           |                      | Reference             |         |
|            | Low    | 0.34 (0.12 - 0.94)  | 0.037 <sup>b</sup>   | 0.07 (0.01 - 0.34)    | 0.001   |

Abbreviations: CI = confidence interval; HR = hazard ratio. <sup>a</sup> P-value is obtained from the Wald test. likelihood ratio test. <sup>b</sup> The likelihood ratio test = 5.02 on 1 df, P-value = 0.025.

**Table S10.** C-index for univariate and multivariate Cox proportional models for TYA in medulloblastoma.

| Variable   | Univariate analysis | Multivariate analysis                        |         |                    |
|------------|---------------------|----------------------------------------------|---------|--------------------|
|            | C-index             |                                              | C-index | Validation C-index |
| Gender     | 0.55                | Model: <i>Gender + Subgroup + Risk score</i> | 0.70    | 0.68               |
| Subgroup   | 0.57                |                                              |         |                    |
| Risk score | 0.64                |                                              |         |                    |

Abbreviations: C-index = concordance index; Validation C-index = C-index obtained from resampling of TYA patient data (n = 1000).
